# Supplementary material for: Inflammatory Bacteriome Featuring <em>Fusobacterium nucleatum</em> and <em>Pseudomonas aeruginosa </em>Identified in Association with Oral Squamous Cell Carcinoma<strong></strong>
Source: Preprints.org preprint supplement (doi:10.20944/preprints201703.0024.v1), 2017-03-06
Supplement: Supplementary file 1 [file S1. Phyla abundances and Frequencies.xls]

## Sheet: Abundance
Abundances of phyla
Status	Cancer	Cancer	Cancer	Cancer	Cancer	Cancer	Cancer	Cancer	Cancer	Cancer	Cancer	Cancer	Cancer	Cancer	Cancer	Cancer	Cancer	Cancer	Cancer	Cancer	Control	Control	Control	Control	Control	Control	Control	Control	Control	Control	Control	Control	Control	Control	Control	Control	Control	Control	Control	Control	Overall	OSCC	Control
ID	C1	C2	C3	C4	C5	C6	C7	C8	C9	C10	C11	C12	C13	C14	C15	C16	C17	C18	C19	C20	N1	N2	N3	N4	N5	N6	N7	N8	N9	N10	N11	N12	N13	N14	N15	N16	N17	N18	N19	N20
Fusobacteria	0.116607	0.763036	0.295641	0.347531	0.166937	0.129855	0.34631	0.673568	0.132011	0.000703482	0.450153	0.381965	0.499401	0.00124275	0.541475	0.00224329	0.10076	0.32476	0.601763	0.328692	0.0129969	0.00507204	0.238224	0.00384142	0.197205	0.450978	0.00469242	0.0191232	0.0680807	0.0346785	0.198537	0.680744	0.562375	0.220067	0.256457	0.303525	0.191102	0.123988	0.0987071	0.155035	0.250752	0.310233	0.200654
Proteobacteria	0.773668	0.0365161	0.266769	0.106482	0.367621	0.0386229	0.306393	0.164284	0.316667	0.722242	0.0985117	0.187826	0.102895	0.656291	0.192231	0.925175	0.137452	0.234943	0.174915	0.0707911	0.0878475	0.168406	0.204338	0.333317	0.177142	0.119004	0.25699	0.0245523	0.373409	0.197647	0.353445	0.116977	0.0992758	0.0441472	0.168058	0.268404	0.284834	0.167355	0.182799	0.116383	0.240616	0.294015	0.192446
Firmicutes	0.0246761	0.0803851	0.174924	0.12492	0.109868	0.734588	0.0956427	0.0334401	0.237434	0.258178	0.115636	0.137478	0.0408097	0.197657	0.111448	0.0684565	0.482985	0.130302	0.144369	0.0854926	0.868608	0.508894	0.323065	0.0831322	0.426072	0.070896	0.159092	0.311563	0.189136	0.600165	0.0415524	0.0780124	0.0613733	0.227945	0.252777	0.165479	0.247103	0.308938	0.616639	0.180769	0.227748	0.169434	0.2554
Bacteroidetes	0.0743508	0.116439	0.239987	0.408204	0.232977	0.0891877	0.209268	0.11893	0.249471	0.0184078	0.21365	0.245502	0.32158	0.143686	0.131766	0.00340111	0.256559	0.107687	0.0744027	0.322483	0.0218196	0.298001	0.111026	0.00393992	0.174099	0.29744	0.0884489	0.622964	0.244801	0.13954	0.241419	0.0178482	0.196138	0.320327	0.241275	0.170479	0.215463	0.178424	0.0725126	0.417876	0.191294	0.178897	0.213264
Actinobacteria	0.00376324	0.00184712	0.00377996	0.0127206	0.00145237	0.00623991	0.0228238	0.00944869	0.0384259	0.000234494	0.00186811	0.0292368	0.0346066	0.000769322	0.00411768	0.000723641	0.0174905	0.00931568	0.0039818	0.192498	0.00474338	0.00632167	0.121294	0.57572	0.0194923	0.050007	0.489876	0.0120736	0.122607	0.0137269	0.160558	0.0983744	0.015048	0.18298	0.018863	0.0844894	0.0519905	0.219065	0.0194491	0.127502	0.0697382	0.0197672	0.12576
Spirochaetes	0.00333315	0.00138534	0.000241274	0	0.0567279	0	0.00108685	0	0.0116402	0	0.0967059	0.00841555	0.000217652	0.000118357	0.0106193	0	0.00161597	0.182564	5.69e-05	4.31e-05	0	0	0	0	0.000760673	0.000140667	0	0.000243092	0	0	8.31e-05	0	0.000359509	0.00118915	0.041998	0	0.000222816	0.000247811	0.00269814	0.000105899	0.0105705	0.0187386	0.00252889
Saccharibacteria (TM7)	0.00107521	0	0.014396	0	0.000170867	0	0.0123506	0.00032865	0.00218254	0	0.000809515	0.00899594	0.000163239	0	0.0051471	0	9.51e-05	0.000937427	0.000511945	0	0.00189735	0.0132314	0.0019253	4.92e-05	0.00123609	0.00682234	6.43e-05	0.00785998	0.00124159	0.0129012	8.31e-05	0.00125691	0.053156	0.00230398	0.004535	0.00124984	0.000371361	0.00165207	0.00303541	0.00232977	0.00410916	0.0023582	0.00606868
SR1	0.00193538	3.55e-05	0.000241274	0	0.0336608	0	0.00582946	0	0.00621693	0	0.0220437	0.000507835	0	0	0.00265482	0	0	0	0	0	0.00189735	0	0.000128353	0	0.00399353	0.00196934	0	0.000162061	0.000724263	0.00134173	0.00423835	0	0.00287607	0	0.00749261	0.0063742	0.00846702	8.26e-05	0.00134907	0	0.00285556	0.00365629	0.00206312
Synergistetes	0	0.000355215	0.00249316	0.000142929	0.0288765	0	0.000296413	0	0.00191799	0	0.000311352	7.25e-05	0	0	0	0	0.00304183	0.00837825	0	0	0	0	0	0	0	0	0	0.000567215	0	0	0	0	0	0.0010405	0.00847847	0	0	8.26e-05	0.00191119	0	0.00144915	0.00229431	0.000635788
Gracilibacteria_(GN02)	0.000268803	0	0	0	0.00170867	0	0	0	0.00185185	0	0.000249082	0	0	0	0.0005418	0	0	0	0	0	0.000189735	7.35e-05	0	0	0	0.002743	0	0	0	0	8.31e-05	0	0.00939859	0	0	0	0.000445633	0	0.000899382	0	0.000461329	0.00023101	0.000718064
Deinococcus-Thermus	0	0	0.000804246	0	0	0.00107585	0	0	0.000330688	0	0	0	0	0.000177536	0	0	0	0	0	0	0	0	0	0	0	0	0	0.000324123	0	0	0	0	0	0	0	0	0	0	0	0	6.7811e-05	0.000119416	1.70591e-05
Chloroflexi	0.000322563	0	0.000723822	0	0	0	0	0	0.00026455	0	0	0	0.000326477	0	0	0	0	0.000117178	0	0	0	0	0	0	0	0	0	0	0	0	0	0	0	0	6.57e-05	0	0	0.000165207	0	0	4.96374e-05	8.77295e-05	1.2153e-05
Tenericutes	0	0	0	0	0	0	0	0	0.000132275	0	0	0	0	0	0	0	0	0.000996016	0	0	0	0	0	0	0	0	0	0	0	0	0	0	0	0	0	0	0	0	0	0	2.82073e-05	5.64146e-05	0

## Sheet: Frequencies
Detection Frequencies of phyla
Status	Cancer	Cancer	Cancer	Cancer	Cancer	Cancer	Cancer	Cancer	Cancer	Cancer	Cancer	Cancer	Cancer	Cancer	Cancer	Cancer	Cancer	Cancer	Cancer	Cancer	Control	Control	Control	Control	Control	Control	Control	Control	Control	Control	Control	Control	Control	Control	Control	Control	Control	Control	Control	Control	Overall	OSCC	Control
ID	C1	C2	C3	C4	C5	C6	C7	C8	C9	C10	C11	C12	C13	C14	C15	C16	C17	C18	C19	C20	N1	N2	N3	N4	N5	N6	N7	N8	N9	N10	N11	N12	N13	N14	N15	N16	N17	N18	N19	N20
Actinobacteria	1	1	1	1	1	1	1	1	1	1	1	1	1	1	1	1	1	1	1	1	1	1	1	1	1	1	1	1	1	1	1	1	1	1	1	1	1	1	1	1	1	1	1
Bacteroidetes	1	1	1	1	1	1	1	1	1	1	1	1	1	1	1	1	1	1	1	1	1	1	1	1	1	1	1	1	1	1	1	1	1	1	1	1	1	1	1	1	1	1	1
Firmicutes	1	1	1	1	1	1	1	1	1	1	1	1	1	1	1	1	1	1	1	1	1	1	1	1	1	1	1	1	1	1	1	1	1	1	1	1	1	1	1	1	1	1	1
Fusobacteria	1	1	1	1	1	1	1	1	1	1	1	1	1	1	1	1	1	1	1	1	1	1	1	1	1	1	1	1	1	1	1	1	1	1	1	1	1	1	1	1	1	1	1
Proteobacteria	1	1	1	1	1	1	1	1	1	1	1	1	1	1	1	1	1	1	1	1	1	1	1	1	1	1	1	1	1	1	1	1	1	1	1	1	1	1	1	1	1	1	1
Saccharibacteria (TM7)	1	0	1	0	1	0	1	1	1	0	1	1	1	0	1	0	1	1	1	0	1	1	1	1	1	1	1	1	1	1	1	1	1	1	1	1	1	1	1	1	0.825	0.65	1
Spirochaetes	1	1	1	0	1	0	1	0	1	0	1	1	1	1	1	0	1	1	1	1	0	0	0	0	1	1	0	1	0	0	1	0	1	1	1	0	1	1	1	1	0.65	0.75	0.55
SR1	1	1	1	0	1	0	1	0	1	0	1	1	0	0	1	0	0	0	0	0	1	0	1	0	1	1	0	1	1	1	1	0	1	0	1	1	1	1	1	0	0.575	0.45	0.7
Synergistetes	0	1	1	1	1	0	1	0	1	0	1	1	0	0	0	0	1	1	0	0	0	0	0	0	0	0	0	1	0	0	0	0	0	1	1	0	0	1	1	0	0.375	0.5	0.25
Gracilibacteria_(GN02)	1	0	0	0	1	0	0	0	1	0	1	0	0	0	1	0	0	0	0	0	1	1	0	0	0	1	0	0	0	0	1	0	1	0	0	0	1	0	1	0	0.3	0.25	0.35
Chloroflexi	1	0	1	0	0	0	0	0	1	0	0	0	1	0	0	0	0	1	0	0	0	0	0	0	0	0	0	0	0	0	0	0	0	0	1	0	0	1	0	0	0.175	0.25	0.1
Deinococcus-Thermus	0	0	1	0	0	1	0	0	1	0	0	0	0	1	0	0	0	0	0	0	0	0	0	0	0	0	0	1	0	0	0	0	0	0	0	0	0	0	0	0	0.125	0.2	0.05
Tenericutes	0	0	0	0	0	0	0	0	1	0	0	0	0	0	0	0	0	1	0	0	0	0	0	0	0	0	0	0	0	0	0	0	0	0	0	0	0	0	0	0	0.05	0.1	0
Number of Phyla	10	8	11	6	10	6	9	6	13	5	10	9	8	7	9	5	8	10	7	6	8	7	7	6	8	9	6	10	7	7	9	6	9	8	10	7	9	10	10	7	13	13	12
