# Supplementary material for: Inflammatory Bacteriome Featuring <em>Fusobacterium nucleatum</em> and <em>Pseudomonas aeruginosa </em>Identified in Association with Oral Squamous Cell Carcinoma<strong></strong>
Source: Preprints.org preprint supplement (doi:10.20944/preprints201703.0024.v1), 2017-03-06
Supplement: Supplementary file 2 [file S2. Genera abundances and Frequencies.xls]

## Sheet: Abundance
Abundances of genera
Status	Cancer	Cancer	Cancer	Cancer	Cancer	Cancer	Cancer	Cancer	Cancer	Cancer	Cancer	Cancer	Cancer	Cancer	Cancer	Cancer	Cancer	Cancer	Cancer	Cancer	Control	Control	Control	Control	Control	Control	Control	Control	Control	Control	Control	Control	Control	Control	Control	Control	Control	Control	Control	Control	Over all	OSCC	Control
ID	C1	C2	C3	C4	C5	C6	C7	C8	C9	C10	C11	C12	C13	C14	C15	C16	C17	C18	C19	C20	N1	N2	N3	N4	N5	N6	N7	N8	N9	N10	N11	N12	N13	N14	N15	N16	N17	N18	N19	N20
Fusobacterium	0.0884361	0.35898	0.17227	0.224612	0.129859	0.118451	0.196028	0.483362	0.0946429	0.000586235	0.289433	0.275392	0.165796	0.000473429	0.345777	0.00115783	0.0612167	0.20389	0.460011	0.249623	0.0105303	0.0027933	0.112822	0.00123122	0.0350861	0.0580954	0.000899916	0.00251195	0.0525608	0.0283827	0.174852	0.265795	0.100817	0.159643	0.214328	0.257405	0.093063	0.0408888	0.0430579	0.0919199	0.141667	0.196	0.0913765
Streptococcus	0.00849417	0.000781472	0.106161	0.0788251	0.00478428	0.581926	0.0383361	0.00332758	0.0564153	0.182671	0.0298898	0.0525972	0.00609424	0.00834418	0.00140868	0.0360373	0.255323	0.017108	0.00489192	0.0276784	0.659046	0.437004	0.274548	0.0454568	0.342588	0.0422704	0.0968696	0.255571	0.13285	0.472495	0.0266766	0.0243841	0.0370294	0.118841	0.12021	0.136108	0.203357	0.165538	0.420349	0.0769882	0.139732	0.0750547	0.180481
Leptotrichia	0.0277404	0.40395	0.121441	0.122919	0.00170867	0.011404	0.150282	0.190206	0.0359127	0.000117247	0.16072	0.1065	0.333605	0.000118357	0.195698	0.00108546	0.0395437	0.118292	0.141069	0.0790688	0.00246656	0.00227874	0.125401	0.0026102	0.162118	0.392882	0.00359967	0.0139373	0.0155199	0.00598617	0.0236849	0.414949	0.461558	0.0563359	0.0421295	0.0457443	0.0980392	0.0769866	0.0556492	0.0627978	0.107651	0.112069	0.108537
Haemophilus	0.483737	0.000745951	0.114525	0.0205817	0.0256301	0.00892953	0.012647	0.00324542	0.0126323	0	0.0390435	0.0358387	0.0469583	0.292461	0.00043344	7.24e-05	0.00294677	0.0021678	0.00591581	0.000431127	0.0801632	0.149662	0.16442	0.329377	0.110868	0.00696301	0.244199	0.0199336	0.160579	0.040355	0.177179	0.0268141	0.00513584	0.0285396	0.0531712	0.116485	0.23678	0.139105	0.128949	0.0692577	0.084922	0.0554471	0.116199
Prevotella	0.0134401	0.0166596	0.229693	0.0776817	0.100982	0.070468	0.0575042	0.0143374	0.141534	0.0182905	0.0517467	0.0595618	0.0384699	0.00171618	0.0197757	0	0.255989	0.030525	0.0141069	0.0200905	0.00284603	0.000808586	0.00462072	0.00379217	0.0143577	0.0553524	0.087999	0.00623937	0.118676	0.0277634	0.00415524	0.00234624	0.0468389	0.314307	0.0701282	0.00868641	0.017751	0.152404	0.00865655	0.402944	0.0645811	0.0616286	0.0709382
Rothia	0.00247299	0.000284172	0.00160849	0.000428786	0.000939769	0.000430339	0.00988045	0	0.00482804	0	0.000498163	0.0116077	0.00299271	0	0.00043344	0.000578913	0.00456274	0	0.000113766	0.191421	0.00426904	0.0047045	0.103581	0.568284	0.0138823	0.000633	0.455036	0.00899441	0.111847	0.0042316	0.158979	0.0338529	0.000770376	0.156224	0.00571804	0.0824272	0.0447118	0.201057	0.0098932	0.0885312	0.0572677	0.011654	0.108072
Capnocytophaga	0.0429547	0.0883419	0.000402123	0.271779	0.00222127	0.000430339	0.130422	0.0838468	0.0314815	0	0.0730432	0.0420778	0.24834	0.139425	0.055101	0.00253274	0.000285171	0.00638622	0.0107509	0.245527	0.00853809	0.000955601	0.00269542	0.000147747	0.0314729	0.222464	6.43e-05	0.00226886	0.00144853	0.0062958	0.1333	0.00712251	0.0690257	0.000668896	0.123365	0.0744282	0.0179739	0.0132992	0.0400225	0.000423594	0.0557832	0.0737674	0.0393391
Campylobacter	0.227945	0.0187909	0.0061927	0.0123633	0.314652	0.000860678	0.220235	0.0114617	0.161772	0	0.0367395	0.0240133	0.00228534	0.00118357	0.0503874	0.000361821	0.0758555	0.225744	0.0250853	0.069584	0.000379471	0	0.0041073	0.00177296	0.0077969	0.036503	0.0100919	0.000891338	0.0123125	0.00288988	8.31e-05	0.000167588	0.0232654	0.00958751	0.0958922	0.000749906	0.00609031	0.0226334	0.000899382	0.0241449	0.0436443	0.0742757	0.0136779
Porphyromonas	0.00903177	0.00955527	0.00104552	0.002001	0.1261	0.00785368	0.0130422	0.0109276	0.025463	0	0.0617099	0.0945299	0.00408097	0.00218961	0.030991	0.000723641	9.51e-05	0.0455824	0.0324232	0.00582022	0.00521772	0.284402	0.0997305	0	0.0566702	0.00942467	0.000321399	0.00980472	0.113295	0.0918567	0.0977312	0.000670354	0.0323558	0.00371609	0.0165626	0.0817398	0.17402	0.00710391	0.0176504	0.0108017	0.039906	0.0241583	0.0583082
Neisseria	0.0116123	0.000355215	0.125945	0.0629601	0.00743272	0.000753093	0.0593815	0.0131049	0.0162698	0	0.00236627	0.0838654	0.0192077	0.00307729	0.0446443	0.00289456	0.000285171	5.86e-05	0.000170648	0.000388015	0.00521772	0.00735078	0.0282377	0.00216695	0.034991	0.0355184	0.000192839	0.000891338	0.199586	0.117453	0.165295	0.0169264	0.00960403	0.00572278	0.00282616	0.145919	0.0414438	0.00330415	0.0260821	0.0223446	0.0331462	0.0227386	0.0455714
Pseudomonas	0.00118273	0.000106564	0.00209104	0.000571714	0.00299017	0.00129102	0.0021737	0	0.0236111	0.344355	6.23e-05	0.0137841	0.005931	0.232039	0.0002709	0.140965	0.000665399	0.000878838	0.000113766	0.000258676	0.000189735	0	0	0	0	0	0	0.000972369	0	0	0.00116347	0.0042735	0	0	0.000262898	0	0.000148544	0	0.000112423	0	0.0195116	0.0386671	0.000364906
Enterobacter	0	0	0	0	8.54e-05	0	0	0	0	0.00586235	0	0	0	0.000118357	0	0.761633	9.51e-05	0	0	0	0	7.35e-05	0.000128353	0	0	0	0	0	0	0	0	0.000418971	0	0	0	0	0	0	0	0	0.0192104	0.0383897	3.26749e-05
Bergeyella	0	0.00106564	0.00273444	0.00192954	0	0	0.00108685	0.000164325	0.00634921	0	0.00118314	0.00116077	0.00206769	0.000177536	0.0115403	0	0	0.000292946	0.000113766	0.0471222	0.00474338	0.00992355	0.00282377	0	0.0558144	0.00330567	6.43e-05	0.54242	0.00910502	0.00825679	0.00565113	0.000502765	0.00374917	0.000222965	0.00170884	0.00381202	0.00438206	0.000578226	0.00269814	0	0.0184188	0.00384942	0.0344747
Veillonella	0.00166658	0.000106564	0.051713	0.00836132	0.000170867	0.000860678	0.0195633	0.00152001	0.0260582	0.000468988	0.00136995	0.0109547	0.00163239	0.000177536	5.42e-05	0	0.0750951	0.00193344	0.0019909	4.31e-05	0.000853809	7.35e-05	0.0154024	0.0341295	0.00209185	0.00330567	0.0526451	0.00453772	0.0329022	0.0819486	0.0017452	0.00175968	0.00796056	0.0648829	0.0322708	0.00749906	0.00557041	0.0944986	0.00112423	0.0503018	0.0174811	0.010187	0.0260342
Granulicatella	0.00107521	7.1e-05	0.0049059	0.0161509	8.54e-05	0.100377	0.0182788	0.00221839	0.0477513	0.000117247	0.00149449	0.00638421	0.00136032	0	0.00048762	0.0132426	0.0143536	0.000117178	0.00130831	0.0230222	0.169434	0.0018377	0.0165576	0.00246245	0.0205382	0.000351667	0.00514238	0.0260919	0.00786343	0.0118691	0.0112191	0.00201106	0.00154075	0.0217763	0.0040092	0.012061	0.00831848	0.00859078	0.00269814	0.0076247	0.01487	0.0126401	0.00908231
Gemella	0.00467717	0.00213129	0.00361911	0.00628886	0.00170867	0.00731576	0.00256892	0.00361515	0.00476191	0	0.0107105	0.00993906	0.00108826	0.0108889	0.00086688	0.00238802	0.0019962	0.00146473	0.031058	0.0184954	0.038706	0.066304	0.00346554	0.000443241	0.0563849	0.000140667	0.000385678	0.0219593	0.000931195	0.0153783	0.000249314	0.00167588	0.00287607	0.00431066	0.0191259	0.00437445	0.0110665	0.00479101	0.180101	0.00201207	0.0140066	0.00627914	0.0208408
Treponema	0.00333315	0.00138534	0.000241274	0	0.0557881	0	0.00088924	0	0.0116402	0	0.0967059	0.00841555	0.000217652	0.000118357	0.0106193	0	0.00161597	0.182564	5.69e-05	4.31e-05	0	0	0	0	0.000760673	0.000140667	0	0.000162061	0	0	8.31e-05	0	0.000359509	0.00118915	0.0418666	0	0.000222816	0.000247811	0.00269814	0.000105899	0.0105368	0.0186817	0.00251771
Aggregatibacter	0.0131713	0.00131429	0.0102944	0.00314443	0.0161469	0.0103281	0.000296413	0.0151179	0.0187169	0	0.00211719	0.0124782	0.00740015	0.0169251	0.0428564	0.000217092	0.0507605	0	0.0324801	0	0.000189735	0.00205822	0	0	0.00827232	0.00604867	6.43e-05	0.000486184	0.000103466	0.0341625	0.00016621	0	0.0230599	7.43e-05	0.000788695	0.00406199	0	0.000413018	0.00483418	0.000317696	0.00847167	0.0126883	0.00446903
Alloprevotella	0.00758024	0.000106564	0.00603185	0.0537412	0.00187954	0.010113	0.00424859	0.00891463	0.00291005	0.000117247	0.00429666	0.0274231	0.0194254	0.000118357	0.00357588	0	0	0.0111319	0.0167804	0.00392326	0.000474338	0.00154366	0.000898473	0	0.0072264	0.001055	0	0.0622316	0.00227626	0.00505728	8.31e-05	0.000251383	0.00097581	0.000966184	0.016234	0.00143732	0.00126263	0.00396498	0.000337268	0.00370645	0.0073075	0.00911589	0.00576357
Mycoplasma	0	3.55e-05	0.000643397	0.00357321	0.00162324	0.00828402	0	0	0.000132275	0.0250909	0	0	0	0.174222	0	0	0.0153992	0.00070307	0.000341297	0	0	0	0	0	0	0	6.43e-05	0	0	0	0	0.00108932	0	0.000371609	0.00197174	0	0	0.000165207	0	0	0.00584275	0.0115024	0.000192746
multigenus	0	0	0	0	0	0	0	0	0	0.20061	0	0	0	0	0	0	0	0	0	0	0	0	0	0	0	0	0	0	0	0	0	0	0	0	0	0	0	0	0	0	0.00501524	0.0100305	0
Catonella	0.000752648	0.0252202	8.04e-05	0	0.016745	0.0013986	0.00108685	0	0.00330688	0	0.042157	0.0192252	0.00163239	0	0.0253021	0	0	0.0226154	0.0162116	0.00176762	0	7.35e-05	0.000128353	0	0	0.000492334	0	0	0.00269012	0.00010321	0	0	0.000359509	0.000520253	0.00617811	0.000124984	0.00118835	0.00140426	0.000786959	0	0.0047888	0.0088751	0.000739471
Parvimonas	0.00419332	0.0169793	0.000241274	0.00257272	0.0193934	0.0188273	0.00424859	0.015693	0.00277778	0	0.000684974	0.00906848	0.0067472	0.000355072	0.00032508	0	0.000190114	0.0120108	0.0370307	0	0	0	0.000513413	0	9.51e-05	0	6.43e-05	0.000405154	0	0	0	0.000586559	0.000102717	0.000594575	0.0233322	0.000812398	0.000148544	0	0.000112423	0.000211797	0.00445796	0.00756696	0.00141996
Actinomyces	0.000322563	0.000213129	0.000723822	0.00443079	0	0.00236686	0.00553305	0.0006573	0.00244709	0	0.000124541	0.00478816	0.00321036	0	0.00151704	0	0.00380228	0.000175768	0.00227531	0.000689804	9.49e-05	0.000147016	0.0169426	0.00699335	0.00190168	0.00218033	0.0145915	0.000405154	0.00848422	0.00753432	0.00116347	0.00930116	0.000616301	0.0184318	0.0103188	0.0015623	0.00304516	0.00388237	0.000899382	0.0299693	0.00429357	0.00166389	0.00728264
Oribacterium	0	0.00863171	0.000241274	0.00364468	0.000341734	0	0.00187729	0	0.0518519	0	0.000249082	0.00471561	0	0	0	0	0.0217681	0.00275369	0.00159272	0.00612201	0	0.000294031	0.0019253	0.000393992	9.51e-05	0	6.43e-05	0	0.0064149	0.00010321	0.000249314	0.00913357	0	0.0034188	0.000197174	0.000624922	0.00393642	0.0246159	0.000112423	0.0163084	0.00429194	0.00518949	0.00357304
Moraxella	0.0310736	0	0	0.000428786	0	0	0	0	0.054828	0	0.0178716	0.000798027	0	0	0.0438316	0	0	0.00199203	0	0	0	0	0	0	0.000380337	0	0	8.1e-05	0	0.00020642	0.00648217	0.00268141	0.00066766	0	0	0.000187477	7.43e-05	0	0.00517145	0	0.0041689	0.00754118	0.000838538
Kingella	0.0023117	0	0.00458421	0.000142929	0.000170867	0	0.00256892	0.00176649	0.00277778	0	0.000186811	0.0018137	0	0.000236714	0.0035217	0.000361821	0.00152091	0	0.109158	0	0.000664074	0	0	0	0.000760673	0.000773667	0	0.000243092	0.000310398	0.000412839	0.000249314	0	0.00939859	7.43e-05	0	0.000249969	0	0.000495622	0.00404722	0	0.00372006	0.00655613	0.000895562
SR1_[G-1]	0.00193538	3.55e-05	0.000241274	0	0.0336608	0	0.00582946	0	0.00621693	0	0.0220437	0.000507835	0	0	0.00265482	0	0	0	0	0	0.00189735	0	0.000128353	0	0.00399353	0.00196934	0	0.000162061	0.000724263	0.00134173	0.00423835	0	0.00287607	0	0.00749261	0.0063742	0.00846702	8.26e-05	0.00134907	0	0.00285556	0.00365629	0.00206312
TM7_[G-1]	0.00096769	0	0.00715779	0	0	0	0.0123506	4.11e-05	0.00205026	0	0.000560433	0.00507835	0	0	0.00016254	0	0	0.000937427	0.000341297	0	9.49e-05	0.000220523	0.00128353	0	0.000760673	0.00682234	0	0.00113443	0.000310398	0.0102178	8.31e-05	0.00125691	0.0511016	0.000371609	0.00433783	0.000249969	0.000222816	0.000991244	0.00123665	0.00127078	0.00279036	0.00148237	0.00430906
Propionibacterium	0.000268803	0.000177607	0.000321699	0.00107197	0.000256301	0.000753093	0.00197609	0.00706598	0.000661376	0	0.000124541	0.00536854	0.024377	0.000295893	0.00130032	0	0.00161597	0.00134755	0.000227531	8.62e-05	0.000284603	0.000808586	0	0	0.000380337	0.00808834	0	0.00121546	0.000103466	0.000619259	8.31e-05	0.0367019	0.00482769	0	0.000525797	0	0.00311943	8.26e-05	0.00168634	0	0.00264558	0.00236482	0.00306538
Atopobium	0.000161282	0.000745951	0.000241274	0.00114343	8.54e-05	0	0.000988045	8.22e-05	0.0296296	0.000117247	0.000124541	0.00573128	0.00163239	0	0.00043344	0	0.00693916	0.00369112	0.00125142	0	9.49e-05	7.35e-05	0.000641766	0.000246245	0	0	0.0192839	0.000243092	0.00175892	0.00010321	0	0	5.14e-05	0.00654032	0.000591522	0.000249969	0	0.0123906	0	0.00826009	0.00258818	0.00264989	0.00265445
Proteus	0	0	0	0	0	0	0	0	0	0	0	0	0	0.0885904	0	0.0020262	0	0	0	0	0	0	0	0	0	0	0	0	0	0	0	0	0	0	0	0	0	0	0	0	0.00226541	0.00453083	0
Eikenella	0.000537606	0	0.00128679	0.00150075	8.54e-05	0.0121571	0.00316174	0.00673733	0.00634921	0	0	0.0066744	0.00391773	0.0201207	0.00119196	0	0.00104563	0	0.00159272	0	0	0.000220523	0.00744449	0	0.00123609	0.000422	0	0	0	0.000309629	0	0	0.00066766	0	0.011699	0.00056243	0	8.26e-05	0.000674536	0	0.00224195	0.00331795	0.00122731
Escherichia	0	0	0	0	0	0	0	0.061663	0	0.00293118	0	0.0069646	0	0	0	0.0118677	0	0	0	0	0	0	0	0	0	0	0	0	0	0	0.000332419	0	0	0	0	0	0	0	0	0	0.00209397	0.00417132	1.74957e-05
Solobacterium	0.000806408	0.00259307	0.000321699	0	0	0	0.000197609	0.00304001	0.00112434	0	0.000934056	0.00660186	0.0180107	5.92e-05	0.00010836	7.24e-05	0	0.00240216	0.0361775	0	0	0	0	0	9.51e-05	0	0.000514238	0.000243092	0.000827729	0.00010321	8.31e-05	0.000251383	0	0.000891862	0	0.000437445	0.000445633	0.00107385	0.000112423	0.00423594	0.00204411	0.00362247	0.000490263
Tannerella	0.000537606	0.000142086	0	0.000285857	0	0	0.00296413	0.000492975	0.00251323	0	0.00136995	0.000290192	0.00489716	0	0.00097524	0.000144728	0	0.000351535	0.000227531	0	0	7.35e-05	0.000128353	0	0.00560996	0.004009	0	0	0	0.000309629	0	0.00611698	0.0375944	0.000445931	0.00341768	0.000374953	7.43e-05	0.000660829	0.00202361	0	0.00190078	0.000759611	0.00320206
Lautropia	0.000268803	0	0	0	0	0.0013986	0	0.000369731	0.00026455	0	0	0.000217644	0.010012	0	0.00086688	0	0	0	0.00039818	0	0.000474338	0.00727727	0	0	0.00218694	0.00675201	0.00218551	8.1e-05	0.000206932	0.00175457	8.31e-05	0.00469247	0.0225464	7.43e-05	0.00276043	0.000187477	0	0.00107385	0.00629567	0.000211797	0.00181601	0.000689818	0.00307209
Lachnoanaerobaculum	0.000268803	0.000781472	0.000160849	0.000285857	0.000170867	0	0.000395218	0.000903788	0.00026455	0	0.000249082	0.00268427	0	0	0.00119196	0	0.00104563	0.00456995	5.69e-05	0.00551843	0	0	0.000513413	4.92e-05	0.000570505	0.00858067	0.000899916	0	0.00186239	0.00020642	0.000831048	0.0170102	0.00215705	0.00230398	0.00170884	0.00106237	0.00802139	0.00330415	0.00213603	0.00243567	0.00180502	0.000927382	0.00282386
Bacteroides	0	0	0	0	0.000854336	0	0	0	0.0325397	0	0.00909147	0.0201683	0	5.92e-05	0	0	0	0.00468713	0	0	0	0	0	0	9.51e-05	0	0	0	0	0	0	0	0	0	0	0	0	0	0	0	0.00168738	0.00337001	5.00526e-06
Corynebacterium	5.38e-05	0	8.04e-05	0	0	0	0.000988045	0.000123244	0.000529101	0	0.000186811	0.000362739	0.000435303	0	0.00016254	0	0	0	0	0	0	0.000294031	0	0	0.00332795	0.0387537	0	0.000567215	0	0.0010321	0	0.00217865	0.00862822	0	0.000657246	0	0.000445633	0.000330415	0.00584598	0	0.00162458	0.000146099	0.00326637
Salmonella	0	0	0	0	0	0	0	0	0	0.0624927	0	0	0	0	0	0	0	0	0	0	0	0	0	0	0	0	0	0	0	0	0	0	0	0	0	0	0	0	0	0	0.00156232	0.00312463	0
Lachnospiraceae_[G-2]	0	0.000177607	0.000643397	0	0.000341734	0	0	0	0.00026455	0	0.000186811	0	0	0	0.0485453	0	0	0.00111319	0	0.00206941	0	0	0	0	0	0	0	8.1e-05	0	0.00010321	0	0	0	7.43e-05	0.00276043	6.25e-05	0	0	0	0	0.00141059	0.0026671	0.000162181
Lachnospiraceae_[G]	0.000268803	0	0.000160849	0	0.00205041	0	0.00256892	0	0.00178571	0	0.000124541	0	0	0	0	0	0.0374525	0.00275369	0	0	9.49e-05	0	0	0	9.51e-05	0.000140667	0	0.000324123	0	0	0	0.00243003	0	0	0.004535	0	0	8.26e-05	0.0010118	0	0.00139699	0.00235827	0.000453649
Fusobacteria_[G-1]	0	0	0	0	0.0343443	0	0	0	0.00026455	0	0	0	0	0.000650965	0	0	0	0.00240216	0	0	0	0	0	0	0	0	0.000192839	0.00267401	0	0.000309629	0	0	0	0.00401338	0	0.000374953	0	0.00611267	0	0	0.00128349	0.0018831	0.000719868
Fretibacterium	0	7.1e-05	0.00249316	0	0.0288765	0	0.000296413	0	0.00191799	0	0.000311352	7.25e-05	0	0	0	0	0.00304183	0.00134755	0	0	0	0	0	0	0	0	0	0.000324123	0	0	0	0	0	0.000966184	0.00847847	0	0	8.26e-05	0.00191119	0	0.00125477	0.00192142	0.000619083
Stomatobaculum	0	0	0.00168892	0.00228686	0	0	0	0.00123244	0.00132275	0	0	0.00116077	0	0	0	0	0	0.00123037	0.000511945	0.000689804	0	0	0.00821461	9.85e-05	0	7.03e-05	0.000771357	0.000162061	0.00144853	0.00020642	8.31e-05	0.0113122	0	0.00468227	0	0.000937383	0.000519905	0.00140426	0.000224845	0.00921317	0.00123682	0.000506193	0.002071
Selenomonas	5.38e-05	0.00131429	0.000241274	0.000571714	0.00239214	0	9.88e-05	0.000123244	0.00125661	0	0.0151317	0.000290192	0.00103385	0	0.0005418	0	0.000570342	0.00673775	0.000625711	4.31e-05	0	0	0	0	0	0.00844001	0	8.1e-05	0	0	0	0	0.00241385	0	0.00473217	0	0	0.000165207	0.000112423	0.000105899	0.00117692	0.00155132	0.000844766
Clostridiales_[F-1][G-1]	0	0	0	0	0.0355404	0	0.00138326	0	0.00145503	0	0.000124541	0	0	0	0.00097524	0	0.000380228	0.00404265	0	0	0	0	0	0	0	0	0	0.000405154	0	0	0	0	0	0	0.00105159	0	0	0.000165207	0.00146149	0	0.00117462	0.00219507	0.000162287
Citrobacter	0	0	0	0	0	0	0	0	0	0.0443194	0	0	0	0	0	0	0	0	0	0	0	0	0	0	0	0	0	0	0	0	0	0	0	0	0	0	0	0	0	0	0.00110798	0.00221597	0
Peptostreptococcaceae_[XI][G-7]	5.38e-05	0	0	0	0.00794532	0.000430339	0.000197609	0	0.00145503	0	0.00479482	0.000870575	0.000544129	0	0.0199924	0	0	0.00158191	0	4.31e-05	0	0	0	0	0	0.000281334	0	0	0	0	0	0	0	0	0.00407493	0	7.43e-05	0	0.000224845	0	0.00106411	0.00189545	0.000245021
Peptostreptococcus	0.000268803	0.00671356	0	0.000643179	0.00170867	0.000537924	0.00148207	0.000903788	0.00125661	0.000468988	0.00298898	0.00413523	5.44e-05	0.000177536	0.00200466	0	9.51e-05	0.0032224	0.0102389	0	0	0	0	0	0.000190168	0	0	0.000162061	0	0	0	0	0.000205434	7.43e-05	0.000131449	0.000124984	0	0	0.000112423	0	0.000947541	0.00184504	5.26747e-05
Peptoniphilus	0	0.00024865	0	0	0	0	0	0	0	0	0.000124541	0	0.000217652	0	0	0	0.0348859	0.00070307	0	0	0	0	0	0	0	0	0	0	0	0	0	0	0	0	0	0	0	0	0	0	0.000904496	0.00180899	0
Staphylococcus	0.000107521	0	0.000160849	0.000214393	0	0.012695	0.000197609	0	0	0	0	0.000725479	0	0.00147946	0	0.0164267	0.000285171	0.000117178	0	0	0	0.000220523	0	0	0	0.000984667	0	0	0	0	0	0.00201106	0	0	0	0	7.43e-05	0	0.000449691	0	0.000903739	0.00162047	0.000196855
Cardiobacterium	0.000161282	0	0	0	0	0	0.000197609	0.000410813	0.000859788	0	6.23e-05	0	0.000326477	0	0.00021672	0	0	0	0	0	0	0	0	0	0.0023771	0.025531	0	0	0	0	0	0.000167588	0.00405732	7.43e-05	0.000197174	0	0	0.000247811	0.00123665	0	0.000903099	0.000111749	0.00178363
Bacteroidetes_[G-5]	0	0	0	0	0.000939769	0	0	0	0	0	0.0101501	0.000145096	0	0	0.00931896	0	0.000190114	0.0065034	0	0	0	0	0	0	0	0	0	0	0	0	0	0	5.14e-05	0	0.00650674	0	0	0.000165207	0.000224845	0	0.00085489	0.00136237	0.000365694
Ralstonia	0	0.00813441	0	0	0	0	0	0.0228412	0	0	0	0	0.000435303	0	0	0	0	0	0	0	0	0	0	0	0	0	0	8.1e-05	0	0	0.0016621	0	0	0	0	0	0	0	0	0	0.00082885	0.00157054	9.17419e-05
TM7_[G-6]	0.000107521	0	0.00128679	0	0.000170867	0	0	0.000287569	6.61e-05	0	0	0.00391759	0.000163239	0	0	0	9.51e-05	0	5.69e-05	0	0.00180249	0.0130109	0	0	0.000475421	0	0	0.00672555	0.000827729	0.00268345	0	0	0	0	0	6.25e-05	0.000148544	8.26e-05	0.000674536	0.000317696	0.000824077	0.000307584	0.00131626
Ottowia	5.38e-05	0	0	0	0	0	0	0.00903788	0.00925926	0	0	0	0.00103385	0	0.00113778	0	0	0	0	0	0	0	0	0	0.00732148	0.000211	0	8.1e-05	0	0	0.000249314	0	0	0	0	0	0	0	0.00326026	0.000105899	0.000793788	0.00102613	0.000590997
Lachnospiraceae_[G-7]	0	0.000106564	0.000241274	0	0.000598035	0	0	0	0.0265212	0	0.000435893	0.000290192	0	0	0	0	0	0.000292946	0.000910125	0	0	0	0	0	0	0	0	0	0	0	0	0	0	0	0.000131449	0	0	0	0	0	0.000738191	0.00146981	6.91837e-06
Filifactor	5.38e-05	0.00454675	0.000160849	0	0.00299017	0	0	0	0.000462963	0	0.000871785	7.25e-05	0	0	0.00769356	0	0	0.00691352	0	0	0	0	0	0	0	0	0	0.000324123	0	0	0	0	0	0.000371609	0.00262898	0	0	0.000165207	0.000786959	0	0.00070107	0.00118829	0.000225099
Abiotrophia	0.000161282	0	0	0.000643179	0	0.000537924	0	8.22e-05	0	0	0	0.00246663	0.000163239	5.92e-05	0	0	0	0.000175768	5.69e-05	0	9.49e-05	0.00220523	0.000128353	0	0.000475421	7.03e-05	0	8.1e-05	0	0.0173393	0	0	0.00112988	0	0	6.25e-05	0	0	0.000674536	0	0.000665193	0.000217316	0.00116666
Sphingomonas	0	0.000852515	0	0.000357322	0	0	0	0.000780544	0.00026455	0	0	0	0	0.000118357	0	0.000796005	0	0.000410124	0	0	0	0	0	0	0	7.03e-05	0.000128559	8.1e-05	0	0	0	0.0214513	0	0	0	0	0	0	0	0	0.000632765	0.000178971	0.00114375
Bacteroidales_[G-2]	0.000806408	0	0	0	0	0.000322754	0	0	0.00588624	0	0.000747245	0.000145096	0.00429862	0	0.00037926	0	0	0	0	0	0	0	0.000128353	0	0.00275744	0.00182867	0	0	0	0	0	0	0.00554671	0	0.00085442	0	0	0	0.000562114	0	0.000606583	0.000629281	0.000614616
Klebsiella	0	0	0.000482548	0	0	0	0	0	0	0.0206355	0	0	0	0.000710143	0	0	0	5.86e-05	0	0	9.49e-05	0	0	0	0	0	0	0	0	0	0	0	0	0	0	0	0	0	0.000112423	0	0.000552352	0.00109434	5.917e-06
Mogibacterium	0	0.000284172	0.000723822	0	0.00162324	0	0.00108685	0.000410813	0.00218254	0.000117247	6.23e-05	0.00123331	0.0016868	0	0.00043344	0	0.00228137	0.00169909	0.000284414	0	9.49e-05	0	0	0	9.51e-05	0	0.00102848	0.000162061	0.000310398	0.00010321	0	0	0	0.0017094	0.000262898	0	0	0.000826037	0.000224845	0.00232977	0.000531412	0.00070547	0.000371168
Lachnospiraceae_[G-3]	5.38e-05	0.000142086	0	0	0	0	0.000790436	0	0.000595238	0	0.000124541	0.000145096	0	0	0.00043344	0	0	0.00187485	0	0	0	0	0.000128353	0	0.00275744	0.003587	0	0	0	0	0	0.00410592	0.00446818	0	0	0.000187477	0.000148544	0	0.00157392	0	0.000527908	0.000207975	0.000892465
Johnsonella	0	0	0	0	0	0	0	0	6.61e-05	0	0	0	0	0	5.42e-05	0	0	0.00339817	0	0	0	0	0	0	0	0	0	0.000324123	0	0	0	0	5.14e-05	0	0.0157082	6.25e-05	0	8.26e-05	0.000449691	0	0.000504924	0.000175924	0.000877816
Lactococcus	0	0	0	0	0	0	0	0	0	0.019463	0	0	0	0	0	0	0	0	0	0	0	0	0	0	0	0	0	0	0	0	0	8.38e-05	0	0	0	0	0	0	0	0	0.00048867	0.00097315	4.41053e-06
Erwinia	0	0	0	0	0	0	0	0	0	0.0193458	0	0	0	0	0	0	0	0	0	0	0	0	0	0	0	0	0	0	0	0	0	0	0	0	0	0	0	0	0	0	0.000483644	0.000967288	0
Ruminococcaceae_[G-1]	0	0	0	0	0	0	0	0	0	0	0	0	0	0	0	0	0	0.0146473	0	0	0	0.000882094	0	0	0	7.03e-05	0	0.000162061	0.000310398	0	0	0	0	0	0.000197174	0.000249969	0.00193107	0	0	0	0.000461259	0.000732365	0.000200162
Finegoldia	0	0	0	0	0	0	0	0	0	0.000703482	0	0.00203134	0.000163239	0.000177536	0	0	0.0143536	0.000410124	0	0	0.000284603	0	0	0	0	0	0	0	0	0	0	0	0	0	0	0	0.000148544	0	0	0	0.000456812	0.000891967	7.81811e-06
Citrobacter	0	0	0	0	0	0	0	0	0	0.0166491	0	0.000217644	0	0.000236714	0	7.24e-05	0	0	0	0	0	0	0	0	0	0	0	0	0	0	0	0	0	0	0	0	0	0	0	0	0.000429396	0.000858792	0
Enterococcus	0	0	0	0	0	0	0	0	0	0.0133662	0	0	0	0.00153864	0	7.24e-05	0.00095057	0	0	0	0	0	0	0	0	0	0	0	0	0	0	0	0	0	0	0	0	0	0	0	0.000398194	0.000796389	0
Leuconostoc	0	0	0	0	0	0	0	0	0	0.0157111	0	0	0	0	0	0	0	0	0	0	0	0	0	0	0	0	0	0	0	0	0	0	0	0	0	0	0	0	0	0	0.000392778	0.000785555	0
TM7_[G-5]	0	0	0.00595142	0	0	0	0	0	0	0	0.000249082	0	0	0	0	0	0	0	0	0	0	0	0	4.92e-05	0	0	6.43e-05	0	0	0	0	0	0.00200298	0.00178372	0.000197174	0.000937383	0	0.000578226	0.00112423	0.000317696	0.000331385	0.000310025	0.000371311
Ruminococcaceae_[G-2]	0	0	0	0.000214393	0	0	0.000592827	0	0.00026455	0	0.000124541	0.000580383	0	0	0	0	0	0.000117178	0	0	0	0	0.00154024	0	0	0.000914334	0.000449958	0	0.000206932	0	8.31e-05	0	0.000873093	0.00133779	6.57e-05	0.00056243	0.00148544	0	0	0.00381235	0.000330631	9.46936e-05	0.000596388
GN02_[G-1]	0	0	0	0	0	0	0	0	0	0	0.000186811	0	0	0	0	0	0	0	0	0	0	0	0	0	0	0.002321	0	0	0	0	0	0	0.00939859	0	0	0	0.000445633	0	0.000786959	0	0.000328475	9.34055e-06	0.000681694
Afipia	0	0.000284172	0	0	0	0	0	0.00242379	6.61e-05	0	0	7.25e-05	0.0046251	0	0	0.000289457	0	0	0	0	0	0	0	0	0	0	0	0	0	0	0	0.002849	0	0	0	0	0	0	0	0	0.000265253	0.000388056	0.000149948
Acinetobacter	0.000107521	0	0.000643397	0.000214393	0	0.00118343	0.00118565	0	0.000727513	0	0	0.000145096	0	0	0.00281736	0	0.000285171	5.86e-05	0	0	0.000379471	0	0	0	0	0	0	0	0	0	0	0.0014245	0	0	0.000131449	0	7.43e-05	0	0.000112423	0	0.000237257	0.000368407	9.17196e-05
Corynebacterium	0	3.55e-05	0	0.00164368	8.54e-05	0	0	4.11e-05	0.000132275	0	0	0.000145096	0.000544129	0.000236714	0.00016254	0	0	0	0	0	0	0.000220523	0	0	0	7.03e-05	0	0	0.000103466	0.00010321	0	0.00418971	5.14e-05	0	0	0	0.000222816	0.000165207	0.000562114	0	0.000217879	0.000151322	0.000299408
Peptostreptococcaceae_[XI][G-1]	0	7.1e-05	0	0	0	0	0	0.000246488	0.000198413	0	0.000249082	0.000435287	0.000217652	0	0	0	9.51e-05	0.00117178	0.000170648	0	0	0	0	0	0	0	0	0	0.000206932	0	0	0	0	0.000445931	0	0	0.000297089	0.000330415	0.000224845	0.00423594	0.000214915	0.000142773	0.000302166
Cupriavidus	0	0.00305485	0	0	0	0	0	0.00509408	0	0	0	0	0	5.92e-05	0	0	0	0	0	0	0	0	0	0	0	0	0	0	0	0	0	0	0	0	0	0	0	0	0	0	0.000205203	0.000410406	0
Betaproteobacteria_[G]	0	0	0	0	0	0	0	0	0	0	0	0	0	0	0	0	0.00247148	0	0	0	9.49e-05	0	0	0	0	0	0	0	0	0	0	0.00511145	0	0	0	0	0	0	0.000224845	0	0.000197567	0.000123574	0.000280857
Pyramidobacter	0	0.000284172	0	0.000142929	0	0	0	0	0	0	0	0	0	0	0	0	0	0.0070307	0	0	0	0	0	0	0	0	0	0.000243092	0	0	0	0	0	7.43e-05	0	0	0	0	0	0	0.00019438	0.00037289	1.67048e-05
Manihot	0	0	0	0	0	0.000430339	0	0	0.00145503	0.000234494	0	0	0	5.92e-05	0	0	0	0	0	0	0	0	0	0	0	0	0.000835637	0.000486184	0	0	0	0.00393833	0	0	0	0	0	0	0	0	0.00018598	0.000108953	0.00027685
Megasphaera	0	0	0.00128679	0.000142929	0	0	0.000296413	0	0.000198413	0	0	0.000145096	0	0	0	0	0.00342205	0.000117178	5.69e-05	0	0	0	0	0	0	0	6.43e-05	0	0	0	0	0	0	0.000445931	6.57e-05	0	0	8.26e-05	0	0.000635391	0.000173992	0.000283289	6.81012e-05
Alloscardovia	0.000268803	0	0	0.00343029	0	0.000322754	0.00207489	0	0	0	0	0.000217644	0	0	0	0	0	0.000234357	5.69e-05	0	0	0	0	0	0	0	0.000257119	0	0	0	0	0	0	0	0	0	0	0	0	0	0.000171569	0.000330282	1.35326e-05
Methylobacterium	0.000430084	0.00145638	0	0.00228686	0	0	0	0.0026292	0	0	0	0	0	0	0	0	0	0	0	0	0	0	0	0	0	0	0	0	0	0	0	0	0	0	0	0	0	0	0	0	0.000170063	0.000340126	0
Bulleidia	0.000107521	0.0062873	0	0	0.000256301	0	0	0	0	0	0	0	0	0	0	0	0	0	0	0	0	0	0	0	0	0	0	0	0	0	0	0	0	0	0	0	0	0	0	0	0.000166278	0.000332556	0
Diaphorobacter	0	0	0	0	0	0	0	0	0	0	0	0	0	0	0	0	0	0	0	0	0	0	0	0	0	0	0	0.000162061	0	0.00010321	0	0.00544662	0	0	0	0	0	0	0.000562114	0	0.00015685	0	0.000330211
Kocuria	0.000107521	0	0	0.000214393	0	0	0	0	0	0	0	0	0	0	0	0	0	0.000117178	0	0	0	0	0	0	0	0	0	0	0	0	0	0.0057818	0	0	0	0	0	0	0	0	0.000155522	2.19546e-05	0.000304305
Bacteroidetes_[G-3]	0	0.000461779	8.04e-05	0	0	0	0	0	0.000529101	0	0.000311352	0	0	0	0	0	0	0.00187485	0	0	0	0	0	0	0	0	0	0	0	0	0	0	0	0	0.00243181	0	0	0.000165207	0.000337268	0	0.000154794	0.000162874	0.000154436
Paracoccus	0	0	0	0	0	0.000322754	0	0	0	0	0	0.000217644	0	0	0	0	0	0	0	0	0	0.00169068	0	0	0	0	0	0.000162061	0	0	0	0.00351936	0	0	0	0	0	0	0	0	0.000147812	2.70199e-05	0.000282742
Stenotrophomonas	0.000215042	0	0	0	0	0	0.00237131	0	0.00119048	0	0	0	0	0	5.42e-05	7.24e-05	0	5.86e-05	0	4.31e-05	0	0	0	0	0	0	0	0	0	0	0	0.00167588	0	0	0	0	7.43e-05	0	0.000112423	0	0.000146693	0.000200256	9.80319e-05
Lachnospiraceae_[G-8]	0	0.000213129	0	0	0.000341734	0	0	0	0.000396825	0	0.00161903	0.000145096	0	0	0.00010836	0	0	0.000527303	0	0	0	0	0	0	0	0	0	8.1e-05	0	0	0	0	0	0.000148644	0.00164311	0	7.43e-05	0.000165207	0.000337268	0	0.000145025	0.000167574	0.000128923
Alphaproteobacteria_[G]	0	0.000177607	0	0	0.000256301	0	0	0	0.00224868	0	0	0.000362739	0	0	0	0	0	0.00275369	0	0	0	0	0	0	0	0	0	0	0	0	0	0	0	0	0	0	0	0	0	0	0.000144975	0.000289951	0
Delftia	0.000161282	0.000106564	0	0.00128636	0	0	0.00128446	0.0006573	0	0	0	7.25e-05	0	0	0	7.24e-05	0.000570342	5.86e-05	0	0	0	7.35e-05	0	0	0	0	0	8.1e-05	0	0	0	0.00117312	0	0	0	0	7.43e-05	0	0	0	0.000141793	0.00021349	7.37852e-05
Mollicutes_[G-1]	0	0	0	0	0.00563862	0	0	0	0	0	0	0	0	0	0	0	0	0	0	0	0	0	0	0	0	0	0	0	0	0	0	0	0	0	0	0	0	0	0	0	0.000140965	0.000281931	0
Porphyrobacter	0	0	0	0	0	0.000968263	0	0	0	0	0	0	0	0	0	0	0	0	0	0	0	0	0	0	0.000285252	0	0	0	0	0	0	0.00418971	0	0	0	0	0	0	0	0	0.000136081	4.84132e-05	0.000235524
Streptobacillus	0.000430084	0	0.00193019	0	0.0010252	0	0	0	0.00119048	0	0	7.25e-05	0	0	0	0	0	0	0.000682594	0	0	0	0	0	0	0	0	0	0	0	0	0	0	7.43e-05	0	0	0	0	0	0	0.000135134	0.000266552	3.91053e-06
GN02_[G-2]	0.000268803	0	0	0	0.00170867	0	0	0	0.00185185	0	6.23e-05	0	0	0	0.0005418	0	0	0	0	0	0.000189735	7.35e-05	0	0	0	0.000422	0	0	0	0	8.31e-05	0	0	0	0	0	0	0	0.000112423	0	0.000132855	0.000221671	3.63696e-05
Peptostreptococcaceae_[XI][G-9]	0.00107521	0	0	0	8.54e-05	0.000645508	0	0	0	0	6.23e-05	0.000290192	0	0	0	0	0	0	0	0	0	0	0	0	0	0	6.43e-05	0.000324123	0	0	0	0	0	7.43e-05	0.00243181	0	0	0	0	0	0.000126329	0.000107931	0.000152344
TM7_[G-4]	0	0	0	0	0	0	0	0	0	0	0	0	0	0	0.00498456	0	0	0	0	0	0	0	0	0	0	0	0	0	0	0	0	0	0	0	0	0	0	0	0	0	0.000124614	0.000249228	0
Bradyrhizobium	0	0.000142086	0	0	0	0	0	0.00324542	0	0	0	0	0.000707368	0	0	0	0	0	0	0	0	0	0	0	0	0	0.000128559	0	0	0	0	0.000502765	0	0	0	0	0	0	0	0	0.000118155	0.000204744	3.32276e-05
Microbacterium	0	3.55e-05	0	0	0	0	0	0.000205406	0	0	0	0	0	0	0	0	0	0	0	4.31e-05	0	0	0	0	0	0	0.000449958	0	0.000310398	0	0.00016621	0	0	0.0017094	0	6.25e-05	0	0.000495622	0.000449691	0.000423594	0.000108785	1.42003e-05	0.000214072
Dialister	0.000107521	7.1e-05	0	0	0.000512601	0	0	4.11e-05	0.000396825	0	0	0	0	0	5.42e-05	0	0.00228137	0.000292946	5.69e-05	0	0	0	0	0	0	0	0	0	0	0	0	0	0	7.43e-05	0.000262898	0	0	0	0	0	0.000103791	0.000190723	1.77473e-05
Tatumella	0	0	0	0	0	0	0	0	0	0.0039864	0	0	0	0	0	0	0	0	0	0	0	0	0	0	0	0	0	0	0	0	0	0	0	0	0	0	0	0	0	0	9.966e-05	0.00019932	0
Kocuria	0	0	0	0.000357322	0	0.000215169	0.000691631	0	6.61e-05	0	0.000124541	0	0.000979432	0	0	0	0.000475285	5.86e-05	0	0.000129338	0	0	0	0	0	0	0.000128559	0.000243092	0	0	0	0.000418971	0	0	0	0	0	0	0	0	9.7201e-05	0.000154871	4.16117e-05
Arcobacter	0	0	0	0	0	0	0	0	0.00376984	0	0	0	0	0	0	0	0	0	0	0	0	0	0	0	0	0	0	0	0	0	0	0	0	0	0	0	0	0	0	0	9.4246e-05	0.000188492	0
Sphingobium	0	0.000106564	0	0	0	0	0	0.000575138	0	0	0	0	0	0	0	0	0	0	0	0	0	0	0	0	0	0	0	0	0	0	0	0.00301659	0	0	0	0	0	0	0	0	9.24573e-05	3.40851e-05	0.000158768
Peptostreptococcaceae_[XI][G-2]	5.38e-05	0.000639386	0	0	0.000598035	0.000322754	0	0	0	0	0.000186811	0	0	0	0.0005418	0	0	0.000761659	0.000455063	0	0	0	0	0	0	0	0	0	0	0	0	0	0	0	0.000131449	0	0	0	0	0	9.22689e-05	0.000177965	6.91837e-06
Micrococcus	0	0	0	0	0	0.000860678	9.88e-05	0.00119136	0	0	0	0	0	0.000118357	0	7.24e-05	0	0.000234357	0	8.62e-05	0	0	0	0	0	0	0	8.1e-05	0	0.00010321	0	0.000837942	0	0	0	0	0	0	0	0	9.21075e-05	0.000133107	5.37975e-05
Shuttleworthia	0	3.55e-05	0	0	0	0	0	0	0.00244709	0	0.000186811	0	0	0	0	0	0	0.000585892	0.000113766	0	0	0	0	0	0	0	0	8.1e-05	0	0	0	0	0	0	0	0	0	0	0	0	8.62515e-05	0.000168453	4.26316e-06
Schlegelella	0	0	0	0	0	0	0	0	0	0	0	0	0	0	0	0	0.000475285	0	0	0	0	0	0	0	0	0	0	0	0	0	0	0.002849	0	0	0	0	0	0	0.000112423	0	8.59178e-05	2.37642e-05	0.000155865
Calycanthus	0	0	0	0	0	0	0	0	0	0	0	0	0	0	0	0	0	0	0	0	0	0	0	0	0	0	0	8.1e-05	0	0	0	0.002849	0	0	0	0	0	0	0	0	7.32501e-05	0	0.000154211
Clostridiales_[F-1][G-2]	0	0	0	0	0	0	0	0	0	0	0	0	0	0	0	0	0	0.00251933	0	0	0	0	0	0	0	0	0	0	0	0	0	0	0	0	0	0	0	0	0	0	6.29834e-05	0.000125967	0
Peptostreptococcaceae_[XI][G-4]	0.000215042	0.000142086	0	0	0.000683469	0	9.88e-05	0	0	0	0	0	0	0	0.00010836	0	9.51e-05	0.000410124	0	0	0	0	0	0	0	0	0	0	0	0.00010321	0	0	0	0	0.000460072	0	0	8.26e-05	0	0	5.99716e-05	8.76491e-05	3.39938e-05
Peptostreptococcaceae_[XI][G-5]	0	0	0	0	0	0	0	0	6.61e-05	0	6.23e-05	0	0	0	0	0	9.51e-05	0	0	0	0	0	0	0	0	0	0	0	0	0	0	0	0	7.43e-05	0.00164311	0	0	0	0.000224845	0	5.4144e-05	1.1175e-05	0.000102224
Actinomycetales_[G]	0	0	0	0	0	0	0	0	0	0	0	0	0	0	0	0	0	0	0	0	0	7.35e-05	0	0	0	0	0	0	0	0	0	0.00184347	0	0	0	0	0.000222816	0	0	0	5.34947e-05	0	0.00011262
Lactobacillus	0	0	0.00120637	0	0	0.000430339	0.000197609	0	0.000132275	0	0	0	5.44e-05	0	0	7.24e-05	0	0	0	0	0	0	0	0	0	0	0	0	0	0	0	0	0	0	0	0	0	0	0	0	5.23348e-05	0.00010467	0
Morganella	0	0	0	0	0	0	0	0	0	0	0	0	0	0.000177536	0	0.00188147	0	0	0	0	0	0	0	0	0	0	0	0	0	0	0	0	0	0	0	0	0	0	0	0	5.14751e-05	0.00010295	0
Burkholderia	0	0.0004973	0	0	0	0	0	0.00147893	0	0	0	0	0	0	0	0	0	0	0	0	0	0	0	0	0	0	0	0	0	0	0	0	0	0	0	0	0	0	0	0	4.94056e-05	9.88112e-05	0
Sphingopyxis	0	0.000319693	0	0	0	0	0	0.00164325	0	0	0	0	0	0	0	0	0	0	0	0	0	0	0	0	0	0	0	0	0	0	0	0	0	0	0	0	0	0	0	0	4.90736e-05	9.81472e-05	0
Meiothermus	0	0	0.000804246	0	0	0.000645508	0	0	0.000330688	0	0	0	0	0.000177536	0	0	0	0	0	0	0	0	0	0	0	0	0	0	0	0	0	0	0	0	0	0	0	0	0	0	4.89494e-05	9.78989e-05	0
Bifidobacterium	0	0	0	0	0	0	0	0	0	0	0	0	0.000163239	0	0	0	9.51e-05	0.000468713	0	4.31e-05	0	0	0	0	0	0	6.43e-05	0.000162061	0	0	0	0.000167588	0	0	0.000722971	0	0	0	0	0	4.71768e-05	3.85076e-05	5.87853e-05
Peptostreptococcaceae_[G]	0	0.00124325	0	0	0	0	0	0	0	0	0.000124541	7.25e-05	0	0	0	0	0	0.000410124	0	0	0	0	0	0	0	0	0	0	0	0	0	0	0	0	0	0	0	0	0	0	4.62604e-05	9.25208e-05	0
Peptococcus	5.38e-05	0	0	0	0.000768902	0	0	0	0	0	0.000124541	0	0	0	0.00010836	0	0	0.000644481	0	0	0	0	0	0	0	0	0	0	0	0	0	0	0	0	0	0	0.000148544	0	0	0	4.62157e-05	8.50042e-05	7.81811e-06
Altererythrobacter	0	0	0	0	0	0	0	0	0	0	0	7.25e-05	0	0	0	0	0	0	0	0	0	0	0	0	0	0	0	0	0	0	0	0.00175968	0	0	0	0	0	0	0	0	4.58045e-05	3.625e-06	9.26146e-05
Olsenella	0	0	0.000160849	0	0	0	0	0	6.61e-05	0.000117247	0	0	0.000163239	0	0	0	0	0.0010546	0	0	0	0	0	0	0	0.000140667	0	0	0	0	0	0	0	0	6.57e-05	0	0	0	0	0	4.42102e-05	7.8102e-05	1.08614e-05
Burkholderiales_[G]	0	0	0	0	0	0	0.000395218	0	0	0	0	0	0	0	0	0	0	0	0	0	0	0	0	0	0	0	0	0	0	0	0	0.00134071	0	0	0	0	0	0	0	0	4.33981e-05	1.97609e-05	7.05635e-05
Propionibacterium	0	0	0	0	0	0	0	0	0	0	0	0.000725479	0	0	0	7.24e-05	0	0	0	0	0	0	0	0	0	0	0	0	0	0	0	0.000754148	0.000102717	0	6.57e-05	0	0	0	0	0	4.30111e-05	3.9894e-05	4.85561e-05
TM7_[G-3]	0	0	0	0	0	0	0	0	6.61e-05	0	0	0	0	0	0	0	0	0	0.000113766	0	0	0	0.000641766	0	0	0	0	0	0.000103466	0	0	0	5.14e-05	0.000148644	0	0	0	0	0	0.000423594	3.87184e-05	8.9933e-06	7.20458e-05
Comamonas	0	0	0	0	0	0	0	0	0	0	0	0	0	0	0	0	0	0	0	0	0	0	0	0	0	0	0	0	0	0	0	0.0015083	0	0	0	0	0	0	0	0	3.77074e-05	0	7.9384e-05
Peptostreptococcaceae_[XI][G-6]	0	0.000177607	0	0	0	0	0	0	0	0	0	0	0	0	0	0	0	0.000937427	0	0	0	0	0	0	0	0	0	0	0	0	0	0	0	0.000148644	0.000131449	0	0	0	0.000112423	0	3.76888e-05	5.57517e-05	2.06587e-05
Massilia	0	0	0.000482548	0	0	0	0	0	0	0	0	0	0	0	0	0	0.000380228	0.000527303	0	8.62e-05	0	0	0	0	0	0	0	0	0	0	0	0	0	0	0	0	0	0	0	0	3.6907e-05	7.3814e-05	0
Dietzia	0	3.55e-05	0	0	0	0	0	0	0	0	0	0	0	5.92e-05	0	0	0	0.00134755	0	0	0	0	0	0	0	0	0	0	0	0	0	0	0	0	0	0	0	0	0	0	3.60563e-05	7.21126e-05	0
Veillonella	0	0	0	0	0	0	0	0	0	0	0	0	0	0	0	0	0	0	0	0	0	0	0	9.85e-05	0	0	6.43e-05	0	0.000103466	0.00010321	0	0	0	0.000371609	0	0	0	0.000578226	0	0.000105899	3.56302e-05	0	7.50111e-05
Scardovia	0	0	0	0	8.54e-05	0	0.000592827	8.22e-05	0	0	0	0.000145096	0	0	0	0	0	0	5.69e-05	0	0	0	0	0	0	0	0	8.1e-05	0	0	0	0	0	0	0	6.25e-05	0	0.000247811	0	0	3.38434e-05	4.81212e-05	2.05953e-05
Treponema	0	0	0	0	0.000939769	0	0.000197609	0	0	0	0	0	0	0	0	0	0	0	0	0	0	0	0	0	0	0	0	8.1e-05	0	0	0	0	0	0	0.000131449	0	0	0	0	0	3.37457e-05	5.68689e-05	1.11815e-05
Brevundimonas	0	0	0	0.000357322	0	0	0	0	0.000198413	0	0	0.000217644	0	0	0	0	0	0	0	0	0	0	0	0	0	0	0	0	0	0	0	0.000502765	0	0	0	0	0	0	0	0	3.19036e-05	3.8669e-05	2.64613e-05
Anaerolineae_[G-1]	0	0	0.000723822	0	0	0	0	0	0.00026455	0	0	0	0	0	0	0	0	0	0	0	0	0	0	0	0	0	0	0	0	0	0	0	0	0	6.57e-05	0	0	0.000165207	0	0	3.0482e-05	4.94186e-05	1.2153e-05
Peptoniphilaceae_[G-2]	0	0	0	0	0	0	0	0	0	0	0	0	0	0	0	0	0	0.00117178	0	0	0	0	0	0	0	0	0	0	0	0	0	0	0	0	0	0	0	0	0	0	2.92946e-05	5.85892e-05	0
Propionivibrio	0	0	0	0	0	0	0	0	0.000198413	0	6.23e-05	0	0	0	0	0	0	0	0	0	0	0	0	0	0	0.000140667	0	0	0	0	0	0	0.000770376	0	0	0	0	0	0	0	2.92939e-05	1.30356e-05	4.79496e-05
Candidatus_Phytoplasma	0	0	0	0	0	0	0	0	0.000132275	0	0	0	0	0	0	0	0	0.000996016	0	0	0	0	0	0	0	0	0	0	0	0	0	0	0	0	0	0	0	0	0	0	2.82073e-05	5.64146e-05	0
Rhodobacter	0	0	0	0	0	0	0	0	0	0	0	0	0	0.000118357	0	0	0	0	0	0	0	0	0	0	0	0	0	0	0	0	0	0.00100553	0	0	0	0	0	0	0	0	2.80972e-05	5.91785e-06	5.29226e-05
Mycobacterium	0	0	0	0	0	0	0	0	0	0	0	0	0	0	0	0	0	0	0	0	0	0	0	0	0	0	0	0	0	0	0	0.00108932	0	0	0	0	0	0	0	0	2.72331e-05	0	5.73329e-05
Erysipelotrichaceae_[G-1]	0	0	0	0	0	0	0	0	0.000198413	0	0	0	0	0	0	0	0	0.000761659	0	0	0	0	0	0	0	0	0	0	0	0	0	0	0	0	6.57e-05	0	0	0	0	0	2.56443e-05	4.80036e-05	3.45789e-06
Pedobacter	0	0	0	0.000214393	0	0	0	0	0	0	0	0	0	0	0	0	0	0	0	0	0	0.000294031	0	0	0	0	0	0	0	0	0	0.000502765	0	0	0	0	0	0	0	0	2.52797e-05	1.07196e-05	4.19366e-05
Pseudocitrobacter	0	0	0	0	0	0	0	0	0	0.000937976	0	0	0	0	0	0	0	0	0	0	0	0	0	0	0	0	0	0	0	0	0	0	0	0	0	0	0	0	0	0	2.34494e-05	4.68988e-05	0
Aeromonas	5.38e-05	0	0	0	0	0	0	0	0	0	0	0	0	0	0	0.00086837	0	0	0	0	0	0	0	0	0	0	0	0	0	0	0	0	0	0	0	0	0	0	0	0	2.30543e-05	4.61085e-05	0
Flavitalea	0	7.1e-05	0	0.000571714	0	0	0	0.000246488	0	0	0	0	0	0	0	0	0	0	0	0	0	0	0	0	0	0	0	0	0	0	0	0	0	0	0	0	0	0	0	0	2.223e-05	4.44601e-05	0
Veillonellaceae_[G-1]	0	0	8.04e-05	0	0	0	0	0	0	0	0	0	0	0	5.42e-05	0	9.51e-05	0.000117178	0	0	0	0	0	0	0	0	0	0	0	0	0	0	0.000102717	0	0.000328623	0	0	0	0	0.000105899	2.21029e-05	1.73439e-05	2.82757e-05
Peptoniphilaceae_[G-3]	0	0	0	0	0	0	0	0	0	0	0	0	0	0	0	0	0	0.000878838	0	0	0	0	0	0	0	0	0	0	0	0	0	0	0	0	0	0	0	0	0	0	2.1971e-05	4.39419e-05	0
Caulobacter	0	0	0.000160849	0	0	0	0	0	0	0	0	0	0	0	0	0	0	0	0	0	0	0	0	0	0	0	0	0	0	0	0	0.000670354	0	0	0	0	0	0	0	0	2.07801e-05	8.04245e-06	3.52818e-05
Chromobacterium	0	0	0	0	0	0	0	0	0	0	0	0	0	0	0	0	0	0	0	0	0	0	0	0	0	0	0	0	0.000310398	0	0.000498629	0	0	0	0	0	0	0	0	0	2.02257e-05	0	4.25804e-05
Anaerococcus	0	0	0	0	0	0	0	0	0	0	0	7.25e-05	0	5.92e-05	0	0	0	0	0	0	0	0	0	0	0	0	0	0	0	0	0	0.000167588	0	0	0	0	0.000148544	0	0.000337268	0	1.96275e-05	6.585e-06	3.43895e-05
Eggerthia	0	0.000355215	0	0	0	0	0	0	0	0	0	0	0	0	0	0	0	0.000351535	0	0	0	0	0	0	0	0	0	0	0	0	0	0	0	0	6.57e-05	0	0	0	0	0	1.93112e-05	3.53375e-05	3.45789e-06
Deinococcus	0	0	0	0	0	0.000430339	0	0	0	0	0	0	0	0	0	0	0	0	0	0	0	0	0	0	0	0	0	0.000324123	0	0	0	0	0	0	0	0	0	0	0	0	1.88615e-05	2.1517e-05	1.70591e-05
Simonsiella	0	0	0	0	0	0	0	0	0	0	0	0	0	0	0	0	0	0	0	0	0	0	0	0	0.000665589	7.03e-05	0	0	0	0	0	0	0	0	0	0	0	0	0	0	1.83972e-05	0	3.8731e-05
Clostridiales_[G]	0	0.000106564	0.000160849	0	8.54e-05	0	0	0	0	0	0	0	0	0	0	0	0	0.000175768	0	0	0	0	0	0	0	0	0	0	0	0	0	0	0	0	0.000197174	0	0	0	0	0	1.81439e-05	2.6429e-05	1.03776e-05
Morganella	0	0	0	0	0	0	0	0	0	0	0	0	0	0	0	0.000723641	0	0	0	0	0	0	0	0	0	0	0	0	0	0	0	0	0	0	0	0	0	0	0	0	1.8091e-05	3.61821e-05	0
Alcaligenes	0.000161282	0	0	0	0	0.000430339	9.88e-05	0	0	0	0	0	0	0	0	0	0	0	0	0	0	0	0	0	0	0	0	0	0	0	0	0	0	0	0	0	0	0	0	0	1.72605e-05	3.45211e-05	0
Sphaerobacter	0.000322563	0	0	0	0	0	0	0	0	0	0	0	0.000326477	0	0	0	0	0	0	0	0	0	0	0	0	0	0	0	0	0	0	0	0	0	0	0	0	0	0	0	1.6226e-05	3.2452e-05	0
Arthrobacter	0	0	0	0	0	0.000645508	0	0	0	0	0	0	0	0	0	0	0	0	0	0	0	0	0	0	0	0	0	0	0	0	0	0	0	0	0	0	0	0	0	0	1.61377e-05	3.22754e-05	0
Dolosigranulum	0	0	0	0.00050025	0	0	0	0	0	0	0	0	0	0	0	0.000144728	0	0	0	0	0	0	0	0	0	0	0	0	0	0	0	0	0	0	0	0	0	0	0	0	1.61245e-05	3.22489e-05	0
Coprococcus	0	0	0	0	0	0	0	0	0	0	0	0	0	0	0	0	0.000285171	0	0	0	0	0	0	0	0	0	0	0	0	0	0	0	0	0	0	0	0	0.000330415	0	0	1.53896e-05	1.42586e-05	1.73903e-05
Nesterenkonia	0	0	0.000482548	0	0	0	0	0	0	0	0.000124541	0	0	0	0	0	0	0	0	0	0	0	0	0	0	0	0	0	0	0	0	0	0	0	0	0	0	0	0	0	1.51772e-05	3.03544e-05	0
Peptostreptococcaceae_[XI][G-3]	0	0	0	0	0	0	0	0	0	0	0	0	0	0	0	0	0	0.000585892	0	0	0	0	0	0	0	0	0	0	0	0	0	0	0	0	0	0	0	0	0	0	1.46473e-05	2.92946e-05	0
Achromobacter	0	0	0	0	0	0	0	0	0.000462963	0	0	0	0	5.92e-05	0	0	0	5.86e-05	0	0	0	0	0	0	0	0	0	0	0	0	0	0	0	0	0	0	0	0	0	0	1.45191e-05	2.90381e-05	0
Firmicutes_[G]	0	0	0	0	0	0	0	0	0	0	0	0	0	0	0	0	0	0	0.000170648	0	0	0	0	0	0	0.000140667	0	0	0	0	0	0	0	0	0	0	0	0	0.000224845	0	1.3404e-05	8.5324e-06	1.92375e-05
Bacillus	0	0	0	0	0	0	0	8.22e-05	0	0	0	0	0	0	0	0	9.51e-05	0	0	0	0	0	0	0	0	0	0	0	0	0	0.00016621	0	0	0	0	0	0	8.26e-05	0	0.000105899	1.33002e-05	8.865e-06	1.86689e-05
Janibacter	0.000107521	0	8.04e-05	0	0	0.000322754	0	0	0	0	0	0	0	0	0	0	0	0	0	0	0	0	0	0	0	0	0	0	0	0	0	0	0	0	0	0	0	0	0	0	1.27669e-05	2.55338e-05	0
Arcanobacterium	0	0	0	0	0	0	0	0	0	0	0.000435893	7.25e-05	0	0	0	0	0	0	0	0	0	0	0	0	0	0	0	0	0	0	0	0	0	0	0	0	0	0	0	0	1.27098e-05	2.54196e-05	0
Dermabacter	0	0	0	0	0	0	0	0	0	0	0	0	0	0	0	0	0	0	0	0	0	0	0	0	0	0	0	0	0	0	0	0.000502765	0	0	0	0	0	0	0	0	1.25691e-05	0	2.64613e-05
Leptothrix	0	0	0	0	0	0	0	0	0	0	0	0	0	0	0	0	0	0	0	0	0	0	0	0	0	0	0	0	0	0	0	0.000502765	0	0	0	0	0	0	0	0	1.25691e-05	0	2.64613e-05
Desulfotomaculum	0	0	0	0	0	0	0	0	0	0	0	0	0	0	0	0	0	0	0	0	0	0	0	0	0	0.000492334	0	0	0	0	0	0	0	0	0	0	0	0	0	0	1.23083e-05	0	2.59123e-05
Gardnerella	0	0	0	0	0	0	0	0	0	0	0	0	0	0	0	0	0	5.86e-05	0	0	0	0	0	0	0	0	0	0	0	0	0	0	0	0	0	0	0	0.000413018	0	0	1.17905e-05	2.93e-06	2.17378e-05
Pseudoramibacter	0	0	0	0	0	0	0	0	0	0	0	0	0	0	0	0	0	0.000468713	0	0	0	0	0	0	0	0	0	0	0	0	0	0	0	0	0	0	0	0	0	0	1.17178e-05	2.34356e-05	0
multigenus	0	0	0	0	0	0	0	0	0	0	0	0	0	0	0	0	0	0.000468713	0	0	0	0	0	0	0	0	0	0	0	0	0	0	0	0	0	0	0	0	0	0	1.17178e-05	2.34356e-05	0
Butyrivibrio	0	0	0	0	8.54e-05	0	0	0	0	0	0	7.25e-05	0	0	5.42e-05	0	0	0.000234357	0	0	0	0	0	0	0	0	0	0	0	0	0	0	0	0	0	0	0	0	0	0	1.11614e-05	2.23229e-05	0
Allobaculum	0	0	0	0	0	0	0	0	0	0	0	0	0	0	0	0	0	0	0	0	0	0	0	0	0	0	0	0	0.000206932	0	0	0	0.000102717	0	0	0.000124984	0	0	0	0	1.08658e-05	0	2.28754e-05
Slackia	0	0	0	0	0	0	0	0	6.61e-05	0	0	7.25e-05	0	0	0	0	0	5.86e-05	0	0	0	0	0	0	0	0	0	0	0	0	0	0.000167588	0	0	6.57e-05	0	0	0	0	0	1.07622e-05	9.86e-06	1.22783e-05
Brevibacterium	0	0	0	0	0	0	0	0	0	0	0	0	0.000108826	0	0.00010836	0	0	0	0	0	0	0	0	0	0	0	0	0	0	0	0	0	0	0	0.000131449	0	7.43e-05	0	0	0	1.05734e-05	1.08593e-05	1.08289e-05
Lacnoclostridium	0	0	0	0	0	0	0	0	0	0	0	0	0	0	0	0	0	0	0	0	0	0	0	0	0	0.000422	0	0	0	0	0	0	0	0	0	0	0	0	0	0	1.055e-05	0	2.22105e-05
Bacteroidaceae_[G-1]	0	0	0	0	0	0	0	0	0.000132275	0	0	0	0	0	0	0	0	0.000117178	0	0	0	0	0	0	0	0	0	0	0	0	0	0	0	0	6.57e-05	0	0	8.26e-05	0	0	9.94382e-06	1.24726e-05	7.80526e-06
Rheinheimera	0	0	0	0	0	0	0.000395218	0	0	0	0	0	0	0	0	0	0	0	0	0	0	0	0	0	0	0	0	0	0	0	0	0	0	0	0	0	0	0	0	0	9.88045e-06	1.97609e-05	0
Geodermatophilus	0	0	8.04e-05	0	0	0	0	0	0	0	0	0	0	0	0	0	0	0.000117178	0	0	0	0	0	0	0	0	0	0	0	0	0	0.000167588	0	0	0	0	0	0	0	0	9.12915e-06	9.8789e-06	8.82042e-06
Gordonia	0	0	0	0	0	0	0	0	0	0	0	0	0	0	0	0	0	0	0	0	0	0	0	0	0	0	0	0	0	0	0	0.000335177	0	0	0	0	0	0	0	0	8.37942e-06	0	1.76409e-05
Bergeyella	0	0	0	0	0	0	0	0	0	0	0	0	0	0	0	0	0	0	0	0	0	0	0	0	0	0	0	0	0	0	0	0.000335177	0	0	0	0	0	0	0	0	8.37942e-06	0	1.76409e-05
Capnocytophaga	0	0	0	0	0	0	0	0	0	0	0	0	0	0	0	0	0	0	0	0	0	0	0	0	0	0	0	0	0	0	0.000332419	0	0	0	0	0	0	0	0	0	8.31047e-06	0	1.74957e-05
Helicobacter	0	0	0	0	0	0	0	0	0	0	0	0	0	0	0	0	0	0	0	0	0	0	0	0	0	0	0	0	0	0	0	0	0	0	0.000328623	0	0	0	0	0	8.21557e-06	0	1.72959e-05
Novosphingobium	0.000322563	0	0	0	0	0	0	0	0	0	0	0	0	0	0	0	0	0	0	0	0	0	0	0	0	0	0	0	0	0	0	0	0	0	0	0	0	0	0	0	8.06407e-06	1.61281e-05	0
Cetobacterium	0	0	0	0	0	0	0	0	0	0	0	0	0	0	0	0	0	0	0	0	0	0	0	0	0	0	0	0	0	0	0	0	0	0	0	0	0	0	0	0.000317696	7.9424e-06	0	1.67208e-05
Dysgonomonas	0	0	0	0	0	0	0	0	0.000132275	0	0	0	0	0	0	0	0	0	0	0	0	0	0	0	0	0	0	0	0	0	0.00016621	0	0	0	0	0	0	0	0	0	7.46213e-06	6.61375e-06	8.74789e-06
Chryseoglobus	0	0.000284172	0	0	0	0	0	0	0	0	0	0	0	0	0	0	0	0	0	0	0	0	0	0	0	0	0	0	0	0	0	0	0	0	0	0	0	0	0	0	7.1043e-06	1.42086e-05	0
Renibacterium	0	0	0	0	0	0	0	0	0	0	0	0	0	0	0	0	0	0	0	0	0	0	0.000128353	0.000147747	0	0	0	0	0	0	0	0	0	0	0	0	0	0	0	0	6.9025e-06	0	1.45316e-05
Bacteroidetes_[G-6]	0	3.55e-05	0	0	0	0	0	0	0	0	0	0	0	0	0	0	0	0.000234357	0	0	0	0	0	0	0	0	0	0	0	0	0	0	0	0	0	0	0	0	0	0	6.74643e-06	1.34929e-05	0
Aquabacterium	0	0	0	0	0	0	0	0	0	0	0	0	0	0	0	0	0	0	0	0	0	0	0	0	0	0	0	0.000243092	0	0	0	0	0	0	0	0	0	0	0	0	6.0773e-06	0	1.27943e-05
Syntrophomonas	0	0	0	0	0	0	0	0	0	0	0	0	0	0	0	0	0	0	0	0	0	0	0	0	0	0	0	0	0	0	0	0	0	0	0	0	0	0	0.000224845	0	5.62112e-06	0	1.18339e-05
Arthrobacter	0	0	0	0	0	0.000215169	0	0	0	0	0	0	0	0	0	0	0	0	0	0	0	0	0	0	0	0	0	0	0	0	0	0	0	0	0	0	0	0	0	0	5.37923e-06	1.07585e-05	0
Coriobacterium	0	0	0	0	0	0	0	0	0	0	0	0	0	0	0	0	0	0	0	0	0	0	0	0	0	0	0	0	0	0	0	0	0	0	0	0	0	0	0	0.000211797	5.29492e-06	0	1.11472e-05
Desulfovibrio	0	0	0	0	0	0	0	0	0.000198413	0	0	0	0	0	0	0	0	0	0	0	0	0	0	0	0	0	0	0	0	0	0	0	0	0	0	0	0	0	0	0	4.96033e-06	9.92065e-06	0
Actinobaculum	0	0	0	0	0	0	0	0	0	0	0	0	0	0	0	0	0	0	0	0	0	0	0	0	0	0	0	0	0	0	0	8.38e-05	0	0	0	0	0	0	0.000112423	0	4.90558e-06	0	1.03275e-05
Peptoniphilaceae_[G-1]	0	0	0	0	0	0	0	0	0	0	0.000186811	0	0	0	0	0	0	0	0	0	0	0	0	0	0	0	0	0	0	0	0	0	0	0	0	0	0	0	0	0	4.67027e-06	9.34055e-06	0
Cryptobacterium	0	0	0	0	0	0.000107585	0	0	0	0	0	0	0	0	0	0	0	0	0	0	0	0	0	0	0	0	0	0	0	0	0	0	0	7.43e-05	0	0	0	0	0	0	4.54713e-06	5.37925e-06	3.91053e-06
Eggerthella	0	0	0	0	0	0	0	0	0	0	0	0	0	0	0	0	0	0.000175768	0	0	0	0	0	0	0	0	0	0	0	0	0	0	0	0	0	0	0	0	0	0	4.3942e-06	8.7884e-06	0
Sneathia	0	0	0	0	0	0	0	0	0	0	0	0	0	0	0	0	0	0.000175768	0	0	0	0	0	0	0	0	0	0	0	0	0	0	0	0	0	0	0	0	0	0	4.3942e-06	8.7884e-06	0
Cellulosilyticum	0	0	0	0	0.000170867	0	0	0	0	0	0	0	0	0	0	0	0	0	0	0	0	0	0	0	0	0	0	0	0	0	0	0	0	0	0	0	0	0	0	0	4.27168e-06	8.54335e-06	0
Butyrivibrio	0	0	0	0	0.000170867	0	0	0	0	0	0	0	0	0	0	0	0	0	0	0	0	0	0	0	0	0	0	0	0	0	0	0	0	0	0	0	0	0	0	0	4.27168e-06	8.54335e-06	0
Acetivibrio	0	0	0	0	0.000170867	0	0	0	0	0	0	0	0	0	0	0	0	0	0	0	0	0	0	0	0	0	0	0	0	0	0	0	0	0	0	0	0	0	0	0	4.27168e-06	8.54335e-06	0
Herbaspirillum	0	0	0	0	0.000170867	0	0	0	0	0	0	0	0	0	0	0	0	0	0	0	0	0	0	0	0	0	0	0	0	0	0	0	0	0	0	0	0	0	0	0	4.27168e-06	8.54335e-06	0
Microbacterium	0	0	0	0	0	0	0	0	0	0	0	0	0	0	0	0	0	0	0	0	0	0	0	0	0	0	6.43e-05	0	0	0	0	0	0	0	0	0	0	0	0	0.000105899	4.25497e-06	0	8.95784e-06
Castellaniella	0	0	0	0	0	0	0	0	0	0	0	0	0	0	0	0	0	0	0	0	0	0	0	0	0	0	0	0	0	0	0	0.000167588	0	0	0	0	0	0	0	0	4.1897e-06	0	8.82042e-06
Zymobacter	0	0	0	0	0	0	0	0	0	0	0	0	0	0	0	0	0	0	0	0	0	0	0	0	0	0	0	0	0	0	0	0.000167588	0	0	0	0	0	0	0	0	4.1897e-06	0	8.82042e-06
Cryobacterium	0	0	0	0	0	0	0	0	0	0	0	0	0	0	0	0	0	0	0	0	0	0	0	0	0	0	0	0	0	0	0.00016621	0	0	0	0	0	0	0	0	0	4.15525e-06	0	8.74789e-06
Peptoclostridium	0	0	0	0	0	0	0	0	0	0	0	0	0	0	0	0	0	0	0	0	0	0	0	0	0	0	0	0	0	0	0.00016621	0	0	0	0	0	0	0	0	0	4.15525e-06	0	8.74789e-06
Aliicoccus	0	0	0	0	0	0	0	0	0	0	0	0	0	0	0	0	0	0	0	0	0	0	0	0	0	0	0	0	0	0	0	0	0	0	0	0	0	0.000165207	0	0	4.13017e-06	0	8.69511e-06
Ruminoclostridium	0	0	0	0	0	0	0	0	0	0	0	0	0	0	0	0	0	0	0	0	0	0	0	0	0	0	0	0	0	0	0	0	0	0	0	0	0	0.000165207	0	0	4.13017e-06	0	8.69511e-06
Aquincola	0.000161282	0	0	0	0	0	0	0	0	0	0	0	0	0	0	0	0	0	0	0	0	0	0	0	0	0	0	0	0	0	0	0	0	0	0	0	0	0	0	0	4.03205e-06	8.0641e-06	0
Brachybacterium	0	3.55e-05	0	0	0	0	0	0	0	0	0	0	0	0	0	0	0	0.000117178	0	0	0	0	0	0	0	0	0	0	0	0	0	0	0	0	0	0	0	0	0	0	3.81695e-06	7.6339e-06	0
Knoellia	0	0	0	0	0	0	0	0	0	0	0	0	0	0	0	0	0	0	0	0	0	0	0	0	0	0	0	0	0	0	0	0	0	0	0	0	0.000148544	0	0	0	3.7136e-06	0	7.81811e-06
Exiguobacterium	0	3.55e-05	0	0	0	0	0	0	0	0	0	0	0	0	0	0	0	0	0	0	0	0	0	0	0	0	0	0	0	0	0	0	0	0	0	0	0	0	0.000112423	0	3.69808e-06	1.775e-06	5.917e-06
Bosea	0	0	0	0.000142929	0	0	0	0	0	0	0	0	0	0	0	0	0	0	0	0	0	0	0	0	0	0	0	0	0	0	0	0	0	0	0	0	0	0	0	0	3.57322e-06	7.14645e-06	0
Methyloversatilis	0	0	0	0.000142929	0	0	0	0	0	0	0	0	0	0	0	0	0	0	0	0	0	0	0	0	0	0	0	0	0	0	0	0	0	0	0	0	0	0	0	0	3.57322e-06	7.14645e-06	0
Peptoclostridium	0	0	0	0	8.54e-05	0	0	0	0	0	0	0	0	0	0	0	0	0	5.69e-05	0	0	0	0	0	0	0	0	0	0	0	0	0	0	0	0	0	0	0	0	0	3.5575e-06	7.115e-06	0
Selenomonas	0	0.000142086	0	0	0	0	0	0	0	0	0	0	0	0	0	0	0	0	0	0	0	0	0	0	0	0	0	0	0	0	0	0	0	0	0	0	0	0	0	0	3.55215e-06	7.1043e-06	0
Glutamicibacter	0	0	0	0	0	0	0	0	0	0	0	0	0	0	0	0	0	0	0	0	0	0	0	0	0	0.000140667	0	0	0	0	0	0	0	0	0	0	0	0	0	0	3.51668e-06	0	7.40353e-06
Bacteroides	0	0	0	0	0	0	0	0	0	0	0	0	0	0	0	0	0	0	0	0	0	0	0	0	0	0.000140667	0	0	0	0	0	0	0	0	0	0	0	0	0	0	3.51668e-06	0	7.40353e-06
Psychrobacter	0	7.1e-05	0	0	0	0	0	0	0	0	0	0	0	5.92e-05	0	0	0	0	0	0	0	0	0	0	0	0	0	0	0	0	0	0	0	0	0	0	0	0	0	0	3.255e-06	6.51e-06	0
Arsenicicoccus	0	0	0	0	0	0	0	0	0	0	0	0	0	0	0	0	0	0	0	0	0	0	0	0	0	0	0	0	0	0	0	0	0	0	0	0.000124984	0	0	0	0	3.1246e-06	0	6.57811e-06
Agrococcus	0	0	0	0	0	0	0	0	0	0	0.000124541	0	0	0	0	0	0	0	0	0	0	0	0	0	0	0	0	0	0	0	0	0	0	0	0	0	0	0	0	0	3.11353e-06	6.22705e-06	0
Enterobacter	0	0	0	0	0	0	0	0	0	0.000117247	0	0	0	0	0	0	0	0	0	0	0	0	0	0	0	0	0	0	0	0	0	0	0	0	0	0	0	0	0	0	2.93117e-06	5.86235e-06	0
Caldilinea	0	0	0	0	0	0	0	0	0	0	0	0	0	0	0	0	0	0.000117178	0	0	0	0	0	0	0	0	0	0	0	0	0	0	0	0	0	0	0	0	0	0	2.92945e-06	5.8589e-06	0
Pseudoxanthomonas	0	0	0	0	0	0	0	0	0	0	0	0	0	0	0	0	0	0.000117178	0	0	0	0	0	0	0	0	0	0	0	0	0	0	0	0	0	0	0	0	0	0	2.92945e-06	5.8589e-06	0
Ruminococcaceae_[G-3]	0	0	0	0	0	0	0	0	0	0	0	0	0.000108826	0	0	0	0	0	0	0	0	0	0	0	0	0	0	0	0	0	0	0	0	0	0	0	0	0	0	0	2.72065e-06	5.4413e-06	0
Chryseobacterium	0	0	0	0	0	0	0	0	0	0	0	0	0	0	0.00010836	0	0	0	0	0	0	0	0	0	0	0	0	0	0	0	0	0	0	0	0	0	0	0	0	0	2.709e-06	5.418e-06	0
Paenibacillus	0.000107521	0	0	0	0	0	0	0	0	0	0	0	0	0	0	0	0	0	0	0	0	0	0	0	0	0	0	0	0	0	0	0	0	0	0	0	0	0	0	0	2.68802e-06	5.37605e-06	0
Propionigenium	0	0.000106564	0	0	0	0	0	0	0	0	0	0	0	0	0	0	0	0	0	0	0	0	0	0	0	0	0	0	0	0	0	0	0	0	0	0	0	0	0	0	2.6641e-06	5.3282e-06	0
Variovorax	0	0	0	0	0	0	0	0	0	0	0	0	0	0	0	0	0	0	0	0	0	0	0	0	0	0	0	0	0	0	0	0	0.000102717	0	0	0	0	0	0	0	2.56793e-06	0	5.40616e-06
Parageobacillus	0	0	0	0	0	0	9.88e-05	0	0	0	0	0	0	0	0	0	0	0	0	0	0	0	0	0	0	0	0	0	0	0	0	0	0	0	0	0	0	0	0	0	2.47e-06	4.94e-06	0
Porphyromonas	0	0	0	0	0	0	0	0	0	0	0	0	0	0	0	0	0	0	0	0	0	0	0	0	9.51e-05	0	0	0	0	0	0	0	0	0	0	0	0	0	0	0	2.3775e-06	0	5.00526e-06
Anaeroglobus	0	0	0	0	0	0	0	0	0	0	0	0	0	0	0	0	9.51e-05	0	0	0	0	0	0	0	0	0	0	0	0	0	0	0	0	0	0	0	0	0	0	0	2.3775e-06	4.755e-06	0
Rosenbergiella	0	0	0	0	0	0	0	0	0	0	0	0	0	0	0	0	9.51e-05	0	0	0	0	0	0	0	0	0	0	0	0	0	0	0	0	0	0	0	0	0	0	0	2.3775e-06	4.755e-06	0
Mitsuokella	0	0	0	0	0	0	0	0	0	0	0	0	0	0	0	0	0	0	0	0	0	0	0	0	0	0	0	0	0	0	0	0	0	0	0	0	0	8.26e-05	0	0	2.065e-06	0	4.34737e-06
Blastococcus	0	0	0	0	0	0	0	0	0	0	0	0	0	0	0	0	0	0	0	0	0	0	0	0	0	0	0	8.1e-05	0	0	0	0	0	0	0	0	0	0	0	0	2.025e-06	0	4.26316e-06
Hydrogenophaga	0	0	0	0	0	0	0	0	0	0	0	0	0	0	0	0	0	0	0	0	0	0	0	0	0	0	0	8.1e-05	0	0	0	0	0	0	0	0	0	0	0	0	2.025e-06	0	4.26316e-06
Eubacterium_[XI][G]	0	0	8.04e-05	0	0	0	0	0	0	0	0	0	0	0	0	0	0	0	0	0	0	0	0	0	0	0	0	0	0	0	0	0	0	0	0	0	0	0	0	0	2.01e-06	4.02e-06	0
Desulfomicrobium	0	0	8.04e-05	0	0	0	0	0	0	0	0	0	0	0	0	0	0	0	0	0	0	0	0	0	0	0	0	0	0	0	0	0	0	0	0	0	0	0	0	0	2.01e-06	4.02e-06	0
Oxalobacteraceae_[G]	0	0	0	0	0	0	0	0	0	0	0	0	0	0	0	0	0	0	0	0	0	0	0	0	0	0	0	0	0	0	0	0	0	0	0	0	7.43e-05	0	0	0	1.8575e-06	0	3.91053e-06
Anaerococcus	0	0	0	0	0	0	0	0	0	0	0	7.25e-05	0	0	0	0	0	0	0	0	0	0	0	0	0	0	0	0	0	0	0	0	0	0	0	0	0	0	0	0	1.8125e-06	3.625e-06	0
Tissierella	0	0	0	0	0	0	0	0	6.61e-05	0	0	0	0	0	0	0	0	0	0	0	0	0	0	0	0	0	0	0	0	0	0	0	0	0	0	0	0	0	0	0	1.6525e-06	3.305e-06	0
Peptostreptococcaceae_[XI][G-8]	0	0	0	0	0	0	0	0	0	0	0	0	0	0	0	0	0	0	0	0	0	0	0	0	0	0	0	0	0	0	0	0	0	0	6.57e-05	0	0	0	0	0	1.6425e-06	0	3.45789e-06
TM7_[G]	0	0	0	0	0	0	0	0	0	0	6.23e-05	0	0	0	0	0	0	0	0	0	0	0	0	0	0	0	0	0	0	0	0	0	0	0	0	0	0	0	0	0	1.5575e-06	3.115e-06	0
Mobiluncus	0	0	0	0	0	0	0	0	0	0	0	0	0	5.92e-05	0	0	0	0	0	0	0	0	0	0	0	0	0	0	0	0	0	0	0	0	0	0	0	0	0	0	1.48e-06	2.96e-06	0
Dialister	0	0	0	0	0	0	0	0	0	0	0	0	0	5.92e-05	0	0	0	0	0	0	0	0	0	0	0	0	0	0	0	0	0	0	0	0	0	0	0	0	0	0	1.48e-06	2.96e-06	0
Peptoniphilus	0	0	0	0	0	0	0	0	0	0	0	0	0	5.92e-05	0	0	0	0	0	0	0	0	0	0	0	0	0	0	0	0	0	0	0	0	0	0	0	0	0	0	1.48e-06	2.96e-06	0
Pseudonocardia	0	0	0	0	0	0	0	0	0	0	0	0	0	0	0	0	0	5.86e-05	0	0	0	0	0	0	0	0	0	0	0	0	0	0	0	0	0	0	0	0	0	0	1.465e-06	2.93e-06	0
Comamonadaceae_[G]	0	0	0	0	0	0	0	0	0	0	0	0	5.44e-05	0	0	0	0	0	0	0	0	0	0	0	0	0	0	0	0	0	0	0	0	0	0	0	0	0	0	0	1.36e-06	2.72e-06	0
Parascardovia	0	0	0	0	0	0	0	0	0	0	0	0	0	0	0	0	0	0	0	0	0	0	0	4.92e-05	0	0	0	0	0	0	0	0	0	0	0	0	0	0	0	0	1.23e-06	0	2.58947e-06

## Sheet: Frequencies
Detection frequencies of genera
Status	Cancer	Cancer	Cancer	Cancer	Cancer	Cancer	Cancer	Cancer	Cancer	Cancer	Cancer	Cancer	Cancer	Cancer	Cancer	Cancer	Cancer	Cancer	Cancer	Cancer	Control	Control	Control	Control	Control	Control	Control	Control	Control	Control	Control	Control	Control	Control	Control	Control	Control	Control	Control	Control	Over all	OSCC	Control
ID	C1	C2	C3	C4	C5	C6	C7	C8	C9	C10	C11	C12	C13	C14	C15	C16	C17	C18	C19	C20	N1	N2	N3	N4	N5	N6	N7	N8	N9	N10	N11	N12	N13	N14	N15	N16	N17	N18	N19	N20
Streptococcus	1	1	1	1	1	1	1	1	1	1	1	1	1	1	1	1	1	1	1	1	1	1	1	1	1	1	1	1	1	1	1	1	1	1	1	1	1	1	1	1	1	1	1
Fusobacterium	1	1	1	1	1	1	1	1	1	1	1	1	1	1	1	1	1	1	1	1	1	1	1	1	1	1	1	1	1	1	1	1	1	1	1	1	1	1	1	1	1	1	1
Leptotrichia	1	1	1	1	1	1	1	1	1	1	1	1	1	1	1	1	1	1	1	1	1	1	1	1	1	1	1	1	1	1	1	1	1	1	1	1	1	1	1	1	1	1	1
Prevotella	1	1	1	1	1	1	1	1	1	1	1	1	1	1	1	0	1	1	1	1	1	1	1	1	1	1	1	1	1	1	1	1	1	1	1	1	1	1	1	1	0.975	0.95	1
Capnocytophaga	1	1	1	1	1	1	1	1	1	0	1	1	1	1	1	1	1	1	1	1	1	1	1	1	1	1	1	1	1	1	1	1	1	1	1	1	1	1	1	1	0.975	0.95	1
Gemella	1	1	1	1	1	1	1	1	1	0	1	1	1	1	1	1	1	1	1	1	1	1	1	1	1	1	1	1	1	1	1	1	1	1	1	1	1	1	1	1	0.975	0.95	1
Granulicatella	1	1	1	1	1	1	1	1	1	1	1	1	1	0	1	1	1	1	1	1	1	1	1	1	1	1	1	1	1	1	1	1	1	1	1	1	1	1	1	1	0.975	0.95	1
Veillonella	1	1	1	1	1	1	1	1	1	1	1	1	1	1	1	0	1	1	1	1	1	1	1	1	1	1	1	1	1	1	1	1	1	1	1	1	1	1	1	1	0.975	0.95	1
Neisseria	1	1	1	1	1	1	1	1	1	0	1	1	1	1	1	1	1	1	1	1	1	1	1	1	1	1	1	1	1	1	1	1	1	1	1	1	1	1	1	1	0.975	0.95	1
Haemophilus	1	1	1	1	1	1	1	1	1	0	1	1	1	1	1	1	1	1	1	1	1	1	1	1	1	1	1	1	1	1	1	1	1	1	1	1	1	1	1	1	0.975	0.95	1
Porphyromonas	1	1	1	1	1	1	1	1	1	0	1	1	1	1	1	1	1	1	1	1	1	1	1	0	1	1	1	1	1	1	1	1	1	1	1	1	1	1	1	1	0.95	0.95	0.95
Campylobacter	1	1	1	1	1	1	1	1	1	0	1	1	1	1	1	1	1	1	1	1	1	0	1	1	1	1	1	1	1	1	1	1	1	1	1	1	1	1	1	1	0.95	0.95	0.95
Actinomyces	1	1	1	1	0	1	1	1	1	0	1	1	1	0	1	0	1	1	1	1	1	1	1	1	1	1	1	1	1	1	1	1	1	1	1	1	1	1	1	1	0.9	0.8	1
Rothia	1	1	1	1	1	1	1	0	1	0	1	1	1	0	1	1	1	0	1	1	1	1	1	1	1	1	1	1	1	1	1	1	1	1	1	1	1	1	1	1	0.9	0.8	1
Alloprevotella	1	1	1	1	1	1	1	1	1	1	1	1	1	1	1	0	0	1	1	1	1	1	1	0	1	1	0	1	1	1	1	1	1	1	1	1	1	1	1	1	0.9	0.9	0.9
Aggregatibacter	1	1	1	1	1	1	1	1	1	0	1	1	1	1	1	1	1	0	1	0	1	1	0	0	1	1	1	1	1	1	1	0	1	1	1	1	0	1	1	1	0.825	0.85	0.8
Propionibacterium	1	1	1	1	1	1	1	1	1	0	1	1	1	1	1	0	1	1	1	1	1	1	0	0	1	1	0	1	1	1	1	1	1	0	1	0	1	1	1	0	0.8	0.9	0.7
Bergeyella	0	1	1	1	0	0	1	1	1	0	1	1	1	1	1	0	0	1	1	1	1	1	1	0	1	1	1	1	1	1	1	1	1	1	1	1	1	1	1	0	0.8	0.7	0.9
Lachnoanaerobaculum	1	1	1	1	1	0	1	1	1	0	1	1	0	0	1	0	1	1	1	1	0	0	1	1	1	1	1	0	1	1	1	1	1	1	1	1	1	1	1	1	0.8	0.75	0.85
Atopobium	1	1	1	1	1	0	1	1	1	1	1	1	1	0	1	0	1	1	1	0	1	1	1	1	0	0	1	1	1	1	0	0	1	1	1	1	0	1	0	1	0.75	0.8	0.7
Parvimonas	1	1	1	1	1	1	1	1	1	0	1	1	1	1	1	0	1	1	1	0	0	0	1	0	1	0	1	1	0	0	0	1	1	1	1	1	1	0	1	1	0.725	0.85	0.6
Oribacterium	0	1	1	1	1	0	1	0	1	0	1	1	0	0	0	0	1	1	1	1	0	1	1	1	1	0	1	0	1	1	1	1	0	1	1	1	1	1	1	1	0.7	0.6	0.8
TM7_[G-1]	1	0	1	0	0	0	1	1	1	0	1	1	0	0	1	0	0	1	1	0	1	1	1	0	1	1	0	1	1	1	1	1	1	1	1	1	1	1	1	1	0.7	0.5	0.9
Solobacterium	1	1	1	0	0	0	1	1	1	0	1	1	1	1	1	1	0	1	1	0	0	0	0	0	1	0	1	1	1	1	1	1	0	1	0	1	1	1	1	1	0.675	0.7	0.65
Tannerella	1	1	0	1	0	0	1	1	1	0	1	1	1	0	1	1	0	1	1	0	0	1	1	0	1	1	0	0	0	1	0	1	1	1	1	1	1	1	1	0	0.65	0.65	0.65
Catonella	1	1	1	0	1	1	1	0	1	0	1	1	1	0	1	0	0	1	1	1	0	1	1	0	0	1	0	0	1	1	0	0	1	1	1	1	1	1	1	0	0.65	0.7	0.6
Kingella	1	0	1	1	1	0	1	1	1	0	1	1	0	1	1	1	1	0	1	0	1	0	0	0	1	1	0	1	1	1	1	0	1	1	0	1	0	1	1	0	0.65	0.7	0.6
Pseudomonas	1	1	1	1	1	1	1	0	1	1	1	1	1	1	1	1	1	1	1	1	1	0	0	0	0	0	0	1	0	0	1	1	0	0	1	0	1	0	1	0	0.65	0.95	0.35
Treponema	1	1	1	0	1	0	1	0	1	0	1	1	1	1	1	0	1	1	1	1	0	0	0	0	1	1	0	1	0	0	1	0	1	1	1	0	1	1	1	1	0.65	0.75	0.55
Mogibacterium	0	1	1	0	1	0	1	1	1	1	1	1	1	0	1	0	1	1	1	0	1	0	0	0	1	0	1	1	1	1	0	0	0	1	1	0	0	1	1	1	0.625	0.7	0.55
Lautropia	1	0	0	0	0	1	0	1	1	0	0	1	1	0	1	0	0	0	1	0	1	1	0	0	1	1	1	1	1	1	1	1	1	1	1	1	0	1	1	1	0.625	0.4	0.85
Peptostreptococcus	1	1	0	1	1	1	1	1	1	1	1	1	1	1	1	0	1	1	1	0	0	0	0	0	1	0	0	1	0	0	0	0	1	1	1	1	0	0	1	0	0.6	0.85	0.35
Eikenella	1	0	1	1	1	1	1	1	1	0	0	1	1	1	1	0	1	0	1	0	0	1	1	0	1	1	0	0	0	1	0	0	1	0	1	1	0	1	1	0	0.6	0.7	0.5
Stomatobaculum	0	0	1	1	0	0	0	1	1	0	0	1	0	0	0	0	0	1	1	1	0	0	1	1	0	1	1	1	1	1	1	1	0	1	0	1	1	1	1	1	0.575	0.4	0.75
Selenomonas	1	1	1	1	1	0	1	1	1	0	1	1	1	0	1	0	1	1	1	1	0	0	0	0	0	1	0	1	0	0	0	0	1	0	1	0	0	1	1	1	0.575	0.8	0.35
SR1_[G-1]	1	1	1	0	1	0	1	0	1	0	1	1	0	0	1	0	0	0	0	0	1	0	1	0	1	1	0	1	1	1	1	0	1	0	1	1	1	1	1	0	0.575	0.45	0.7
Corynebacterium	1	0	1	0	0	0	1	1	1	0	1	1	1	0	1	0	0	0	0	0	0	1	0	0	1	1	0	1	0	1	0	1	1	0	1	0	1	1	1	0	0.5	0.45	0.55
TM7_[G-6]	1	0	1	0	1	0	0	1	1	0	0	1	1	0	0	0	1	0	1	0	1	1	0	0	1	0	0	1	1	1	0	0	0	0	0	1	1	1	1	1	0.5	0.45	0.55
Abiotrophia	1	0	0	1	0	1	0	1	0	0	0	1	1	1	0	0	0	1	1	0	1	1	1	0	1	1	0	1	0	1	0	0	1	0	0	1	0	0	1	0	0.475	0.45	0.5
Corynebacterium	0	1	0	1	1	0	0	1	1	0	0	1	1	1	1	0	0	0	0	0	0	1	0	0	0	1	0	0	1	1	0	1	1	0	0	0	1	1	1	0	0.45	0.45	0.45
Ruminococcaceae_[G-2]	0	0	0	1	0	0	1	0	1	0	1	1	0	0	0	0	0	1	0	0	0	0	1	0	0	1	1	0	1	0	1	0	1	1	1	1	1	0	0	1	0.425	0.3	0.55
Lachnospiraceae_[G-3]	1	1	0	0	0	0	1	0	1	0	1	1	0	0	1	0	0	1	0	0	0	0	1	0	1	1	0	0	0	0	0	1	1	0	0	1	1	0	1	0	0.4	0.4	0.4
Lachnospiraceae_[G]	1	0	1	0	1	0	1	0	1	0	1	0	0	0	0	0	1	1	0	0	1	0	0	0	1	1	0	1	0	0	0	1	0	0	1	0	0	1	1	0	0.4	0.4	0.4
Mycoplasma	0	1	1	1	1	1	0	0	1	1	0	0	0	1	0	0	1	1	1	0	0	0	0	0	0	0	1	0	0	0	0	1	0	1	1	0	0	1	0	0	0.4	0.55	0.25
Moraxella	1	0	0	1	0	0	0	0	1	0	1	1	0	0	1	0	0	1	0	0	0	0	0	0	1	0	0	1	0	1	1	1	1	0	0	1	1	0	1	0	0.4	0.35	0.45
Staphylococcus	1	0	1	1	0	1	1	0	0	0	0	1	0	1	0	1	1	1	0	0	0	1	0	0	0	1	0	0	0	0	0	1	0	0	0	0	1	0	1	0	0.375	0.5	0.25
Peptostreptococcaceae_[XI][G-1]	0	1	0	0	0	0	0	1	1	0	1	1	1	0	0	0	1	1	1	0	0	0	0	0	0	0	0	0	1	0	0	0	0	1	0	0	1	1	1	1	0.375	0.45	0.3
Peptostreptococcaceae_[XI][G-7]	1	0	0	0	1	1	1	0	1	0	1	1	1	0	1	0	0	1	0	1	0	0	0	0	0	1	0	0	0	0	0	0	0	0	1	0	1	0	1	0	0.375	0.55	0.2
Cardiobacterium	1	0	0	0	0	0	1	1	1	0	1	0	1	0	1	0	0	0	0	0	0	0	0	0	1	1	0	0	0	0	0	1	1	1	1	0	0	1	1	0	0.375	0.35	0.4
Acinetobacter	1	0	1	1	0	1	1	0	1	0	0	1	0	0	1	0	1	1	0	0	1	0	0	0	0	0	0	0	0	0	0	1	0	0	1	0	1	0	1	0	0.375	0.5	0.25
Filifactor	1	1	1	0	1	0	0	0	1	0	1	1	0	0	1	0	0	1	0	0	0	0	0	0	0	0	0	1	0	0	0	0	0	1	1	0	0	1	1	0	0.35	0.45	0.25
Fretibacterium	0	1	1	0	1	0	1	0	1	0	1	1	0	0	0	0	1	1	0	0	0	0	0	0	0	0	0	1	0	0	0	0	0	1	1	0	0	1	1	0	0.35	0.45	0.25
Bacteroidales_[G-2]	1	0	0	0	0	1	0	0	1	0	1	1	1	0	1	0	0	0	0	0	0	0	1	0	1	1	0	0	0	0	0	0	1	0	1	0	0	0	1	0	0.325	0.35	0.3
Lachnospiraceae_[G-2]	0	1	1	0	1	0	0	0	1	0	1	0	0	0	1	0	0	1	0	1	0	0	0	0	0	0	0	1	0	1	0	0	0	1	1	1	0	0	0	0	0.325	0.4	0.25
Lachnospiraceae_[G-8]	0	1	0	0	1	0	0	0	1	0	1	1	0	0	1	0	0	1	0	0	0	0	0	0	0	0	0	1	0	0	0	0	0	1	1	0	1	1	1	0	0.325	0.35	0.3
Megasphaera	0	0	1	1	0	0	1	0	1	0	0	1	0	0	0	0	1	1	1	0	0	0	0	0	0	0	1	0	0	0	0	0	0	1	1	0	0	1	0	1	0.325	0.4	0.25
Delftia	1	1	0	1	0	0	1	1	0	0	0	1	0	0	0	1	1	1	0	0	0	1	0	0	0	0	0	1	0	0	0	1	0	0	0	0	1	0	0	0	0.325	0.45	0.2
Kocuria	0	0	0	1	0	1	1	0	1	0	1	0	1	0	0	0	1	1	0	1	0	0	0	0	0	0	1	1	0	0	0	1	0	0	0	0	0	0	0	0	0.3	0.45	0.15
Microbacterium	0	1	0	0	0	0	0	1	0	0	0	0	0	0	0	0	0	0	0	1	0	0	0	0	0	0	1	0	1	0	1	0	0	1	0	1	0	1	1	1	0.275	0.15	0.4
Clostridiales_[F-1][G-1]	0	0	0	0	1	0	1	0	1	0	1	0	0	0	1	0	1	1	0	0	0	0	0	0	0	0	0	1	0	0	0	0	0	0	1	0	0	1	1	0	0.275	0.35	0.2
Dialister	1	1	0	0	1	0	0	1	1	0	0	0	0	0	1	0	1	1	1	0	0	0	0	0	0	0	0	0	0	0	0	0	0	1	1	0	0	0	0	0	0.275	0.45	0.1
Sphingomonas	0	1	0	1	0	0	0	1	1	0	0	0	0	1	0	1	0	1	0	0	0	0	0	0	0	1	1	1	0	0	0	1	0	0	0	0	0	0	0	0	0.275	0.35	0.2
Ottowia	1	0	0	0	0	0	0	1	1	0	0	0	1	0	1	0	0	0	0	0	0	0	0	0	1	1	0	1	0	0	1	0	0	0	0	0	0	0	1	1	0.275	0.25	0.3
TM7_[G-5]	0	0	1	0	0	0	0	0	0	0	1	0	0	0	0	0	0	0	0	0	0	0	0	1	0	0	1	0	0	0	0	0	1	1	1	1	0	1	1	1	0.275	0.1	0.45
Micrococcus	0	0	0	0	0	1	1	1	0	0	0	0	0	1	0	1	0	1	0	1	0	0	0	0	0	0	0	1	0	1	0	1	0	0	0	0	0	0	0	0	0.25	0.35	0.15
Bacteroidetes_[G-5]	0	0	0	0	1	0	0	0	0	0	1	1	0	0	1	0	1	1	0	0	0	0	0	0	0	0	0	0	0	0	0	0	1	0	1	0	0	1	1	0	0.25	0.3	0.2
Peptostreptococcaceae_[XI][G-4]	1	1	0	0	1	0	1	0	0	0	0	0	0	0	1	0	1	1	0	0	0	0	0	0	0	0	0	0	0	1	0	0	0	0	1	0	0	1	0	0	0.25	0.35	0.15
Fusobacteria_[G-1]	0	0	0	0	1	0	0	0	1	0	0	0	0	1	0	0	0	1	0	0	0	0	0	0	0	0	1	1	0	1	0	0	0	1	0	1	0	1	0	0	0.25	0.2	0.3
GN02_[G-2]	1	0	0	0	1	0	0	0	1	0	1	0	0	0	1	0	0	0	0	0	1	1	0	0	0	1	0	0	0	0	1	0	0	0	0	0	0	0	1	0	0.25	0.25	0.25
Stenotrophomonas	1	0	0	0	0	0	1	0	1	0	0	0	0	0	1	1	0	1	0	1	0	0	0	0	0	0	0	0	0	0	0	1	0	0	0	0	1	0	1	0	0.25	0.35	0.15
Johnsonella	0	0	0	0	0	0	0	0	1	0	0	0	0	0	1	0	0	1	0	0	0	0	0	0	0	0	0	1	0	0	0	0	1	0	1	1	0	1	1	0	0.225	0.15	0.3
Lachnospiraceae_[G-7]	0	1	1	0	1	0	0	0	1	0	1	1	0	0	0	0	0	1	1	0	0	0	0	0	0	0	0	0	0	0	0	0	0	0	1	0	0	0	0	0	0.225	0.4	0.05
Peptostreptococcaceae_[XI][G-2]	1	1	0	0	1	1	0	0	0	0	1	0	0	0	1	0	0	1	1	0	0	0	0	0	0	0	0	0	0	0	0	0	0	0	1	0	0	0	0	0	0.225	0.4	0.05
Peptostreptococcaceae_[XI][G-9]	1	0	0	0	1	1	0	0	0	0	1	1	0	0	0	0	0	0	0	0	0	0	0	0	0	0	1	1	0	0	0	0	0	1	1	0	0	0	0	0	0.225	0.25	0.2
Alloscardovia	1	0	0	1	0	1	1	0	0	0	0	1	0	0	0	0	0	1	1	0	0	0	0	0	0	0	1	0	0	0	0	0	0	0	0	0	0	0	0	0	0.2	0.35	0.05
Bifidobacterium	0	0	0	0	0	0	0	0	0	0	0	0	1	0	0	0	1	1	0	1	0	0	0	0	0	0	1	1	0	0	0	1	0	0	1	0	0	0	0	0	0.2	0.2	0.2
Scardovia	0	0	0	0	1	0	1	1	0	0	0	1	0	0	0	0	0	0	1	0	0	0	0	0	0	0	0	1	0	0	0	0	0	0	0	1	0	1	0	0	0.2	0.25	0.15
Bacteroidetes_[G-3]	0	1	1	0	0	0	0	0	1	0	1	0	0	0	0	0	0	1	0	0	0	0	0	0	0	0	0	0	0	0	0	0	0	0	1	0	0	1	1	0	0.2	0.25	0.15
Finegoldia	0	0	0	0	0	0	0	0	0	1	0	1	1	1	0	0	1	1	0	0	1	0	0	0	0	0	0	0	0	0	0	0	0	0	0	0	1	0	0	0	0.2	0.3	0.1
Ruminococcaceae_[G-1]	0	0	0	0	0	0	0	0	0	0	0	0	0	0	0	0	0	1	0	0	0	1	0	0	0	1	0	1	1	0	0	0	0	0	1	1	1	0	0	0	0.2	0.05	0.35
Enterobacter	0	0	0	0	1	0	0	0	0	1	0	0	0	1	0	1	1	0	0	0	0	1	1	0	0	0	0	0	0	0	0	1	0	0	0	0	0	0	0	0	0.2	0.25	0.15
Olsenella	0	0	1	0	0	0	0	0	1	1	0	0	1	0	0	0	0	1	0	0	0	0	0	0	0	1	0	0	0	0	0	0	0	0	1	0	0	0	0	0	0.175	0.25	0.1
Bacteroides	0	0	0	0	1	0	0	0	1	0	1	1	0	1	0	0	0	1	0	0	0	0	0	0	1	0	0	0	0	0	0	0	0	0	0	0	0	0	0	0	0.175	0.3	0.05
Veillonella	0	0	0	0	0	0	0	0	0	0	0	0	0	0	0	0	0	0	0	0	0	0	0	1	0	0	1	0	1	1	0	0	0	1	0	0	0	1	0	1	0.175	0	0.35
Veillonellaceae_[G-1]	0	0	1	0	0	0	0	0	0	0	0	0	0	0	1	0	1	1	0	0	0	0	0	0	0	0	0	0	0	0	0	0	1	0	1	0	0	0	0	1	0.175	0.2	0.15
Streptobacillus	1	0	1	0	1	0	0	0	1	0	0	1	0	0	0	0	0	0	1	0	0	0	0	0	0	0	0	0	0	0	0	0	0	1	0	0	0	0	0	0	0.175	0.3	0.05
Afipia	0	1	0	0	0	0	0	1	1	0	0	1	1	0	0	1	0	0	0	0	0	0	0	0	0	0	0	0	0	0	0	1	0	0	0	0	0	0	0	0	0.175	0.3	0.05
TM7_[G-3]	0	0	0	0	0	0	0	0	1	0	0	0	0	0	0	0	0	0	1	0	0	0	1	0	0	0	0	0	1	0	0	0	1	1	0	0	0	0	0	1	0.175	0.1	0.25
Manihot	0	0	0	0	0	1	0	0	1	1	0	0	0	1	0	0	0	0	0	0	0	0	0	0	0	0	1	1	0	0	0	1	0	0	0	0	0	0	0	0	0.175	0.2	0.15
Lactobacillus	0	0	1	0	0	1	1	0	1	0	0	0	1	0	0	1	0	0	0	0	0	0	0	0	0	0	0	0	0	0	0	0	0	0	0	0	0	0	0	0	0.15	0.3	0
Shuttleworthia	0	1	0	0	0	0	0	0	1	0	1	0	0	0	0	0	0	1	1	0	0	0	0	0	0	0	0	1	0	0	0	0	0	0	0	0	0	0	0	0	0.15	0.25	0.05
Peptococcus	1	0	0	0	1	0	0	0	0	0	1	0	0	0	1	0	0	1	0	0	0	0	0	0	0	0	0	0	0	0	0	0	0	0	0	0	1	0	0	0	0.15	0.25	0.05
Peptostreptococcaceae_[XI][G-5]	0	0	0	0	0	0	0	0	1	0	1	0	0	0	0	0	1	0	0	0	0	0	0	0	0	0	0	0	0	0	0	0	0	1	1	0	0	0	1	0	0.15	0.15	0.15
Klebsiella	0	0	1	0	0	0	0	0	0	1	0	0	0	1	0	0	0	1	0	0	1	0	0	0	0	0	0	0	0	0	0	0	0	0	0	0	0	0	1	0	0.15	0.2	0.1
Propionibacterium	0	0	0	0	0	0	0	0	0	0	0	1	0	0	0	1	0	0	0	0	0	0	0	0	0	0	0	0	0	0	0	1	1	0	1	0	0	0	0	0	0.125	0.1	0.15
Slackia	0	0	0	0	0	0	0	0	1	0	0	1	0	0	0	0	0	1	0	0	0	0	0	0	0	0	0	0	0	0	0	1	0	0	1	0	0	0	0	0	0.125	0.15	0.1
Bacillus	0	0	0	0	0	0	0	1	0	0	0	0	0	0	0	0	1	0	0	0	0	0	0	0	0	0	0	0	0	0	1	0	0	0	0	0	0	1	0	1	0.125	0.1	0.15
Clostridiales_[G]	0	1	1	0	1	0	0	0	0	0	0	0	0	0	0	0	0	1	0	0	0	0	0	0	0	0	0	0	0	0	0	0	0	0	1	0	0	0	0	0	0.125	0.2	0.05
Anaerococcus	0	0	0	0	0	0	0	0	0	0	0	1	0	1	0	0	0	0	0	0	0	0	0	0	0	0	0	0	0	0	0	1	0	0	0	0	1	0	1	0	0.125	0.1	0.15
Peptoniphilus	0	1	0	0	0	0	0	0	0	0	1	0	1	0	0	0	1	1	0	0	0	0	0	0	0	0	0	0	0	0	0	0	0	0	0	0	0	0	0	0	0.125	0.25	0
Peptostreptococcaceae_[XI][G-6]	0	1	0	0	0	0	0	0	0	0	0	0	0	0	0	0	0	1	0	0	0	0	0	0	0	0	0	0	0	0	0	0	0	1	1	0	0	0	1	0	0.125	0.1	0.15
GN02_[G-1]	0	0	0	0	0	0	0	0	0	0	1	0	0	0	0	0	0	0	0	0	0	0	0	0	0	1	0	0	0	0	0	0	1	0	0	0	1	0	1	0	0.125	0.05	0.2
Alphaproteobacteria_[G]	0	1	0	0	1	0	0	0	1	0	0	1	0	0	0	0	0	1	0	0	0	0	0	0	0	0	0	0	0	0	0	0	0	0	0	0	0	0	0	0	0.125	0.25	0
Bradyrhizobium	0	1	0	0	0	0	0	1	0	0	0	0	1	0	0	0	0	0	0	0	0	0	0	0	0	0	1	0	0	0	0	1	0	0	0	0	0	0	0	0	0.125	0.15	0.1
Paracoccus	0	0	0	0	0	1	0	0	0	0	0	1	0	0	0	0	0	0	0	0	0	1	0	0	0	0	0	1	0	0	0	1	0	0	0	0	0	0	0	0	0.125	0.1	0.15
Ralstonia	0	1	0	0	0	0	0	1	0	0	0	0	1	0	0	0	0	0	0	0	0	0	0	0	0	0	0	1	0	0	1	0	0	0	0	0	0	0	0	0	0.125	0.15	0.1
Escherichia	0	0	0	0	0	0	0	1	0	1	0	1	0	0	0	1	0	0	0	0	0	0	0	0	0	0	0	0	0	0	1	0	0	0	0	0	0	0	0	0	0.125	0.2	0.05
Pyramidobacter	0	1	0	1	0	0	0	0	0	0	0	0	0	0	0	0	0	1	0	0	0	0	0	0	0	0	0	1	0	0	0	0	0	1	0	0	0	0	0	0	0.125	0.15	0.1
Brevibacterium	0	0	0	0	0	0	0	0	0	0	0	0	1	0	1	0	0	0	0	0	0	0	0	0	0	0	0	0	0	0	0	0	0	0	1	0	1	0	0	0	0.1	0.1	0.1
Kocuria	1	0	0	1	0	0	0	0	0	0	0	0	0	0	0	0	0	1	0	0	0	0	0	0	0	0	0	0	0	0	0	1	0	0	0	0	0	0	0	0	0.1	0.15	0.05
Bacteroidaceae_[G-1]	0	0	0	0	0	0	0	0	1	0	0	0	0	0	0	0	0	1	0	0	0	0	0	0	0	0	0	0	0	0	0	0	0	0	1	0	0	1	0	0	0.1	0.1	0.1
Anaerolineae_[G-1]	0	0	1	0	0	0	0	0	1	0	0	0	0	0	0	0	0	0	0	0	0	0	0	0	0	0	0	0	0	0	0	0	0	0	1	0	0	1	0	0	0.1	0.1	0.1
Meiothermus	0	0	1	0	0	1	0	0	1	0	0	0	0	1	0	0	0	0	0	0	0	0	0	0	0	0	0	0	0	0	0	0	0	0	0	0	0	0	0	0	0.1	0.2	0
Enterococcus	0	0	0	0	0	0	0	0	0	1	0	0	0	1	0	1	1	0	0	0	0	0	0	0	0	0	0	0	0	0	0	0	0	0	0	0	0	0	0	0	0.1	0.2	0
Butyrivibrio	0	0	0	0	1	0	0	0	0	0	0	1	0	0	1	0	0	1	0	0	0	0	0	0	0	0	0	0	0	0	0	0	0	0	0	0	0	0	0	0	0.1	0.2	0
Peptostreptococcaceae_[G]	0	1	0	0	0	0	0	0	0	0	1	1	0	0	0	0	0	1	0	0	0	0	0	0	0	0	0	0	0	0	0	0	0	0	0	0	0	0	0	0	0.1	0.2	0
Methylobacterium	1	1	0	1	0	0	0	1	0	0	0	0	0	0	0	0	0	0	0	0	0	0	0	0	0	0	0	0	0	0	0	0	0	0	0	0	0	0	0	0	0.1	0.2	0
Brevundimonas	0	0	0	1	0	0	0	0	1	0	0	1	0	0	0	0	0	0	0	0	0	0	0	0	0	0	0	0	0	0	0	1	0	0	0	0	0	0	0	0	0.1	0.15	0.05
Betaproteobacteria_[G]	0	0	0	0	0	0	0	0	0	0	0	0	0	0	0	0	1	0	0	0	1	0	0	0	0	0	0	0	0	0	0	1	0	0	0	0	0	0	1	0	0.1	0.05	0.15
Diaphorobacter	0	0	0	0	0	0	0	0	0	0	0	0	0	0	0	0	0	0	0	0	0	0	0	0	0	0	0	1	0	1	0	1	0	0	0	0	0	0	1	0	0.1	0	0.2
Massilia	0	0	1	0	0	0	0	0	0	0	0	0	0	0	0	0	1	1	0	1	0	0	0	0	0	0	0	0	0	0	0	0	0	0	0	0	0	0	0	0	0.1	0.2	0
Propionivibrio	0	0	0	0	0	0	0	0	1	0	1	0	0	0	0	0	0	0	0	0	0	0	0	0	0	1	0	0	0	0	0	0	1	0	0	0	0	0	0	0	0.1	0.1	0.1
Citrobacter	0	0	0	0	0	0	0	0	0	1	0	1	0	1	0	1	0	0	0	0	0	0	0	0	0	0	0	0	0	0	0	0	0	0	0	0	0	0	0	0	0.1	0.2	0
Treponema	0	0	0	0	1	0	1	0	0	0	0	0	0	0	0	0	0	0	0	0	0	0	0	0	0	0	0	1	0	0	0	0	0	0	1	0	0	0	0	0	0.1	0.1	0.1
Actinomycetales_[G]	0	0	0	0	0	0	0	0	0	0	0	0	0	0	0	0	0	0	0	0	0	1	0	0	0	0	0	0	0	0	0	1	0	0	0	0	1	0	0	0	0.075	0	0.15
Dietzia	0	1	0	0	0	0	0	0	0	0	0	0	0	1	0	0	0	1	0	0	0	0	0	0	0	0	0	0	0	0	0	0	0	0	0	0	0	0	0	0	0.075	0.15	0
Geodermatophilus	0	0	1	0	0	0	0	0	0	0	0	0	0	0	0	0	0	1	0	0	0	0	0	0	0	0	0	0	0	0	0	1	0	0	0	0	0	0	0	0	0.075	0.1	0.05
Janibacter	1	0	1	0	0	1	0	0	0	0	0	0	0	0	0	0	0	0	0	0	0	0	0	0	0	0	0	0	0	0	0	0	0	0	0	0	0	0	0	0	0.075	0.15	0
Flavitalea	0	1	0	1	0	0	0	1	0	0	0	0	0	0	0	0	0	0	0	0	0	0	0	0	0	0	0	0	0	0	0	0	0	0	0	0	0	0	0	0	0.075	0.15	0
Pedobacter	0	0	0	1	0	0	0	0	0	0	0	0	0	0	0	0	0	0	0	0	0	1	0	0	0	0	0	0	0	0	0	1	0	0	0	0	0	0	0	0	0.075	0.05	0.1
Allobaculum	0	0	0	0	0	0	0	0	0	0	0	0	0	0	0	0	0	0	0	0	0	0	0	0	0	0	0	0	1	0	0	0	1	0	0	1	0	0	0	0	0.075	0	0.15
Bulleidia	1	1	0	0	1	0	0	0	0	0	0	0	0	0	0	0	0	0	0	0	0	0	0	0	0	0	0	0	0	0	0	0	0	0	0	0	0	0	0	0	0.075	0.15	0
Eggerthia	0	1	0	0	0	0	0	0	0	0	0	0	0	0	0	0	0	1	0	0	0	0	0	0	0	0	0	0	0	0	0	0	0	0	1	0	0	0	0	0	0.075	0.1	0.05
Erysipelotrichaceae_[G-1]	0	0	0	0	0	0	0	0	1	0	0	0	0	0	0	0	0	1	0	0	0	0	0	0	0	0	0	0	0	0	0	0	0	0	1	0	0	0	0	0	0.075	0.1	0.05
Firmicutes_[G]	0	0	0	0	0	0	0	0	0	0	0	0	0	0	0	0	0	0	1	0	0	0	0	0	0	1	0	0	0	0	0	0	0	0	0	0	0	0	1	0	0.075	0.05	0.1
Porphyrobacter	0	0	0	0	0	1	0	0	0	0	0	0	0	0	0	0	0	0	0	0	0	0	0	0	1	0	0	0	0	0	0	1	0	0	0	0	0	0	0	0	0.075	0.05	0.1
Sphingobium	0	1	0	0	0	0	0	1	0	0	0	0	0	0	0	0	0	0	0	0	0	0	0	0	0	0	0	0	0	0	0	1	0	0	0	0	0	0	0	0	0.075	0.1	0.05
Achromobacter	0	0	0	0	0	0	0	0	1	0	0	0	0	1	0	0	0	1	0	0	0	0	0	0	0	0	0	0	0	0	0	0	0	0	0	0	0	0	0	0	0.075	0.15	0
Alcaligenes	1	0	0	0	0	1	1	0	0	0	0	0	0	0	0	0	0	0	0	0	0	0	0	0	0	0	0	0	0	0	0	0	0	0	0	0	0	0	0	0	0.075	0.15	0
Schlegelella	0	0	0	0	0	0	0	0	0	0	0	0	0	0	0	0	1	0	0	0	0	0	0	0	0	0	0	0	0	0	0	1	0	0	0	0	0	0	1	0	0.075	0.05	0.1
Cupriavidus	0	1	0	0	0	0	0	1	0	0	0	0	0	1	0	0	0	0	0	0	0	0	0	0	0	0	0	0	0	0	0	0	0	0	0	0	0	0	0	0	0.075	0.15	0
Actinobaculum	0	0	0	0	0	0	0	0	0	0	0	0	0	0	0	0	0	0	0	0	0	0	0	0	0	0	0	0	0	0	0	1	0	0	0	0	0	0	1	0	0.05	0	0.1
Arcanobacterium	0	0	0	0	0	0	0	0	0	0	1	1	0	0	0	0	0	0	0	0	0	0	0	0	0	0	0	0	0	0	0	0	0	0	0	0	0	0	0	0	0.05	0.1	0
Brachybacterium	0	1	0	0	0	0	0	0	0	0	0	0	0	0	0	0	0	1	0	0	0	0	0	0	0	0	0	0	0	0	0	0	0	0	0	0	0	0	0	0	0.05	0.1	0
Microbacterium	0	0	0	0	0	0	0	0	0	0	0	0	0	0	0	0	0	0	0	0	0	0	0	0	0	0	1	0	0	0	0	0	0	0	0	0	0	0	0	1	0.05	0	0.1
Renibacterium	0	0	0	0	0	0	0	0	0	0	0	0	0	0	0	0	0	0	0	0	0	0	1	1	0	0	0	0	0	0	0	0	0	0	0	0	0	0	0	0	0.05	0	0.1
Gardnerella	0	0	0	0	0	0	0	0	0	0	0	0	0	0	0	0	0	1	0	0	0	0	0	0	0	0	0	0	0	0	0	0	0	0	0	0	0	1	0	0	0.05	0.05	0.05
Nesterenkonia	0	0	1	0	0	0	0	0	0	0	1	0	0	0	0	0	0	0	0	0	0	0	0	0	0	0	0	0	0	0	0	0	0	0	0	0	0	0	0	0	0.05	0.1	0
Cryptobacterium	0	0	0	0	0	1	0	0	0	0	0	0	0	0	0	0	0	0	0	0	0	0	0	0	0	0	0	0	0	0	0	0	0	1	0	0	0	0	0	0	0.05	0.05	0.05
Bacteroidetes_[G-6]	0	1	0	0	0	0	0	0	0	0	0	0	0	0	0	0	0	1	0	0	0	0	0	0	0	0	0	0	0	0	0	0	0	0	0	0	0	0	0	0	0.05	0.1	0
Dysgonomonas	0	0	0	0	0	0	0	0	1	0	0	0	0	0	0	0	0	0	0	0	0	0	0	0	0	0	0	0	0	0	1	0	0	0	0	0	0	0	0	0	0.05	0.05	0.05
Sphaerobacter	1	0	0	0	0	0	0	0	0	0	0	0	1	0	0	0	0	0	0	0	0	0	0	0	0	0	0	0	0	0	0	0	0	0	0	0	0	0	0	0	0.05	0.1	0
Deinococcus	0	0	0	0	0	1	0	0	0	0	0	0	0	0	0	0	0	0	0	0	0	0	0	0	0	0	0	1	0	0	0	0	0	0	0	0	0	0	0	0	0.05	0.05	0.05
Exiguobacterium	0	1	0	0	0	0	0	0	0	0	0	0	0	0	0	0	0	0	0	0	0	0	0	0	0	0	0	0	0	0	0	0	0	0	0	0	0	0	1	0	0.05	0.05	0.05
Dolosigranulum	0	0	0	1	0	0	0	0	0	0	0	0	0	0	0	1	0	0	0	0	0	0	0	0	0	0	0	0	0	0	0	0	0	0	0	0	0	0	0	0	0.05	0.1	0
Lactococcus	0	0	0	0	0	0	0	0	0	1	0	0	0	0	0	0	0	0	0	0	0	0	0	0	0	0	0	0	0	0	0	1	0	0	0	0	0	0	0	0	0.05	0.05	0.05
Coprococcus	0	0	0	0	0	0	0	0	0	0	0	0	0	0	0	0	1	0	0	0	0	0	0	0	0	0	0	0	0	0	0	0	0	0	0	0	0	1	0	0	0.05	0.05	0.05
Peptoclostridium	0	0	0	0	1	0	0	0	0	0	0	0	0	0	0	0	0	0	1	0	0	0	0	0	0	0	0	0	0	0	0	0	0	0	0	0	0	0	0	0	0.05	0.1	0
Caulobacter	0	0	1	0	0	0	0	0	0	0	0	0	0	0	0	0	0	0	0	0	0	0	0	0	0	0	0	0	0	0	0	1	0	0	0	0	0	0	0	0	0.05	0.05	0.05
Rhodobacter	0	0	0	0	0	0	0	0	0	0	0	0	0	1	0	0	0	0	0	0	0	0	0	0	0	0	0	0	0	0	0	1	0	0	0	0	0	0	0	0	0.05	0.05	0.05
Altererythrobacter	0	0	0	0	0	0	0	0	0	0	0	1	0	0	0	0	0	0	0	0	0	0	0	0	0	0	0	0	0	0	0	1	0	0	0	0	0	0	0	0	0.05	0.05	0.05
Sphingopyxis	0	1	0	0	0	0	0	1	0	0	0	0	0	0	0	0	0	0	0	0	0	0	0	0	0	0	0	0	0	0	0	0	0	0	0	0	0	0	0	0	0.05	0.1	0
Burkholderia	0	1	0	0	0	0	0	1	0	0	0	0	0	0	0	0	0	0	0	0	0	0	0	0	0	0	0	0	0	0	0	0	0	0	0	0	0	0	0	0	0.05	0.1	0
Burkholderiales_[G]	0	0	0	0	0	0	1	0	0	0	0	0	0	0	0	0	0	0	0	0	0	0	0	0	0	0	0	0	0	0	0	1	0	0	0	0	0	0	0	0	0.05	0.05	0.05
Chromobacterium	0	0	0	0	0	0	0	0	0	0	0	0	0	0	0	0	0	0	0	0	0	0	0	0	0	0	0	0	1	0	1	0	0	0	0	0	0	0	0	0	0.05	0	0.1
Simonsiella	0	0	0	0	0	0	0	0	0	0	0	0	0	0	0	0	0	0	0	0	0	0	0	0	1	1	0	0	0	0	0	0	0	0	0	0	0	0	0	0	0.05	0	0.1
Aeromonas	1	0	0	0	0	0	0	0	0	0	0	0	0	0	0	1	0	0	0	0	0	0	0	0	0	0	0	0	0	0	0	0	0	0	0	0	0	0	0	0	0.05	0.1	0
Morganella	0	0	0	0	0	0	0	0	0	0	0	0	0	1	0	1	0	0	0	0	0	0	0	0	0	0	0	0	0	0	0	0	0	0	0	0	0	0	0	0	0.05	0.1	0
Proteus	0	0	0	0	0	0	0	0	0	0	0	0	0	1	0	1	0	0	0	0	0	0	0	0	0	0	0	0	0	0	0	0	0	0	0	0	0	0	0	0	0.05	0.1	0
Psychrobacter	0	1	0	0	0	0	0	0	0	0	0	0	0	1	0	0	0	0	0	0	0	0	0	0	0	0	0	0	0	0	0	0	0	0	0	0	0	0	0	0	0.05	0.1	0
Candidatus_Phytoplasma	0	0	0	0	0	0	0	0	1	0	0	0	0	0	0	0	0	1	0	0	0	0	0	0	0	0	0	0	0	0	0	0	0	0	0	0	0	0	0	0	0.05	0.1	0
Calycanthus	0	0	0	0	0	0	0	0	0	0	0	0	0	0	0	0	0	0	0	0	0	0	0	0	0	0	0	1	0	0	0	1	0	0	0	0	0	0	0	0	0.05	0	0.1
Mobiluncus	0	0	0	0	0	0	0	0	0	0	0	0	0	1	0	0	0	0	0	0	0	0	0	0	0	0	0	0	0	0	0	0	0	0	0	0	0	0	0	0	0.025	0.05	0
Blastococcus	0	0	0	0	0	0	0	0	0	0	0	0	0	0	0	0	0	0	0	0	0	0	0	0	0	0	0	1	0	0	0	0	0	0	0	0	0	0	0	0	0.025	0	0.05
Gordonia	0	0	0	0	0	0	0	0	0	0	0	0	0	0	0	0	0	0	0	0	0	0	0	0	0	0	0	0	0	0	0	1	0	0	0	0	0	0	0	0	0.025	0	0.05
Agrococcus	0	0	0	0	0	0	0	0	0	0	1	0	0	0	0	0	0	0	0	0	0	0	0	0	0	0	0	0	0	0	0	0	0	0	0	0	0	0	0	0	0.025	0.05	0
Arthrobacter	0	0	0	0	0	1	0	0	0	0	0	0	0	0	0	0	0	0	0	0	0	0	0	0	0	0	0	0	0	0	0	0	0	0	0	0	0	0	0	0	0.025	0.05	0
Parascardovia	0	0	0	0	0	0	0	0	0	0	0	0	0	0	0	0	0	0	0	0	0	0	0	1	0	0	0	0	0	0	0	0	0	0	0	0	0	0	0	0	0.025	0	0.05
Mycobacterium	0	0	0	0	0	0	0	0	0	0	0	0	0	0	0	0	0	0	0	0	0	0	0	0	0	0	0	0	0	0	0	1	0	0	0	0	0	0	0	0	0.025	0	0.05
Dermabacter	0	0	0	0	0	0	0	0	0	0	0	0	0	0	0	0	0	0	0	0	0	0	0	0	0	0	0	0	0	0	0	1	0	0	0	0	0	0	0	0	0.025	0	0.05
Arsenicicoccus	0	0	0	0	0	0	0	0	0	0	0	0	0	0	0	0	0	0	0	0	0	0	0	0	0	0	0	0	0	0	0	0	0	0	0	1	0	0	0	0	0.025	0	0.05
Knoellia	0	0	0	0	0	0	0	0	0	0	0	0	0	0	0	0	0	0	0	0	0	0	0	0	0	0	0	0	0	0	0	0	0	0	0	0	1	0	0	0	0.025	0	0.05
Chryseoglobus	0	1	0	0	0	0	0	0	0	0	0	0	0	0	0	0	0	0	0	0	0	0	0	0	0	0	0	0	0	0	0	0	0	0	0	0	0	0	0	0	0.025	0.05	0
Cryobacterium	0	0	0	0	0	0	0	0	0	0	0	0	0	0	0	0	0	0	0	0	0	0	0	0	0	0	0	0	0	0	1	0	0	0	0	0	0	0	0	0	0.025	0	0.05
Arthrobacter	0	0	0	0	0	1	0	0	0	0	0	0	0	0	0	0	0	0	0	0	0	0	0	0	0	0	0	0	0	0	0	0	0	0	0	0	0	0	0	0	0.025	0.05	0
Glutamicibacter	0	0	0	0	0	0	0	0	0	0	0	0	0	0	0	0	0	0	0	0	0	0	0	0	0	1	0	0	0	0	0	0	0	0	0	0	0	0	0	0	0.025	0	0.05
Pseudonocardia	0	0	0	0	0	0	0	0	0	0	0	0	0	0	0	0	0	1	0	0	0	0	0	0	0	0	0	0	0	0	0	0	0	0	0	0	0	0	0	0	0.025	0.05	0
Coriobacterium	0	0	0	0	0	0	0	0	0	0	0	0	0	0	0	0	0	0	0	0	0	0	0	0	0	0	0	0	0	0	0	0	0	0	0	0	0	0	0	1	0.025	0	0.05
Eggerthella	0	0	0	0	0	0	0	0	0	0	0	0	0	0	0	0	0	1	0	0	0	0	0	0	0	0	0	0	0	0	0	0	0	0	0	0	0	0	0	0	0.025	0.05	0
Porphyromonas	0	0	0	0	0	0	0	0	0	0	0	0	0	0	0	0	0	0	0	0	0	0	0	0	1	0	0	0	0	0	0	0	0	0	0	0	0	0	0	0	0.025	0	0.05
Bergeyella	0	0	0	0	0	0	0	0	0	0	0	0	0	0	0	0	0	0	0	0	0	0	0	0	0	0	0	0	0	0	0	1	0	0	0	0	0	0	0	0	0.025	0	0.05
Capnocytophaga	0	0	0	0	0	0	0	0	0	0	0	0	0	0	0	0	0	0	0	0	0	0	0	0	0	0	0	0	0	0	1	0	0	0	0	0	0	0	0	0	0.025	0	0.05
Chryseobacterium	0	0	0	0	0	0	0	0	0	0	0	0	0	0	1	0	0	0	0	0	0	0	0	0	0	0	0	0	0	0	0	0	0	0	0	0	0	0	0	0	0.025	0.05	0
Caldilinea	0	0	0	0	0	0	0	0	0	0	0	0	0	0	0	0	0	1	0	0	0	0	0	0	0	0	0	0	0	0	0	0	0	0	0	0	0	0	0	0	0.025	0.05	0
Parageobacillus	0	0	0	0	0	0	1	0	0	0	0	0	0	0	0	0	0	0	0	0	0	0	0	0	0	0	0	0	0	0	0	0	0	0	0	0	0	0	0	0	0.025	0.05	0
Paenibacillus	1	0	0	0	0	0	0	0	0	0	0	0	0	0	0	0	0	0	0	0	0	0	0	0	0	0	0	0	0	0	0	0	0	0	0	0	0	0	0	0	0.025	0.05	0
Aliicoccus	0	0	0	0	0	0	0	0	0	0	0	0	0	0	0	0	0	0	0	0	0	0	0	0	0	0	0	0	0	0	0	0	0	0	0	0	0	1	0	0	0.025	0	0.05
Leuconostoc	0	0	0	0	0	0	0	0	0	1	0	0	0	0	0	0	0	0	0	0	0	0	0	0	0	0	0	0	0	0	0	0	0	0	0	0	0	0	0	0	0.025	0.05	0
Clostridiales_[F-1][G-2]	0	0	0	0	0	0	0	0	0	0	0	0	0	0	0	0	0	1	0	0	0	0	0	0	0	0	0	0	0	0	0	0	0	0	0	0	0	0	0	0	0.025	0.05	0
Pseudoramibacter	0	0	0	0	0	0	0	0	0	0	0	0	0	0	0	0	0	1	0	0	0	0	0	0	0	0	0	0	0	0	0	0	0	0	0	0	0	0	0	0	0.025	0.05	0
Eubacterium_[XI][G]	0	0	1	0	0	0	0	0	0	0	0	0	0	0	0	0	0	0	0	0	0	0	0	0	0	0	0	0	0	0	0	0	0	0	0	0	0	0	0	0	0.025	0.05	0
Cellulosilyticum	0	0	0	0	1	0	0	0	0	0	0	0	0	0	0	0	0	0	0	0	0	0	0	0	0	0	0	0	0	0	0	0	0	0	0	0	0	0	0	0	0.025	0.05	0
Butyrivibrio	0	0	0	0	1	0	0	0	0	0	0	0	0	0	0	0	0	0	0	0	0	0	0	0	0	0	0	0	0	0	0	0	0	0	0	0	0	0	0	0	0.025	0.05	0
Lacnoclostridium	0	0	0	0	0	0	0	0	0	0	0	0	0	0	0	0	0	0	0	0	0	0	0	0	0	1	0	0	0	0	0	0	0	0	0	0	0	0	0	0	0.025	0	0.05
Desulfotomaculum	0	0	0	0	0	0	0	0	0	0	0	0	0	0	0	0	0	0	0	0	0	0	0	0	0	1	0	0	0	0	0	0	0	0	0	0	0	0	0	0	0.025	0	0.05
Peptoniphilaceae_[G-1]	0	0	0	0	0	0	0	0	0	0	1	0	0	0	0	0	0	0	0	0	0	0	0	0	0	0	0	0	0	0	0	0	0	0	0	0	0	0	0	0	0.025	0.05	0
Peptoniphilaceae_[G-2]	0	0	0	0	0	0	0	0	0	0	0	0	0	0	0	0	0	1	0	0	0	0	0	0	0	0	0	0	0	0	0	0	0	0	0	0	0	0	0	0	0.025	0.05	0
Peptoniphilaceae_[G-3]	0	0	0	0	0	0	0	0	0	0	0	0	0	0	0	0	0	1	0	0	0	0	0	0	0	0	0	0	0	0	0	0	0	0	0	0	0	0	0	0	0.025	0.05	0
Peptoclostridium	0	0	0	0	0	0	0	0	0	0	0	0	0	0	0	0	0	0	0	0	0	0	0	0	0	0	0	0	0	0	1	0	0	0	0	0	0	0	0	0	0.025	0	0.05
Peptostreptococcaceae_[XI][G-3]	0	0	0	0	0	0	0	0	0	0	0	0	0	0	0	0	0	1	0	0	0	0	0	0	0	0	0	0	0	0	0	0	0	0	0	0	0	0	0	0	0.025	0.05	0
Peptostreptococcaceae_[XI][G-8]	0	0	0	0	0	0	0	0	0	0	0	0	0	0	0	0	0	0	0	0	0	0	0	0	0	0	0	0	0	0	0	0	0	0	1	0	0	0	0	0	0.025	0	0.05
multigenus	0	0	0	0	0	0	0	0	0	0	0	0	0	0	0	0	0	1	0	0	0	0	0	0	0	0	0	0	0	0	0	0	0	0	0	0	0	0	0	0	0.025	0.05	0
Acetivibrio	0	0	0	0	1	0	0	0	0	0	0	0	0	0	0	0	0	0	0	0	0	0	0	0	0	0	0	0	0	0	0	0	0	0	0	0	0	0	0	0	0.025	0.05	0
Bacteroides	0	0	0	0	0	0	0	0	0	0	0	0	0	0	0	0	0	0	0	0	0	0	0	0	0	1	0	0	0	0	0	0	0	0	0	0	0	0	0	0	0.025	0	0.05
Ruminoclostridium	0	0	0	0	0	0	0	0	0	0	0	0	0	0	0	0	0	0	0	0	0	0	0	0	0	0	0	0	0	0	0	0	0	0	0	0	0	1	0	0	0.025	0	0.05
Ruminococcaceae_[G-3]	0	0	0	0	0	0	0	0	0	0	0	0	1	0	0	0	0	0	0	0	0	0	0	0	0	0	0	0	0	0	0	0	0	0	0	0	0	0	0	0	0.025	0.05	0
Syntrophomonas	0	0	0	0	0	0	0	0	0	0	0	0	0	0	0	0	0	0	0	0	0	0	0	0	0	0	0	0	0	0	0	0	0	0	0	0	0	0	1	0	0.025	0	0.05
Selenomonas	0	1	0	0	0	0	0	0	0	0	0	0	0	0	0	0	0	0	0	0	0	0	0	0	0	0	0	0	0	0	0	0	0	0	0	0	0	0	0	0	0.025	0.05	0
Tissierella	0	0	0	0	0	0	0	0	1	0	0	0	0	0	0	0	0	0	0	0	0	0	0	0	0	0	0	0	0	0	0	0	0	0	0	0	0	0	0	0	0.025	0.05	0
Mollicutes_[G-1]	0	0	0	0	1	0	0	0	0	0	0	0	0	0	0	0	0	0	0	0	0	0	0	0	0	0	0	0	0	0	0	0	0	0	0	0	0	0	0	0	0.025	0.05	0
Anaeroglobus	0	0	0	0	0	0	0	0	0	0	0	0	0	0	0	0	1	0	0	0	0	0	0	0	0	0	0	0	0	0	0	0	0	0	0	0	0	0	0	0	0.025	0.05	0
Mitsuokella	0	0	0	0	0	0	0	0	0	0	0	0	0	0	0	0	0	0	0	0	0	0	0	0	0	0	0	0	0	0	0	0	0	0	0	0	0	1	0	0	0.025	0	0.05
Dialister	0	0	0	0	0	0	0	0	0	0	0	0	0	1	0	0	0	0	0	0	0	0	0	0	0	0	0	0	0	0	0	0	0	0	0	0	0	0	0	0	0.025	0.05	0
Anaerococcus	0	0	0	0	0	0	0	0	0	0	0	1	0	0	0	0	0	0	0	0	0	0	0	0	0	0	0	0	0	0	0	0	0	0	0	0	0	0	0	0	0.025	0.05	0
Peptoniphilus	0	0	0	0	0	0	0	0	0	0	0	0	0	1	0	0	0	0	0	0	0	0	0	0	0	0	0	0	0	0	0	0	0	0	0	0	0	0	0	0	0.025	0.05	0
Cetobacterium	0	0	0	0	0	0	0	0	0	0	0	0	0	0	0	0	0	0	0	0	0	0	0	0	0	0	0	0	0	0	0	0	0	0	0	0	0	0	0	1	0.025	0	0.05
Propionigenium	0	1	0	0	0	0	0	0	0	0	0	0	0	0	0	0	0	0	0	0	0	0	0	0	0	0	0	0	0	0	0	0	0	0	0	0	0	0	0	0	0.025	0.05	0
Sneathia	0	0	0	0	0	0	0	0	0	0	0	0	0	0	0	0	0	1	0	0	0	0	0	0	0	0	0	0	0	0	0	0	0	0	0	0	0	0	0	0	0.025	0.05	0
Bosea	0	0	0	1	0	0	0	0	0	0	0	0	0	0	0	0	0	0	0	0	0	0	0	0	0	0	0	0	0	0	0	0	0	0	0	0	0	0	0	0	0.025	0.05	0
Novosphingobium	1	0	0	0	0	0	0	0	0	0	0	0	0	0	0	0	0	0	0	0	0	0	0	0	0	0	0	0	0	0	0	0	0	0	0	0	0	0	0	0	0.025	0.05	0
Castellaniella	0	0	0	0	0	0	0	0	0	0	0	0	0	0	0	0	0	0	0	0	0	0	0	0	0	0	0	0	0	0	0	1	0	0	0	0	0	0	0	0	0.025	0	0.05
Comamonadaceae_[G]	0	0	0	0	0	0	0	0	0	0	0	0	1	0	0	0	0	0	0	0	0	0	0	0	0	0	0	0	0	0	0	0	0	0	0	0	0	0	0	0	0.025	0.05	0
Comamonas	0	0	0	0	0	0	0	0	0	0	0	0	0	0	0	0	0	0	0	0	0	0	0	0	0	0	0	0	0	0	0	1	0	0	0	0	0	0	0	0	0.025	0	0.05
Hydrogenophaga	0	0	0	0	0	0	0	0	0	0	0	0	0	0	0	0	0	0	0	0	0	0	0	0	0	0	0	1	0	0	0	0	0	0	0	0	0	0	0	0	0.025	0	0.05
Leptothrix	0	0	0	0	0	0	0	0	0	0	0	0	0	0	0	0	0	0	0	0	0	0	0	0	0	0	0	0	0	0	0	1	0	0	0	0	0	0	0	0	0.025	0	0.05
Variovorax	0	0	0	0	0	0	0	0	0	0	0	0	0	0	0	0	0	0	0	0	0	0	0	0	0	0	0	0	0	0	0	0	1	0	0	0	0	0	0	0	0.025	0	0.05
Aquabacterium	0	0	0	0	0	0	0	0	0	0	0	0	0	0	0	0	0	0	0	0	0	0	0	0	0	0	0	1	0	0	0	0	0	0	0	0	0	0	0	0	0.025	0	0.05
Aquincola	1	0	0	0	0	0	0	0	0	0	0	0	0	0	0	0	0	0	0	0	0	0	0	0	0	0	0	0	0	0	0	0	0	0	0	0	0	0	0	0	0.025	0.05	0
Herbaspirillum	0	0	0	0	1	0	0	0	0	0	0	0	0	0	0	0	0	0	0	0	0	0	0	0	0	0	0	0	0	0	0	0	0	0	0	0	0	0	0	0	0.025	0.05	0
Oxalobacteraceae_[G]	0	0	0	0	0	0	0	0	0	0	0	0	0	0	0	0	0	0	0	0	0	0	0	0	0	0	0	0	0	0	0	0	0	0	0	0	1	0	0	0	0.025	0	0.05
Methyloversatilis	0	0	0	1	0	0	0	0	0	0	0	0	0	0	0	0	0	0	0	0	0	0	0	0	0	0	0	0	0	0	0	0	0	0	0	0	0	0	0	0	0.025	0.05	0
Desulfomicrobium	0	0	1	0	0	0	0	0	0	0	0	0	0	0	0	0	0	0	0	0	0	0	0	0	0	0	0	0	0	0	0	0	0	0	0	0	0	0	0	0	0.025	0.05	0
Desulfovibrio	0	0	0	0	0	0	0	0	1	0	0	0	0	0	0	0	0	0	0	0	0	0	0	0	0	0	0	0	0	0	0	0	0	0	0	0	0	0	0	0	0.025	0.05	0
Arcobacter	0	0	0	0	0	0	0	0	1	0	0	0	0	0	0	0	0	0	0	0	0	0	0	0	0	0	0	0	0	0	0	0	0	0	0	0	0	0	0	0	0.025	0.05	0
Helicobacter	0	0	0	0	0	0	0	0	0	0	0	0	0	0	0	0	0	0	0	0	0	0	0	0	0	0	0	0	0	0	0	0	0	0	1	0	0	0	0	0	0.025	0	0.05
Rheinheimera	0	0	0	0	0	0	1	0	0	0	0	0	0	0	0	0	0	0	0	0	0	0	0	0	0	0	0	0	0	0	0	0	0	0	0	0	0	0	0	0	0.025	0.05	0
Citrobacter	0	0	0	0	0	0	0	0	0	1	0	0	0	0	0	0	0	0	0	0	0	0	0	0	0	0	0	0	0	0	0	0	0	0	0	0	0	0	0	0	0.025	0.05	0
Enterobacter	0	0	0	0	0	0	0	0	0	1	0	0	0	0	0	0	0	0	0	0	0	0	0	0	0	0	0	0	0	0	0	0	0	0	0	0	0	0	0	0	0.025	0.05	0
Pseudocitrobacter	0	0	0	0	0	0	0	0	0	1	0	0	0	0	0	0	0	0	0	0	0	0	0	0	0	0	0	0	0	0	0	0	0	0	0	0	0	0	0	0	0.025	0.05	0
Rosenbergiella	0	0	0	0	0	0	0	0	0	0	0	0	0	0	0	0	1	0	0	0	0	0	0	0	0	0	0	0	0	0	0	0	0	0	0	0	0	0	0	0	0.025	0.05	0
Tatumella	0	0	0	0	0	0	0	0	0	1	0	0	0	0	0	0	0	0	0	0	0	0	0	0	0	0	0	0	0	0	0	0	0	0	0	0	0	0	0	0	0.025	0.05	0
Erwinia	0	0	0	0	0	0	0	0	0	1	0	0	0	0	0	0	0	0	0	0	0	0	0	0	0	0	0	0	0	0	0	0	0	0	0	0	0	0	0	0	0.025	0.05	0
Morganella	0	0	0	0	0	0	0	0	0	0	0	0	0	0	0	1	0	0	0	0	0	0	0	0	0	0	0	0	0	0	0	0	0	0	0	0	0	0	0	0	0.025	0.05	0
Salmonella	0	0	0	0	0	0	0	0	0	1	0	0	0	0	0	0	0	0	0	0	0	0	0	0	0	0	0	0	0	0	0	0	0	0	0	0	0	0	0	0	0.025	0.05	0
multigenus	0	0	0	0	0	0	0	0	0	1	0	0	0	0	0	0	0	0	0	0	0	0	0	0	0	0	0	0	0	0	0	0	0	0	0	0	0	0	0	0	0.025	0.05	0
Zymobacter	0	0	0	0	0	0	0	0	0	0	0	0	0	0	0	0	0	0	0	0	0	0	0	0	0	0	0	0	0	0	0	1	0	0	0	0	0	0	0	0	0.025	0	0.05
Pseudoxanthomonas	0	0	0	0	0	0	0	0	0	0	0	0	0	0	0	0	0	1	0	0	0	0	0	0	0	0	0	0	0	0	0	0	0	0	0	0	0	0	0	0	0.025	0.05	0
TM7_[G]	0	0	0	0	0	0	0	0	0	0	1	0	0	0	0	0	0	0	0	0	0	0	0	0	0	0	0	0	0	0	0	0	0	0	0	0	0	0	0	0	0.025	0.05	0
TM7_[G-4]	0	0	0	0	0	0	0	0	0	0	0	0	0	0	1	0	0	0	0	0	0	0	0	0	0	0	0	0	0	0	0	0	0	0	0	0	0	0	0	0	0.025	0.05	0
Number of genera identified	65	73	61	50	63	45	58	54	88	29	68	75	52	48	60	33	55	100	50	32	33	36	33	21	44	52	39	64	39	42	41	74	49	52	73	45	50	62	72	41	259	217	173
