# Supplementary material for: Inflammatory Bacteriome Featuring <em>Fusobacterium nucleatum</em> and <em>Pseudomonas aeruginosa </em>Identified in Association with Oral Squamous Cell Carcinoma<strong></strong>
Source: Preprints.org preprint supplement (doi:10.20944/preprints201703.0024.v1), 2017-03-06
Supplement: Supplementary file 3 [file S3. Species abundances and Frequencies.xls]

## Sheet: Abundance
Abundances of species
Status	Cancer	Cancer	Cancer	Cancer	Cancer	Cancer	Cancer	Cancer	Cancer	Cancer	Cancer	Cancer	Cancer	Cancer	Cancer	Cancer	Cancer	Cancer	Cancer	Cancer	Control	Control	Control	Control	Control	Control	Control	Control	Control	Control	Control	Control	Control	Control	Control	Control	Control	Control	Control	Control	Overall	OSCC	Control
ID	C1	C2	C3	C4	C5	C6	C7	C8	C9	C10	C11	C12	C13	C14	C15	C16	C17	C18	C19	C20	N1	N2	N3	N4	N5	N6	N7	N8	N9	N10	N11	N12	N13	N14	N15	N16	N17	N18	N19	N20
Streptococcus mitis	0.00392452	7.1e-05	0.00442336	0.038019	0.000170867	0.169231	0.0044462	0.000164325	0.00119048	0.077852	0.0136372	0.0114626	0.000707368	0.0057995	0.0008127	0.0156307	0.22462	0.00210921	0.000739477	0.0116836	0.651266	0.398192	0.00115518	0.000246245	0.200152	0.020256	0.0155557	0.229155	0.010657	0.210135	0.00216073	0.00620077	0.00893637	0.00468227	0.0924088	0.0153731	0.160131	0.0111515	0.405396	0.000105899	0.0757503	0.0293347	0.0943184
Rothia mucilaginosa	0.00247299	0.000284172	0.00160849	0.000428786	0.000939769	0.000430339	0.00978164	0	0.00482804	0	0.000498163	0.00304701	0.00299271	0	0.00032508	0.000578913	0.00456274	0	0.000113766	0.191334	0.00379471	0.00271979	0.101271	0.566806	0.0106494	0.000140667	0.449765	0.00867029	0.111536	0.00258025	0.158979	0.0231272	0.000513584	0.155407	0.00230036	0.0816773	0.0447118	0.191393	0.00427206	0.0885312	0.0558268	0.0112113	0.105529
Fusobacterium nucleatum subsp. polymorphum	0.0467717	0.0731742	0.0801834	0.181662	0.00649295	0.0164605	0.145144	0.349478	0.0460979	0.000234494	0.0282708	0.216773	0.129339	0.000177536	0.0119196	0.000506549	0.00180608	0.0428287	0.157281	0.108817	0.000569206	0.000955601	0.00128353	0.000344743	0.0178758	0.0528907	0	0.00145855	0.000206932	0.00299308	0.000581734	0.0181833	0.0784757	0.00535117	0.162603	0.00337458	0.000148544	0.0313068	0.0098932	0.00190617	0.0508455	0.0821709	0.0205175
Fusobacterium periodonticum	0.0182786	0.000177607	0.0629725	0.00142929	0.0345152	0.0445401	0.0384349	0	0.0282407	0.000117247	0.240426	0.0220546	0.00201328	0.000177536	0.10771	0.000651277	0	0.0775135	5.69e-05	0.137357	0.00958163	0.00169068	0.109999	0.000393992	0.0148331	0.000773667	0	0.000324123	0.0522504	0.00144494	0.174271	0.0801911	0.0122233	0.143144	0.000985869	0.252968	0.0929144	0.00322154	0.0267566	0.0878958	0.0470632	0.0408333	0.0555937
Haemophilus parainfluenzae	0.00301059	0.00024865	0.0650635	0.0090045	0.000256301	0.000645508	0.0117577	0.00127352	0.00919312	0	0.00161903	0.0261172	0.0210578	0.00284057	0	7.24e-05	9.51e-05	0.00187485	0.000113766	0.000431127	0.00313063	0.00176419	0.164035	0.328638	0.00313778	0.00682234	0.238799	0.000972369	0.138024	0.029518	0.172526	0.019524	0.00261928	0.0283166	0.00368058	0.115236	0.0512478	0.138526	0.00775717	0.0683046	0.0419314	0.00773377	0.079971
Prevotella melaninogenica	0.000376324	0.00362319	0.00562973	0.0211534	0.0479282	0.0041958	0.0167968	0	0.00310847	0.0138352	0.0350582	0.0134939	0.00620307	0	0	0	0	5.86e-05	0.000511945	8.62e-05	0.00104354	0.000441047	0.000128353	0.00310268	0.00484929	0	0.0838851	0.00299814	0.10388	0.00959851	0.000249314	0.00100553	0.0134045	0.138907	0.0124877	0.00374953	0.00297088	0.0582356	0.00269814	0.360267	0.024399	0.00860295	0.0422557
Leptotrichia sp. oral taxon 225	0.00188162	0	0.00160849	0	0	0.00204411	0.000592827	0.0138855	0.0121032	0	0.0445856	0.00594893	0.290946	0	0.0462155	0	0.013308	0.000292946	0.116041	0.00125027	0.000853809	0.000220523	0.00205365	9.85e-05	0.0186365	0.0613307	0	0.000243092	0	0.000309629	0.00016621	0	0.177752	0.00163508	0.000525797	0.00137483	0.0184938	8.26e-05	0.0134907	0.000423594	0.0212099	0.0275352	0.015623
Neisseria flavescens|subflava	0.00897801	3.55e-05	0.110262	0.000786107	0.00247757	0	0.0125482	0.000246488	0.00509259	0	0.000311352	0.00544109	0.00217651	0.000769322	0.00184212	0.000289457	0	0	0.000113766	0.000388015	0.00142301	0.00169068	0.027981	0.00182221	0.0235809	0.000984667	0	0.000162061	0.198758	0.00371555	0.163218	0.0162561	0.00590622	0.00542549	0.000131449	0.145107	0.0414438	0.000247811	0.00472175	0.0217092	0.0204011	0.00758791	0.0348875
Capnocytophaga leadbetteri	0.00392452	0.000603865	0	0.205245	0.00222127	0	0.0349768	0.0575959	0.00462963	0	0.0646367	0.0277858	0.00642072	0.00159782	0.012028	0.00238802	0.000285171	0.00638622	0.000170648	0.245225	0.00265629	0.000294031	0.00038506	4.92e-05	0.0172102	0.019623	0	0.00129649	0.000103466	0.00258025	0.00673149	0	0.0308664	0	0.00584949	0.0193726	0.00943256	0.00470841	0.0122541	0	0.0202384	0.0338061	0.00688193
Campylobacter sp. oral taxon 044	0.226601	0	0.00571015	0	0.233746	0	0.00375457	0	0.13922	0	0.019117	0.000507835	0	0	0	0	0	0.161706	0.000284414	4.31e-05	0	0	0	0	0	0	0	0	0	0	0	0	0	0	6.57e-05	0	0	0.00140426	0	0	0.019804	0.0395345	7.73664e-05
Pseudomonas aeruginosa	0.000698887	0	0.00120637	0	0.00299017	0.000537924	0.000790436	0	0.0234788	0.343886	6.23e-05	0.013639	0.00484275	0.232039	0	0.134742	0.000380228	0.000234357	0	0	0	0	0	0	0	0	0	8.1e-05	0	0	0	0.000502765	0	0	0	0	7.43e-05	0	0	0	0.0190047	0.0379764	3.4635e-05
Porphyromonas sp. oral taxon 279	0.00284931	0.000106564	0	0.000571714	0.000598035	0.000107585	0.0101769	0.00447786	0.00886243	0	0.0343732	0.0903947	0.000816193	0	0.00016254	0.000651277	0	0.00199203	0.000284414	0.000215564	0.00407931	0.00176419	0.0994738	0	0.0109347	0.00879167	0	0.0060773	0.112778	0.0897925	0.0972326	0.000335177	0.0165888	0.000297287	0.000460072	0.0790526	0.0326055	0.00528663	0.00483418	0.0108017	0.0184457	0.00783201	0.030374
Capnocytophaga sputigena	0.00209666	0.0875249	0.000402123	0.0072179	0	0.000430339	0.0561209	0.010599	0.0010582	0	0.00330033	0.0133488	0.160953	0.137827	0.0008127	0	0	0	0.00841866	0	0.00502799	0.000147016	0.000128353	0	0.00285252	0.00541567	6.43e-05	0.000810307	0.000413864	0.000825679	0.0462894	0.00243003	0.0186431	0	0.0964837	0.0326834	0.00787285	0.000578226	0.00921866	0	0.0179999	0.0245055	0.0118346
Enterobacter cloacae	0	0	0	0	8.54e-05	0	0	0	0	0.00539336	0	0	0	0	0	0.707432	9.51e-05	0	0	0	0	7.35e-05	0.000128353	0	0	0	0	0	0	0	0	0.000418971	0	0	0	0	0	0	0	0	0.0178407	0.0356503	3.26749e-05
Leptotrichia trevisanii	0.00526853	0.397023	0	0.0994068	8.54e-05	0	0	4.11e-05	0	0	0.0594059	0.0214742	0	0.000118357	0.00146286	0	0	0.0167565	0.00426621	0	0	0	0	0	0	0.000703334	0	0	0	0	0	0	0.000205434	0	0	0	0	0	0.000337268	0	0.0151639	0.0302655	6.55808e-05
Bergeyella sp. oral taxon 931 nov 92.95%	0	0	0	0	0	0	0	0	0	0	0	0	0	0	0	0	0	0	0	0	0	0.000441047	0	0	0.0464011	0	0	0.53456	0.00827729	0	0.000747943	0	0.00066766	0	6.57e-05	0.000187477	0	0	0	0	0.0147837	0	0.0311236
Veillonella parvula group	0.00112897	0.000106564	0.0166479	0.00750375	0	0.000645508	0.0177848	0.00139676	0.0257937	0.000468988	0.00112087	0.00725479	0.00141474	0.000177536	0	0	0.0713878	0.00152332	0.00182025	0	0.000664074	7.35e-05	0.015274	0.0306821	0.00161643	0.00330567	0.0233335	0.00145855	0.0257631	0.0813293	0.0017452	0.00159209	0.0051872	0.0523226	0.0309563	0.00724909	0.00557041	0.072939	0.000899382	0.0396061	0.0139436	0.00780881	0.0211002
Leptotrichia sp. oral taxon 215	0.00112897	7.1e-05	0.0493003	0.00314443	8.54e-05	0.00150619	0.026776	0	0.000925926	0	0.00921602	0.0525972	0.0012515	0	0.00092106	0	0	0.00169909	0.00159272	0.0247036	0	0	0.102811	0.00103423	0.00114101	0.000351667	0	0.000243092	0.0116917	0	0.000415524	0.081029	0.000564943	0.045039	0.00565232	0.0276215	0.0214646	0.0141252	0.00157392	0.0508313	0.0135127	0.00874597	0.0192416
Fusobacterium nucleatum subsp. vincentii	0.00951562	0.00909349	0.011742	0.00121489	0.0844084	0	0.00158087	0.0270726	0.0154762	0.000234494	0.0121427	0.00652931	0.000816193	5.92e-05	0.00102942	0	0.0039924	0.0360323	0.26405	0	0.000189735	0	0	0.000196996	0.000380337	0.000562667	0.000771357	0.000486184	0	0.00887605	0	0.0014245	0.000616301	0.00772947	0.0222806	0.000374953	0	0.00330415	0.0010118	0.000105899	0.0133325	0.0242495	0.0025327
Porphyromonas sp. oral taxon 930	0.00236546	0	0.000965096	0.000714643	0.000170867	0	0.00128446	0	0	0	0.00392303	0.000580383	0.000598542	0	0	0	0	5.86e-05	0.000113766	0.00560466	0.000948677	0.280947	0	0	0.0396501	0	0	0	0.000206932	0.00010321	0	0	0	0	0.000262898	0	0.141043	0	0.00550871	0	0.0121262	0.000818975	0.0246169
Haemophilus influenzae	0.471104	0	0.000402123	0	0.000598035	0	9.88e-05	0	0	0	0.00149449	0	0	0	0	0	0	0	0.000170648	0	0	0	0	0	0	0	0	0	0	0	0	0	0	0	0	0	0	0	0	0	0.0118467	0.0236934	0
Campylobacter concisus	0	0.0165175	0.000482548	0	0.00444255	0.000753093	0.178144	0.00735355	0.0109127	0	0.00722336	0.00689205	0.000435303	0.000473429	0	0	0.0756654	0.0591165	0.00312855	0.00094848	0.000189735	0	0.00397895	0.00177296	0.000475421	0.001055	0.00977052	0.000486184	0.0123125	0	8.31e-05	0	0.00066766	0.00943887	0.00348341	0.000124984	0.00557041	0.0202379	0.000112423	0.0239331	0.0116546	0.0186245	0.00492123
Gemella haemolysans	0.00112897	3.55e-05	0.00321699	0.0030015	0	0.00333513	0.000395218	0.00127352	0.00244709	0	0.00224173	0.00224898	0.00108826	0.00313647	0	0.00238802	0.00171103	5.86e-05	0.00170648	0.0184091	0.037283	0.0654954	0	4.92e-05	0.0552439	0.000140667	0.000128559	0.0219593	0.000517331	0.0149654	8.31e-05	0.00100553	0.000564943	0.000891862	0.0180743	0.00343707	0.0095811	0.00107385	0.179651	0	0.0114492	0.00239113	0.0196244
Haemophilus sp. oral taxon 036	0.00607494	0	0.0180955	0.00757522	0.024434	0.00602474	0.000592827	0.000575138	0.00112434	0	0.0136372	0.00232153	0	0.274115	0.00021672	0	0.00256654	5.86e-05	0	0	0.000189735	0.0211702	0.000128353	0	0.00190168	7.03e-05	0	0.00664452	0.000103466	0.00196099	0	0.00385453	0.00174619	0	0.0389747	0	0	8.26e-05	0.000337268	0	0.0108644	0.0178706	0.00405131
Prevotella sp. oral taxon 306	0.000107521	0	0.0991636	0.00343029	0	0	0	0	0	0	0	0.00275682	0.000598542	0	0	0	0.248669	0	0	0	0	0	0	0	0	0	0	0	0	0.000619259	0	0	0.000308151	0.00564846	0	0	0	0.000413018	0	0	0.00904287	0.0177363	0.000367836
Leptotrichia sp. oral taxon 392	0.00241923	0.00550583	0	0	0	0	0.00158087	0.00135568	0.00892857	0	0.0179339	0.00116077	0	0	0.115458	0.0010131	0	0	0	0.000129338	0	0.00110262	0.00154024	0.000196996	0.0288105	0.0215923	0	8.1e-05	0.000103466	0.000928888	0.000332419	0	0.140722	0.000520253	0.000591522	0.0031871	0.000222816	0.00189988	0.00427206	0	0.00903973	0.00777424	0.0108476
Leptotrichia sp. oral taxon 417	0	0	0.013833	0	0	0	0.0347792	0	0.00026455	0	0.00647612	0.00326465	0.00935902	0	0.00097524	0	0	0.0846028	0.000227531	8.62e-05	0	0	0.00166859	0	0.00171152	7.03e-05	6.43e-05	0.000324123	0.000413864	0.00165136	0	0.176303	0.0033383	0.000743218	0.00124877	0.000124984	0	0.0110689	0.00517145	0.000635391	0.00896016	0.00769341	0.0107652
Haemophilus parahaemolyticus	0.00263427	0.000213129	0.00265401	0	0	0	0	0.0006573	6.61e-05	0	0.000124541	0.00152351	0.000326477	0	0	0	0	0	0	0	0.067356	0.000220523	0	0	0.073405	0	0.00392106	0	0	0.00712148	0.00191141	0	0.000102717	7.43e-05	0.00387775	0.000374953	0.152629	0	0.0304666	0	0.00874151	0.000409967	0.0144266
Campylobacter showae	0.00096769	0.00223785	0	0.0123633	0.0749252	0.000107585	0.0066199	0.00410813	0.00972222	0	0.00934056	0.01509	0.00185004	0	0.0503874	0.000361821	0	0.00386689	0.0216724	0.0685924	0.000189735	0	0	0	0.00713131	0.028696	0	0.000162061	0	0.00154815	0	0.000167588	0.0200298	0	0.00190601	0.00056243	0.000519905	0.000660829	0.000562114	0	0.00860873	0.0141107	0.00326033
Streptococcus multispecies spp14 2	0	0	0.000643397	0	0	0.284346	0.00316174	0	0.000198413	0.00328292	0	0.000580383	0	0	0	0	0	0	0	0.000388015	0	7.35e-05	0.000641766	0.00157597	9.51e-05	0	0	0.000243092	0.00124159	0	0.00016621	0.00100553	0	0.00423634	0.000131449	0.000749906	0.00118835	0.0157773	0	0.00222387	0.00804878	0.0146301	0.00154474
Fusobacterium nucleatum subsp. animalis	0.00145154	0.000106564	0.0152807	0	0	0.0473373	0.00928762	0.000821625	0.000793651	0	0.000498163	0.0271329	0.0132767	0	0.00016254	0	0.0202471	0.00996016	0.00153584	0	0.000189735	0	0.000513413	0.000147747	0	0	6.43e-05	0.000162061	0	0.0120756	0	0.144042	0.000102717	0.00252694	0.00703253	0	0	0.00264332	0.000899382	0.000847188	0.00797849	0.00739462	0.00900302
Streptococcus sp. oral taxon 423	0.000215042	0	0	0.0386622	0	0.0252824	0.00187729	0.000287569	0.046627	0.0954391	0.00896693	0.00993906	0	0	0	0.0199001	0.00104563	0.000351535	0.000113766	0.00823453	0.000569206	0.000588062	0.00115518	4.92e-05	0.000190168	0.001055	6.43e-05	0.000729276	0.00165546	0.0358138	8.31e-05	0.000670354	0.000719018	0.000743218	0.00867565	0.00212473	0.000445633	0.00214769	0.000449691	0.000105899	0.00787442	0.0128471	0.0030245
Granulicatella adiacens	0.000591366	7.1e-05	0.00345826	0.0137926	0	0.0403443	0.0175872	0.00168433	0.0473545	0.000117247	0.000435893	0.00428032	0.000816193	0	0.00048762	0.0126637	0.0143536	0.000117178	0.00119454	0.0228066	0.000284603	0.000294031	0.0161725	0.00246245	0.00218694	0.000351667	0.00514238	0.00137752	0.00755303	0.0112499	0.0112191	0.00201106	0.00154075	0.021702	0.00243181	0.0113736	0.00512478	0.00859078	0.000899382	0.0075188	0.00754109	0.00910783	0.00627381
Granulicatella elegans	0.000483845	0	0.00144764	0.00235832	8.54e-05	0.0600323	0.000691631	0.000534056	0.000396825	0	0.0010586	0.00210389	0.000544129	0	0	0.000578913	0	0	0.000113766	0.000215564	0.167157	0.00154366	0	0	0.0183512	0	0	0.0247144	0.000206932	0.000516049	0	0	0	0	0.00157739	0.000687414	0.0031937	0	0.00179876	0	0.00725978	0.00353224	0.00276787
Streptococcus dentisani	0.000215042	0	0	0	0	0.000968263	9.88e-05	0.000492975	0	0	0.000124541	0.00224898	0	0	0	0	0	0	0	0.000344902	0.00464851	0.0313878	0.002182	0.000393992	0.023676	0.00710367	0	0.00948059	0.0351785	0.0125916	0.0016621	0.00402212	0.00688203	0.00958751	6.57e-05	0.0354331	0.0272579	0.0674046	0.00472175	0.00137668	0.00723874	0.000224675	0.0147583
Prevotella histicola	0.000161282	0	0.0977964	0.000857572	0	0	0.00375457	0.00345083	0.000330688	0	0	0.00311956	0	0	0	0	0	0	0.000682594	0.0020263	0	0	0.00102683	0.000246245	0	0	0	0.000243092	0.00227626	0.000412839	0	0.000586559	0	0.139948	0.000657246	0.000312461	0	0.00239551	0.000224845	0.0185322	0.00697605	0.00560899	0.00878222
Fusobacterium necrophorum	0	0.276179	0	0	0	0	0	0	0	0	0	0	0	0	0	0	0	0	0	0	0	0	0	0	0	0	0	0	0	0	0	0	0	0	0	0	0	0	0	0	0.00690448	0.013809	0
Prevotella nanceiensis	0.000537606	0.00554135	0.00973138	0.0498106	0.0234088	0.0610005	0.0170932	0.00135568	0.000595238	0	0.0094651	0.0328642	0	0.000295893	0.00102942	0	0	0	0.000113766	0.0122009	0.000948677	0	0.002182	9.85e-05	0.00114101	0	0	0.000162061	0.0067253	0.000619259	0.0034073	0.000418971	0	0	0.000131449	0.00137483	0.00438206	0.00933421	0.000562114	0.000847188	0.00643446	0.0112522	0.00165191
Alloprevotella sp. oral taxon 473	0.00639751	0	8.04e-05	0.0520975	0.00170867	0.010113	0	0.0052584	0.00138889	0.000117247	0.00305125	0.0208212	0.0165415	5.92e-05	0.00260064	0	0	0.000292946	0.0167804	0.00129338	0.000189735	0.00139665	0.000898473	0	0.00580013	0.001055	0	0.0617454	0.00155199	0.00464444	8.31e-05	0	0	0	0.0116333	0.000374953	0.000519905	0.000165207	0.000112423	0	0.00571932	0.00693011	0.00473584
Leptotrichia hongkongensis	0	0	0.00812289	0.00693204	0	0.000322754	0.0484142	0	0	0	0	0	0.00152356	0	0	0	0.0144487	0.00070307	5.69e-05	0	0.000853809	0	0.00115518	0.00108348	0.000665589	0	0.000899916	0.000324123	0.000827729	0.0010321	0	0.0987096	0.00934723	0.00319584	0	0.000937383	0	0.0219726	0.000786959	0	0.00555789	0.0040262	0.00741777
Leptotrichia sp. oral taxon 219	0	0.000142086	0	0	0	0.00258203	0	0.174924	0.00231482	0	0	0.000145096	0.0226358	0	0.00070434	0	0.00123574	0	0.0112628	0	0.000379471	0	0	0	0	0.000140667	0	0	0	0.00010321	0	0	0.00107853	0	0	6.25e-05	0	0	0	0	0.00544278	0.0107973	7.28897e-05
Streptococcus infantis	5.38e-05	0	0.0258163	0.000214393	0	0	0.00187729	0	0.00026455	0	0	0.000145096	0	0	0	7.24e-05	0	0	0	0.00155206	9.49e-05	0	0.126428	0.00852007	0.000760673	0	0	0.000243092	0.013761	0.000516049	0.00731322	0.00226244	0.000719018	7.43e-05	6.57e-05	0.0138108	0.0063874	0	0.000112423	0.00624801	0.00543282	0.00149979	0.00985379
Capnocytophaga gingivalis nov 90.68%	0.0344605	0	0	0.0591724	0	0	0.00237131	0.00345083	0.0202381	0	0.00354941	0	0	0	0.0410684	0	0	0	0	0	0	0	0	0	0	0	0	0	0	0.00113531	0.0422172	0	5.14e-05	0	0	0.000249969	0.000148544	0	0.00112423	0	0.00523094	0.00821555	0.00236456
Fusobacterium sp. oral taxon 370	0	0	0	0	0.000598035	0	0.00138326	0	0	0	0	0	0	0	0.17874	0	0	0.0275369	0	0	0	0	0	0	0	0	0	0	0	0	0	0	0	0	0	6.25e-05	0	0	0	0	0.00520801	0.0104129	3.28947e-06
Streptococcus parasanguinis II	0	0	0.0678784	0.00114343	0	0.0178591	0.000296413	0.000739463	0.00205026	0	0.000249082	0.00340975	0	0	0	0	0.0013308	0	0	0.000129338	0	0	0.000513413	0.0179759	9.51e-05	0	0.00758501	0.00194474	0.00444904	0.00340592	8.31e-05	0.00259762	5.14e-05	0.0251208	0	0.000749906	0.000148544	0.0315546	0	0.0117547	0.00507789	0.0047543	0.00568578
Neisseria flava	0.00236546	0.000177607	0.00144764	0.0621739	0	0.000322754	0.0254916	0.00665516	0.000198413	0	0.000498163	0.0748694	0.00821635	0.00124275	0	0	0	5.86e-05	0	0	0	0	0	0.000344743	0.000380337	7.03e-05	0	0	0.000103466	0	0.00016621	0	0.00128396	0	0.000197174	6.25e-05	0	0.00148687	0.0140528	0	0.00504666	0.00918589	0.000955179
Leptotrichia hofstadii	0.000376324	0	0	0	0	0	0	0	0	0	0.000249082	0.000145096	0	0	0	0	0	0	0	0	0	7.35e-05	0	0	0.00114101	0.126881	0	8.1e-05	0	0.00020642	0	0.0361153	0.0221868	0.000966184	0.000131449	0.0016248	0	0.000991244	0	0.000529493	0.00479248	3.85251e-05	0.0100489
Streptococcus sp. oral taxon 064	0	0	8.04e-05	0.000142929	0	0.0132329	0.00800316	4.11e-05	0	0.00504162	0	0.000798027	0	5.92e-05	0	0	0.000190114	0	0	0.00206941	0.000284603	0.00316083	0.00628931	0.000147747	0.00114101	0.00211	0.00250691	0.00769792	0.00372478	0.111673	0.000498629	8.38e-05	0.0012326	0.00208101	6.57e-05	0.00987377	0.000445633	0.00693871	0.000449691	0	0.00475161	0.00148294	0.00842743
Haemophilus haemolyticus	0.000913929	0.000284172	0.0266206	0.000571714	8.54e-05	0	0	0.000739463	0	0	0.00498163	7.25e-05	0	0.00952776	0.00016254	0	0.000285171	0.000175768	5.69e-05	0	0.00863296	0.000220523	0	0	0.0312827	0	6.43e-05	0.0120736	0	0.000309629	0	0	0.000256792	0	0.00663819	6.25e-05	0	0.000165207	0.0842046	0	0.00470971	0.00222387	0.0071199
Aggregatibacter segnis	0.00209666	0.00131429	0.0100531	0.000214393	0.0161469	0	0.000296413	0.00665516	0.00780423	0	0.00161903	0.0104469	0.00691044	0.0094094	0.0005418	0	0.0507605	0	0.0295222	0	0.000189735	0.00117613	0	0	0.00513454	0.001477	0	0.000324123	0.000103466	0.000722469	0.00016621	0	0.010323	0	0	0.00143732	0	0	0	0.000105899	0.00437378	0.00768957	0.00110369
Mycoplasma buccale	0	0	0	0	0	0	0	0	0	0	0	0	0	0.174222	0	0	0	0	0	0	0	0	0	0	0	0	0	0	0	0	0	0	0	0	0	0	0	0	0	0	0.00435555	0.00871109	0
Fusobacterium sp. HOT 204	0	0	0.000562972	0.000142929	8.54e-05	0.010113	0	0.10599	0.00165344	0	0.00572887	0.00101567	0	0	0	0	0	0.00679634	0	0	0	0	0.000898473	9.85e-05	0.00199677	0.003798	0	8.1e-05	0.000103466	0.000928888	0	0.0117312	0.00662524	7.43e-05	0.00867565	0.000124984	0	0	0.00393479	0.00074129	0.00429752	0.00660441	0.0020954
multigenus multispecies spp6 4	0	0	0	0	0	0	0	0	0	0.168953	0	0	0	0	0	0	0	0	0	0	0	0	0	0	0	0	0	0	0	0	0	0	0	0	0	0	0	0	0	0	0.00422382	0.00844765	0
Treponema medium	0	0	0	0	0.0332337	0	0	0	0.0010582	0	0.00410984	0.00340975	0	0	0	0	0	0.125088	0	0	0	0	0	0	0	0	0	0	0	0	8.31e-05	0	5.14e-05	0	0.000262898	0	0	0	0	0	0.00418242	0.00834497	2.09157e-05
Leptotrichia sp. oral taxon 212	0.000430084	0	0.00329741	0	0	0	0	0	0.00205026	0	0.000809515	0.00986651	0.000816193	0	0.00476784	0	0	0	0	0	0	0.000220523	0.00038506	0	0.0133118	0.0964271	0	0	0.00155199	0.000722469	0.000249314	0.0209485	0.0021057	0	0.000722971	0.000249969	0	0.00090864	0.00370995	0.000635391	0.00410468	0.00110189	0.00748155
Parvimonas micra	0.00397828	0.0169793	0.000241274	0.00257272	0.0189663	0.0188273	0.000691631	0.015693	0.00152116	0	0.000560433	0.00906848	0.0067472	0.000355072	0.00032508	0	0	0.0038083	0.0366894	0	0	0	0.000256706	0	9.51e-05	0	6.43e-05	0.000405154	0	0	0	0.000586559	0.000102717	0.000594575	0.0142622	0	0	0	0.000112423	0.000105899	0.00384026	0.00685125	0.00087293
Catonella morbi	0.000537606	0.0251492	8.04e-05	0	0.00751816	0.0013986	0.00108685	0	0.00297619	0	0.0265272	0.0187174	0.00163239	0	0.0152788	0	0	0.0172252	0.0162116	0.00176762	0	7.35e-05	0.000128353	0	0	0.000492334	0	0	0.00269012	0.00010321	0	0	0.000154075	0.000520253	0.00460072	0.000124984	0.00118835	0.00140426	0.000449691	0	0.00370092	0.00680536	0.000627887
Streptococcus cristatus	0.000645127	0	0.00369953	0	0	0	0.00365577	0	0	0	0	0.00188624	0.00244858	0	0	0.000217092	0	0	0	0.000172451	0	7.35e-05	0.00038506	4.92e-05	0.111629	0.007174	0.000128559	0.00324123	0.000517331	0.00020642	8.31e-05	0.000335177	0.00313286	0.000148644	0	0.000812398	0	0.000578226	0.00505902	0.000105899	0.00365961	0.00063624	0.00703471
Leptotrichia buccalis	0.0099457	0	8.04e-05	0	0	0	0	0	0.00205026	0.000117247	0.00180584	0	0	0	0.00043344	0	0	0	0	0	0	0.000294031	0	0	0.0188267	0.0623154	0	0.000324123	0	0.00010321	0	0	0.0419598	0.000222965	0	0.000812398	0	0.000743433	0.00449691	0.00074129	0.00363183	0.000721645	0.00688633
Capnocytophaga gingivalis	0.000537606	0.000106564	0	0	0	0	0.0219346	0.00221839	0	0	0.000684974	0.000652931	0.0251932	0	0	0.000144728	0	0	0.00130831	0	0.000474338	0	0.0019253	4.92e-05	0.000760673	0.0163877	0	0	0.000827729	0.000309629	0.0325771	0.00268141	0.000873093	0.000222965	0.0199803	0.0096238	0.000371361	0.00090864	0.000786959	0.000317696	0.00354648	0.00263906	0.00466334
Porphyromonas endodontalis	0	0	0	0	0.0993592	0.000107585	0.00088924	0	0.00899471	0	0.000498163	0	0	0	0.002709	0	9.51e-05	0.0134169	0	0	0	0	0	0	0.000665589	0	6.43e-05	0.00170164	0	0.000722469	0	0	0	0.000371609	0.00768978	6.25e-05	0	0.000826037	0.00326026	0	0.00353585	0.0063035	0.000808641
Neisseria mucosa	0	0	0.0068361	0	0	0	0.0022725	0	0.000132275	0	0	0	0	0.00106521	0	0	0	0	5.69e-05	0	0.00369984	0.00551308	0	0	0.00275744	0.001477	0.000128559	0.000405154	0.000413864	0.112808	0	0.000670354	0.000821735	0	6.57e-05	0	0	0	0.000337268	0.000635391	0.00350242	0.000518149	0.00663336
Prevotella salivae	0	0.00024865	0.00989223	0.000929036	0	0	0.000691631	0	0.100926	0.000351741	0	0.00130586	0.00261182	0	0	0	0.00114068	0.000175768	0.000511945	0	0	0	0.000128353	4.92e-05	0.000380337	0	0.00257119	0.000243092	0.000310398	0.00020642	0	0	0.000102717	0.00304719	6.57e-05	6.25e-05	0	0.0115645	0	0.00190617	0.00348558	0.00593926	0.0010862
Streptococcus sp. oral taxon 431	0.000376324	7.1e-05	0.000482548	0.000571714	0.00119607	0.00268962	0.000790436	4.11e-05	0.00112434	0	0.0050439	0.00486071	0.000217652	0.000118357	0	0	0.00627376	0.0120108	0	0.000344902	0.00142301	0.000367539	0.0413297	0.00167446	0.000475421	0.000140667	0.00803497	0.000243092	0.0177962	0.00020642	0.00324109	0.000251383	0.000102717	0.0120401	0	0.00518685	0.00326797	0.00173468	0.000224845	0.00158848	0.00338857	0.00181066	0.00515298
Capnocytophaga sp. oral taxon 336	0.000107521	0	0	0	0	0	0.00177848	0	0.000198413	0	0.000124541	0	0	0	0	0	0	0	5.69e-05	0	0	0	0	0	0	0.131453	0	0	0	0	0	0	0.000513584	0	0	0	0	0.000165207	0	0	0.00335994	0.000113293	0.00695431
Oribacterium sinus	0	0.000994601	0.000160849	0.00257272	8.54e-05	0	0.000691631	0	0.0517196	0	0	0.00420778	0	0	0	0	0.00960076	0	0.00147895	0.00603578	0	0.000147016	0.00154024	0.000246245	9.51e-05	0	0	0	0.00558717	0	0.000249314	0.000586559	0	0.00319584	0.000131449	0.000499938	0.00363934	0.0237073	0.000112423	0.0131314	0.00326043	0.0038774	0.00278259
Campylobacter gracilis	0	0	0	0	0	0	0.0317162	0	0.00132275	0	0	0.00152351	0	0	0	0	0	0	0	0	0	0	0.000128353	0	0.000190168	0.00618934	0.000128559	0	0	0.00134173	0	0	0.00256792	0	0.0801183	6.25e-05	0	0.000165207	0.000112423	0	0.00313917	0.00172812	0.00478971
Streptococcus sp. oral taxon 061	0	0	8.04e-05	0	0	0	0	0	0	0	0	0	0	0	0	0	0	0	0	0	0	7.35e-05	0.0337569	4.92e-05	0	0	6.43e-05	0.000243092	0.0171754	0.012282	0.000581734	0.000251383	0	0.00891862	0	0.00831146	0.000222816	0	0.000337268	0.034417	0.00291913	4.02e-06	0.0061413
Haemophilus sp. oral taxon 908	0	0	0.000562972	0.00242979	0.000256301	0.00225928	0	0	0.00026455	0	0	0	0	0	5.42e-05	0	0	0	0.00557452	0	9.49e-05	0.0949721	0	0	9.51e-05	0	0	0	0	0.00010321	0	0	0	0	0	0	0	0	0.00562114	0	0.0028072	0.00057008	0.00530482
Kingella kingae	0.00166658	0	0	0	0	0	0	0	0	0	0	0	0	0	0	0	0	0	0.109158	0	0	0	0	0	0	0	0	0	0	0	0	0	0	0	0	0	0	0	0	0	0.00277062	0.00554124	0
Capnocytophaga granulosa	0.00112897	0	0	0.000142929	0	0	0.000988045	0.00870923	0.000992063	0	0	0	0.035586	0	0	0	0	0	0	0	0	0.000147016	0	0	0.00389845	0.039246	0	0	0.000103466	0	0.00016621	0	0.000924452	0.000297287	0.000197174	0.00149981	0	0.00528663	0.00786959	0	0.00267958	0.00237736	0.00313874
Haemophilus sputorum	0	0	0	0	0	0	0	0	0	0	0.016813	0.00326465	0.0255741	0	0	0	0	0	0	0	0	0.000588062	0	0	0.000950841	7.03e-05	0	0	0.0211071	0.00134173	0.00241004	0.0029328	0.000410867	7.43e-05	0	6.25e-05	0.0280749	0	0.000562114	0.000635391	0.00262182	0.00228259	0.00311689
Leptotrichia sp. oral taxon 215 nov 96.98%	0	0	0.00265401	0	0	0	0	0	0.00026455	0	0.0120182	0	0.00326477	0	0	0	0	0	0	0.0377668	0	0	0	0	0	0	0	0	0	0	0	0	0	0	0	0	0.0463458	0	0	0	0.00255785	0.00279841	0.00243925
Atopobium parvulum	0.000161282	0.000461779	0.000241274	0.00114343	0	0	0.000988045	8.22e-05	0.0289683	0.000117247	0	0.00442542	0.000272064	0	0	0	0.00693916	0.000878838	0.000682594	0	9.49e-05	7.35e-05	0.000641766	0.000246245	0	0	0.0190268	8.1e-05	0.00175892	0.00010321	0	0	0	0.00602007	0.000460072	0.000249969	0	0.0122253	0	0.00783649	0.0023545	0.00226808	0.00256439
Leptotrichia shahii	0	0	0.00249316	0	0	0	0.00414979	0	0.00198413	0	0	0	0	0	0.00140868	0	0.00218631	0	0	0.00280233	0	0	0	0	0.025958	0	0	0.00145855	0.000206932	0.000309629	0	0	0.0470443	0	0.000262898	0.00112486	0	0.000165207	0.00157392	0	0.00232822	0.00075122	0.00411075
Bergeyella sp. oral taxon 322	0	0.000106564	0.00273444	0.00164368	0	0	0.00108685	0.000164325	0.000595238	0	0.0010586	0.00116077	0.0016868	0.000177536	0.00899388	0	0	0	0	0.0471222	0.00208709	0.000367539	0.00282377	0	0.00171152	0.000633	6.43e-05	0.000486184	0.000827729	0.00381876	0.00473697	0	0.000821735	0.000222965	0.000131449	0.00343707	0.00326797	8.26e-05	0.000449691	0	0.00231253	0.00332654	0.00125701
Eikenella corrodens	0.000537606	0	0.00128679	0.00150075	8.54e-05	0.0121571	0.00316174	0.00673733	0.00634921	0	0	0.0066744	0.00391773	0.0194698	0.00119196	0	0.00104563	0	0.00159272	0	0	0.000220523	0.00744449	0	0.00123609	0.000422	0	0	0	0.000309629	0	0	0.00066766	0	0.011699	0.00056243	0	8.26e-05	0.000674536	0	0.00222568	0.0032854	0.00122731
Proteus mirabilis	0	0	0	0	0	0	0	0	0	0	0	0	0	0.0879986	0	7.24e-05	0	0	0	0	0	0	0	0	0	0	0	0	0	0	0	0	0	0	0	0	0	0	0	0	0.00220177	0.00440355	0
Veillonella atypica	5.38e-05	0	0.026138	0.000571714	0	0	0.000296413	4.11e-05	0	0	0.000124541	0.00210389	0.000217652	0	0	0	0.000665399	0.000234357	0	0	0	0	0.000128353	0.000590987	0	0	0.0140773	0.000405154	0.00434558	0.00010321	0	0	0.00277335	0.00706057	0.000131449	6.25e-05	0	0.0205683	0.000112423	0.00338875	0.00210487	0.00152234	0.00282884
Neisseria elongata	0.000161282	0.000142086	0	0	0.00495515	0	0.000592827	0	0.00846561	0	0.00155676	0.0033372	0.00446186	0	0.027686	0	0	0	0	0	0	7.35e-05	0	0	0.000665589	0.0260234	6.43e-05	0	0	0	0	0	0.00133532	0	0.000460072	0	0	0.000247811	0.00213603	0	0.00205912	0.00256794	0.00163189
Moraxella osloensis nov 89.07%	0.030751	0	0	0	0	0	0	0	0.0324735	0	0.016813	0.000725479	0	0	0	0	0	0.000937427	0	0	0	0	0	0	0	0	0	0	0	0	0	0	0	0	0	0	0	0	0	0	0.00204251	0.00408502	0
Solobacterium moorei	0.000806408	0.00259307	0.000321699	0	0	0	0.000197609	0.00304001	0.00112434	0	0.000934056	0.00660186	0.0180107	5.92e-05	0.00010836	7.24e-05	0	0.00240216	0.0361775	0	0	0	0	0	9.51e-05	0	0.000321399	0.000243092	0.000827729	0.00010321	8.31e-05	0.000251383	0	0.000891862	0	0.000312461	0.000445633	0.00107385	0.000112423	0.00423594	0.00203616	0.00362247	0.000473536
Escherichia coli	0	0	0	0	0	0	0	0.061663	0	0	0	0.0069646	0	0	0	0.0118677	0	0	0	0	0	0	0	0	0	0	0	0	0	0	0	0	0	0	0	0	0	0	0	0	0.00201238	0.00402476	0
Porphyromonas sp. oral taxon 285	0.0020429	0.00809889	0	0	0.0254592	0	0.000494022	0	0.00026455	0	0.0216701	0.000145096	0	0	0	0	0	0	0.0220705	0	0	7.35e-05	0	0	0	0	0	0	0	0	0	0	0	0	0	0	7.43e-05	0	0	0	0.00200983	0.00401226	7.77895e-06
Gemella morbillorum	0.00349444	0.00166951	0.000402123	0.00328736	0.00170867	0.00398063	0.0021737	0.00234163	0.00224868	0	0.00846877	0.00674695	0	0.0077524	0.00086688	0	0	0.000761659	0.0293515	0	0	0	0	0	0.000855757	0	0	0	0	0.000309629	0	8.38e-05	0.00231113	0	0.00105159	0	7.43e-05	0	0.000449691	0	0.00200977	0.00376275	0.000270311
Moraxella sp. Oral Taxon B07	0.000322563	0	0	0	0	0	0	0	0.0220899	0	0	0	0	0	0.0438316	0	0	0	0	0	0	0	0	0	0.000380337	0	0	0	0	0.00020642	0.00648217	0.000167588	0.00066766	0	0	0.000187477	0	0	0.00517145	0	0.00198768	0.00331221	0.000698058
Prevotella sp. oral taxon 313	0	0	0.000884671	0.000428786	0.00145237	0	0.00414979	0	0	0	0	0	0.00103385	0	0	0	0	0	0	0	0	0	0.000128353	9.85e-05	0	0	0	0	0.00155199	0.00010321	0	0	0	0.0123374	0.000262898	0.000124984	0	0.048984	0.000112423	0.00624801	0.00194753	0.000397473	0.00368167
Leptotrichia sp. oral taxon 215 nov 97.41%	0	0	0	0	0	0.00107585	0	0	0.000727513	0	0.000124541	0	0.00217651	0	0.0021672	0	0	0	0	0	0	0	0.015274	0.000147747	0	0	0	0.000891338	0	0	0.0222721	0.00184347	0.00261928	0	0.00552087	0.00174978	0.0101753	0.00710391	0.000786959	0.00148258	0.00190347	0.000313581	0.00367723
Streptococcus australis	0	0	0.000321699	0	0	0	9.88e-05	0	0	0	0	7.25e-05	0	0	5.42e-05	7.24e-05	0	0	0	8.62e-05	0.000189735	0.000147016	0.0293929	0.010096	0.00114101	0	0.000128559	0	0.00434558	0.000309629	0.00573423	0.000670354	0.000359509	0.000371609	0	0.0130609	0.00304516	0.000330415	0.000337268	0.00275336	0.00182798	3.529e-05	0.00380124
Treponema amylovorum	0	0	0	0	0	0	0	0	6.61e-05	0	0.0406003	0.000870575	0	0	0.00195048	0	0	0.029236	0	0	0	0	0	0	0	0	0	0	0	0	0	0	0	0	0.000197174	0	0	0	0	0	0.00182302	0.00363617	1.03776e-05
Lautropia mirabilis	0.000268803	0	0	0	0	0.0013986	0	0.000369731	0.00026455	0	0	0.000217644	0.010012	0	0.00086688	0	0	0	0.00039818	0	0.000474338	0.00727727	0	0	0.00218694	0.00675201	0.00218551	8.1e-05	0.000206932	0.00175457	8.31e-05	0.00469247	0.0225464	7.43e-05	0.00276043	0.000187477	0	0.00107385	0.00629567	0.000211797	0.00181601	0.000689818	0.00307209
Actinomyces odontolyticus	0.000322563	0	0.000321699	0.00371614	0	0.00129102	0.00237131	0.00032865	0.00152116	0	0	0.00210389	0.00261182	0	0.00059598	0	0.00380228	0.000175768	0	0.00047424	0	0.000147016	0.013092	0.0049249	0.000950841	0.000633	0.00642797	0	0.00186239	0.000516049	0.000914153	0.000418971	0.000154075	0.00966184	0.00322051	6.25e-05	0.00148544	0.00140426	0.000112423	0.00434184	0.00174917	0.000981826	0.00264896
Fusobacterium nucleatum subsp. nucleatum	0.000376324	0	0	0	0.000854336	0	0	0	0.000727513	0	0.000124541	0	0.0203504	5.92e-05	0	0	0.034981	0.000117178	0	0	0	7.35e-05	0	0	0	0	0	0	0	0.0020642	0	0	0.0018489	0	0.00696681	0	0	8.26e-05	0.000562114	0	0.00172972	0.00287952	0.000610428
Prevotella intermedia	0	0.00255755	0	0	0.000598035	0	0	0	0.00112434	0	0.00174357	0	0.0128959	0.000177536	0.0118654	0	9.51e-05	0.00421842	0	0	0	0	0	0	0.000855757	0	0	0.000405154	0	0.000928888	8.31e-05	0	5.14e-05	0.0010405	0.0278015	0.000374953	0	0.000578226	0.000786959	0	0.00170456	0.00176379	0.00173192
Leptotrichia sp. oral taxon 463	0.000430084	0	0	0	0	0	0	0	0	0	0.00516844	7.25e-05	0	0	0	0	0	0	0	0	0	0	0	0	0.0510602	0.000492334	0	0	0	0.00010321	0	0	0.000873093	0	0	0.000249969	0	0	0.00753232	0	0.00164955	0.000283551	0.00317427
Streptococcus salivarius	0	3.55e-05	0.00201062	0	0	0.0194728	0.00326055	0	0.00026455	0	0	0.00188624	0	0.001657	0	0	0	0	0	0	0	0	0.000128353	0.00305344	0	0	0.028026	0.000405154	0.00227626	0	0	0.000251383	0	0.000594575	0.000197174	0	7.43e-05	0.000660829	0	0.00074129	0.0016249	0.00142936	0.00191625
Tannerella sp. oral taxon 286	0.000215042	0	0	0.000285857	0	0	0.00296413	0.000492975	0.0015873	0	0.000622704	0.000145096	0	0	0	0.000144728	0	0.000351535	0	0	0	7.35e-05	0.000128353	0	0.00560996	0.004009	0	0	0	0.00020642	0	0.00561421	0.0372862	7.43e-05	0.00170884	0.000374953	7.43e-05	0.000495622	0.00179876	0	0.0016066	0.000340469	0.00302392
Aggregatibacter sp. oral taxon 512	0.0106446	0	0.000241274	0.00293004	0	0.0091447	0	0.0083395	0.0105159	0	0	7.25e-05	0.000326477	0.00751568	0.00363006	0.000217092	0	0	0.0023322	0	0	0.000220523	0	0	0	0	0	0	0	0.00165136	0	0	0.000256792	0	0.000788695	0.000249969	0	0	0.000337268	0	0.00148536	0.0027955	0.000184453
Porphyromonas gingivalis	0.000268803	0.00134982	8.04e-05	0	8.54e-05	0	0	0	0.00608466	0	0.000186811	0	0	0	0	0	0	0.0298219	0	0	0.000189735	0	0	0	9.51e-05	0	0.000257119	0.00202577	0	0.000309629	0	0	0	0.00304719	0.00814985	0.000249969	0	0.000991244	0.00202361	0	0.00138042	0.00189389	0.000902604
Propionibacterium propionicum	0	0.000142086	0	0	0	0	0	0.00698381	0.000462963	0	0.000124541	0.00507835	0.0238873	0	0.00097524	0	0.000285171	0.00111319	0.000227531	0	0	7.35e-05	0	0	0.000380337	0.00808834	0	0	0.000103466	0.00010321	0	0	0.00482769	0	0	0	0	8.26e-05	0.000224845	0	0.0013291	0.00196401	0.000730736
Streptococcus sanguinis	0.000161282	0	0	0	0	0.00129102	0.00128446	0.000575138	6.61e-05	0	0	0.00718224	0.00174121	0	5.42e-05	0	0.000380228	5.86e-05	5.69e-05	8.62e-05	9.49e-05	0.000514555	0.000256706	0.000196996	0.000190168	0.00288367	0.00134987	0.000162061	0.000103466	0.0241511	0	0.00444109	0.00164347	7.43e-05	0.00210319	6.25e-05	0	0.000743433	0.000786959	0.000105899	0.00132005	0.000646879	0.00209313
Salmonella Schwarzengrund ss enterica	0	0	0	0	0	0	0	0	0	0.0526439	0	0	0	0	0	0	0	0	0	0	0	0	0	0	0	0	0	0	0	0	0	0	0	0	0	0	0	0	0	0	0.0013161	0.0026322	0
Prevotella oris	0.00978442	0.00309037	8.04e-05	0	0.00794532	0.000215169	0.00454501	0.00032865	0.000661376	0.00351741	0	0.00145096	0.000217652	5.92e-05	0.00157122	0	9.51e-05	0.00234357	0.00273038	0	0.000474338	0	0.000256706	9.85e-05	0	0	0	0	0	0.00959851	0	0.000167588	0.000359509	0	0.00170884	0	0	0.000413018	0.000224845	0.000211797	0.00130375	0.00193181	0.00068628
Fusobacteria [G-1] sp. Oral Taxon A71	0	0	0	0	0.0343443	0	0	0	0.00026455	0	0	0	0	0.000650965	0	0	0	0.00240216	0	0	0	0	0	0	0	0	0.000192839	0.00267401	0	0.000309629	0	0	0	0.00401338	0	0.000374953	0	0.00611267	0	0	0.00128349	0.0018831	0.000719868
Propionibacterium acnes	5.38e-05	3.55e-05	0.000321699	0.00107197	0.000256301	0	0.00197609	8.22e-05	0	0	0	0.000290192	0.000489716	0.000295893	0.00032508	0	0.0013308	0.000234357	0	8.62e-05	0.000284603	0.000735078	0	0	0	0	0	0.00121546	0	0.000309629	8.31e-05	0.0367019	0	0	0.000525797	0	0.00274807	0	0.00112423	0	0.00126444	0.00034249	0.00228649
SR1 [G-1] sp. oral taxon 345	0.000215042	3.55e-05	0.000241274	0	0.0311833	0	0.00207489	0	0.00343915	0	0.00348714	0.000362739	0	0	0.00211302	0	0	0	0	0	0	0	0	0	0.00304269	0.000773667	0	0.000162061	0	0	0	0	0.00220841	0	0	0.000249969	0.000222816	8.26e-05	0.000449691	0	0.0012586	0.0021576	0.000378522
Streptococcus sp. oral taxon 074	0	0	0	0	0	0	0	0	0	0	0	7.25e-05	0	0	0	0	0.000475285	0	0	0.000172451	0	0.000147016	0.00577589	4.92e-05	0.000190168	0	0	0	0.00620797	0.00361234	0	0.000167588	0	0.019398	0	0.000499938	0	0.000578226	0.000112423	0.0117547	0.00123034	3.60118e-05	0.00255229
Streptococcus sp. oral taxon 066	5.38e-05	0	0.000160849	0	0	0.000107585	0.000592827	0	0.00324074	0	0	0.000217644	0	5.92e-05	0	0	0	0	0	0	0	7.35e-05	0.00539084	0	0.000380337	0	0.0212766	0	0.00496637	0	0.000664838	0.000335177	0	7.43e-05	0	0.0106237	0	0.000165207	0.000224845	0.000423594	0.0012258	0.000221632	0.00234733
Lachnospiraceae [G-2] sp. oral taxon 088	0	0	0	0	0	0	0	0	0.00026455	0	0	0	0	0	0.0485453	0	0	0	0	0	0	0	0	0	0	0	0	0	0	0	0	0	0	0	0	0	0	0	0	0	0.00122025	0.00244049	0
Enterobacter hormaechei	0	0	0	0	0	0	0	0	0	0	0	0	0	0.000118357	0	0.0481945	0	0	0	0	0	0	0	0	0	0	0	0	0	0	0	0	0	0	0	0	0	0	0	0	0.00120782	0.00241564	0
Leptotrichia sp. oral taxon 498	0	0	0.00643397	0	0	0	0	0	0.000793651	0	0	0.000943122	0	0	0	0	0	0	0	0	0	0.000147016	0	4.92e-05	0	0.0199043	0	8.1e-05	0	0.00020642	0	0	0.0060603	0.00081754	0	0.00149981	0	0.00404758	0.00314784	0.00307106	0.00118007	0.000408537	0.00205432
Clostridiales [F-1][G-1] sp. oral taxon 093	0	0	0	0	0.0351986	0	0.00138326	0	0.00145503	0	0.000124541	0	0	0	0.00097524	0	0.000380228	0.00404265	0	0	0	0	0	0	0	0	0	0.000405154	0	0	0	0	0	0	0.00105159	0	0	0.000165207	0.00146149	0	0.00116608	0.00217798	0.000162287
Corynebacterium matruchotii	5.38e-05	0	8.04e-05	0	0	0	0.000988045	0.000123244	0.000330688	0	0.000186811	0.000362739	0	0	5.42e-05	0	0	0	0	0	0	7.35e-05	0	0	0.00323286	0.026164	0	8.1e-05	0	0.000516049	0	0.0015083	0.00857686	0	0.000131449	0	0	0.000330415	0.00359753	0	0.0011598	0.000108996	0.00232695
Streptococcus oralis	0.000161282	0	0	0	0	0.0256052	0.00088924	0	0	0	0	0.00435287	0	0	0.00010836	0	0.0109316	0	0	0.000431127	9.49e-05	7.35e-05	0.000256706	0	0	0	0.000385678	0	0.00186239	0.00010321	0	8.38e-05	0	0.000222965	0.000328623	0.000187477	0	0.000165207	0	0	0.0011561	0.00212398	0.000193135
Veillonella multispecies spp17 2	0	0	0.00892713	0.000285857	0	0.000215169	0.00148207	8.22e-05	0.000132275	0	6.23e-05	0.00101567	0	0	0	0	0.00152091	5.86e-05	5.69e-05	0	0	0	0	0.00216695	0.000190168	0	0.0143987	0	0.00206932	0	0	0	0	0.00512821	0	0.000187477	0	0.000991244	0	0.0069893	0.00114901	0.000691954	0.0016906
Fusobacterium sp. oral taxon 370 nov 97.86%	0	0	0	0	0.000170867	0	0	0	0	0	0	0	0	0	0.0456737	0	0	0	0	0	0	0	0	0	0	0	0	0	0	0	0	0	0	0	0	0	0	0	0	0	0.00114611	0.00229223	0
Porphyromonas catoniae	0.00107521	0	0	0.000714643	0	0.00516407	9.88e-05	0.00414921	0.000462963	0	0	0	0	0	0.027686	0	0	0	0.000113766	0	0	7.35e-05	0	0	0.00266236	0.000422	0	0	0	0.00010321	8.31e-05	0.000335177	0.000513584	0	0	0.000749906	0	0	0.000112423	0	0.001113	0.00197323	0.000266066
Leptotrichia wadei	0.0023117	0	0.00981181	0	0	0	0.00612588	0	0.00132275	0	0.000498163	0.000798027	0	0	0.00043344	0	0.00380228	0.000937427	5.69e-05	0	0	0	0.000513413	0	0	0	0.000321399	0.000567215	0	0.00020642	0	0	0.00169483	0.00178372	0	0.000249969	0	0.0106559	0.00123665	0.000847188	0.00110438	0.00130492	0.000951404
Leptotrichia sp. oral taxon 221	0	0	0.000965096	0	0	0	0.0278629	0	0	0	6.23e-05	0.00123331	0	0	0	0	0.00456274	0	0	0	0	0	0	0	9.51e-05	0.001266	0.00218551	0.00129649	0.000310398	0	0	0	0	7.43e-05	0.000262898	0.000937383	0	8.26e-05	0.000224845	0.00148258	0.00107261	0.00173432	0.000432532
Leptotrichia sp. oral taxon 219 nov 86.82%	0.00193538	0	0.0123854	0	0.000427168	0	0	0	0.000595238	0	0.000124541	0	0	0	0.00048762	0	0	0.000234357	0	0.00142272	0	7.35e-05	0	0	0	0	0	0.00162061	0	0	0	0	0	0	0.0224778	0	0	0	0	0	0.00104461	0.000880621	0.00127221
Streptococcus vestibularis	0	0	0	0	0	0.00753093	9.88e-05	0	0	0.000234494	0	0.000145096	0	0	0	0	0	0	0	0.00107782	0	0	0.000128353	0	0	0	0.0106062	0.00153958	0.000310398	0.0174425	0	0	0	0	0.000131449	6.25e-05	0.000297089	0.00148687	0.000224845	0.000105899	0.00103557	0.000454357	0.00170187
Streptococcus gordonii	0.000161282	0	0	0	0	0	0.000790436	0.000616219	0.00026455	0	0.000249082	0.00159605	0	0	0	0	0.000190114	5.86e-05	0.000113766	4.31e-05	9.49e-05	0.000367539	0	0	0	0.000844001	0.000449958	0	0	0.0251832	0	0	0.000308151	0.000148644	0.0085442	0.000187477	0	0.000495622	0	0.000105899	0.00102032	0.00020416	0.00192814
Fusobacterium multispecies spp9 2	0.000430084	0	0	0.0401629	0	0	0	0	0.000198413	0	0	0	0	0	0	0	0	0	0	0	0	0	0	0	0	0	0	0	0	0	0	0	0	0	0	0	0	0	0	0	0.00101979	0.00203957	0
Mycoplasma salivarium	0	3.55e-05	0	0.00343029	0.000683469	0.00828402	0	0	0	0.0250909	0	0	0	0	0	0	0.000475285	5.86e-05	0.000341297	0	0	0	0	0	0	0	6.43e-05	0	0	0	0	0.00108932	0	0	0	0	0	0	0	0	0.000988824	0.00191997	6.07171e-05
Fusobacterium multispecies spp25 2	0	0	0	0	0	0	0	0	0	0	6.23e-05	0	0	0	0	0	0.000190114	0	0.0342435	0	0	0	0	4.92e-05	0	0	0	0	0	0	0	0	0	0	0.00473217	0	0	0	0	0	0.000981931	0.00172479	0.000251651
TM7 [G-1] sp. oral taxon 349	0.000483845	0	0.00112594	0	0	0	0	0	0.000330688	0	0.000186811	0.000290192	0	0	0	0	0	0.00070307	0.000284414	0	0	0	0.000128353	0	0.000190168	0.000562667	0	0.000243092	0	0.00010321	0	0.00125691	0.0311746	0.000297287	0.000591522	6.25e-05	0	0.000495622	0.000674536	0	0.000979635	0.000170248	0.00188318
Lachnospiraceae [G] sp. Oral Taxon A17	0	0	0	0	0.000598035	0	0	0	0	0	0	0	0	0	0	0	0.0374525	0	0	0	0	0	0	0	0	0	0	0	0	0	0	0	0	0	0	0	0	0	0	0	0.000951263	0.00190253	0
Neisseria sicca	0	0	0.00691652	0	0	0.000322754	0	0.00583354	0	0	0	7.25e-05	0	0	0.0083979	0.00260511	0	0	0	0	0	7.35e-05	0	0	0.00446896	0.00520467	0	0.000243092	0	0	0.000332419	0	0.000256792	7.43e-05	0.000328623	0	0	0.00107385	0.00123665	0	0.000936029	0.00120742	0.000699624
Peptostreptococcus stomatis	0.000268803	0.00671356	0	0.000643179	0.00145237	0.000537924	0.00148207	0.000903788	0.00125661	0.000468988	0.00298898	0.00413523	5.44e-05	0.000177536	0.00200466	0	9.51e-05	0.0032224	0.0102389	0	0	0	0	0	0.000190168	0	0	0.000162061	0	0	0	0	0.000102717	7.43e-05	0.000131449	0	0	0	0.000112423	0	0.000935441	0.00183223	4.06904e-05
Aggregatibacter sp. oral taxon 898	0	0	0	0	0	0	0	0	0	0	0	0	0	0	0.0338083	0	0	0	0	0	0	0	0	0	0	7.03e-05	0	0	0	0	0	0	0.00261928	0	0	0	0	0	0	0	0.000912447	0.00169042	0.000141557
Stomatobaculum sp. oral taxon 097	0	0	0.000482548	0.00050025	0	0	0	0	0.000198413	0	0	0.000507835	0	0	0	0	0	5.86e-05	0	0.000689804	0	0	0.00821461	0	0	7.03e-05	0	0	0.00124159	0.00010321	8.31e-05	0.0110608	0	0.00289855	0	0.000687414	0.000519905	0.000826037	0	0.00826009	0.000910077	0.000121872	0.00178767
SR1 [G-1] sp. oral taxon 874	0.00172034	0	0	0	0.000598035	0	0.00375457	0	0.00125661	0	0.0117068	0.000145096	0	0	0.0005418	0	0	0	0	0	0.00189735	0	0.000128353	0	0.000760673	0.00119567	0	0	0.000103466	0.00134173	0.00315798	0	0.00066766	0	0	0.00549931	0.000668449	0	0.000899382	0	0.000901083	0.000986164	0.000759088
Bergeyella sp. oral taxon 931	0	0	0	0	0	0	0	0	0	0	0	0	0	0	0	0	0	0	0	0	0.00265629	0.00911497	0	0	0.0072264	0	0	0.00704967	0	0.00381876	0	0	0.000616301	0	0.00151167	0	0.00111408	0.000495622	0.00224845	0	0.000896305	0	0.00174715
Streptococcus sp. oral taxon 074 nov 97.79%	5.38e-05	0	0	0	0	0	0	4.11e-05	6.61e-05	0	0	0	0	0	0	0	0	0	0	0	0	0	0.00949814	0.000147747	0	0	0	8.1e-05	0	0	0	0	0	0.00364177	0	0	0	0.0206509	0	0.000423594	0.000865104	8.05e-06	0.0018128
TM7 [G-1] sp. oral taxon 346	0.000483845	0	0.00603185	0	0	0	0	0	0.00132275	0	0.000373622	0.00442542	0	0	0	0	0	0	0	0	0	0.000147016	0.000128353	0	0	0.00323534	0	0	0	0	0	0	0.0166915	0	0.000460072	0.000187477	0	0	0.000562114	0.000211797	0.000856529	0.000631874	0.00113809
Citrobacter rodentium	0	0	0	0	0	0	0	0	0	0.0336499	0	0	0	0	0	0	0	0	0	0	0	0	0	0	0	0	0	0	0	0	0	0	0	0	0	0	0	0	0	0	0.000841248	0.0016825	0
Catonella sp. oral taxon 451	0	0	0	0	0.00299017	0	0	0	0.000330688	0	0.0155053	0.000362739	0	0	0.0100233	0	0	0.00251933	0	0	0	0	0	0	0	0	0	0	0	0	0	0	0	0	6.57e-05	0	0	0	0.000337268	0	0.000803363	0.00158658	2.12088e-05
Kingella denitrificans	0.000645127	0	0.00402123	0.000142929	0.000170867	0	0	0.00176649	0.00277778	0	0	0.0018137	0	5.92e-05	0.0035217	0.000361821	0.0013308	0	0	0	0.000664074	0	0	0	0.000760673	0.000351667	0	0	0	0.000412839	0	0	0.00888501	0	0	0.000249969	0	0	0.00393479	0	0.000796767	0.000830582	0.000768155
multigenus multispecies spp5 3	0	0	0	0	0	0	0	0	0	0.0316567	0	0	0	0	0	0	0	0	0	0	0	0	0	0	0	0	0	0	0	0	0	0	0	0	0	0	0	0	0	0	0.000791418	0.00158284	0
Aggregatibacter paraphrophilus nov 97.36%	0	0	0	0	0	0	0	0	0	0	0	0	0	0	0	0	0	0	0	0	0	0	0	0	0	0	0	0	0	0.0315822	0	0	0	0	0	0	0	0	0	0	0.000789555	0	0.00166222
Actinomyces sp. oral taxon 172	0	0	0.000160849	0	0	0	0	0	0	0	0	0.00188624	0	0	0	0	0	0	0	0	0	0	0.000256706	0	9.51e-05	0	0	0	0.000103466	0	0	0	0	0.00468227	6.57e-05	0	7.43e-05	0	0.000112423	0.024039	0.000786901	0.000102355	0.00154889
Lachnoanaerobaculum umeaense	0.000161282	0.000106564	0	0	0	0	0	0.000205406	0.000198413	0	0.000186811	0.000943122	0	0	0.00032508	0	0	0.000468713	0	0.00448373	0	0	0.00038506	0	0	0.008018	6.43e-05	0	0.00144853	0.00010321	0.00016621	0.00628456	0.000205434	0	0.00144594	0.000624922	0.00304516	0.000495622	0.000112423	0.00105898	0.000763437	0.000353956	0.00123465
Ralstonia sp. oral taxon 406	0	0.00788576	0	0	0	0	0	0.0221017	0	0	0	0	0.000435303	0	0	0	0	0	0	0	0	0	0	0	0	0	0	8.1e-05	0	0	0	0	0	0	0	0	0	0	0	0	0.000762595	0.00152114	4.26316e-06
Streptococcus sp. oral taxon 058	0.000698887	0	0	0	0	0.00322754	0	0.000123244	0.000462963	0	0	7.25e-05	0	0	0	0	0	0	0	0.000388015	9.49e-05	0.000588062	0.000128353	0	0.00114101	0	0	0	0.000310398	0.00608938	0.00157899	8.38e-05	0.00991218	0	0	0.0031871	0.000148544	8.26e-05	0.00134907	0.000211797	0.000746983	0.000248658	0.00130586
Bacteroides fragilis	0	0	0	0	0.000341734	0	0	0	0	0	0.00896693	0.0201683	0	0	0	0	0	0	0	0	0	0	0	0	0	0	0	0	0	0	0	0	0	0	0	0	0	0	0	0	0.000736924	0.00147385	0
TM7 [G-1] sp. oral taxon 347	0	0	0	0	0	0	0.0115601	0	0.000198413	0	0	0	0	0	0	0	0	0	0	0	0	7.35e-05	0	0	0.000570505	0.000492334	0	0.000891338	0	0.0101146	0	0	0.00190026	0	0.00276043	0	0	0	0	0	0.000714037	0.000587927	0.000884365
Lachnospiraceae [G-7] sp. oral taxon 163	0	0.000106564	0.000241274	0	0	0	0	0	0.0265212	0	0	0.000290192	0	0	0	0	0	0.000292946	0.000910125	0	0	0	0	0	0	0	0	0	0	0	0	0	0	0	0	0	0	0	0	0	0.000709057	0.00141811	0
Rothia dentocariosa	0	0	0	0	0	0	9.88e-05	0	0	0	0	0.00856065	0	0	5.42e-05	0	0	0	0	0	0	0.000367539	0.00102683	0.000640236	0.000760673	0.000140667	0.00321399	0.000324123	0	0.000516049	0	0.000418971	0	0.000445931	0.00328623	0.000374953	0	0.00784735	0.000112423	0	0.00070474	0.000435683	0.00102505
Filifactor alocis	5.38e-05	0.0044757	0.000160849	0	0.00299017	0	0	0	0.000462963	0	0.000871785	7.25e-05	0	0	0.00769356	0	0	0.00691352	0	0	0	0	0	0	0	0	0	0.000324123	0	0	0	0	0	0.000371609	0.00262898	0	0	0.000165207	0.000786959	0	0.000699293	0.00118474	0.000225099
SR1 [G-1] sp. oral taxon 875	0	0	0	0	0.00187954	0	0	0	0.00152116	0	0.00684974	0	0	0	0	0	0	0	0	0	0	0	0	0	0.000190168	0	0	0	0.000620797	0	0.00108036	0	0	0	0.00749261	0.000624922	0.00757576	0	0	0	0.000695876	0.000512522	0.000925506
Prevotella sp. oral taxon 317	0.00112897	0	0.000241274	0	0	0	0	0	6.61e-05	0	0.000311352	0	0	0	0	0	0	0	0	0	0	7.35e-05	0	0	0.000855757	0.001055	0	0	0	0	0	0	0.0228031	7.43e-05	0.000197174	0.000437445	0	0.000413018	0.000112423	0	0.000694236	8.73849e-05	0.00136957
TM7 [G-6] sp. oral taxon 870	0.000107521	0	0.00128679	0	0	0	0	0.000287569	6.61e-05	0	0	0.00391759	0.000163239	0	0	0	9.51e-05	0	5.69e-05	0	0.000664074	0.0130109	0	0	0.000475421	0	0	0.00275504	0.000724263	0.00268345	0	0	0	0	0	6.25e-05	0.000148544	8.26e-05	0.000674536	0.000317696	0.000689496	0.00029904	0.00110184
Haemophilus sp. oral taxon 908 nov 96.74%	0	0	0	0	0	0	0	0	0	0	0	0	0	0	0	0	0	0	0	0	0	0.0267568	0	0	0	0	0	0	0	0	0	0	0	0	0	0	0	0	0	0	0.000668921	0	0.00140825
Streptococcus tigurinus	0.000268803	0	8.04e-05	0	0	0.00182894	0.00484142	0	0.00026455	0	0.000435893	7.25e-05	0.00038089	0	0	0	0.00779468	0.000468713	5.69e-05	0.000344902	0	0.000441047	0	0	0.000950841	0.000281334	0.000192839	8.1e-05	0	0.00175457	0	0	0.00220841	0.000371609	0.00256326	0.000187477	0	0.000660829	0.000112423	0	0.000666106	0.000841929	0.000516086
Abiotrophia defectiva	0.000161282	0	0	0.000643179	0	0.000537924	0	8.22e-05	0	0	0	0.00246663	0.000163239	5.92e-05	0	0	0	0.000175768	5.69e-05	0	9.49e-05	0.00220523	0.000128353	0	0.000475421	7.03e-05	0	8.1e-05	0	0.0173393	0	0	0.00112988	0	0	6.25e-05	0	0	0.000674536	0	0.000665193	0.000217316	0.00116666
Prevotella pallens	0	0	0.00345826	0.000214393	0	0.00333513	0.00503903	0.00156109	0	0	0	0.00123331	0	0.000177536	0	0	0	0.000820248	0	0	0	0	0.000256706	0	0.000190168	0	0	8.1e-05	0.000517331	0.000309629	0	0	0.000462226	0.0017094	0.000197174	0.000124984	0	0.00206509	0.000224845	0.00455364	0.00066328	0.00079195	0.000562747
Prevotella sp. oral taxon 314	5.38e-05	0	0.000241274	0	0	0	0	0	0.00026455	0	6.23e-05	0	0	0	0	0	0	0	0	0.00254365	9.49e-05	0.000147016	0	0	0.0018066	0	0	8.1e-05	0.00217279	0.00154815	0	0	0.00359509	0.00230398	0.00387775	0.000437445	0.000816993	0.000165207	0.000786959	0.00508313	0.000652064	0.000158279	0.00120116
Alloprevotella tannerae	0.000645127	0	0.000321699	0.000285857	8.54e-05	0	0.00207489	0.00308109	0.000529101	0	0.000186811	0.00536854	0	5.92e-05	5.42e-05	0	0	0.0097258	0	0	9.49e-05	7.35e-05	0	0	0	0	0	0.000162061	0	0	0	0.000251383	0.000719018	0	0.00138022	0.000249969	7.43e-05	0.000330415	0	0	0.000643837	0.00112089	0.000170572
Prevotella loescheii	0	0	0	0	0	0	0	0	0.00026455	0	0.000124541	0	0	0	0	0	0	0	0	0	0	0	0	0	0	0.0252497	0	0	0	0	0	0	5.14e-05	0	0	0	0	0	0	0	0.000642254	1.94546e-05	0.00133164
Treponema sp. oral taxon 237	0.000376324	0	0	0	0.00529688	0	0.00088924	0	0.00125661	0	0.00498163	0	0	0	0	0	0.000190114	0.000644481	0	0	0	0	0	0	9.51e-05	0	0	0	0	0	0	0	0.000102717	0.000148644	0.010253	0	0	0	0.00123665	0	0.000636786	0.000681764	0.000622955
Rothia aeria	0	0	0	0	0	0	0	0	0	0	0	0	0	0	5.42e-05	0	0	0	0	0	0.000474338	0.00154366	0.00115518	4.92e-05	0.00247219	0.000351667	0	0	0	0.00113531	0	0.0103067	0.000256792	7.43e-05	0.000131449	0.000249969	0	0.00173468	0.00539629	0	0.000634648	2.71e-06	0.00130828
Treponema sp. oral taxon 230	5.38e-05	0	0	0	0	0	0	0	0.00112434	0	0.0166262	0.000217644	0	0	0	0	0	0.00527303	0	0	0	0	0	0	0	0	0	0	0	0	0	0	0	0	0.00197174	0	0	0	0	0	0.000631668	0.00116475	0.000103776
Prevotella bivia nov 92.91%	0	0	0	0	0	0	0	0	0.0251984	0	0	0	0	0	0	0	0	0	0	0	0	0	0	0	0	0	0	0	0	0	0	0	0	0	0	0	0	0	0	0	0.00062996	0.00125992	0
Capnocytophaga sp. oral taxon 332	0.000161282	0	0	0	0	0	0	0	0	0	0	0	0	0	0.00070434	0	0	0	0	0	0.000189735	0.000294031	0	0	0.00370828	0.000773667	0	8.1e-05	0	0.000516049	0.00124657	0	0.00867958	0	0	0.00331209	0	0.000413018	0.00483418	0	0.000622845	4.32811e-05	0.00125571
Bacteroidales [G-2] sp. oral taxon 274	0.000806408	0	0	0	0	0.000322754	0	0	0.00588624	0	0.000747245	0.000145096	0.00429862	0	0.00037926	0	0	0	0	0	0	0	0.000128353	0	0.00275744	0.00182867	0	0	0	0	0	0	0.00554671	0	0.00085442	0	0	0	0.000562114	0	0.000606583	0.000629281	0.000614616
Leptotrichia sp. oral taxon 221 nov 87.61%	0.000268803	0	0.00546888	0.0134353	8.54e-05	0.00387305	0	0	0.00026455	0	0.000249082	0	0	0	0	0	0	0	0.000341297	0	0	0	0	0	9.51e-05	0	0	0	0	0	0	0	0	0	0	0	0	0	0	0	0.000602036	0.00119932	5.00526e-06
Selenomonas sputigena	0	0.000674908	8.04e-05	0	0.000341734	0	0	0	0.000132275	0	0.0133259	7.25e-05	0.000707368	0	0.0005418	0	0.000570342	0.0048629	0.000227531	4.31e-05	0	0	0	0	0	0	0	0	0	0	0	0	0.000102717	0	0.00197174	0	0	0.000165207	0.000112423	0	0.00059832	0.00107904	0.000123794
Peptostreptococcaceae [XI][G-7] sp. oral taxon 081	0	0	0	0	0.00555318	0.000430339	0.000197609	0	0.000396825	0	0.000435893	0	0	0	0.012949	0	0	0.00158191	0	4.31e-05	0	0	0	0	0	0	0	0	0	0	0	0	0	0	0.00184029	0	0	0	0.000224845	0	0.000591325	0.00107939	0.000108691
Streptococcus multispecies spp42 2	0	0	0	0	0	0	0	0.000205406	0	0	0.000124541	7.25e-05	0	0	0	0	0	0	0	4.31e-05	0	0	0.00770119	0	0.000190168	0	0.000128559	0	0.00320745	0.00010321	0.00282556	0.000251383	0	0	0	0.00849894	0	0.000247811	0	0	0.000589996	2.22774e-05	0.00121865
Leptotrichia sp. Oral Taxon B57	0	0	0.00369953	0	0.000854336	0	0	0	0	0	0	0	0	0	0	0	0	0.00966721	0	0	0	0	0	0	0	0	0	0	0	0	0	0	0.000102717	0	0.00414065	0.000187477	0	0.000826037	0.00404722	0	0.00058813	0.000711054	0.000489689
Leptotrichia sp. oral taxon 909	0	0	0	0	0	0	0	0	0	0	0	0	0	0	0.0197757	0	0	0	0	0	0	0	0	0	0.000285252	7.03e-05	0	0	0	0	0	0	0	0	0	0	0	0	0.00326026	0	0.000584788	0.000988785	0.000190306
Treponema denticola	0.000322563	0	8.04e-05	0	0.00111064	0	0	0	0.00171958	0	0.0016813	0.000362739	0	0	0.00536382	0	0	0.00708929	0	0	0	0	0	0	0	0	0	0.000162061	0	0	0	0	0	0.000520253	0.00420638	0	0	0.000165207	0.000337268	0.000105899	0.000580685	0.000886516	0.000289319
Streptococcus peroris	0	0	0	0	0	0	0	0	0	0	0	0	0	0	0	0	0	0	0	0	0	0	0	0	0	0	0	0	0.000310398	0.00010321	0	0	0	0.0223709	0	0.000187477	0	0.000165207	0	0	0.000578429	0	0.00121775
Cardiobacterium valvarum nov 95.28%	0	0	0	0	0	0	0.000197609	0	0	0	6.23e-05	0	0	0	0	0	0	0	0	0	0	0	0	0	0	0.0220143	0	0	0	0	0	0	0	0	0	0	0	0	0	0	0.000556856	1.29955e-05	0.00115865
Oribacterium sp. oral taxon 102	0	0.00763711	0	0.000714643	8.54e-05	0	0	0	0	0	0.000249082	0	0	0	0	0	0.0121673	0.00123037	0	0	0	0	0	0	0	0	0	0	0	0	0	0	0	0	0	0	0	0	0	0	0.000552098	0.0011042	0
Treponema sp. oral taxon 238	0	0	0	0	0.00358821	0	0	0	0	0	0.00547979	0.000290192	0	0	0	0	0	0.000175768	0	0	0	0	0	0	0	0	0	0	0	0	0	0	0	0	0.0119619	0	0	0	0	0	0.000537396	0.000476698	0.000629573
Prevotella sp. oral taxon 472	0.000322563	0	0	0	0	0	0	0	0.00152116	0	0	0	0	0	0.00048762	0	0	0	0	0	0	0	0	0	0.00152135	0.0131523	0	0	0	0.00330271	0	0	0.000873093	0	0	0	0	0	0	0	0.000529521	0.000116567	0.000992079
Lachnospiraceae [G-3] sp. oral taxon 100	5.38e-05	0.000142086	0	0	0	0	0.000790436	0	0.000595238	0	0.000124541	0.000145096	0	0	0.00043344	0	0	0.00187485	0	0	0	0	0.000128353	0	0.00275744	0.003587	0	0	0	0	0	0.00410592	0.00446818	0	0	0.000187477	0.000148544	0	0.00157392	0	0.000527908	0.000207975	0.000892465
Neisseria bacilliformis	0.000107521	0	0.000482548	0	0	0.000107585	0.0179824	0	0	0	0	0	0.000326477	0	0	0	0.000285171	0	0	0	9.49e-05	0	0	0	0	0.00119567	0	0	0	0	0	0	0	0	0	0	0	8.26e-05	0	0	0.000516622	0.000964586	6.72772e-05
Lachnoanaerobaculum saburreum	5.38e-05	0.000532822	0.000160849	0	0	0	0.000395218	0.000698381	6.61e-05	0	6.23e-05	7.25e-05	0	0	0	0	0	0.00152332	0	0	0	0	0.000128353	4.92e-05	9.51e-05	0.000562667	0.000128559	0	0.000310398	0.00010321	0	0.0086308	0.0018489	0.000966184	0	0.000249969	0.000668449	0.00156947	0.00157392	0.000105899	0.000513909	0.000178264	0.000894267
Bacteroides ovatus	0	0	0	0	0	0	0	0	0.020172	0	0	0	0	0	0	0	0	0	0	0	0	0	0	0	0	0	0	0	0	0	0	0	0	0	0	0	0	0	0	0	0.000504299	0.0010086	0
Johnsonella sp. oral taxon 166	0	0	0	0	0	0	0	0	0	0	0	0	0	0	5.42e-05	0	0	0.00339817	0	0	0	0	0	0	0	0	0	0.000324123	0	0	0	0	5.14e-05	0	0.0156425	6.25e-05	0	8.26e-05	0.000449691	0	0.000501629	0.000172619	0.000874356
Klebsiella sp. Oral Taxon A36	0	0	0	0	0	0	0	0	0	0.019932	0	0	0	0	0	0	0	5.86e-05	0	0	0	0	0	0	0	0	0	0	0	0	0	0	0	0	0	0	0	0	0	0	0.000499765	0.00099953	0
Mogibacterium diversum	0	0.000284172	0.000723822	0	0.00145237	0	0.00108685	0.000410813	0.00218254	0.000117247	6.23e-05	0.00108822	0.0016868	0	5.42e-05	0	0.00228137	0.00158191	0.000227531	0	9.49e-05	0	0	0	9.51e-05	0	0.00102848	0.000162061	0.000310398	0	0	0	0	0.00156076	0.000131449	0	0	0.000660829	0	0.00232977	0.000490347	0.000662007	0.000330465
Lactococcus lactis	0	0	0	0	0	0	0	0	0	0.019463	0	0	0	0	0	0	0	0	0	0	0	0	0	0	0	0	0	0	0	0	0	8.38e-05	0	0	0	0	0	0	0	0	0.00048867	0.00097315	4.41053e-06
Erwinia aphidicola	0	0	0	0	0	0	0	0	0	0.0193458	0	0	0	0	0	0	0	0	0	0	0	0	0	0	0	0	0	0	0	0	0	0	0	0	0	0	0	0	0	0	0.000483644	0.000967288	0
Prevotella sp. oral taxon 942	0	0	0.000402123	0	0	0	0	0	0.000198413	0	0	0	0.000925019	0	0.00119196	0	0	0.000996016	0.0049488	0	0	0	0	0	0	0	0	0	0	0	0	0	0	0	0.0105159	0	0	0	0	0	0.000479457	0.000433117	0.00055347
Gemella sanguinis	5.38e-05	0	0	0	0	0	0	0	6.61e-05	0	0	0.000943122	0	0	0	0	0.000285171	0.000644481	0	0	0	0	0.00346554	0.000393992	0.000285252	0	0.000257119	0	0.000413864	0	0.00016621	0.000586559	0	0.0034188	0	0.000937383	0.00141117	0.00355196	0	0.00201207	0.000472315	9.96337e-05	0.000889469
Actinomyces sp. oral taxon 180	0	0	0.000241274	0	0	0	0	0	0.000132275	0	0	0	0	0	0	0	0	0	0.00182025	0	0	0	0.00154024	0	9.51e-05	0	0	0.000162061	0.00506984	0.00381876	0.00016621	0.000167588	0	0	0.00381203	0.000687414	0.000891266	0	0.000112423	0	0.000467918	0.00010969	0.000869628
Prevotella sp. oral taxon 475	0	0	0	0	0	0	0	0.00661408	0.000727513	0	0.002304	0.00116077	0	0	0.00287154	0	0	0.000410124	0.00273038	0	0	0	0	0	0.00114101	0	0	0	0	0	0	0	0.000102717	0	6.57e-05	6.25e-05	0	8.26e-05	0	0	0.000456823	0.00084092	7.65541e-05
Finegoldia magna	0	0	0	0	0	0	0	0	0	0.000703482	0	0.00203134	0.000163239	0.000177536	0	0	0.0143536	0.000410124	0	0	0.000284603	0	0	0	0	0	0	0	0	0	0	0	0	0	0	0	0.000148544	0	0	0	0.000456812	0.000891967	7.81811e-06
Staphylococcus aureus	0	0	0	7.15e-05	0	0	0	0	0	0	0	0	0	0.00142029	0	0.0164267	9.51e-05	0	0	0	0	0	0	0	0	0	0	0	0	0	0	0	0	0	0	0	0	0	0	0	0.000450339	0.000900677	0
Mycoplasma faucium	0	0	0.000643397	0	0.000939769	0	0	0	0.000132275	0	0	0	0	0	0	0	0.0131179	0.000644481	0	0	0	0	0	0	0	0	0	0	0	0	0	0	0	0.000371609	0.00197174	0	0	0.000165207	0	0	0.000449659	0.00077389	0.000132029
Lachnoanaerobaculum orale	5.38e-05	0.000142086	0	0.000285857	0	0	0	0	0	0	0	0.0016686	0	0	0.00059598	0	0.00104563	0.000585892	5.69e-05	0.00103471	0	0	0	0	9.51e-05	0	0.000707077	0	0.000103466	0	0.000664838	0.00209486	0	0.00133779	0.000262898	0.000187477	0.00430778	0.00123905	0.000112423	0.00127078	0.000446325	0.000273472	0.000651766
Treponema sp. oral taxon 258	0.000107521	0	0	0	0.0012815	0	0	0	0.000595238	0	0.0113955	0.000435287	0	0.000118357	0.00167958	0	0	0.0010546	0	0	0	0	0	0	0	0	0	0	0	0	0	0	0	0	0.00105159	0	0	0	0	0	0.000442979	0.000833379	5.53471e-05
Fretibacterium sp. oral taxon 362	0	0	0.000241274	0	0.0164887	0	0	0	0	0	0	7.25e-05	0	0	0	0	0	0	0	0	0	0	0	0	0	0	0	0	0	0	0	0	0	0	0.000722971	0	0	0	0	0	0.000438136	0.000840123	3.80511e-05
Actinomyces lingnae [NVP]	0	0.000142086	0	0.000357322	0	0	0.000790436	8.22e-05	0.000661376	0	0	0.000217644	0	0	0	0	0	0	0.000113766	0.000215564	0	0	0.00179695	0.00192071	0	0	0.00302115	0	0.000620797	0	8.31e-05	8.38e-05	0	0.0034188	6.57e-05	0.000687414	0.000148544	0.0022303	0	0.00074129	0.000434974	0.00012902	0.000779924
Prevotella baroniae	0.000107521	0	0	0	0.0107646	0	0	0	0	0	0	0	0	0	5.42e-05	0	0	0.000292946	0.00136519	0	0	0	0	0	0	0	0	0	0	0	0	0	0	0	0.00460072	6.25e-05	0	0	0	0	0.000431193	0.000629224	0.000245433
Leptotrichia sp. oral taxon 215 nov 96.76%	0.000376324	0	0	0	0	0	0	0	0.000595238	0	0	0	0	0	0.00048762	0	0	0	0	0.0108213	0	0	0	0	0	0.000351667	0	0	0.000413864	0	0.000249314	0	0	0	0	0.0031871	0.000222816	0	0	0.000211797	0.000422926	0.000614024	0.000244029
Porphyromonas sp. oral taxon 275	0	0	0	0	0	0.000322754	0	0.000369731	0.000396825	0	0	0	0	0	0	7.24e-05	0	0	0.00910125	0	0	0	0	0	0	0	0	0	0	0	0	0	0.00616301	0	0	6.25e-05	0	0	0.000337268	0	0.000420644	0.000513148	0.000345409
Fusobacterium multispecies spp20 2	0.00989194	0	0	0	0.000427168	0	0.000197609	0	0	0	0.00124541	0.000943122	0	0	5.42e-05	0	0	0	0	0.00185385	0	0	0	0	0	0	0	0	0	0	0	0	0.000616301	0.000148644	0	0.000187477	0	0.000330415	0	0.000423594	0.000407993	0.000730665	8.98122e-05
Parvimonas sp. oral taxon 393	0	0	0	0	0.000256301	0	0	0	0.000595238	0	0	0	0	0	0	0	0	0.00580033	0	0	0	0	0	0	0	0	0	0	0	0	0	0	0	0	0.00900427	0	0	0	0	0	0.000391403	0.000332593	0.000473909
Staphylococcus epidermidis	0	0	8.04e-05	0	0	0.012695	0.000197609	0	0	0	0	0.000580383	0	5.92e-05	0	0	0.000190114	0	0	0	0	0.000147016	0	0	0	0	0	0	0	0	0	0.00134071	0	0	0	0	7.43e-05	0	0	0	0.000384118	0.000690135	8.22117e-05
Citrobacter sp. str. KMSI 3	0	0	0	0	0	0	0	0	0	0.0151249	0	0.000217644	0	0	0	0	0	0	0	0	0	0	0	0	0	0	0	0	0	0	0	0	0	0	0	0	0	0	0	0	0.000383563	0.000767126	0
Bacteroidetes [G-5] sp. oral taxon 511	0	0	0	0	0	0	0	0	0	0	6.23e-05	0	0	0	0.00872298	0	0.000190114	0.0059761	0	0	0	0	0	0	0	0	0	0	0	0	0	0	5.14e-05	0	6.57e-05	0	0	0.000165207	0	0	0.000380845	0.000747574	1.48583e-05
Ruminococcaceae [G-1] sp. oral taxon 075 nov 94.74%	0	0	0	0	0	0	0	0	0	0	0	0	0	0	0	0	0	0.0146473	0	0	0	0	0	0	0	0	0	0	0	0	0	0	0	0	0	0	0.000222816	0	0	0	0.000371753	0.000732365	1.17272e-05
Prevotella shahii	0.000107521	0	0	0	0.00709099	0	0.000494022	0	0.000198413	0	0.00118314	7.25e-05	0	0	0	0	0	0	0	0.00301789	0	0	0.000256706	0	0	0	0	0	0	0	8.31e-05	0	0	0	0.00216891	6.25e-05	0	0	0	0	0.000368392	0.000608224	0.000135327
Peptoniphilus lacrimalis	0	0	0	0	0	0	0	0	0	0	0	0	0.000217652	0	0	0	0.0142586	0	0	0	0	0	0	0	0	0	0	0	0	0	0	0	0	0	0	0	0	0	0	0	0.000361905	0.00072381	0
Capnocytophaga sp. oral taxon 335	0	0	0	0	0	0	0	0	0	0	0	0	0.0143106	0	0	0	0	0	0	0	0	0	0	0	0	0	0	0	0	0	0	0	0.000154075	0	0	0	0	0	0	0	0.000361617	0.000715529	8.10921e-06
Peptoniphilus indolicus	0	0.00024865	0	0	0	0	0	0	0	0	0.000124541	0	0	0	0	0	0.0136882	0.000351535	0	0	0	0	0	0	0	0	0	0	0	0	0	0	0	0	0	0	0	0	0	0	0.000360323	0.000720647	0
Leuconostoc citreum	0	0	0	0	0	0	0	0	0	0.0141869	0	0	0	0	0	0	0	0	0	0	0	0	0	0	0	0	0	0	0	0	0	0	0	0	0	0	0	0	0	0	0.000354672	0.000709345	0
Ottowia sp. oral taxon 894	0	0	0	0	0	0	0	0.000287569	0.000396825	0	0	0	0.00103385	0	0.00092106	0	0	0	0	0	0	0	0	0	0.00732148	0.000211	0	8.1e-05	0	0	0.000249314	0	0	0	0	0	0	0	0.00326026	0.000105899	0.000346706	0.000131965	0.000590997
Enterococcus faecalis	0	0	0	0	0	0	0	0	0	0.0133662	0	0	0	0.000177536	0	0	0	0	0	0	0	0	0	0	0	0	0	0	0	0	0	0	0	0	0	0	0	0	0	0	0.000338592	0.000677185	0
Peptostreptococcaceae [XI][G-7] [Eubacterium] yurii subsps. yurii & margaretiae	5.38e-05	0	0	0	0.00239214	0	0	0	0.0010582	0	0.000249082	0	0	0	0.0070434	0	0	0	0	0	0	0	0	0	0	0.000281334	0	0	0	0	0	0	0	0	0.00223464	0	0	0	0	0	0.000332815	0.000539831	0.00013242
Fusobacterium sp. oral taxon 203	0	0.000106564	0	0	0.0010252	0	0	0	0	0	0.000560433	0.000725479	0	0	0.00043344	0	0	0	0.000113766	0	0	7.35e-05	0.000128353	0	0	0	6.43e-05	0	0	0	0	0.00963633	5.14e-05	0.000371609	0	0	0	0	0	0	0.00033226	0.000148244	0.000543447
Alloprevotella sp. oral taxon 308	0	0	0.000402123	0	0	0	0.000988045	0.000575138	0.000198413	0	0.000249082	0.00108822	0.00190445	0	5.42e-05	0	0	0	0	0	0.000189735	0	0	0	0.000475421	0	0	0	0.000206932	0	0	0	0	0.000966184	0	0	0	0.00322154	0	0.00275336	0.000331821	0.000272983	0.000401234
TM7 [G-5] sp. oral taxon 356	0	0	0.00595142	0	0	0	0	0	0	0	0.000249082	0	0	0	0	0	0	0	0	0	0	0	0	4.92e-05	0	0	6.43e-05	0	0	0	0	0	0.00200298	0.00178372	0.000197174	0.000937383	0	0.000578226	0.00112423	0.000317696	0.000331385	0.000310025	0.000371311
Aggregatibacter sp. oral taxon 949	0	0	0	0	0	0	0	0.000123244	0	0	0	0	0	0	0	0	0	0	0	0	0	0	0	0	0.00228202	0.001688	0	0	0	0	0	0	0.00883365	7.43e-05	0	0.000187477	0	0	0	0	0.000329717	6.1622e-06	0.000687655
Porphyromonas sp. oral taxon 278	0	0	0	0	8.54e-05	0	0	0.0013146	0	0	0.000124541	0	0.000652955	0	0.00010836	0	0	0	0	0	0	0	0	0	0.00171152	0.000211	0	0	0	0	0	0	0.0072929	0	0	0	0	0	0.00157392	0	0.00032688	0.000114293	0.000567859
Prevotella timonensis	0	0	0	0	0	0	0	0	0	0	0	0	0.0112635	0	0	0	0	0.00175767	0	0	0	0	0	0	0	0	0	0	0	0	0	0	0	0	0	0	0	0	0	0	0.000325529	0.000651057	0
Ruminococcaceae [G-2] sp. oral taxon 085	0	0	0	0.000214393	0	0	0.000592827	0	0.00026455	0	0.000124541	0.000580383	0	0	0	0	0	0.000117178	0	0	0	0	0.00154024	0	0	0.000914334	0.000449958	0	0.000206932	0	8.31e-05	0	0.000462226	0.00133779	6.57e-05	0.00056243	0.00148544	0	0	0.00381235	0.000320359	9.46936e-05	0.000574763
Streptococcus parasanguinis I	0	0.000177607	0	0	0	0.000215169	0	0	0	0	0.000747245	0.00116077	0.00038089	0	0	0	0	0.000527303	0.000113766	8.62e-05	9.49e-05	0	0.000641766	0.000246245	0	0	0.000192839	0	0.00258665	0	0	0.000167588	0	0.00193237	0.000131449	0.000187477	0.000297089	0.000495622	0	0.00232977	0.000317818	0.000170447	0.000484677
GN02 [G-1] sp. oral taxon 872	0	0	0	0	0	0	0	0	0	0	0	0	0	0	0	0	0	0	0	0	0	0	0	0	0	0.002321	0	0	0	0	0	0	0.00929588	0	0	0	0	0	0.000786959	0	0.000310096	0	0.000652834
Prevotella sp. oral taxon 313 nov 97.76%	0	0	0	0	0	0	0	0	0	0	0	0	0	0	0	0	0	0	0	0	0	0	0	0	0	0	0	0	0	0	0	0	0	0	0	0	0	0.0121427	0	0.000211797	0.000308863	0	0.000650239
Streptococcus anginosus	0	0.000390736	8.04e-05	7.15e-05	0	0.0027972	9.88e-05	0	6.61e-05	0	0.000186811	0.000217644	0	0	0	0	0	0.000527303	0.00341297	0	0	0	0	0	0	0	0	0	0	0.00010321	0	0.000167588	0	7.43e-05	0.00407493	0	0	0	0	0	0.000306737	0.000392473	0.000232633
Aggregatibacter sp. oral taxon 458	5.38e-05	0	0	0	0	0	0	0	0	0	0.000498163	0	0	0	0	0	0	0	0	0	0	0	0	0	0.000855757	0.00246167	6.43e-05	0.000162061	0	0	0	0	0.000719018	0	0	0.00193726	0	0.000413018	0.00449691	0.000105899	0.000294196	2.75982e-05	0.00059031
Streptococcus constellatus	0.00134401	3.55e-05	0	0	0.00256301	0.00623991	0	0	0	0	0	7.25e-05	0.000217652	5.92e-05	0.00010836	0	0	0	0.000284414	0	0	0	0	0	0	0	0	0	0	0.00010321	0	0	0	0	0.000394348	0	0	0	0.000337268	0	0.000293985	0.000546228	4.39382e-05
Corynebacterium matruchotii nov 97.17%	0	0	0	0	0	0	0	0	0	0	0	0	0	0	0	0	0	0	0	0	0	0	0	0	0	0.0117457	0	0	0	0	0	0	0	0	0	0	0	0	0	0	0.000293642	0	0.000618193
Capnocytophaga sp. oral taxon 326	0	0	0	0	0	0	0	0	0	0	0.000124541	0	0	0	0	0	0	0	0	0	0	0	0.000256706	4.92e-05	0.00161643	0.004853	0	0	0	0.00010321	0	0	0.00421139	0	0	0.000124984	0	0	0.000337268	0	0.000291918	6.22705e-06	0.00060801
Prevotella multiformis	0	0	0	0	0	0	0	0	6.61e-05	0	0	0	0	0	0	0	0	0.00960862	0.000284414	0	0	0	0	0	0	0	0.000192839	0	0	0	0	0	5.14e-05	0.000520253	0	0.000124984	0	0.000247811	0.000449691	0	0.000288653	0.000497957	8.35252e-05
Stomatobaculum longum	0	0	0.00120637	0.00178661	0	0	0	0.00123244	0.00112434	0	0	0.000652931	0	0	0	0	0	0.000292946	0.000511945	0	0	0	0	9.85e-05	0	0	0.000771357	0.000162061	0.000206932	0.00010321	0	0	0	0.00163508	0	0	0	0.000578226	0.000224845	0.000953087	0.000288522	0.000340379	0.000249121
Ottowia sp. oral taxon 894 nov 97.30%	0	0	0	0	0	0	0	0.00513516	0.00615079	0	0	0	0	0	0	0	0	0	0	0	0	0	0	0	0	0	0	0	0	0	0	0	0	0	0	0	0	0	0	0	0.000282149	0.000564298	0
Lachnospiraceae [G] sp. Oral Taxon B32	0.000268803	0	0.000160849	0	0.000170867	0	0.00256892	0	0.00178571	0	0	0	0	0	0	0	0	0	0	0	9.49e-05	0	0	0	9.51e-05	0.000140667	0	0.000162061	0	0	0	0.00243003	0	0	0.00223464	0	0	8.26e-05	0.0010118	0	0.000280174	0.000247757	0.000324047
Actinomyces graevenitzii	0	0	0	0.000357322	0	0.00107585	0.000988045	0.000246488	0	0	0	0	0	0	0	0	0	0	0	0	9.49e-05	0	0.000128353	4.92e-05	0.000475421	7.03e-05	0.00494954	0.000162061	0.000827729	0.00010321	0	0	0	0.000520253	0	6.25e-05	0.000445633	0	0	0.000635391	0.000279805	0.000133385	0.000443663
Prevotella multispecies spp21 2	0	0	0	0	0	0	0	0	0	0	0	0	0	0	0	0	0	0	0	0	0	0	0	0	0	0.011183	0	0	0	0	0	0	0	0	0	0	0	0	0	0	0.000279575	0	0.000588579
Capnocytophaga sp. oral taxon 864	0	0	0	0	0	0	0.00820077	0	0.000396825	0	0	0.000217644	0	0	0	0	0	0	0.000170648	0	0	0	0	0	0	0	0	0	0	0	0	0.00134071	0.000359509	0	0	0.000187477	0	0	0	0	0.00027184	0.000449294	9.93523e-05
Fretibacterium sp. oral taxon 359	0	0	0	0	0.00948313	0	0.000296413	0	0	0	6.23e-05	0	0	0	0	0	0	0	0	0	0	0	0	0	0	0	0	0	0	0	0	0	0	0	0.000985869	0	0	0	0	0	0.000270693	0.000492092	5.18878e-05
Oribacterium sp. oral taxon 078	0	0	8.04e-05	0	0	0	0.000691631	0	0.000132275	0	0	0	0	0	0	0	0	0	5.69e-05	0	0	0	0	4.92e-05	0	0	6.43e-05	0	0	0	0	0.00854701	0	7.43e-05	0	0	0	0.000578226	0	0.000211797	0.000262151	4.80603e-05	0.000501307
Catonella sp. oral taxon 164	0.000215042	0	0	0	0.00623665	0	0	0	0	0	0	0	0	0	0	0	0	0.00222639	0	0	0	0	0	0	0	0	0	0	0	0	0	0	0.000205434	0	0.00151167	0	0	0	0	0	0.00025988	0.000433904	9.03737e-05
Capnocytophaga sp. oral taxon 412	0	0	0	0	0	0	0.00405098	0	0	0	0.000124541	0	0.00587659	0	0	0	0	0	0	0	0	7.35e-05	0	0	0	0	0	0	0	0	0	0	5.14e-05	0	0	0	0	0	0	0.000105899	0.000257073	0.000502606	1.21473e-05
Citrobacter sedlakii	0	0	0	0	0	0	0	0	0	0.0100832	0	0	0	0	0	0	0	0	0	0	0	0	0	0	0	0	0	0	0	0	0	0	0	0	0	0	0	0	0	0	0.000252081	0.000504162	0
Bacteroidetes [G-5] sp. oral taxon 511 nov 87.78%	0	0	0	0	0	0	0	0	0	0	0.00990099	0.000145096	0	0	0	0	0	0	0	0	0	0	0	0	0	0	0	0	0	0	0	0	0	0	0	0	0	0	0	0	0.000251152	0.000502304	0
Selenomonas noxia	5.38e-05	0	0.000160849	0	0	0	0	0	0.000198413	0	0	7.25e-05	0	0	0	0	0	0	0	0	0	0	0	0	0	0.008018	0	0	0	0	0	0	0.00154075	0	0	0	0	0	0	0	0.000251108	2.42781e-05	0.000503093
Sphingomonas sp. oral taxon 006 nov 83.56%	0	0	0	0	0	0	0	0	0	0	0	0	0	0	0	0	0	0	0	0	0	0	0	0	0	0	0	0	0	0	0	0.00980392	0	0	0	0	0	0	0	0	0.000245098	0	0.000515996
Prevotella saccharolytica	0	0	0	0	0	0.000753093	0	0	0.0010582	0	0	0	0	0	0.00010836	0	0	0	0	0	0	7.35e-05	0	0	0.000475421	0.003587	0	0	0	0	0	0	0.000924452	0	0.00276043	0	0	0	0	0	0.000243512	9.59827e-05	0.000411622
Salmonella multispecies spp7 2	0	0	0	0	0	0	0	0	0	0.00961426	0	0	0	0	0	0	0	0	0	0	0	0	0	0	0	0	0	0	0	0	0	0	0	0	0	0	0	0	0	0	0.000240356	0.000480713	0
Fretibacterium fastidiosum	0	7.1e-05	0.00104552	0	0.00136694	0	0	0	0	0	6.23e-05	0	0	0	0	0	0.00304183	0.00134755	0	0	0	0	0	0	0	0	0	0	0	0	0	0	0	0.000371609	0.00124877	0	0	8.26e-05	0.000562114	0	0.000230006	0.000346757	0.000119215
Campylobacter sp. Oral Taxon G43	0	0	0	0	0	0	0	0	0	0	0	0	0	0	0	0	0	0	0	0	0	0	0	0	0	0	6.43e-05	0	0	0	0	0	0	0	0.00893855	0	0	8.26e-05	0	0	0.000227136	0	0.000478181
Prevotella aurantiaca	0	0	0	0	0	0	0	0	0	0	0	0	0	0	0	0	0	0	0	0	0	0	0	0	0	0	0	0	0	0	0.000332419	0	0	0	0	0.000124984	0.0085413	0	0	0	0.000224967	0	0.000473616
Capnocytophaga gingivalis nov 97.90%	0	0	0	0	0	0	0	0	0	0	0	0	0	0	0.0002709	0	0	0	0	0	0	0	0	0	0.000380337	0	0	0	0	0.000412839	0.00141278	0	0	0	0	0.0048119	0	0.000578226	0.00112423	0	0.00022478	1.3545e-05	0.000458964
Leptotrichia goodfellowii	0	0.00024865	0	0	0	0	0	0	0.00026455	0	0	0	0	0	0	0	0	0	0.00722412	0	0.000379471	0	0	0	0	0.000351667	0	0	0	0	0	0	0	0	0	0	0	0.000165207	0	0	0.000215842	0.000386866	2.72039e-05
Treponema lecithinolyticum	0.000913929	0	0	0	0.000768902	0	0	0	0.000198413	0	0	0	0	0	0.0002709	0	0.000760456	0.00316381	0	0	0	0	0	0	0	0	0	0	0	0	0	0	0	0.000148644	0.00223464	0	0	0	0	0	0.000211492	0.000303821	0.000125436
Fretibacterium sp. oral taxon 360	0	0	0.00120637	0	8.54e-05	0	0	0	0.00132275	0	0.000186811	0	0	0	0	0	0	0	0	0	0	0	0	0	0	0	0	0.000324123	0	0	0	0	0	0.000594575	0.0040092	0	0	0	0.000674536	0	0.000210094	0.000140067	0.000294865
Prevotella oulorum	0	0	0.000402123	0	0	0.000430339	0.00207489	0.000451894	0.00125661	0	0	0	0	0	0	0	0	0.000292946	5.69e-05	0	0	7.35e-05	0	0	0.000285252	7.03e-05	0	8.1e-05	0	0	0	0	0.00148939	0.000222965	0	0.000312461	0	0.000826037	0	0	0.000208165	0.000248286	0.00017689
Cupriavidus metallidurans	0	0.00305485	0	0	0	0	0	0.00509408	0	0	0	0	0	5.92e-05	0	0	0	0	0	0	0	0	0	0	0	0	0	0	0	0	0	0	0	0	0	0	0	0	0	0	0.000205203	0.000410406	0
Prevotella sp. oral taxon 443	0	0	0	0	0.000170867	0	9.88e-05	0	0.00218254	0	0	0	0	0	0.00048762	0	0	0.00421842	0	0	0	0	0	0	0	0	0	0	0	0	0	0	0	0	0.000591522	6.25e-05	0	8.26e-05	0.000224845	0	0.000202993	0.000357912	5.06035e-05
Bergeyella sp. oral taxon 900 nov 90.91%	0	0	0	0	0	0	0	0	0.00443122	0	0	0	0.00038089	0	0.00254646	0	0	0	0	0	0	0	0	0	0	0	0	0	0	0.000619259	0	0	0	0	0	0	0	0	0	0	0.000199446	0.000367928	3.25926e-05
Streptococcus sp. oral taxon 070	5.38e-05	0	0	0	0	0	0	0	0	0	0	0	0	0	0	0	0	0	0	0	0	0	0	4.92e-05	0	0	0	0	0	0.00165136	0	0	0.000102717	0.000297287	6.57e-05	0.0056243	0	0	0	0.000105899	0.000198756	2.69e-06	0.000415603
Bergeyella sp. oral taxon 900	0	0.000959079	0	0.000285857	0	0	0	0	0.00132275	0	0.000124541	0	0	0	0	0	0	0.000117178	0.000113766	0	0	0	0	0	0.000475421	0.00267267	0	8.1e-05	0	0	0	0	0.00164347	0	0	6.25e-05	0	0	0	0	0.000196456	0.000146159	0.00025974
Capnocytophaga sp. oral taxon 863	0	0	0	0	0	0	0	0	0.0010582	0	0	0	0	0	0.00021672	0	0	0	0	0	0	0	0	0	0.000570505	0	0	0	0	0.00010321	0.000914153	0	0.00128396	0	0.000197174	0.00212473	0	0.000330415	0.0010118	0	0.000195272	6.3746e-05	0.000343998
Pyramidobacter piscolens	0	0.000284172	0	0.000142929	0	0	0	0	0	0	0	0	0	0	0	0	0	0.0070307	0	0	0	0	0	0	0	0	0	0.000243092	0	0	0	0	0	7.43e-05	0	0	0	0	0	0	0.00019438	0.00037289	1.67048e-05
Neisseria sp. oral taxon 018	0	0	0	0	0	0	0	0.00032865	0.000992063	0	0	0	0.000108826	0	0.0062307	0	0	0	0	0	0	0	0	0	0	0	0	0	0	0	0	0	0	0	0	0	0	0	0	0	0.000191506	0.000383012	0
Neisseria sp. oral taxon 020	0	0	0	0	0	0	0	0	0.00138889	0	0	0	0.00342801	0	5.42e-05	0	0	0	0	0	0	0	0	0	0.0023771	0	0	0	0	0	0	0	0	0	6.57e-05	0	0	0	0.000224845	0	0.000188469	0.000243555	0.000140403
Manihot esculenta Oral Taxon C60	0	0	0	0	0	0.000430339	0	0	0.00145503	0.000234494	0	0	0	5.92e-05	0	0	0	0	0	0	0	0	0	0	0	0	0.000835637	0.000486184	0	0	0	0.00393833	0	0	0	0	0	0	0	0	0.00018598	0.000108953	0.00027685
Peptoniphilus indolicus nov 97.71%	0	0	0	0	0	0	0	0	0	0	0	0	0	0	0	0	0.00693916	0.000351535	0	0	0	0	0	0	0	0	0	0	0	0	0	0	0	0	0	0	0	0	0	0	0.000182267	0.000364535	0
Treponema sp. oral taxon 231	0.000268803	0	0	0	0	0	0	0	0.00224868	0	0.00317579	0.000870575	0	0	0.00037926	0	0	0.000234357	0	0	0	0	0	0	0	0	0	0	0	0	0	0	0	0	6.57e-05	0	0	0	0	0	0.000181079	0.000358873	3.45789e-06
Megasphaera micronuciformis	0	0	0.00128679	0.000142929	0	0	0.000296413	0	0.000198413	0	0	0.000145096	0	0	0	0	0.00342205	0.000117178	5.69e-05	0	0	0	0	0	0	0	6.43e-05	0	0	0	0	0	0	0.000445931	6.57e-05	0	0	8.26e-05	0	0.000635391	0.000173992	0.000283289	6.81012e-05
Pseudomonas otitidis	0	0	0	0	0	0	0	0	0	0	0	0	0	0	0	0.00557204	0.000285171	0	0	0	0	0	0	0	0	0	0	0.000324123	0	0	0	0.000670354	0	0	0	0	0	0	0	0	0.000171292	0.00029286	5.23409e-05
Veillonella sp. oral taxon 780	0.000483845	0	0	0	0.000170867	0	0	0	0.000132275	0	6.23e-05	0.000507835	0	0	5.42e-05	0	0.000855513	0.000117178	0.000113766	4.31e-05	0	0	0	0	0.000285252	0	0	0.00234989	0	0.000516049	0	0.000167588	0	0	0.000788695	0	0	0	0.000112423	0	0.000169019	0.000127044	0.0002221
Methylobacterium rhodesianum	0.000430084	0.00138534	0	0.00228686	0	0	0	0.0026292	0	0	0	0	0	0	0	0	0	0	0	0	0	0	0	0	0	0	0	0	0	0	0	0	0	0	0	0	0	0	0	0	0.000168287	0.000336574	0
Leptotrichia sp. oral taxon 218	0	0	0	0	0	0	0	0	0	0	0	0.00660186	0	0	0	0	0	0	0	0	0	0	0	0	0	0	0	0	0	0	0	0	0	7.43e-05	0	0	0	0	0	0	0.000166904	0.000330093	3.91053e-06
Cardiobacterium valvarum	0.000161282	0	0	0	0	0	0	0	0.000793651	0	0	0	0.000326477	0	0	0	0	0	0	0	0	0	0	0	0.000760673	0.000633	0	0	0	0	0	0	0.00318422	0	0	0	0	0.000247811	0.000562114	0	0.000166731	6.40705e-05	0.00028357
Bulleidia extructa	0.000107521	0.0062873	0	0	0.000256301	0	0	0	0	0	0	0	0	0	0	0	0	0	0	0	0	0	0	0	0	0	0	0	0	0	0	0	0	0	0	0	0	0	0	0	0.000166278	0.000332556	0
Afipia sp. genosp. 4	0	0	0	0	0	0	0	0.00032865	6.61e-05	0	0	0	0.00304712	0	0	0.000289457	0	0	0	0	0	0	0	0	0	0	0	0	0	0	0	0.002849	0	0	0	0	0	0	0	0	0.000164508	0.000186566	0.000149948
Alloscardovia omnicolens	0.000268803	0	0	0.00343029	0	0.000322754	0.00207489	0	0	0	0	7.25e-05	0	0	0	0	0	0.000234357	5.69e-05	0	0	0	0	0	0	0	0	0	0	0	0	0	0	0	0	0	0	0	0	0	0.000161512	0.000323025	0
Fusobacterium periodonticum nov 97.14%	0.00172034	0	0.00152807	0	0.00119607	0	0	0	0	0	0.000124541	0	0	0	0	0	0	0	0	0.00146583	0	0	0	0	0	0	0	0	0	0	0	0	0	0	0.000394348	0	0	0	0	0	0.00016073	0.000301742	2.07552e-05
Peptostreptococcaceae [XI][G-1] [Eubacterium] sulci	0	3.55e-05	0	0	0	0	0	0.000246488	0	0	0.000249082	0.000217644	0	0	0	0	0	0	0.000113766	0	0	0	0	0	0	0	0	0	0.000206932	0	0	0	0	0.000445931	0	0	0.000297089	0.000330415	0	0.00423594	0.00015947	4.3124e-05	0.000290332
Prevotella denticola nov 93.27%	0	3.55e-05	0	0	0.000170867	0	0	0	0	0	0.000124541	0	0	0	0	0	0	0	0	0	0	0	0	0	0	0	0.00115704	8.1e-05	0.000724263	0	0	0	0.000308151	0.000668896	0	6.25e-05	0	0.000330415	0	0.00264746	0.000157766	1.65454e-05	0.000314722
Diaphorobacter nitroreducens Oral Taxon A07	0	0	0	0	0	0	0	0	0	0	0	0	0	0	0	0	0	0	0	0	0	0	0	0	0	0	0	0.000162061	0	0.00010321	0	0.00544662	0	0	0	0	0	0	0.000562114	0	0.00015685	0	0.000330211
Ottowia sp. oral taxon 894 nov 97.31%	5.38e-05	0	0	0	0	0	0	0.00349191	0.00271164	0	0	0	0	0	0	0	0	0	0	0	0	0	0	0	0	0	0	0	0	0	0	0	0	0	0	0	0	0	0	0	0.000156434	0.000312867	0
Leptotrichia goodfellowii nov 91.70%	0	0	0	0	0	0	0	0	0	0	0	0	0	0	0	0	0	0	0	0	0	0	0	0	0	0	0	0.00623937	0	0	0	0	0	0	0	0	0	0	0	0	0.000155984	0	0.000328388
Haemophilus sp. oral taxon 908 nov 97.35%	0	0	0	0	0	0	0	0	0	0	0	0	0	0.00597704	0	0	0	0	0	0	0	0	0	0	0	0	0	0.000243092	0	0	0	0	0	0	0	0	0	0	0	0	0.000155503	0.000298852	1.27943e-05
Enterobacter cancerogenus	0	0	0	0	0	0	0	0	0	0.000117247	0	0	0	0	0	0.00600622	0	0	0	0	0	0	0	0	0	0	0	0	0	0	0	0	0	0	0	0	0	0	0	0	0.000153087	0.000306173	0
Kocuria sediminis	0	0	0	0.000214393	0	0	0	0	0	0	0	0	0	0	0	0	0	0.000117178	0	0	0	0	0	0	0	0	0	0	0	0	0	0.0057818	0	0	0	0	0	0	0	0	0.000152834	1.65786e-05	0.000304305
Alloprevotella rava	0	0	0.0049059	0.000214393	0	0	0	0	0	0	0	7.25e-05	0	0	0	0	0	0.000234357	0	0	0	7.35e-05	0	0	0	0	0	8.1e-05	0	0	0	0	0	0	0.000197174	6.25e-05	0	0.000247811	0	0	0.000152228	0.000271358	3.48413e-05
Alloprevotella sp. oral taxon 914	0.000322563	0.000106564	0.000160849	0.00114343	8.54e-05	0	0	0	0.00026455	0	6.23e-05	7.25e-05	0.000979432	0	5.42e-05	0	0	5.86e-05	0	0	0	0	0	0	9.51e-05	0	0	0	0.000103466	0.00020642	0	0	0	0	0.00177457	0.000124984	0.000445633	0	0	0	0.000151514	0.000165519	0.000144746
Haemophilus paraphrohaemolyticus	0	0	0	0.0010005	0	0	0	0	0	0	0.000373622	0	0	0	0	0	0	0	0	0	0	0	0	0	0	0	0	0	0	0	0	0	0	0	0	0.000249969	0.00430778	0	0	0	0.000148297	6.87061e-05	0.000239882
Acinetobacter baumannii	0	0	0.000562972	0.000214393	0	0.000215169	0	0	0.000727513	0	0	0	0	0	0.00276318	0	0.000285171	5.86e-05	0	0	0	0	0	0	0	0	0	0	0	0	0	0.000837942	0	0	0.000131449	0	0	0	0.000112423	0	0.00014772	0.00024135	5.69376e-05
Prevotella veroralis	0	0	0.000402123	0.000142929	0	0.000537924	0.000296413	0	0.000330688	0	0	0	0.000707368	0	0	0	0	0.00205062	5.69e-05	0	0	0	0	0	0	0	0	0	0	0.000309629	0	0	0.000359509	0.000148644	6.57e-05	0.000124984	0	0.000330415	0	0	0.000146596	0.000226248	7.04674e-05
Prevotella bivia	0	0	0	0	0	0	0	0	0	0	0	0	0	0.0008285	0	0	0.00361217	0.000351535	0	0	0	0	0	0	0	0	0	0	0	0	0	0	0	0	0	0	0	0.00090864	0	0	0.000142521	0.00023961	4.78232e-05
Porphyromonas uenonis	0	0	0	0	0	0	0	0	0	0	0.000871785	0.00340975	0	0.00112439	0	0	0	0.000292946	0	0	0	0	0	0	0	0	0	0	0	0	0	0	0	0	0	0	0	0	0	0	0.000142472	0.000284944	0
Actinomyces sp. oral taxon 175 nov 97.97%	0	0	0	0	0	0	0	0	0	0	0	0	0	0	0	0	0	0	0	0	0	0	0	0	0	0	0	0	0	0	0	0.00569801	0	0	0	0	0	0	0	0	0.00014245	0	0.000299895
Lachnospiraceae [G-2] sp. oral taxon 088 nov 93.15%	0	0.000177607	0	0	0.000341734	0	0	0	0	0	0.000186811	0	0	0	0	0	0	5.86e-05	0	0.00206941	0	0	0	0	0	0	0	8.1e-05	0	0	0	0	0	0	0.00276043	0	0	0	0	0	0.00014189	0.000141708	0.000149549
Haemophilus pittmaniae	0	0	0	0	0	0	0.000197609	0	0.00198413	0	0	0.00232153	0	0	0	0	0	0	0	0	0	0	0	0	0	0	0.000835637	0	0	0	0	0	0	0	0	0	0.000297089	0	0	0	0.0001409	0.000225163	5.96172e-05
Corynebacterium multispecies spp24 2	0	0	0	0.00128636	0	0	0	4.11e-05	0.000132275	0	0	0	0	0.000177536	0	0	0	0	0	0	0	0	0	0	0	0	0	0	0	0.00010321	0	0.00310039	0	0	0	0	0.000148544	0	0.000562114	0	0.000138788	8.18634e-05	0.000206013
Betaproteobacteria [G] sp. Oral Taxon B96	0	0	0	0	0	0	0	0	0	0	0	0	0	0	0	0	0	0	0	0	9.49e-05	0	0	0	0	0	0	0	0	0	0	0.00511145	0	0	0	0	0	0	0.000224845	0	0.00013578	0	0.000280857
Tannerella sp. oral taxon 808	0	3.55e-05	0	0	0	0	0	0	0	0	0	0.000145096	0.00489716	0	0	0	0	0	0.000113766	0	0	0	0	0	0	0	0	0	0	0	0	0	0	0	0	0	0	0	0.000224845	0	0.000135409	0.000259576	1.18339e-05
TM7 [G-6] sp. oral taxon 870 nov 96.82%	0	0	0	0	0.000170867	0	0	0	0	0	0	0	0	0	0	0	0	0	0	0	0.00113841	0	0	0	0	0	0	0.00397051	0.000103466	0	0	0	0	0	0	0	0	0	0	0	0.000134581	8.54335e-06	0.00021442
Treponema pectinovorum	0.000806408	0.00131429	0	0	0.000427168	0	0	0	0	0	0.000498163	0.000507835	0	0	0	0	0	0.00175767	0	0	0	0	0	0	0	0	0	0	0	0	0	0	0	0	6.57e-05	0	0	0	0	0	0.000134431	0.000265577	3.45789e-06
GN02 [G-2] sp. oral taxon 873	0.000268803	0	0	0	0.00170867	0	0	0	0.00185185	0	6.23e-05	0	0	0	0.0005418	0	0	0	0	0	0.000189735	7.35e-05	0	0	0	0.000422	0	0	0	0	8.31e-05	0	0	0	0	0	0	0	0.000112423	0	0.000132855	0.000221671	3.63696e-05
Mollicutes [G-1] sp. oral taxon 504	0	0	0	0	0.00529688	0	0	0	0	0	0	0	0	0	0	0	0	0	0	0	0	0	0	0	0	0	0	0	0	0	0	0	0	0	0	0	0	0	0	0	0.000132422	0.000264844	0
Bacteroides zoogleoformans nov 89.07%	0	0	0	0	0	0	0	0	0.005291	0	0	0	0	0	0	0	0	0	0	0	0	0	0	0	0	0	0	0	0	0	0	0	0	0	0	0	0	0	0	0	0.000132275	0.00026455	0
Pseudomonas pseudoalcaligenes	5.38e-05	0	0.000321699	0.000571714	0	0.000753093	0	0	0.000132275	0	0	0	0	0	0.00016254	0	0	0.000351535	0.000113766	0.000258676	0	0	0	0	0	0	0	0.000243092	0	0	0	0.00226244	0	0	6.57e-05	0	0	0	0	0	0.000132258	0.000135955	0.000135328
Treponema sp. oral taxon 247	0	0	0	0	0	0	0	0	0	0	0	0	0	0	0	0	0	0.000410124	0	0	0	0	0	0	0	0	0	0	0	0	0	0	0	0	0.00486362	0	0	0	0	0	0.000131844	2.05062e-05	0.00025598
Parvimonas sp. oral taxon 110 nov 97.29%	0	0	0	0	0	0	0.00335935	0	0.000462963	0	0.000124541	0	0	0	0	0	0	0	0	0	0	0	0.000256706	0	0	0	0	0	0	0	0	0	0	0	0	0.000812398	0.000148544	0	0	0.000105899	0.00013176	0.000197343	6.96604e-05
Actinomyces sp. oral taxon 169	0	0	0	0	0	0	0.00138326	0	0	0	0	0.000145096	0	0	0.00010836	0	0	0	0	0	0	0	0	4.92e-05	0	0	0	0	0	0.00020642	0	0.00234624	0	0	0.000788695	0	0	0	0.000224845	0	0.000131303	8.1836e-05	0.000190284
Streptobacillus hongkongensis	0.000430084	0	0.00193019	0	0.000939769	0	0	0	0.00119048	0	0	7.25e-05	0	0	0	0	0	0	0.000682594	0	0	0	0	0	0	0	0	0	0	0	0	0	0	0	0	0	0	0	0	0	0.00013114	0.000262281	0
Lachnospiraceae [G-8] sp. oral taxon 500	0	7.1e-05	0	0	0.000341734	0	0	0	0.000396825	0	0.00161903	0.000145096	0	0	0	0	0	0.000527303	0	0	0	0	0	0	0	0	0	8.1e-05	0	0	0	0	0	0	0.00144594	0	7.43e-05	0.000165207	0.000337268	0	0.000130118	0.000155049	0.000110722
Treponema socranskii	0	7.1e-05	0	0	0.00187954	0	0	0	0.000198413	0	6.23e-05	0.000362739	0.000217652	0	5.42e-05	0	0	0.000527303	0	0	0	0	0	0	0.000285252	7.03e-05	0	0	0	0	0	0	0	0.000222965	0.00124877	0	0	0	0	0	0.000130011	0.000168657	9.61729e-05
Bacteroidetes [G-5] sp. oral taxon 505 nov 97.11%	0	0	0	0	0	0	0	0	0	0	0	0	0	0	0	0	0	0	0	0	0	0	0	0	0	0	0	0	0	0	0	0	0	0	0.00519224	0	0	0	0	0	0.000129806	0	0.000273276
Cardiobacterium hominis	0	0	0	0	0	0	0	0.000246488	6.61e-05	0	0	0	0	0	0.00021672	0	0	0	0	0	0	0	0	0	9.51e-05	0.00267267	0	0	0	0	0	0	0.000873093	7.43e-05	0.000197174	0	0	0	0.000674536	0	0.000127904	2.64654e-05	0.000241414
Leptotrichia sp. oral taxon 223	0	0	0.000884671	0	0	0	0	0	0	0	0.000435893	0.00174115	0.00163239	0	0	0	0	0	0	0	0	0	0	0	0	7.03e-05	0	0	0	0	0	0	0	0	0	6.25e-05	0	0.000247811	0	0	0.000126868	0.000234705	2.00322e-05
Peptostreptococcaceae [XI][G-9] [Eubacterium] brachy	0.00107521	0	0	0	8.54e-05	0.000645508	0	0	0	0	6.23e-05	0.000290192	0	0	0	0	0	0	0	0	0	0	0	0	0	0	6.43e-05	0.000324123	0	0	0	0	0	7.43e-05	0.00243181	0	0	0	0	0	0.000126329	0.000107931	0.000152344
TM7 [G-4] sp. oral taxon 355	0	0	0	0	0	0	0	0	0	0	0	0	0	0	0.00498456	0	0	0	0	0	0	0	0	0	0	0	0	0	0	0	0	0	0	0	0	0	0	0	0	0	0.000124614	0.000249228	0
Prevotella denticola	0.000215042	0	8.04e-05	0	0.000512601	0	0	0.000287569	0.000793651	0	0	0	0.00038089	0	0	0	0	0	0	0	0	0	0.000128353	4.92e-05	0	7.03e-05	6.43e-05	8.1e-05	0	0	0	0	5.14e-05	0.00156076	0	0.000187477	0	0.000413018	0	0.000105899	0.000124546	0.000113508	0.000142721
Atopobium rimae	0	7.1e-05	0	0	0	0	0	0	0.00026455	0	0.000124541	0.00108822	0.00136032	0	0.00043344	0	0	0	0.000113766	0	0	0	0	0	0	0	0	0.000162061	0	0	0	0	5.14e-05	0.000520253	0.000131449	0	0	0.000165207	0	0.000423594	0.000122745	0.000172792	7.65244e-05
Aggregatibacter sp. oral taxon 898 nov 97.96%	0	0	0	0	0	0	0	0	0	0	0	0	0	0	0.0048762	0	0	0	0	0	0	0	0	0	0	0	0	0	0	0	0	0	0	0	0	0	0	0	0	0	0.000121905	0.00024381	0
Neisseria oralis	0	0	0	0	0	0	0	0	0	0	0	0	0	0	0	0	0	0	0	0	0	0	0	0	0.000665589	0.000211	0	8.1e-05	0.000310398	0	0	0	0	0.000222965	0	0	0	0	0.00337268	0	0.000121591	0	0.000255981
Treponema sp. oral taxon 260	0	0	0	0	0.00452798	0	0	0	0	0	0	0	0	0	0	0	0	0.000175768	0	0	0	0	0	0	0	0	0	0	0	0	0	0	0	0	0	0	0	0	0	0	0.000117594	0.000235187	0
TM7 [G-1] sp. oral taxon 352	0	0	0	0	0	0	0.000790436	4.11e-05	0.000132275	0	0	0.000362739	0	0	0.00016254	0	0	0.000234357	5.69e-05	0	9.49e-05	0	0.00102683	0	0	0	0	0	0.000310398	0	8.31e-05	0	0	0	6.57e-05	0	0.000222816	0	0	0.00105898	0.000116077	8.90173e-05	0.000145675
Bacteroides heparinolyticus	0	0	0	0	0.000512601	0	0	0	0.000396825	0	0	0	0	5.92e-05	0	0	0	0.00351535	0	0	0	0	0	0	9.51e-05	0	0	0	0	0	0	0	0	0	0	0	0	0	0	0	0.000114477	0.000224199	5.00526e-06
Alphaproteobacteria [G] sp. Oral Taxon A28 nov 84.07%	0	0	0	0	0.000256301	0	0	0	0.00152116	0	0	0	0	0	0	0	0	0.00275369	0	0	0	0	0	0	0	0	0	0	0	0	0	0	0	0	0	0	0	0	0	0	0.000113279	0.000226558	0
Prevotella sp. oral taxon 305 nov 94.13%	0	0	0	0.000357322	0	0	0.000197609	0	0	0	0	0	0	0	0	0	0.00218631	0.000175768	0	0	0	0	0	0	9.51e-05	0	0	0	0	0	0	0	0	0.000594575	0	0	0.000594177	0	0	0.000317696	0.000112964	0.000145851	8.4292e-05
Alloprevotella sp. oral taxon 913	0	0	0	0	0	0	0.000296413	0	6.61e-05	0	0.000124541	0	0	0	0.00010836	0	0	0.000761659	0	0.00198319	0	0	0	0	0.000855757	0	0	0	0	0	0	0	0	0	0	6.25e-05	0	0	0.000224845	0	0.000112084	0.000167013	6.01633e-05
Treponema sp. oral taxon 951	0	0	0	0	0	0	0	0	0.00112434	0	0	0	0	0	0	0	0	0.0021678	0	0	0	0	0	0	0	0	0	0	0	0	0	0	0	0	0.000920145	0	0	8.26e-05	0.000112423	0	0.000110183	0.000164607	5.86931e-05
Oribacterium asaccharolyticum	0	0	0	0.000357322	0	0	0	0	0	0	0	0.000362739	0	0	0	0	0	0.000351535	0	0	0	0.000147016	0.000256706	4.92e-05	0	0	0	0	0.000103466	0.00010321	0	0	0	0.000148644	6.57e-05	0.000124984	0.000297089	0.000330415	0	0.00169438	0.00010981	5.35798e-05	0.000174779
Peptostreptococcaceae [XI][G-7] [Eubacterium] yurii subsps. yurii & margaretiae nov 90.91%	0	0	0	0	0	0	0	0	0	0	0.00311352	0.000652931	0.000544129	0	0	0	0	0	0	0	0	0	0	0	0	0	0	0	0	0	0	0	0	0	0	0	0	0	0	0	0.000107764	0.000215529	0
Actinomyces sp. oral taxon 175	0	3.55e-05	0	0	0	0	0	0	6.61e-05	0	0	0	0	0	5.42e-05	0	0	0	5.69e-05	0	0	0	0	0	0.000285252	0.000211	0.000192839	0	0	0.00216741	0	0.000251383	5.14e-05	0	0.000657246	0	0	8.26e-05	0.000112423	0	0.000105606	1.0635e-05	0.000211134
Alloprevotella sp. oral taxon 473 nov 97.57%	0.000215042	0	0.000160849	0	0	0	0	0	0.000462963	0	0.000498163	0	0	0	0.00021672	0	0	0	0	0	0	0	0	0	0	0	0	0	0.000413864	0.00020642	0	0	0	0	0.00124877	0.00056243	0.000222816	0	0	0	0.000105201	7.76868e-05	0.0001397
Delftia acidovorans	0.000161282	0	0	0.00107197	0	0	0.00128446	0.000164325	0	0	0	7.25e-05	0	0	0	7.24e-05	0.000570342	5.86e-05	0	0	0	7.35e-05	0	0	0	0	0	8.1e-05	0	0	0	0.000502765	0	0	0	0	7.43e-05	0	0	0	0.000104686	0.000172794	3.85034e-05
Bacteroides zoogleoformans nov 89.25%	0	0	0	0	0	0	0	0	0.00416667	0	0	0	0	0	0	0	0	0	0	0	0	0	0	0	0	0	0	0	0	0	0	0	0	0	0	0	0	0	0	0	0.000104167	0.000208333	0
Capnocytophaga multispecies spp1 2	0	0	0	0	0	0	0	0.000534056	0	0	0	0	0	0	0	0	0	0	0	0	0	0	0	0	0	0.00330567	0	0	0	0	0	0	5.14e-05	0	0	0	0.000148544	0	0	0	0.000100992	2.67028e-05	0.000184506
Tatumella ptyseos	0	0	0	0	0	0	0	0	0	0.0039864	0	0	0	0	0	0	0	0	0	0	0	0	0	0	0	0	0	0	0	0	0	0	0	0	0	0	0	0	0	0	9.966e-05	0.00019932	0
Stenotrophomonas maltophilia	0	0	0	0	0	0	0.00237131	0	0.00119048	0	0	0	0	0	5.42e-05	7.24e-05	0	5.86e-05	0	4.31e-05	0	0	0	0	0	0	0	0	0	0	0	0.000167588	0	0	0	0	0	0	0	0	9.89418e-05	0.000189504	8.82042e-06
Corynebacterium durum	0	0	0	0	0	0	0	0	0	0	0	0	0	0	0.00010836	0	0	0	0	0	0	0.000220523	0	0	9.51e-05	0.000562667	0	8.1e-05	0	0.000516049	0	0	5.14e-05	0	0	0	0	0	0.00224845	0	9.70888e-05	5.418e-06	0.000198694
Capnocytophaga gingivalis nov 96.25%	0	0	0	0	0	0	0	0.000739463	0.000132275	0	0.000186811	7.25e-05	0	0	0	0	0	0	5.69e-05	0	0	0	0	0	0	0.000140667	0	8.1e-05	0	0.000309629	0.00116347	0	0	0	0	0.000187477	0	0	0.000786959	0	9.64287e-05	5.93974e-05	0.000140484
Prevotella sp. oral taxon 306 nov 97.96%	0	0	0	0	0	0	0	0	0	0	0	0	0	0	0	0	0	0	0	0	0	0	0	0	0	0	0	0	0	0	0	0	0	0.00364177	0	0	0	0	0	0.000211797	9.63391e-05	0	0.000202819
Prevotella maculosa	0.000268803	0	0.000160849	0	0	0	0.000790436	8.22e-05	0	0	6.23e-05	0.000217644	0	0	0	0	0	0.000585892	5.69e-05	0	0	0	0	0	0.000190168	7.03e-05	0	0.000243092	0	0	0	0	0.000924452	0	0	6.25e-05	0	8.26e-05	0	0	9.49534e-05	0.000111251	8.27954e-05
Arcobacter butzleri	0	0	0	0	0	0	0	0	0.00376984	0	0	0	0	0	0	0	0	0	0	0	0	0	0	0	0	0	0	0	0	0	0	0	0	0	0	0	0	0	0	0	9.4246e-05	0.000188492	0
Lachnospiraceae [G] sp. Oral Taxon G33	0	0	0	0	0.0012815	0	0	0	0	0	0	0	0	0	0	0	0	0	0	0	0	0	0	0	0	0	0	0.000162061	0	0	0	0	0	0	0.00230036	0	0	0	0	0	9.35981e-05	6.40752e-05	0.000129601
Porphyromonas catoniae nov 97.76%	0	0	0	0	0	0.00215169	0	0	0	0	0	0	0	0	0	0	0	0	0.000739477	0	0	0	0	0	9.51e-05	0	0	0	0	0.000722469	0	0	0	0	0	0	0	0	0	0	9.27185e-05	0.000144559	4.30299e-05
Microbacterium flavescens nov 87.63%	0	0	0	0	0	0	0	0	0	0	0	0	0	0	0	0	0	0	0	4.31e-05	0	0	0	0	0	0	0.000449958	0	0.000310398	0	0.00016621	0	0	0.0017094	0	6.25e-05	0	0.000495622	0	0.000423594	9.15196e-05	2.155e-06	0.000190404
Streptococcus sp. oral taxon 057	0	0	0.000160849	0	0	0	0	0	0	0	0.000124541	0	0	0	0	0	0	0	0	0	0	0	0.00141189	0.000246245	0	0	0	0	0.000103466	0	0	0	0	0.00081754	0	0.000124984	0	0.000660829	0	0	9.12585e-05	1.42695e-05	0.000177103
Paracoccus marcusii Oral Taxon D41	0	0	0	0	0	0	0	0	0	0	0	0	0	0	0	0	0	0	0	0	0	0.00169068	0	0	0	0	0	0	0	0	0	0.00192727	0	0	0	0	0	0	0	0	9.04487e-05	0	0.000190418
Treponema sp. oral taxon 234	0	0	0	0	0	0	0	0	0	0	0.00267763	0.000217644	0	0	0	0	0	0	0	4.31e-05	0	0	0	0	0	0	0	0	0	0	0	0	0	0	0.000525797	0	0	0	0.000112423	0	8.94147e-05	0.000146918	3.35905e-05
Ruminococcaceae [G-1] sp. oral taxon 075 nov 91.53%	0	0	0	0	0	0	0	0	0	0	0	0	0	0	0	0	0	0	0	0	0	0.000882094	0	0	0	0	0	0.000162061	0.000310398	0	0	0	0	0	0.000197174	0.000249969	0.00170826	0	0	0	8.77489e-05	0	0.000184734
Fusobacterium sp. oral taxon 370 nov 97.59%	0	0	0	0	0	0	0	0	0.00145503	0	0	0	0	0	0	0	0	0.00205062	0	0	0	0	0	0	0	0	0	0	0	0	0	0	0	0	0	0	0	0	0	0	8.76412e-05	0.000175282	0
Peptostreptococcaceae [XI][G-2] sp. oral taxon 091	5.38e-05	0.000639386	0	0	0.000598035	0.000322754	0	0	0	0	0	0	0	0	0.0005418	0	0	0.000761659	0.000455063	0	0	0	0	0	0	0	0	0	0	0	0	0	0	0	0.000131449	0	0	0	0	0	8.75987e-05	0.000168625	6.91837e-06
Shuttleworthia satelles	0	3.55e-05	0	0	0	0	0	0	0.00244709	0	0.000186811	0	0	0	0	0	0	0.000585892	0.000113766	0	0	0	0	0	0	0	0	8.1e-05	0	0	0	0	0	0	0	0	0	0	0	0	8.62515e-05	0.000168453	4.26316e-06
Prevotella sp. oral taxon 304	0	0	0	0	0	0	0	0	0.000396825	0	0	0	0	0	0	0	9.51e-05	0.000410124	0	0	0	0	0	0	0	0	6.43e-05	0.000972369	0	0	0	0	0	0	0.000525797	0.000124984	0	0.000743433	0.000112423	0	8.61339e-05	4.51025e-05	0.000133858
Leptotrichia multispecies spp23 2	0	0	0	0	0	0	0	0	0	0	0	0	0	0	0	0	0	0.00339817	0	0	0	0	0	0	0	0	0	0	0	0	0	0	0	0	0	0	0	0	0	0	8.49543e-05	0.000169909	0
Treponema sp. oral taxon 249	0	0	0	0	0	0	0	0	0	0	0	0	0	0	0.00037926	0	0	0.00292946	0	0	0	0	0	0	0	0	0	0	0	0	0	0	0	0	6.57e-05	0	0	0	0	0	8.43605e-05	0.000165436	3.45789e-06
Moraxella osloensis	0	0	0	0	0	0	0	0	0	0	0	0	0	0	0	0	0	0.00070307	0	0	0	0	0	0	0	0	0	8.1e-05	0	0	0	0.00251383	0	0	0	0	7.43e-05	0	0	0	8.43049e-05	3.51535e-05	0.00014048
Porphyrobacter tepidarius nov 94.93%	0	0	0	0	0	0	0	0	0	0	0	0	0	0	0	0	0	0	0	0	0	0	0	0	0	0	0	0	0	0	0	0.00335177	0	0	0	0	0	0	0	0	8.37942e-05	0	0.000176409
Sphingomonas sp. oral taxon 004 nov 94.94%	0	0	0	0	0	0	0	0	0	0	0	0	0	0	0	0	0	0	0	0	0	0	0	0	0	0	0	0	0	0	0	0.00335177	0	0	0	0	0	0	0	0	8.37942e-05	0	0.000176409
Campylobacter rectus	0.000376324	3.55e-05	0	0	0	0	0	0	0.000595238	0	0	0	0	0	0	0	0	0.0010546	0	0	0	0	0	0	0	0	0	0.000243092	0	0	0	0	0	0.000148644	0.000657246	0	0	8.26e-05	0.000112423	0	8.26418e-05	0.000103083	6.54739e-05
Bacteroidetes [G-3] sp. oral taxon 280	0	0.00024865	8.04e-05	0	0	0	0	0	0	0	0.000311352	0	0	0	0	0	0	0.000527303	0	0	0	0	0	0	0	0	0	0	0	0	0	0	0	0	0.00157739	0	0	0.000165207	0.000337268	0	8.11893e-05	5.83853e-05	0.000109467
Haemophilus multispecies spp39 2	0	0	0	0	0	0	0	0	0	0	0	0	0	0	0	0	0	0	0	0	0	0.00316083	0	0	0	0	0	0	0	0	0	0	0	0	0	0	0	0	0	0	7.90209e-05	0	0.00016636
Parvimonas sp. oral taxon 110	0.000215042	0	0	0	0	0	0.000197609	0	0.000198413	0	0	0	0	0	0	0	0	0.00240216	0	0	0	0	0	0	0	0	0	0	0	0	0	0	0	0	6.57e-05	0	0	0	0	0	7.6973e-05	0.000150661	3.45789e-06
Treponema sp. oral taxon 234 nov 87.05%	0	0	0	0	0	0	0	0	0	0	0.00249081	0.000362739	0	0	0	0	0	5.86e-05	0	0	0	0	0	0	0	0	0	0	0	0	0	0	0	0	0	0	0.000148544	0	0	0	7.65174e-05	0.000145608	7.81811e-06
Pseudomonas gingeri	0.000268803	0	0.000482548	0	0	0	0	0	0	0	0	0.000145096	0.00108826	0	0	0.000289457	0	0	0	0	0.000189735	0	0	0	0	0	0	0.000324123	0	0	0	0	0	0	0.000197174	0	0	0	0	0	7.46298e-05	0.000113708	2.74367e-05
Schlegelella aquatica	0	0	0	0	0	0	0	0	0	0	0	0	0	0	0	0	0	0	0	0	0	0	0	0	0	0	0	0	0	0	0	0.002849	0	0	0	0	0	0	0.000112423	0	7.40356e-05	0	0.000155865
Sphingobium yanoikuyae	0	0	0	0	0	0	0	0	0	0	0	0	0	0	0	0	0	0	0	0	0	0	0	0	0	0	0	0	0	0	0	0.0029328	0	0	0	0	0	0	0	0	7.33199e-05	0	0.000154358
Calycanthus floridus Oral Taxon D07	0	0	0	0	0	0	0	0	0	0	0	0	0	0	0	0	0	0	0	0	0	0	0	0	0	0	0	8.1e-05	0	0	0	0.002849	0	0	0	0	0	0	0	0	7.32501e-05	0	0.000154211
Streptococcus sp. oral taxon 064 nov 97.98%	0	0	0	0	0	0	0.000494022	0	0	0	0	0	0	0	0	0	0	0	0	0	0	0	0	0	0	0	0	0	0	0.00227062	0	0	0	0	0	0.000124984	0	0	0	0	7.22405e-05	2.47011e-05	0.000126084
Lachnospiraceae [G] sp. Oral Taxon B18	0	0	0	0	0	0	0	0	0	0	0.000124541	0	0	0	0	0	0	0.00275369	0	0	0	0	0	0	0	0	0	0	0	0	0	0	0	0	0	0	0	0	0	0	7.19558e-05	0.000143912	0
Leptotrichia sp. oral taxon 219 nov 88.65%	0	0	0	0	0	0	0	0	0	0	0	0.000362739	0	0	0	0	0	0	0	0	0	0	0	0	0	0	0	0	0	0	0	0	0	0.0010405	0	0.000187477	0	0.000330415	0	0.000953087	7.18556e-05	1.81369e-05	0.000132183
Micrococcus luteus	0	0	0	0	0	0.000860678	9.88e-05	0.00119136	0	0	0	0	0	0.000118357	0	7.24e-05	0	0.000234357	0	8.62e-05	0	0	0	0	0	0	0	8.1e-05	0	0.00010321	0	0	0	0	0	0	0	0	0	0	7.1159e-05	0.000133107	9.69526e-06
Streptococcus pneumoniae	0	0	0	0	0.000854336	0	0	0	0	0	0	0	0	0	0	0	0.00171103	0	0	0	0	7.35e-05	0	0	9.51e-05	0	0	8.1e-05	0	0	0	0	0	0	0	0	0	0	0	0	7.03741e-05	0.000128268	1.31368e-05
Selenomonas sp. oral taxon 442	0	0	0	0	0.000256301	0	0	0	0	0	0	0	0	0	0	0	0	0.00169909	0	0	0	0	0	0	0	0	0	0	0	0	0	0	0	0	0.00085442	0	0	0	0	0	7.02452e-05	9.77694e-05	4.49695e-05
Bacteroides thetaiotaomicron	0	0	0	0	0	0	0	0	0.00251323	0	0	0	0	0	0	0	0	0.000292946	0	0	0	0	0	0	0	0	0	0	0	0	0	0	0	0	0	0	0	0	0	0	7.01544e-05	0.000140309	0
Fretibacterium sp. oral taxon 361	0	0	0	0	0	0	0	0	0.000595238	0	0	0	0	0	0	0	0	0	0	0	0	0	0	0	0	0	0	0	0	0	0	0	0	0	0.00151167	0	0	0	0.000674536	0	6.9536e-05	2.97619e-05	0.000115063
Porphyromonas sp. oral taxon 284 nov 97.76%	0.000430084	0	0	0	0	0	0	0	0.000132275	0	0	0	0.00201328	0	0	0	0	0	0	0	0	0	0	0	0.000190168	0	0	0	0	0	0	0	0	0	0	0	0	0	0	0	6.91451e-05	0.000128782	1.00088e-05
Atopobium sp. oral taxon 810	0	0	0	0	0	0	0	0	0	0	0	0	0	0	0	0	0	0.00275369	0	0	0	0	0	0	0	0	0	0	0	0	0	0	0	0	0	0	0	0	0	0	6.88423e-05	0.000137685	0
Bradyrhizobium multispecies spp27 2	0	0.000142086	0	0	0	0	0	0.00258812	0	0	0	0	0	0	0	0	0	0	0	0	0	0	0	0	0	0	0	0	0	0	0	0	0	0	0	0	0	0	0	0	6.82551e-05	0.00013651	0
Kingella sp. Oral Taxon C21	0	0	0	0	0	0	0.00256892	0	0	0	0	0	0	0	0	0	0	0	0	0	0	0	0	0	0	0	0	0	0	0	0	0	0	7.43e-05	0	0	0	0	0	0	6.60804e-05	0.000128446	3.91053e-06
Capnocytophaga sp. oral taxon 878	0	0	0	0	0	0	0	0	0.00251323	0	0	0	0	0	0	0	0	0	0	0	0	0	0	0	0	0	0	0	0	0	8.31e-05	0	0	0	0	0	0	0	0	0	6.49082e-05	0.000125661	4.37368e-06
Tannerella forsythia	0.000322563	0.000106564	0	0	0	0	0	0	0	0	0	0	0	0	0	0	0	0	0	0	0	0	0	0	0	0	0	0	0	0.00010321	0	0.000502765	0	0.000222965	0.00124877	0	0	8.26e-05	0	0	6.47359e-05	2.14563e-05	0.0001137
Prevotella sp. oral taxon 526	0	0.0004973	0	0	0	0	0	0	6.61e-05	0	0	0	0	0	0	0	0	0.000234357	0	0	0	0	0	0	0	0	0	8.1e-05	0	0	0	0	0	0	0.00118304	0	0	0.000413018	0.000112423	0	6.4681e-05	3.98879e-05	9.41834e-05
Dialister invisus	0	0	0	0	0	0	0	4.11e-05	0.00026455	0	0	0	0	0	0	0	0.00190114	0.000292946	0	0	0	0	0	0	0	0	0	0	0	0	0	0	0	0	6.57e-05	0	0	0	0	0	6.41359e-05	0.000124987	3.45789e-06
Afipia broomeae	0	0	0	0	0	0	0	0.000903788	0	0	0	7.25e-05	0.00157797	0	0	0	0	0	0	0	0	0	0	0	0	0	0	0	0	0	0	0	0	0	0	0	0	0	0	0	6.38565e-05	0.000127713	0
Treponema sp. oral taxon 262	0	0	0	0	0	0	0	0	0	0	0.000934056	0	0	0	0	0	0.000380228	0.000117178	5.69e-05	0	0	0	0	0	0	0	0	0	0	0	0	0	0.000154075	7.43e-05	0.000131449	0	0	0	0.000674536	0	6.3068e-05	7.44181e-05	5.444e-05
Clostridiales [F-1][G-2] sp. oral taxon 402	0	0	0	0	0	0	0	0	0	0	0	0	0	0	0	0	0	0.00251933	0	0	0	0	0	0	0	0	0	0	0	0	0	0	0	0	0	0	0	0	0	0	6.29834e-05	0.000125967	0
Betaproteobacteria [G] sp. Oral Taxon C83	0	0	0	0	0	0	0	0	0	0	0	0	0	0	0	0	0.00247148	0	0	0	0	0	0	0	0	0	0	0	0	0	0	0	0	0	0	0	0	0	0	0	6.17871e-05	0.000123574	0
Alloprevotella sp. oral taxon 912	0	0	0	0	0	0	0.00088924	0	0	0	0.000124541	0	0	0	0.00048762	0	0	5.86e-05	0	0.000646691	0	0	0	0	0	0	0	0	0	0	0	0	0.000256792	0	0	0	0	0	0	0	6.15871e-05	0.000110335	1.35154e-05
Escherichia coli nov 94.50%	0	0	0	0	0	0	0	0	0	0.00246219	0	0	0	0	0	0	0	0	0	0	0	0	0	0	0	0	0	0	0	0	0	0	0	0	0	0	0	0	0	0	6.15547e-05	0.000123109	0
Selenomonas dianae	0	0.000426257	0	0	0.000341734	0	0	0	0.000661376	0	0.000435893	0	0	0	0	0	0	0	0	0	0	0	0	0	0	0	0	0	0	0	0	0	0.000205434	0	0.000262898	0	0	0	0	0.000105899	6.09873e-05	9.3263e-05	3.02227e-05
Streptococcus intermedius	0	0	0	0	0	0	0	0	0	0	0	7.25e-05	0	0	0	0	0	0	0	0	0	0	0	0	0	0	0	0	0	0.00227062	0	0	0	0	0	0	0	8.26e-05	0	0	6.06429e-05	3.625e-06	0.000123853
Capnocytophaga sp. oral taxon 380	0	0	0	0	0	0	0	0	0	0	0	0	0	0	0	0	0	0	0	0	0	0	0	0	0	0	0	0	0	0	0	0	0.00225977	0.000148644	0	0	0	0	0	0	6.02104e-05	0	0.000126759
Fusobacterium naviforme	0	0	0	0	8.54e-05	0	0	0	0	0	0	0	0	0	0	0	0	0	0.00227531	0	0	0	0	0	0	0	0	0	0	0	0	0	0	0	0	0	0	0	0	0	5.90178e-05	0.000118036	0
Sphingomonas sp. Oral Taxon A74	0	0	0	0	0	0	0	0	0	0	0	0	0	0	0	0	0	0	0	0	0	0	0	0	0	0	0	0	0	0	0	0.00234624	0	0	0	0	0	0	0	0	5.86559e-05	0	0.000123486
Porphyromonas sp. oral taxon 284	0	0	0	0	0	0	9.88e-05	0.000616219	0.000132275	0	0	0	0	0	0	0	0	0	0	0	0	0	0	0	0	0	0	0	0	0	0	0	0.00143804	0	0	0	0	0	0	0	5.71333e-05	4.23647e-05	7.56861e-05
Leptotrichia sp. oral taxon 417 nov 97.84%	0	0	0.000241274	0	0	0	0	0	0	0	0.000124541	0	0	0	0	0	0	0	0	0	0	0	0	0	0	0	0	0	0	0	0	0	0.0012326	0	0	0	0	0.000660829	0	0	5.64812e-05	1.82908e-05	9.96543e-05
Tannerella sp. oral taxon 916	0	0	0	0	0	0	0	0	0.000529101	0	0.000186811	0	0	0	0.00097524	0	0	0	0	0	0	0	0	0	0	0	0	0	0	0	0	0	0	0	0.000460072	0	0	8.26e-05	0	0	5.58456e-05	8.45576e-05	2.85617e-05
Kingella oralis	0	0	0.000562972	0	0	0	0	0	0	0	0	0	0	0.000177536	0	0	0.000190114	0	0	0	0	0	0	0	0	0.000281334	0	0	0	0	0	0	0.000513584	0	0	0	0	0.000495622	0	0	5.5529e-05	4.65311e-05	6.79232e-05
Peptostreptococcaceae [XI][G-1] [Eubacterium] infirmum	0	3.55e-05	0	0	0	0	0	0	0.000198413	0	0	0.000217644	0.000217652	0	0	0	9.51e-05	0.00117178	5.69e-05	0	0	0	0	0	0	0	0	0	0	0	0	0	0	0	0	0	0	0	0.000224845	0	5.54459e-05	9.96496e-05	1.18339e-05
Enterococcus avium	0	0	0	0	0	0	0	0	0	0	0	0	0	0.00118357	0	7.24e-05	0.00095057	0	0	0	0	0	0	0	0	0	0	0	0	0	0	0	0	0	0	0	0	0	0	0	5.51635e-05	0.000110327	0
Peptostreptococcaceae [XI][G-5] [Eubacterium] saphenum	0	0	0	0	0	0	0	0	6.61e-05	0	6.23e-05	0	0	0	0	0	9.51e-05	0	0	0	0	0	0	0	0	0	0	0	0	0	0	0	0	7.43e-05	0.00164311	0	0	0	0.000224845	0	5.4144e-05	1.1175e-05	0.000102224
Streptococcus mutans	0	0	0.000160849	0	0	0	0.00167968	0	0	0	0	0	0	0	0	0	0	0	0	0	0	0	0	0	0	0	0	0	0	0	0	8.38e-05	0	0.000148644	0	0	0	8.26e-05	0	0	5.38892e-05	9.20262e-05	1.65813e-05
Actinomycetales [G] sp. Oral Taxon C05	0	0	0	0	0	0	0	0	0	0	0	0	0	0	0	0	0	0	0	0	0	7.35e-05	0	0	0	0	0	0	0	0	0	0.00184347	0	0	0	0	0.000222816	0	0	0	5.34947e-05	0	0.00011262
Prevotella marshii	0	0	0	0	0	0	0.00138326	0	0	0	0	0	0	0	0	0	0	0	0	0	0	0	0	0	0	0	0	0	0	0	0	0	0	0	6.57e-05	0.000124984	0	0	0.000562114	0	5.34015e-05	6.91631e-05	3.96209e-05
Oribacterium multispecies spp18 2	0	0	0	0	0	0	0.000494022	0	0	0	0	0.000145096	0	0	0	0	0	0.000117178	5.69e-05	8.62e-05	0	0	0.000128353	4.92e-05	0	0	0	0	0.000620797	0	0	0	0	0	0	0	0	0	0	0.000423594	5.30335e-05	4.49698e-05	6.43128e-05
Leptotrichia sp. oral taxon 215 nov 97.62%	0	0	0	0	0	0	0	0	0.000462963	0	0.000124541	0	0	0	0	0	0	0	0	0	0	0	0	0	0	0	0	0	0	0	0	0	0.000154075	0	0	0	0.000742721	0	0	0.000635391	5.29923e-05	2.93752e-05	8.06414e-05
Prevotella micans	0	3.55e-05	0	0	0	0	0	0	0	0	0.000622704	0	0	0	0	0	0	0	0	0	0	0	0	0	0.000570505	0.000492334	0	0	0	0.00010321	0	0	0.000256792	0	0	0	0	0	0	0	5.20261e-05	3.29102e-05	7.48864e-05
Morganella morganii	0	0	0	0	0	0	0	0	0	0	0	0	0	0.000177536	0	0.00188147	0	0	0	0	0	0	0	0	0	0	0	0	0	0	0	0	0	0	0	0	0	0	0	0	5.14751e-05	0.00010295	0
Granulicatella elegans nov 96.81%	0	0	0	0	0	0	0	0	0	0	0	0	0	0	0	0	0	0	0	0	0.00199222	0	0	0	0	0	0	0	0	0	0	0	0	0	0	0	0	0	0	0	4.98055e-05	0	0
Lachnoanaerobaculum orale nov 88.98%	0	0	0	0	0	0	0	0	0	0	0	0	0	0	0	0	0	0.00199203	0	0	0	0	0	0	0	0	0	0	0	0	0	0	0	0	0	0	0	0	0	0	4.98008e-05	9.96016e-05	0
Burkholderia cepacia	0	0.0004973	0	0	0	0	0	0.00147893	0	0	0	0	0	0	0	0	0	0	0	0	0	0	0	0	0	0	0	0	0	0	0	0	0	0	0	0	0	0	0	0	4.94056e-05	9.88112e-05	0
Treponema maltophilum	0	0	0	0	8.54e-05	0	0	0	6.61e-05	0	6.23e-05	0.000507835	0	0	0.00032508	0	0	0.000175768	0	0	0	0	0	0	0.000285252	0	0	0	0	0	0	0	0	0	0.000460072	0	0	0	0	0	4.91952e-05	6.11241e-05	3.92276e-05
Haemophilus parainfluenzae nov 97.14%	0	0	0	0	0	0	0	0	0	0	0	0	0	0	0	0	0	0	0	0	0	0	0.000256706	0.000246245	0	0	0.000449958	0	0.000103466	0	0	0	0	7.43e-05	0	0.000187477	0	0.000330415	0	0.000317696	4.91566e-05	0	0.000103488
Sphingopyxis alaskensis	0	0.000319693	0	0	0	0	0	0.00164325	0	0	0	0	0	0	0	0	0	0	0	0	0	0	0	0	0	0	0	0	0	0	0	0	0	0	0	0	0	0	0	0	4.90736e-05	9.81472e-05	0
Meiothermus timidus	0	0	0.000804246	0	0	0.000645508	0	0	0.000330688	0	0	0	0	0.000177536	0	0	0	0	0	0	0	0	0	0	0	0	0	0	0	0	0	0	0	0	0	0	0	0	0	0	4.89494e-05	9.78989e-05	0
Proteus mirabilis nov 94.55%	0	0	0	0	0	0	0	0	0	0	0	0	0	0	0	0.00195383	0	0	0	0	0	0	0	0	0	0	0	0	0	0	0	0	0	0	0	0	0	0	0	0	4.88458e-05	9.76916e-05	0
Mycoplasma orale	0	0	0	0.000142929	0	0	0	0	0	0	0	0	0	0	0	0	0.00180608	0	0	0	0	0	0	0	0	0	0	0	0	0	0	0	0	0	0	0	0	0	0	0	4.87253e-05	9.74506e-05	0
Lachnospiraceae [G-2] sp. oral taxon 096	0	0	0.000643397	0	0	0	0	0	0	0	0	0	0	0	0	0	0	0.0010546	0	0	0	0	0	0	0	0	0	0	0	0.00010321	0	0	0	7.43e-05	0	6.25e-05	0	0	0	0	4.84503e-05	8.49001e-05	1.26321e-05
Gemella haemolysans nov 96.22%	0	0	0	0	0	0	0	0	0	0	0	0	0	0	0	0	0	0	0	8.62e-05	0.00123328	0.000514555	0	0	0	0	0	0	0	0.00010321	0	0	0	0	0	0	0	0	0	0	4.84311e-05	4.31e-06	3.25139e-05
Stenotrophomonas sp. Oral Taxon A24	0.000215042	0	0	0	0	0	0	0	0	0	0	0	0	0	0	0	0	0	0	0	0	0	0	0	0	0	0	0	0	0	0	0.0015083	0	0	0	0	7.43e-05	0	0.000112423	0	4.77515e-05	1.07521e-05	8.92115e-05
Cardiobacterium hominis nov 97.73%	0	0	0	0	0	0	0	0.000164325	0	0	0	0	0	0	0	0	0	0	0	0	0	0	0	0	0.00152135	0.000211	0	0	0	0	0	0	0	0	0	0	0	0	0	0	4.74168e-05	8.21625e-06	9.11761e-05
Actinomyces oris	0	0	0	0	0	0	0	0	0	0	0	0.000145096	0	0	0	0	0	0	0	0	0	0	0	0	0	7.03e-05	0	0	0	0.000619259	0	0	0	0	0.00105159	0	0	0	0	0	4.71562e-05	7.2548e-06	9.16396e-05
Rothia mucilaginosa nov 87.65%	0	0	0	0	0	0	0	0	0	0	0	0	0	0	0	0	0	0	0	0	0	0	0	0	0	0	0.00186411	0	0	0	0	0	0	0	0	0	0	0	0	0	4.66028e-05	0	9.81112e-05
Acinetobacter sp. Oral Taxon A58	5.38e-05	0	0	0	0	0.000860678	0.000790436	0	0	0	0	7.25e-05	0	0	0	0	0	0	0	0	0	0	0	0	0	0	0	0	0	0	0	0	0	0	0	0	7.43e-05	0	0	0	4.62929e-05	8.88707e-05	3.91053e-06
Citrobacter koseri	0	0	0	0	0	0	0	0	0	0.00152421	0	0	0	0.000236714	0	7.24e-05	0	0	0	0	0	0	0	0	0	0	0	0	0	0	0	0	0	0	0	0	0	0	0	0	4.58332e-05	9.16663e-05	0
Altererythrobacter dongtanensis	0	0	0	0	0	0	0	0	0	0	0	0	0	0	0	0	0	0	0	0	0	0	0	0	0	0	0	0	0	0	0	0.00175968	0	0	0	0	0	0	0	0	4.39919e-05	0	9.26146e-05
Sphingomonas sp. oral taxon 004	0	0	0	0	0	0	0	0	0	0	0	0	0	0	0	0	0	0	0	0	0	0	0	0	0	0	0	0	0	0	0	0.00175968	0	0	0	0	0	0	0	0	4.39919e-05	0	9.26146e-05
Burkholderiales [G] sp. Oral Taxon A57	0	0	0	0	0	0	0.000395218	0	0	0	0	0	0	0	0	0	0	0	0	0	0	0	0	0	0	0	0	0	0	0	0	0.00134071	0	0	0	0	0	0	0	0	4.33981e-05	1.97609e-05	7.05635e-05
Campylobacter ureolyticus	0	0	0	0	0.0010252	0	0	0	0	0	0	0	0	0.000710143	0	0	0	0	0	0	0	0	0	0	0	0	0	0	0	0	0	0	0	0	0	0	0	0	0	0	4.33836e-05	8.67673e-05	0
Veillonella denticariosi	0	0	0	0	0	0	0	0	0	0	0	7.25e-05	0	0	0	0	0.000665399	0	0	0	0	0	0	4.92e-05	0	0	0.000128559	0	0.000724263	0	0	0	0	7.43e-05	0	0	0	0	0	0	4.28555e-05	3.6895e-05	5.13854e-05
Prevotella buccae	0	0	0	0.000285857	0	0	0	0	0.000132275	0	0	7.25e-05	0.000979432	0	0	0	0	0	0	0	0	0	0	0	0	0	0	0	0	0	0	0	0	0	0	0	0	0	0.000224845	0	4.23727e-05	7.35032e-05	1.18339e-05
Prevotella veroralis nov 97.35%	0	0	0	0	0	0	0	0	0	0	0	0	0	0.000118357	0	0	9.51e-05	0.000410124	0	0	0	0	0	0	0	0	0	0.000324123	0	0	0	0	5.14e-05	0	0	0	0	0.000578226	0	0.000105899	4.20807e-05	3.1179e-05	5.57709e-05
Sphingomonas humi	0	0	0	0	0	0	0	0	0	0	0	0	0	0	0	0	0	0	0	0	0	0	0	0	0	0	0	0	0	0	0	0.00167588	0	0	0	0	0	0	0	0	4.18971e-05	0	8.82044e-05
Ralstonia pickettii nov 80.51%	0	0	0	0	0	0	0	0	0	0	0	0	0	0	0	0	0	0	0	0	0	0	0	0	0	0	0	0	0	0	0.0016621	0	0	0	0	0	0	0	0	0	4.15524e-05	0	8.74787e-05
Porphyromonas endodontalis nov 84.27%	0	0	0	0	0	0	0	0	0	0	0	0	0	0	0	0	0	0	0	0	0	0.00147016	0	0	0	0	0	0	0	0	0	0	0	0	0	0	0.000148544	0	0	0	4.04675e-05	0	8.51947e-05
Propionibacterium granulosum	0	0	0	0	0	0	0	0	0	0	0	0.000725479	0	0	0	7.24e-05	0	0	0	0	0	0	0	0	0	0	0	0	0	0	0	0.000754148	0	0	6.57e-05	0	0	0	0	0	4.04432e-05	3.9894e-05	4.31499e-05
Peptostreptococcaceae [G] sp. Oral Taxon B61	0	0.00124325	0	0	0	0	0	0	0	0	0.000124541	7.25e-05	0	0	0	0	0	0.000175768	0	0	0	0	0	0	0	0	0	0	0	0	0	0	0	0	0	0	0	0	0	0	4.04015e-05	8.0803e-05	0
Dialister pneumosintes	0.000107521	7.1e-05	0	0	0.000512601	0	0	0	0.000132275	0	0	0	0	0	5.42e-05	0	0.000380228	0	5.69e-05	0	0	0	0	0	0	0	0	0	0	0	0	0	0	7.43e-05	0.000197174	0	0	0	0	0	3.9655e-05	6.57362e-05	1.42881e-05
Neisseria pharyngis	0	0	0	0	0	0	0	0	0	0	0	0	0	0	0	0	0	0	0	0	0	0	0	0	0	0	0	0	0	0	0	0	0	0	0.00157739	0	0	0	0	0	3.94348e-05	0	8.30206e-05
Haemophilus parainfluenzae nov 97.15%	0	0	0.00112594	0	0	0	0	0	0	0	0	7.25e-05	0	0	0	0	0	5.86e-05	0	0	0	0	0	0	9.51e-05	0	0	0	0	0	0	0	0	0	0	0	0.000222816	0	0	0	3.9374e-05	6.28523e-05	1.67324e-05
TM7 [G-3] sp. oral taxon 351	0	0	0	0	0	0	0	0	6.61e-05	0	0	0	0	0	0	0	0	0	0.000113766	0	0	0	0.000641766	0	0	0	0	0	0.000103466	0	0	0	5.14e-05	0.000148644	0	0	0	0	0	0.000423594	3.87184e-05	8.9933e-06	7.20458e-05
Leuconostoc pseudomesenteroides Oral Taxon A60	0	0	0	0	0	0	0	0	0	0.00152421	0	0	0	0	0	0	0	0	0	0	0	0	0	0	0	0	0	0	0	0	0	0	0	0	0	0	0	0	0	0	3.81053e-05	7.62106e-05	0
Treponema sp. oral taxon 517	0	0	0	0	0.0012815	0	0	0	0	0	0	0	0	0	0	0	0	0.000234357	0	0	0	0	0	0	0	0	0	0	0	0	0	0	0	0	0	0	0	0	0	0	3.78965e-05	7.5793e-05	0
Comamonas testosteroni nov 93.81%	0	0	0	0	0	0	0	0	0	0	0	0	0	0	0	0	0	0	0	0	0	0	0	0	0	0	0	0	0	0	0	0.0015083	0	0	0	0	0	0	0	0	3.77074e-05	0	7.9384e-05
Pseudomonas stutzeri	0	0	0	0	0	0	0.00138326	0	0	0	0	0	0	0	0	0	0	0	0	0	0	0	0	0	0	0	0	0	0	0	0	0	0	0	0	0	0	0	0.000112423	0	3.73922e-05	6.91631e-05	5.917e-06
Haemophilus sp. Oral Taxon C82	0	0	0	0	0	0	0	0	0	0	0	0	0	0	0	0	0	0	0	0	0	0	0	0	0	0	0	0	0.00124159	0	0.000249314	0	0	0	0	0	0	0	0	0	3.72727e-05	0	7.84688e-05
Aggregatibacter multispecies spp29 2	0	0	0	0	0	0.000322754	0	0	0.000396825	0	0	0	0.000108826	0	0	0	0	0	0	0	0	0.00066157	0	0	0	0	0	0	0	0	0	0	0	0	0	0	0	0	0	0	3.72494e-05	4.14203e-05	3.48195e-05
Moraxella lacunata	0	0	0	0	0	0	0	0	0	0	0.0010586	7.25e-05	0	0	0	0	0	0.000351535	0	0	0	0	0	0	0	0	0	0	0	0	0	0	0	0	0	0	0	0	0	0	3.70658e-05	7.41316e-05	0
Leptotrichia sp. oral taxon 225 nov 97.62%	0	0	0	0	0	0	0	0	0	0	0.000249082	0	0	0	0	0	0	0	0	0	0	0	0	0	0	0	0	0	0	0	0	0	0.0012326	0	0	0	0	0	0	0	3.70421e-05	1.24541e-05	6.48738e-05
Prevotella dentalis	0	0	0	0	0.000512601	0	0	0	0	0	6.23e-05	7.25e-05	0	0	0	0	0	0.000175768	0	0	0	0	0	0	0	0	0	0.000162061	0	0.00010321	0	0	5.14e-05	0	0	0	0	0	0.000337268	0	3.69277e-05	4.11584e-05	3.44178e-05
Afipia broomeae nov 93.14%	0	0.000284172	0	0	0	0	0	0.00119136	0	0	0	0	0	0	0	0	0	0	0	0	0	0	0	0	0	0	0	0	0	0	0	0	0	0	0	0	0	0	0	0	3.68882e-05	7.37765e-05	0
Prevotella sp. oral taxon 300	0.000107521	0	0.000402123	0	0	0	9.88e-05	0	0	0.000117247	0	7.25e-05	0.000163239	0	0	0	0	0	0	0	0.000284603	0	0	0	0	0	6.43e-05	0	0	0	0	0	0	7.43e-05	0	0	0	8.26e-05	0	0	3.66808e-05	4.80715e-05	1.16421e-05
Peptostreptococcaceae [XI][G-4] sp. oral taxon 369	0	3.55e-05	0	0	0.000683469	0	9.88e-05	0	0	0	0	0	0	0	0	0	0	0	0	0	0	0	0	0	0	0	0	0	0	0.00010321	0	0	0	0	0.000460072	0	0	8.26e-05	0	0	3.65913e-05	4.08885e-05	3.39938e-05
Dietzia cinnamea nov 93.21%	0	3.55e-05	0	0	0	0	0	0	0	0	0	0	0	5.92e-05	0	0	0	0.00134755	0	0	0	0	0	0	0	0	0	0	0	0	0	0	0	0	0	0	0	0	0	0	3.60563e-05	7.21126e-05	0
Peptostreptococcaceae [XI][G-6] [Eubacterium] nodatum	0	0.000177607	0	0	0	0	0	0	0	0	0	0	0	0	0	0	0	0.000937427	0	0	0	0	0	0	0	0	0	0	0	0	0	0	0	7.43e-05	0.000131449	0	0	0	0.000112423	0	3.58301e-05	5.57517e-05	1.67459e-05
Aggregatibacter paraphrophilus	0	0	0	0	0	0.000860678	0	0	0	0	0	0	5.44e-05	0	0	0	0	0	0.000511945	0	0	0	0	0	0	0	0	0	0	0	0	0	0	0	0	0	0	0	0	0	3.56756e-05	7.13511e-05	0
Atopobium sp. oral taxon 199	0	0.000213129	0	0	8.54e-05	0	0	0	0.000396825	0	0	0.000217644	0	0	0	0	0	5.86e-05	0.000455063	0	0	0	0	0	0	0	0	0	0	0	0	0	0	0	0	0	0	0	0	0	3.56665e-05	7.13331e-05	0
Veillonella sp. Oral Taxon C09	0	0	0	0	0	0	0	0	0	0	0	0	0	0	0	0	0	0	0	0	0	0	0	9.85e-05	0	0	6.43e-05	0	0.000103466	0.00010321	0	0	0	0.000371609	0	0	0	0.000578226	0	0.000105899	3.56302e-05	0	7.50111e-05
Neisseria flavescens|subflava nov 97.15%	0	0	0	0	0	0	0	0	0	0	0	0	0	0	0	0	0	0	0	0	0	0	0	0	0	0	0	0	0	0	0.00141278	0	0	0	0	0	0	0	0	0	3.53196e-05	0	7.43569e-05
Klebsiella pneumoniae	0	0	0.000482548	0	0	0	0	0	0	0	0	0	0	0.000710143	0	0	0	0	0	0	9.49e-05	0	0	0	0	0	0	0	0	0	0	0	0	0	0	0	0	0	0.000112423	0	3.50004e-05	5.96346e-05	5.917e-06
Bradyrhizobium sp. str. LMG10689	0	0	0	0	0	0	0	4.11e-05	0	0	0	0	0.000707368	0	0	0	0	0	0	0	0	0	0	0	0	0	0.000128559	0	0	0	0	0.000502765	0	0	0	0	0	0	0	0	3.44948e-05	3.74234e-05	3.32276e-05
Streptococcus dysgalactiae	0	0	0	0	0	0	0	0	0	0	0	0	0	0	0	0	0.000380228	0.000937427	0	0	0	0	0	0	0	0	0	0	0	0	0	0	0	0	0	0	0	0	0	0	3.29414e-05	6.58828e-05	0
Leptotrichia sp. oral taxon 221 nov 90.45%	0.00096769	0	0.000160849	0	0.000170867	0	0	0	0	0	0	0	0	0	0	0	0	0	0	0	0	0	0	0	0	0	0	0	0	0	0	0	0	0	0	0	0	0	0	0	3.24851e-05	6.49703e-05	0
Peptostreptococcaceae [XI][G-7] sp. oral taxon 922	0	0	0	0	0	0	0	0	0	0	0.000996326	0.000217644	0	0	0	0	0	0	0	0	0	0	0	0	0	0	0	0	0	0	0	0	0	0	0	0	7.43e-05	0	0	0	3.22068e-05	6.06985e-05	3.91053e-06
Scardovia wiggsiae	0	0	0	0	8.54e-05	0	0.000592827	8.22e-05	0	0	0	0.000145096	0	0	0	0	0	0	5.69e-05	0	0	0	0	0	0	0	0	0	0	0	0	0	0	0	0	6.25e-05	0	0.000247811	0	0	3.18184e-05	4.81212e-05	1.63322e-05
Staphylococcus hominis	5.38e-05	0	0	7.15e-05	0	0	0	0	0	0	0	0.000145096	0	0	0	0	0	0.000117178	0	0	0	0	0	0	0	0	0	0	0	0	0	0.000418971	0	0	0	0	0	0	0.000449691	0	3.14059e-05	1.93787e-05	4.57191e-05
Mogibacterium timidum	0	0	0	0	0	0	0	0	0	0	0	7.25e-05	0	0	0.00037926	0	0	0.000117178	5.69e-05	0	0	0	0	0	0	0	0	0	0	0.00010321	0	0	0	0.000148644	0.000131449	0	0	0	0.000224845	0	3.08497e-05	3.12919e-05	3.20078e-05
Aggregatibacter aphrophilus nov 95.33%	0	0	0	0	0	0	0	0	0	0	0	0.00123331	0	0	0	0	0	0	0	0	0	0	0	0	0	0	0	0	0	0	0	0	0	0	0	0	0	0	0	0	3.08328e-05	6.16657e-05	0
Anaerolineae [G-1] sp. oral taxon 439	0	0	0.000723822	0	0	0	0	0	0.00026455	0	0	0	0	0	0	0	0	0	0	0	0	0	0	0	0	0	0	0	0	0	0	0	0	0	6.57e-05	0	0	0.000165207	0	0	3.0482e-05	4.94186e-05	1.2153e-05
Treponema sp. Oral Taxon G85	0	0	0	0	0.000939769	0	0.000197609	0	0	0	0	0	0	0	0	0	0	0	0	0	0	0	0	0	0	0	0	8.1e-05	0	0	0	0	0	0	0	0	0	0	0	0	3.04594e-05	5.68689e-05	4.26316e-06
Sphingomonas sp. oral taxon 006 nov 92.26%	0	0	0	0	0	0	0	0	0	0	0	0	0	0	0	0	0	0.000117178	0	0	0	0	0	0	0	0	0	0	0	0	0	0.00108932	0	0	0	0	0	0	0	0	3.01626e-05	5.8589e-06	5.73329e-05
Streptococcus sinensis	0.000107521	0	8.04e-05	0	0	0	0	0	6.61e-05	0	0	0	0	0	0	0	0	0	0	0	0	0	0	0	9.51e-05	0.000281334	0	0	0	0	0	0	0.000564943	0	0	0	0	0	0	0	2.9885e-05	1.2701e-05	4.95462e-05
Actinomyces sp. oral taxon 178	0	0	0	0	0	0	0	0	0	0	0	0	0	0	0	0	0	0	0	0	0	0	0	0	0	0.001055	0	0	0	0	0	0	5.14e-05	0	0	0	0	8.26e-05	0	0	2.9725e-05	0	6.2579e-05
Porphyromonas pasteri	0	0	0	0	0	0	0	0	0	0	0	0	0	0	0	0	0	0	0	0	0	0	0.000256706	0	9.51e-05	0	0	0	0.000310398	0	0.000249314	0	0	0	0	0.000124984	0.000148544	0	0	0	2.96262e-05	0	6.23708e-05
Treponema vincentii	0	0	0	0	0.000170867	0	0	0	0.00026455	0	6.23e-05	0	0	0	0.00016254	0	0	5.86e-05	0	0	0	0	0	0	0	0	0	0	0	0	0	0	0	0	0.000460072	0	0	0	0	0	2.94732e-05	3.59428e-05	2.42143e-05
Peptoniphilaceae [G-2] sp. oral taxon 790	0	0	0	0	0	0	0	0	0	0	0	0	0	0	0	0	0	0.00117178	0	0	0	0	0	0	0	0	0	0	0	0	0	0	0	0	0	0	0	0	0	0	2.92946e-05	5.85892e-05	0
Propionivibrio sp. Oral Taxon C33	0	0	0	0	0	0	0	0	0.000198413	0	6.23e-05	0	0	0	0	0	0	0	0	0	0	0	0	0	0	0.000140667	0	0	0	0	0	0	0.000770376	0	0	0	0	0	0	0	2.92939e-05	1.30356e-05	4.79496e-05
Kocuria polaris Oral Taxon A70	0	0	0	0	0	0	0	0	0	0	0	0	0.000979432	0	0	0	0.000190114	0	0	0	0	0	0	0	0	0	0	0	0	0	0	0	0	0	0	0	0	0	0	0	2.92386e-05	5.84773e-05	0
Pseudomonas stutzeri nov 87.27%	0	0	0	0	0	0	0	0	0	0	0	0	0	0	0	0	0	0	0	0	0	0	0	0	0	0	0	0	0	0	0.00116347	0	0	0	0	0	0	0	0	0	2.90867e-05	0	6.12351e-05
TM7 [G-1] sp. oral taxon 348	0	0	0	0	0	0	0	0	6.61e-05	0	0	0	0	0	0	0	0	0	0	0	0	0	0	0	0	0.000633	0	0	0	0	0	0	0.000462226	0	0	0	0	0	0	0	2.90332e-05	3.305e-06	5.76435e-05
Aggregatibacter actinomycetemcomitans	0.000376324	0	0	0	0	0	0	0	0	0	0	0.000725479	0	0	0	0	0	0	0	0	0	0	0	0	0	0	0	0	0	0	0	0	5.14e-05	0	0	0	0	0	0	0	2.88301e-05	5.50901e-05	2.70526e-06
Bacteroidetes [G-3] sp. oral taxon 503 nov 77.15%	0	0	0	0	0	0	0	0	0	0	0	0	0	0	0	0	0	0.000937427	0	0	0	0	0	0	0	0	0	0	0	0	0	0	0	0	0.000197174	0	0	0	0	0	2.8365e-05	4.68714e-05	1.03776e-05
Porphyromonas sp. oral taxon 277	0	0	0	0	0	0	0	0	0.000132275	0	6.23e-05	0	0	0	0	0	0	0	0	0	0	7.35e-05	0	0	0.000570505	0	0	0	0	0.00010321	0	0	0	0	0	0.000187477	0	0	0	0	2.82317e-05	9.72875e-06	4.91943e-05
Candidatus Phytoplasma asteris nov 78.62%	0	0	0	0	0	0	0	0	0.000132275	0	0	0	0	0	0	0	0	0.000996016	0	0	0	0	0	0	0	0	0	0	0	0	0	0	0	0	0	0	0	0	0	0	2.82073e-05	5.64146e-05	0
Lactobacillus ultunensis	0	0	0.00112594	0	0	0	0	0	0	0	0	0	0	0	0	0	0	0	0	0	0	0	0	0	0	0	0	0	0	0	0	0	0	0	0	0	0	0	0	0	2.81486e-05	5.62972e-05	0
Porphyrobacter tepidarius nov 96.31%	0	0	0	0	0	0	0	0	0	0	0	0	0	0	0	0	0	0	0	0	0	0	0	0	0.000285252	0	0	0	0	0	0	0.000837942	0	0	0	0	0	0	0	0	2.80799e-05	0	5.91155e-05
Kocuria sp. Oral Taxon B56	0	0	0	0	0	0.000215169	0.000691631	0	0	0	0	0	0	0	0	0	0	0	0	0.000129338	0	0	0	0	0	0	0	8.1e-05	0	0	0	0	0	0	0	0	0	0	0	0	2.79284e-05	5.18069e-05	4.26316e-06
Fretibacterium sp. oral taxon 358	0	0	0	0	0.00111064	0	0	0	0	0	0	0	0	0	0	0	0	0	0	0	0	0	0	0	0	0	0	0	0	0	0	0	0	0	0	0	0	0	0	0	2.77659e-05	5.55318e-05	0
Mycobacterium neoaurum nov 89.34%	0	0	0	0	0	0	0	0	0	0	0	0	0	0	0	0	0	0	0	0	0	0	0	0	0	0	0	0	0	0	0	0.00108932	0	0	0	0	0	0	0	0	2.72331e-05	0	5.73329e-05
TM7 [G-1] sp. oral taxon 348 nov 93.45%	0	0	0	0	0	0	0	0	0	0	0	0	0	0	0	0	0	0	0	0	0	0	0	0	0	0.001055	0	0	0	0	0	0	0	0	0	0	0	0	0	0	2.6375e-05	0	5.55264e-05
Bacteroidetes [G-5] sp. oral taxon 505 nov 95.45%	0	0	0	0	0	0	0	0	0	0	0	0	0	0	0	0	0	0	0	0	0	0	0	0	0	0	0	0	0	0	0	0	0	0	0.00105159	0	0	0	0	0	2.62899e-05	0	5.53471e-05
Lachnospiraceae [G-7] sp. oral taxon 086 nov 87.65%	0	0	0	0	0.000598035	0	0	0	0	0	0.000435893	0	0	0	0	0	0	0	0	0	0	0	0	0	0	0	0	0	0	0	0	0	0	0	0	0	0	0	0	0	2.58482e-05	5.16964e-05	0
Bacteroidetes [G-5] sp. oral taxon 505	0	0	0	0	0	0	0	0	0	0	0	0	0	0	0.00059598	0	0	0	0	0	0	0	0	0	0	0	0	0	0	0	0	0	0	0	0.000197174	0	0	0	0.000224845	0	2.545e-05	2.9799e-05	2.22115e-05
Sphingomonas sp. oral taxon 006 nov 83.04%	0	0	0	0	0	0	0	0	0	0	0	0	0	0	0	0	0	0	0	0	0	0	0	0	0	0	0	0	0	0	0	0.00100553	0	0	0	0	0	0	0	0	2.51382e-05	0	5.29226e-05
Alphaproteobacteria [G] sp. Oral Taxon C96	0	0.000177607	0	0	0	0	0	0	0.000462963	0	0	0.000362739	0	0	0	0	0	0	0	0	0	0	0	0	0	0	0	0	0	0	0	0	0	0	0	0	0	0	0	0	2.50827e-05	5.01654e-05	0
Peptococcus sp. oral taxon 167	5.38e-05	0	0	0	0.000768902	0	0	0	0	0	6.23e-05	0	0	0	5.42e-05	0	0	5.86e-05	0	0	0	0	0	0	0	0	0	0	0	0	0	0	0	0	0	0	0	0	0	0	2.4945e-05	4.98901e-05	0
Kocuria sp. oral taxon 189 nov 95.56%	0	0	0	0	0	0	0	0	6.61e-05	0	0	0	0	0	0	0	0.000285171	5.86e-05	0	0	0	0	0	0	0	0	0	0.000162061	0	0	0	0.000418971	0	0	0	0	0	0	0	0	2.47726e-05	2.04935e-05	3.05806e-05
Ralstonia pickettii	0	0.00024865	0	0	0	0	0	0.000739463	0	0	0	0	0	0	0	0	0	0	0	0	0	0	0	0	0	0	0	0	0	0	0	0	0	0	0	0	0	0	0	0	2.47028e-05	4.94057e-05	0
Staphylococcus caprae nov 77.89%	0	0	0	0	0	0	0	0	0	0	0	0	0	0	0	0	0	0	0	0	0	0	0	0	0	0.000984667	0	0	0	0	0	0	0	0	0	0	0	0	0	0	2.46167e-05	0	5.18246e-05
Selenomonas sp. oral taxon 137	0	0	0	0.000571714	8.54e-05	0	0	0	0	0	0	0	0	0	0	0	0	0	0	0	0	0	0	0	0	0	0	0	0	0	0	0	5.14e-05	0	0.000262898	0	0	0	0	0	2.42853e-05	3.28557e-05	1.6542e-05
Porphyrobacter tepidarius nov 94.70%	0	0	0	0	0	0.000968263	0	0	0	0	0	0	0	0	0	0	0	0	0	0	0	0	0	0	0	0	0	0	0	0	0	0	0	0	0	0	0	0	0	0	2.42066e-05	4.84132e-05	0
Leptotrichia multispecies sppn1 2 nov 95.47%	0	0.000959079	0	0	0	0	0	0	0	0	0	0	0	0	0	0	0	0	0	0	0	0	0	0	0	0	0	0	0	0	0	0	0	0	0	0	0	0	0	0	2.3977e-05	4.7954e-05	0
Tannerella forsythia nov 97.31%	0	0	0	0	0	0	0	0	0.000396825	0	0.000560433	0	0	0	0	0	0	0	0	0	0	0	0	0	0	0	0	0	0	0	0	0	0	0	0	0	0	0	0	0	2.39315e-05	4.78629e-05	0
Alloprevotella sp. oral taxon 308 nov 94.74%	0	0	0	0	0	0	0	0	0	0	0	0	0	0	0	0	0	0	0	0	0	0	0	0	0	0	0	0	0	0	0	0	0	0	0	0	0	0	0	0.000953087	2.38272e-05	0	5.01625e-05
Oribacterium parvum	0	0	0	0	0	0	0	0	0	0	0	0	0	0	0	0	0	0	0	0	0	0	0	0	0	0	0	0	0.000103466	0	0	0	0	0	0	0	0	0	0	0.000847188	2.37663e-05	0	5.00344e-05
Bifidobacterium dentium	0	0	0	0	0	0	0	0	0	0	0	0	0	0	0	0	0	0	0	0	0	0	0	0	0	0	6.43e-05	0.000162061	0	0	0	0	0	0	0.000722971	0	0	0	0	0	2.37333e-05	0	4.99648e-05
Treponema sp. oral taxon 262 nov 89.27%	0	0	0	0	0.000939769	0	0	0	0	0	0	0	0	0	0	0	0	0	0	0	0	0	0	0	0	0	0	0	0	0	0	0	0	0	0	0	0	0	0	0	2.34942e-05	4.69885e-05	0
Pseudocitrobacter faecalis	0	0	0	0	0	0	0	0	0	0.000937976	0	0	0	0	0	0	0	0	0	0	0	0	0	0	0	0	0	0	0	0	0	0	0	0	0	0	0	0	0	0	2.34494e-05	4.68988e-05	0
Olsenella sp. oral taxon 809	0	0	0	0	0	0	0	0	0	0	0	0	0	0	0	0	0	0.000937427	0	0	0	0	0	0	0	0	0	0	0	0	0	0	0	0	0	0	0	0	0	0	2.34357e-05	4.68714e-05	0
Selenomonas infelix	0	0	0	0	0.000170867	0	0	4.11e-05	6.61e-05	0	0	0	0.000163239	0	0	0	0	0.000175768	0	0	0	0	0	0	0	0	0	0	0	0	0	0	5.14e-05	0	0.000262898	0	0	0	0	0	2.32843e-05	3.08537e-05	1.6542e-05
Capnocytophaga sp. oral taxon 338	0	0	0	0	0	0	0	0	0	0	0	0	0	0	0	0	0	0	0.000455063	0	0	0	0	0	0	0.000281334	0	0	0	0	0	0	0	0	0.000131449	6.25e-05	0	0	0	0	2.32587e-05	2.27532e-05	2.50149e-05
Neisseria mucosa nov 96.31%	0	0	0	0	0	0	0	0	0	0	0	0	0	0	0	0	0	0	0	0	0	0	0	0	0	0	0	0	0	0.000928888	0	0	0	0	0	0	0	0	0	0	2.32222e-05	0	4.88888e-05
Selenomonas sp. oral taxon 134	0	3.55e-05	0	0	0	0	0	0	0	0	0.000747245	0.000145096	0	0	0	0	0	0	0	0	0	0	0	0	0	0	0	0	0	0	0	0	0	0	0	0	0	0	0	0	2.3196e-05	4.63921e-05	0
Porphyromonas asaccharolytica nov 97.74%	0	0	0	0	0	0	0	0	0	0	0	0	0	0.000887679	0	0	0	0	0	0	0	0	0	0	0	0	0	0	0	0	0	0	0	0	0	0	0	0	0	0	2.2192e-05	4.4384e-05	0
Porphyromonas multispecies spp28 2	0	0	0	0	0	0	0	0	0	0	0	0	0	0	0	0	0	0	0	0	0	0	0	0	0	0	0	0	0	0	0	0	0.000256792	0	0	0.000624922	0	0	0	0	2.20429e-05	0	4.6406e-05
Bacteroides pyogenes nov 83.93%	0	0	0	0	0	0	0	0	0	0	0	0	0	0	0	0	0	0.000878838	0	0	0	0	0	0	0	0	0	0	0	0	0	0	0	0	0	0	0	0	0	0	2.1971e-05	4.39419e-05	0
Oribacterium sp. oral taxon 102 nov 96.45%	0	0	0	0	0	0	0	0	0	0	0	0	0	0	0	0	0	0.000878838	0	0	0	0	0	0	0	0	0	0	0	0	0	0	0	0	0	0	0	0	0	0	2.1971e-05	4.39419e-05	0
Stomatobaculum sp. oral taxon 373	0	0	0	0	0	0	0	0	0	0	0	0	0	0	0	0	0	0.000878838	0	0	0	0	0	0	0	0	0	0	0	0	0	0	0	0	0	0	0	0	0	0	2.1971e-05	4.39419e-05	0
Campylobacter concisus nov 97.84%	0	0	0	0	0	0	0	0	0	0	0.000871785	0	0	0	0	0	0	0	0	0	0	0	0	0	0	0	0	0	0	0	0	0	0	0	0	0	0	0	0	0	2.17946e-05	4.35893e-05	0
Treponema socranskii nov 97.74%	0	0	0	0	0	0	0	0	0.000793651	0	0	0	0	0	0	0	0	0	0	0	0	0	0	0	0	0	0	0	0	0	0	0	0	0	0	0	7.43e-05	0	0	0	2.16988e-05	3.96826e-05	3.91053e-06
Peptococcus sp. oral taxon 168	0	0	0	0	0	0	0	0	0	0	6.23e-05	0	0	0	5.42e-05	0	0	0.000585892	0	0	0	0	0	0	0	0	0	0	0	0	0	0	0	0	0	0	0.000148544	0	0	0	2.12734e-05	3.51196e-05	7.81811e-06
Treponema sp. oral taxon 236	0	0	0	0	0	0	0	0	0.00026455	0	0	0	0	0	5.42e-05	0	0	0.000527303	0	0	0	0	0	0	0	0	0	0	0	0	0	0	0	0	0	0	0	0	0	0	2.11513e-05	4.23027e-05	0
Prevotella pleuritidis	0	7.1e-05	0	0	0	0	0	0	0	0	0	0	0	0	0	0	0	0	0	0	0	0	0	4.92e-05	0	0	0	0	0	0	0	0	0	7.43e-05	0	0	0	8.26e-05	0.000562114	0	2.09803e-05	3.55e-06	4.04323e-05
Micrococcus luteus Oral Taxon C78	0	0	0	0	0	0	0	0	0	0	0	0	0	0	0	0	0	0	0	0	0	0	0	0	0	0	0	0	0	0	0	0.000837942	0	0	0	0	0	0	0	0	2.09486e-05	0	4.41022e-05
Paracoccus marcusii Oral Taxon A21	0	0	0	0	0	0	0	0	0	0	0	0	0	0	0	0	0	0	0	0	0	0	0	0	0	0	0	0	0	0	0	0.000837942	0	0	0	0	0	0	0	0	2.09486e-05	0	4.41022e-05
Rhodobacter capsulatus nov 88.81%	0	0	0	0	0	0	0	0	0	0	0	0	0	0	0	0	0	0	0	0	0	0	0	0	0	0	0	0	0	0	0	0.000837942	0	0	0	0	0	0	0	0	2.09486e-05	0	4.41022e-05
Delftia sp. Oral Taxon A59	0	0.000106564	0	0.000214393	0	0	0	0.000492975	0	0	0	0	0	0	0	0	0	0	0	0	0	0	0	0	0	0	0	0	0	0	0	0	0	0	0	0	0	0	0	0	2.03483e-05	4.06966e-05	0
Chromobacterium violaceum nov 82.41%	0	0	0	0	0	0	0	0	0	0	0	0	0	0	0	0	0	0	0	0	0	0	0	0	0	0	0	0	0.000310398	0	0.000498629	0	0	0	0	0	0	0	0	0	2.02257e-05	0	4.25804e-05
Haemophilus sp. oral taxon 908 nov 97.54%	0	0	0	0	0	0	0	0	0	0	0	0	0	0	0	0	0	0	0	0	0	0.000808586	0	0	0	0	0	0	0	0	0	0	0	0	0	0	0	0	0	0	2.02147e-05	0	4.25572e-05
Prevotella nanceiensis nov 96.53%	0	0	0	0	0	0	0	0	0	0	0	0.000798027	0	0	0	0	0	0	0	0	0	0	0	0	0	0	0	0	0	0	0	0	0	0	0	0	0	0	0	0	1.99507e-05	3.99014e-05	0
Eggerthia catenaformis	0	0.000355215	0	0	0	0	0	0	0	0	0	0	0	0	0	0	0	0.000351535	0	0	0	0	0	0	0	0	0	0	0	0	0	0	0	0	6.57e-05	0	0	0	0	0	1.93112e-05	3.53375e-05	3.45789e-06
Prevotella sp. oral taxon 315	5.38e-05	0	0	0	0	0	0	8.22e-05	6.61e-05	0	0.000124541	0	0	0	0.00010836	0	0	0	5.69e-05	0	0	0	0	0	0	0	0	0	0	0	0	0	5.14e-05	7.43e-05	6.57e-05	0	0	8.26e-05	0	0	1.91475e-05	2.45951e-05	1.44211e-05
Sphingomonas multispecies spp37 2	0	0.000390736	0	0	0	0	0	0.000369731	0	0	0	0	0	0	0	0	0	0	0	0	0	0	0	0	0	0	0	0	0	0	0	0	0	0	0	0	0	0	0	0	1.90117e-05	3.80233e-05	0
Actinomyces timonensis nov 92.97%	0	0	0	0	0	0	0	0	0	0	0	0	0	0	0.00075852	0	0	0	0	0	0	0	0	0	0	0	0	0	0	0	0	0	0	0	0	0	0	0	0	0	1.8963e-05	3.7926e-05	0
Corynebacterium simulans Oral Taxon A35	0	0	0	0	0	0	0	0	0	0	0	0	0	0	0	0	0	0	0	0	0	0	0	0	0	0	0	0	0	0	0	0.000754148	0	0	0	0	0	0	0	0	1.88537e-05	0	3.9692e-05
Leptotrichia buccalis nov 90.28%	0	0	0	0	0	0	0	0	0	0	0	0	0	0	0	0	0	0	0	0	0	0	0	0	0	0	0	0.000162061	0	0	0	0	0	0	0.000591522	0	0	0	0	0	1.88396e-05	0	3.96623e-05
Propionibacterium sp. oral taxon 193	0	0	0	0	0	0.000753093	0	0	0	0	0	0	0	0	0	0	0	0	0	0	0	0	0	0	0	0	0	0	0	0	0	0	0	0	0	0	0	0	0	0	1.88273e-05	3.76547e-05	0
Leptotrichia sp. oral taxon 879	0	0	0	0	0	0	0	0	0	0	0	0	0	0	0	0	0	0	0	0	0	0	0	0	0	0	0	0	0	0	0	0	0	0	0	0	0	0.000743433	0	0	1.85858e-05	0	3.91281e-05
Prevotella pallens nov 95.55%	0	0	0	0	0	0	0	0	0	0	0	0	0	0	0	0	0	0	0	0	0	0	0	0	0	0	0	0	0	0	0	0	0	0.000743218	0	0	0	0	0	0	1.85804e-05	0	3.91167e-05
Simonsiella muelleri	0	0	0	0	0	0	0	0	0	0	0	0	0	0	0	0	0	0	0	0	0	0	0	0	0.000665589	7.03e-05	0	0	0	0	0	0	0	0	0	0	0	0	0	0	1.83972e-05	0	3.8731e-05
Selenomonas sp. oral taxon 892	0	0	0	0	0	0	0	0	0.000198413	0	0.000124541	0	0	0	0	0	0	0	0	0	0	0	0	0	0	0	0	0	0	0	0	0	0.000205434	0	0.000197174	0	0	0	0	0	1.81391e-05	1.61477e-05	2.11899e-05
Morganella sp. str. JB T16	0	0	0	0	0	0	0	0	0	0	0	0	0	0	0	0.000723641	0	0	0	0	0	0	0	0	0	0	0	0	0	0	0	0	0	0	0	0	0	0	0	0	1.8091e-05	3.61821e-05	0
Streptococcus sp. Oral Taxon B66	0	0	0	0	0	0	0	0	0	0	0	0	0	0	0	0	0	0	0	0	0	0	0	0	0	0	0	0	0	0.000412839	0	0	0	0	0	6.25e-05	0	0.000247811	0	0	1.80788e-05	0	3.80605e-05
Campylobacter curvus	0	0	0	0	0	0	0	0	0	0	0	0	0	0	0	0	0	0	0	0	0	0	0	0	0	0	0	0	0	0	0	0	0	0	0.000722971	0	0	0	0	0	1.80743e-05	0	3.80511e-05
TM7 [G-1] sp. oral taxon 349 nov 97.78%	0	0	0	0	0	0	0	0	0	0	0	0	0	0	0	0	0	0	0	0	0	0	0	0	0	0	0	0	0	0	0	0	0.000719018	0	0	0	0	0	0	0	1.79755e-05	0	3.78431e-05
Fusobacterium gonidiaformans	0	0	0	0	0	0	0	0	0	0	0	0	0	0	0	0	0	0.000351535	0.000227531	0.000129338	0	0	0	0	0	0	0	0	0	0	0	0	0	0	0	0	0	0	0	0	1.77101e-05	3.54202e-05	0
Leptotrichia sp. oral taxon 217	0	0	0	0	0	0	0	0	0	0	6.23e-05	0	0	0	0	7.24e-05	0	0	0	0	0	0	0	0	0.000380337	0.000140667	0	0	0	0	0	0	5.14e-05	0	0	0	0	0	0	0	1.76776e-05	6.735e-06	3.01265e-05
Streptococcus sp. oral taxon 056	0	0	0	0	0	0	0	0	6.61e-05	0	0	0	0	0	0.0002709	0	0	0	0	0	9.49e-05	0	0	0	0	0.000140667	0	0	0	0	0	0	5.14e-05	0	0	0	0	8.26e-05	0	0	1.76642e-05	1.685e-05	1.44562e-05
Klebsiella pneumoniae nov 94.93%	0	0	0	0	0	0	0	0	0	0.000703482	0	0	0	0	0	0	0	0	0	0	0	0	0	0	0	0	0	0	0	0	0	0	0	0	0	0	0	0	0	0	1.7587e-05	3.51741e-05	0
Fusobacterium simiae	0	0	0	0	0	0	0	0	0	0	0	0	0	0	0	0	0	0.00070307	0	0	0	0	0	0	0	0	0	0	0	0	0	0	0	0	0	0	0	0	0	0	1.75768e-05	3.51535e-05	0
Rothia mucilaginosa nov 90.36%	0	0	0	0	0	0	0	0	0	0	0	0	0	0	0	0	0	0	0	0	0	0	0	0.00049249	0	0	0	0	0.000206932	0	0	0	0	0	0	0	0	0	0	0	1.74856e-05	0	3.68117e-05
Moraxella nonliquefaciens	0	0	0	0.000428786	0	0	0	0	0.00026455	0	0	0	0	0	0	0	0	0	0	0	0	0	0	0	0	0	0	0	0	0	0	0	0	0	0	0	0	0	0	0	1.73334e-05	3.46668e-05	0
Rothia mucilaginosa nov 89.14%	0	0	0	0	0	0	0	0	0	0	0	0	0	0	0	0	0	0	0	0	0	0	0.000128353	0.000295494	0	0	0.000192839	0	0	0	0	0	0	7.43e-05	0	0	0	0	0	0	1.72746e-05	0	3.63677e-05
Alcaligenes sp. str. CO14	0.000161282	0	0	0	0	0.000430339	9.88e-05	0	0	0	0	0	0	0	0	0	0	0	0	0	0	0	0	0	0	0	0	0	0	0	0	0	0	0	0	0	0	0	0	0	1.72605e-05	3.45211e-05	0
Selenomonas multispecies spp36 2	0	0	0	0	0.000683469	0	0	0	0	0	0	0	0	0	0	0	0	0	0	0	0	0	0	0	0	0	0	0	0	0	0	0	0	0	0	0	0	0	0	0	1.70867e-05	3.41735e-05	0
Sphingobium xenophagum	0	0.000106564	0	0	0	0	0	0.000575138	0	0	0	0	0	0	0	0	0	0	0	0	0	0	0	0	0	0	0	0	0	0	0	0	0	0	0	0	0	0	0	0	1.70425e-05	3.40851e-05	0
Prevotella enoeca	0	0.000674908	0	0	0	0	0	0	0	0	0	0	0	0	0	0	0	0	0	0	0	0	0	0	0	0	0	0	0	0	0	0	0	0	0	0	0	0	0	0	1.68727e-05	3.37454e-05	0
Prevotella oulorum nov 89.60%	0	0	0	0	0	0	0	0	0	0	0	0	0.000217652	0	0	0	0	0.000117178	0	0	0	0	0	0	0	0	0	0	0	0	0	0	0	0	0	0	0	0	0.000337268	0	1.68025e-05	1.67415e-05	1.77509e-05
Corynebacterium mucifaciens nov 97.63%	0	0	0	0	0	0	0	0	0	0	0	0	0	0	0	0	0	0	0	0	0	0	0	0	0	0	0	0	0	0	0	0.000670354	0	0	0	0	0	0	0	0	1.67588e-05	0	3.52818e-05
Capnocytophaga multispecies spp33 3	0	0	0	0	0	0	0	0	0	0	0	0	0	0	0	0	0	0	0	0	0	0	0	0	0	0	0	0	0	0	0	0.000670354	0	0	0	0	0	0	0	0	1.67588e-05	0	3.52818e-05
Delftia acidovorans nov 93.02%	0	0	0	0	0	0	0	0	0	0	0	0	0	0	0	0	0	0	0	0	0	0	0	0	0	0	0	0	0	0	0	0.000670354	0	0	0	0	0	0	0	0	1.67588e-05	0	3.52818e-05
Haemophilus sp. oral taxon 036 nov 96.93%	0	0	0	0	0	0	0	0	0	0	0	0	0	0	0	0	0	0	0	0	0.000664074	0	0	0	0	0	0	0	0	0	0	0	0	0	0	0	0	0	0	0	1.66018e-05	0	0
Streptococcus sp. str. M334	0	0	0	0	0	0	0	0	0	0	0	0	0	0	0	0	0	0	0	0	0	0.00066157	0	0	0	0	0	0	0	0	0	0	0	0	0	0	0	0	0	0	1.65392e-05	0	3.48195e-05
Bacteroidetes [G-3] sp. oral taxon 436	0	0	0	0	0	0	0	0	0.000396825	0	0	0	0	0	0	0	0	0	0	0	0	0	0	0	0	0	0	0	0	0	0	0	0	0	0.000262898	0	0	0	0	0	1.64931e-05	1.98412e-05	1.38367e-05
Sphingomonas echinoides nov 94.93%	0	0.00024865	0	0	0	0	0	0.000410813	0	0	0	0	0	0	0	0	0	0	0	0	0	0	0	0	0	0	0	0	0	0	0	0	0	0	0	0	0	0	0	0	1.64866e-05	3.29732e-05	0
Corynebacterium kroppenstedtii	0	3.55e-05	0	0	0	0	0	0	0	0	0	0	0	5.92e-05	0.00016254	0	0	0	0	0	0	0.000147016	0	0	0	0	0	0	0	0	0	0.000251383	0	0	0	0	0	0	0	0	1.6391e-05	1.2862e-05	2.09684e-05
Actinomyces naeslundii nov 91.83%	0	0	0	0	0	0	0	0	0	0	0	0.000217644	0.000435303	0	0	0	0	0	0	0	0	0	0	0	0	0	0	0	0	0	0	0	0	0	0	0	0	0	0	0	1.63237e-05	3.26473e-05	0
Treponema parvum	0	0	0	0	0.000512601	0	0	0	0	0	0	0	0	0	0	0	0	0	0	0	0	0	0	0	0	0	0	0	0	0	0	0	0	7.43e-05	6.57e-05	0	0	0	0	0	1.6315e-05	2.56301e-05	7.36842e-06
Erysipelotrichaceae [G-1] sp. oral taxon 904	0	0	0	0	0	0	0	0	0	0	0	0	0	0	0	0	0	0.000585892	0	0	0	0	0	0	0	0	0	0	0	0	0	0	0	0	6.57e-05	0	0	0	0	0	1.62898e-05	2.92946e-05	3.45789e-06
Eikenella corrodens nov 94.55%	0	0	0	0	0	0	0	0	0	0	0	0	0	0.000650965	0	0	0	0	0	0	0	0	0	0	0	0	0	0	0	0	0	0	0	0	0	0	0	0	0	0	1.62741e-05	3.25482e-05	0
Arthrobacter humicola	0	0	0	0	0	0.000645508	0	0	0	0	0	0	0	0	0	0	0	0	0	0	0	0	0	0	0	0	0	0	0	0	0	0	0	0	0	0	0	0	0	0	1.61377e-05	3.22754e-05	0
Dolosigranulum pigrum	0	0	0	0.00050025	0	0	0	0	0	0	0	0	0	0	0	0.000144728	0	0	0	0	0	0	0	0	0	0	0	0	0	0	0	0	0	0	0	0	0	0	0	0	1.61245e-05	3.22489e-05	0
Catonella morbi nov 97.92%	0	0	0	0	0	0	0	0	0	0	0	0	0	0	0	0	0	0.000644481	0	0	0	0	0	0	0	0	0	0	0	0	0	0	0	0	0	0	0	0	0	0	1.6112e-05	3.2224e-05	0
Veillonella denticariosi nov 96.86%	0	0	0	0	0	0	0	0	0	0	0	0	0	0	0	0	0	0	0	0	0	0	0	0	0	0	0.000642797	0	0	0	0	0	0	0	0	0	0	0	0	0	1.60699e-05	0	3.38314e-05
Actinomyces meyeri	0	0	0	0	0	0	0	0	0	0	0	7.25e-05	0	0	0	0	0	0	0	0	0	0	0.000128353	4.92e-05	0	0	0	0	0	0	0	0	0	0	0.000197174	0	0	8.26e-05	0.000112423	0	1.60563e-05	3.625e-06	2.99868e-05
Peptostreptococcaceae [XI][G-4] multispecies spp34 2	0.000215042	0.000106564	0	0	0	0	0	0	0	0	0	0	0	0	0.00010836	0	9.51e-05	0.000117178	0	0	0	0	0	0	0	0	0	0	0	0	0	0	0	0	0	0	0	0	0	0	1.60561e-05	3.21122e-05	0
Massilia timonae	0	0	0	0	0	0	0	0	0	0	0	0	0	0	0	0	0.000380228	0.000175768	0	8.62e-05	0	0	0	0	0	0	0	0	0	0	0	0	0	0	0	0	0	0	0	0	1.60549e-05	3.21098e-05	0
Streptococcus australis nov 97.99%	0	0	0	0	0	0	0	0	0	0	0	0	0	0	0	0	0	0	0	0	0	0	0	0.000640236	0	0	0	0	0	0	0	0	0	0	0	0	0	0	0	0	1.60059e-05	0	3.36966e-05
TM7 [G-1] sp. oral taxon 349 nov 97.79%	0	0	0	0	0	0	0	0	0	0	0	0	0	0	0	0	0	0	0	0	0	0	0	0	0	0	0	0	0	0	0	0	0.000102717	7.43e-05	0.000460072	0	0	0	0	0	1.59272e-05	0	3.3531e-05
GN02 [G-1] sp. oral taxon 872 nov 93.28%	0	0	0	0	0	0	0	0	0	0	0.000186811	0	0	0	0	0	0	0	0	0	0	0	0	0	0	0	0	0	0	0	0	0	0	0	0	0	0.000445633	0	0	0	1.58111e-05	9.34055e-06	2.34544e-05
Prevotella sp. oral taxon 305	0	0	0.000321699	7.15e-05	0	0	0	0	0	0	0	0	0	0	0	0	0	5.86e-05	0	0	0	0	0	0	0	0	0	0	0	0	0	0	0	7.43e-05	0	0	0	0	0	0.000105899	1.58e-05	2.259e-05	9.48416e-06
Clostridiales [G] sp. Oral Taxon G74	0	0	0.000160849	0	8.54e-05	0	0	0	0	0	0	0	0	0	0	0	0	0.000175768	0	0	0	0	0	0	0	0	0	0	0	0	0	0	0	0	0.000197174	0	0	0	0	0	1.54798e-05	2.11008e-05	1.03776e-05
Haemophilus pittmaniae nov 81.14%	0	0	0	0	0	0	0	0	0	0	0	0	0	0	0	0	0	0	0	0	0	0	0	0.00049249	0	0	0	0	0	0	0	0	0	0	0	0.000124984	0	0	0	0	1.54369e-05	0	3.24986e-05
Bradyrhizobium elkanii	0	0	0	0	0	0	0	0.000616219	0	0	0	0	0	0	0	0	0	0	0	0	0	0	0	0	0	0	0	0	0	0	0	0	0	0	0	0	0	0	0	0	1.54055e-05	3.08109e-05	0
Coprococcus eutactus nov 78.28%	0	0	0	0	0	0	0	0	0	0	0	0	0	0	0	0	0.000285171	0	0	0	0	0	0	0	0	0	0	0	0	0	0	0	0	0	0	0	0	0.000330415	0	0	1.53896e-05	1.42586e-05	1.73903e-05
Veillonella atypica nov 95.14%	0	0	0	0	0	0	0	0	0	0	0	0	0	0	0	0	0	0	0	0	0	0	0	0	0	0	0	0	0	0	0	0	0	0.000297287	0	0	0	0	0	0.000317696	1.53746e-05	0	3.23675e-05
Capnocytophaga sp. oral taxon 901	0.000161282	0	0	0	0	0	0	0	0.00026455	0	0.000186811	0	0	0	0	0	0	0	0	0	0	0	0	0	0	0	0	0	0	0	0	0	0	0	0	0	0	0	0	0	1.53161e-05	3.06321e-05	0
Prevotella scopos	0	0	0	0	0	0	0	0	0	0.000468988	0	0	0	0	0	0	0	0	0	0.000129338	0	0	0	0	0	0	0	0	0	0	0	0	0	0	0	0	0	0	0	0	1.49581e-05	2.99163e-05	0
Bacteroidetes [G-5] sp. oral taxon 511 nov 97.93%	0	0	0	0	0.000598035	0	0	0	0	0	0	0	0	0	0	0	0	0	0	0	0	0	0	0	0	0	0	0	0	0	0	0	0	0	0	0	0	0	0	0	1.49509e-05	2.99018e-05	0
Streptococcus parasanguinis II nov 97.59%	0	0	0	0	0	0	0	0	0	0	0	0	0	0	0	0	0	0	0	0	0	0	0	0	0	0	0	0	0	0	0	0	0	0.000594575	0	0	0	0	0	0	1.48644e-05	0	3.12934e-05
Proteus mirabilis nov 94.72%	0	0	0	0	0	0	0	0	0	0	0	0	0	0.000591786	0	0	0	0	0	0	0	0	0	0	0	0	0	0	0	0	0	0	0	0	0	0	0	0	0	0	1.47946e-05	2.95893e-05	0
Veillonella parvula group nov 96.86%	0	0	0	0	0	0	0	0	0	0	0	0	0	0	0	0	0	0	0	0	0	0	0	0.000590987	0	0	0	0	0	0	0	0	0	0	0	0	0	0	0	0	1.47747e-05	0	3.11046e-05
Fusobacterium nucleatum subsp. vincentii nov 97.85%	0	0	0	0	0	0	0	0	0	0	0	0	0	0	0	0	0	0	0	0	0	0	0	0	0	0	0	0	0	0	0	0.000586559	0	0	0	0	0	0	0	0	1.4664e-05	0	3.08715e-05
Pseudomonas stutzeri Oral Taxon A68	0	0	0	0	0	0	0	0	0	0	0	0	0	0	0	0	0	0	0	0	0	0	0	0	0	0	0	0	0	0	0	0.000586559	0	0	0	0	0	0	0	0	1.4664e-05	0	3.08715e-05
Streptococcus sp. oral taxon 423 nov 94.37%	0	0	0	0	0	0	0	0	0	0.000586235	0	0	0	0	0	0	0	0	0	0	0	0	0	0	0	0	0	0	0	0	0	0	0	0	0	0	0	0	0	0	1.46559e-05	2.93117e-05	0
Citrobacter youngae	0	0	0	0	0	0	0	0	0	0.000586235	0	0	0	0	0	0	0	0	0	0	0	0	0	0	0	0	0	0	0	0	0	0	0	0	0	0	0	0	0	0	1.46559e-05	2.93117e-05	0
Acinetobacter seohaensis	0	0	0	0	0	0	0.000395218	0	0	0	0	0	0	0	0	0	0	0	0	0	0.000189735	0	0	0	0	0	0	0	0	0	0	0	0	0	0	0	0	0	0	0	1.46238e-05	1.97609e-05	0
Achromobacter xylosoxidans	0	0	0	0	0	0	0	0	0.000462963	0	0	0	0	5.92e-05	0	0	0	5.86e-05	0	0	0	0	0	0	0	0	0	0	0	0	0	0	0	0	0	0	0	0	0	0	1.45191e-05	2.90381e-05	0
Prevotella sp. oral taxon 475 nov 97.96%	0	0	0	0	0	0	0	0	0	0	0	0.000580383	0	0	0	0	0	0	0	0	0	0	0	0	0	0	0	0	0	0	0	0	0	0	0	0	0	0	0	0	1.45096e-05	2.90191e-05	0
Acinetobacter sp. str. DR1	0	0	0	0	0	0	0	0	0	0	0	0	0	0	5.42e-05	0	0	0	0	0	0.000189735	0	0	0	0	0	0	0	0	0	0	0.000335177	0	0	0	0	0	0	0	0	1.44778e-05	2.71e-06	1.76409e-05
Flavitalea sp. oral taxon 320 nov 87.53%	0	0	0	0.000571714	0	0	0	0	0	0	0	0	0	0	0	0	0	0	0	0	0	0	0	0	0	0	0	0	0	0	0	0	0	0	0	0	0	0	0	0	1.42928e-05	2.85857e-05	0
Campylobacter showae nov 93.16%	0	0	0	0	0	0	0	0	0	0	0	0	0	0	0	0	0	0	0	0	0	0	0	0	0	0.000562667	0	0	0	0	0	0	0	0	0	0	0	0	0	0	1.40667e-05	0	2.96141e-05
TM7 [G-1] sp. oral taxon 348 nov 96.02%	0	0	0	0	0	0	0	0	0	0	0	0	0	0	0	0	0	0	0	0	0	0	0	0	0	0.000562667	0	0	0	0	0	0	0	0	0	0	0	0	0	0	1.40667e-05	0	2.96141e-05
Treponema amylovorum nov 97.98%	0	0	0	0	0	0	0	0	0	0	0.000560433	0	0	0	0	0	0	0	0	0	0	0	0	0	0	0	0	0	0	0	0	0	0	0	0	0	0	0	0	0	1.40108e-05	2.80217e-05	0
Brevundimonas diminuta Oral Taxon D38	0	0	0	0.000357322	0	0	0	0	0.000198413	0	0	0	0	0	0	0	0	0	0	0	0	0	0	0	0	0	0	0	0	0	0	0	0	0	0	0	0	0	0	0	1.38934e-05	2.77867e-05	0
Porphyromonas multispecies sppn1 2 nov 97.76%	0	0	0	0	0	0	0	0	0	0	0	0	0	0	0.00032508	0	0	0	0	0	0	0	0	0	0	0	0	0	0	0	0	0	0.000102717	0	0	0.000124984	0	0	0	0	1.38195e-05	1.6254e-05	1.19843e-05
Corynebacterium accolens	0	0	0	0.000357322	0	0	0	0	0	0	0	0	0	0	0	0	0	0	0	0	0	0	0	0	0	0	0	0	0.000103466	0	0	8.38e-05	0	0	0	0	0	0	0	0	1.36147e-05	1.78661e-05	9.85611e-06
Corynebacterium pseudodiphtheriticum	0	0	0	0	0	0	0	0	0	0	0	0	0.000544129	0	0	0	0	0	0	0	0	0	0	0	0	0	0	0	0	0	0	0	0	0	0	0	0	0	0	0	1.36032e-05	2.72064e-05	0
Actinomyces cardiffensis	0	0	0	0	0	0	0	0	0	0	0	0	0	0	0	0	0	0	0	0	0	0	0	0	0	0	0	0	0	0	0	0	0	0.000148644	0.000394348	0	0	0	0	0	1.35748e-05	0	2.85785e-05
Bacteroidetes [G-3] sp. oral taxon 280 nov 81.64%	0	0	0	0	0	0	0	0	0.000132275	0	0	0	0	0	0	0	0	0.000410124	0	0	0	0	0	0	0	0	0	0	0	0	0	0	0	0	0	0	0	0	0	0	1.356e-05	2.712e-05	0
Treponema sp. oral taxon 270	0	0	0.000160849	0	0	0	0	0	0.000198413	0	0	0	0	0	0	0	0	0.000117178	0	0	0	0	0	0	0	0	0	0	0	0	0	0	0	0	6.57e-05	0	0	0	0	0	1.35535e-05	2.3822e-05	3.45789e-06
Propionibacterium acidifaciens	0	0	0	0	0	0	0	0	0.000198413	0	0	0	0	0	0	0	0	0	0	0	0	0	0	0	0	0	0	0	0	0	0	0	0	0	0	0	0	0	0.000337268	0	1.3392e-05	9.92065e-06	1.77509e-05
Bacteroidetes [G-5] sp. oral taxon 507 nov 78.05%	0	0	0	0	0	0	0	0	0	0	0	0	0	0	0	0	0	0.000527303	0	0	0	0	0	0	0	0	0	0	0	0	0	0	0	0	0	0	0	0	0	0	1.31826e-05	2.63651e-05	0
Corynebacterium argentoratense	0	0	0	0	0	0	0	0	0	0	0	0	0	0	0	0	0	0	0	0	0	0	0	0	0	0	0	0	0	0	0	0	0	0	0.000525797	0	0	0	0	0	1.31449e-05	0	2.76735e-05
Selenomonas sp. oral taxon 479 nov 97.83%	0	0	0	0	0	0	0	0	0	0	0	0	0	0	0	0	0	0	0	0	0	0	0	0	0	0	0	0	0	0	0	0	0	0	0.000525797	0	0	0	0	0	1.31449e-05	0	2.76735e-05
Granulicatella adiacens nov 95.99%	0	0	0	0	0	0	0	0	0	0	0	0	0	0	0	0	0	0	0	0	0	0	0.000128353	0	0	0	0	0	0.000103466	0.00010321	0	0	0	7.43e-05	0	0	0	0	0	0.000105899	1.28807e-05	0	2.71173e-05
Campylobacter sp. oral taxon 044 nov 96.98%	0	0	0	0	0.000512601	0	0	0	0	0	0	0	0	0	0	0	0	0	0	0	0	0	0	0	0	0	0	0	0	0	0	0	0	0	0	0	0	0	0	0	1.2815e-05	2.56301e-05	0
Parvimonas micra nov 97.70%	0	0	0	0	0.000170867	0	0	0	0	0	0	0	0	0	0	0	0	0	0.000341297	0	0	0	0	0	0	0	0	0	0	0	0	0	0	0	0	0	0	0	0	0	1.28041e-05	2.56082e-05	0
Janibacter indicus	0.000107521	0	8.04e-05	0	0	0.000322754	0	0	0	0	0	0	0	0	0	0	0	0	0	0	0	0	0	0	0	0	0	0	0	0	0	0	0	0	0	0	0	0	0	0	1.27669e-05	2.55338e-05	0
Arcanobacterium haemolyticum	0	0	0	0	0	0	0	0	0	0	0.000435893	7.25e-05	0	0	0	0	0	0	0	0	0	0	0	0	0	0	0	0	0	0	0	0	0	0	0	0	0	0	0	0	1.27098e-05	2.54196e-05	0
Neisseria flavescens|subflava nov 91.57%	0	0	0	0	0	0	0	0	0	0	0	0	0	0	0	0	0	0	0	0	0	0	0.000256706	0	0	0	0	0	0	0	0	0	0	0	0	0.000249969	0	0	0	0	1.26669e-05	0	2.66671e-05
Capnocytophaga sp. oral taxon 323	0	0	0	0	0	0	0	0	0	0	0	0	0	0	0	0	0	0	5.69e-05	0	0	0	0	0	0	0	0	0	0	0	0	0	0	0	0	0	0	0	0.000449691	0	1.26648e-05	2.845e-06	2.36679e-05
Sphingomonas sanguinis	0	0	0	0	0	0	0	0	0	0	0	0	0	0	0	0.000506549	0	0	0	0	0	0	0	0	0	0	0	0	0	0	0	0	0	0	0	0	0	0	0	0	1.26637e-05	2.53275e-05	0
Aeromonas taiwanensis	0	0	0	0	0	0	0	0	0	0	0	0	0	0	0	0.000506549	0	0	0	0	0	0	0	0	0	0	0	0	0	0	0	0	0	0	0	0	0	0	0	0	1.26637e-05	2.53275e-05	0
Dermabacter hominis	0	0	0	0	0	0	0	0	0	0	0	0	0	0	0	0	0	0	0	0	0	0	0	0	0	0	0	0	0	0	0	0.000502765	0	0	0	0	0	0	0	0	1.25691e-05	0	2.64613e-05
Pedobacter sp. oral taxon 321 nov 78.53%	0	0	0	0	0	0	0	0	0	0	0	0	0	0	0	0	0	0	0	0	0	0	0	0	0	0	0	0	0	0	0	0.000502765	0	0	0	0	0	0	0	0	1.25691e-05	0	2.64613e-05
Brevundimonas diminuta	0	0	0	0	0	0	0	0	0	0	0	0	0	0	0	0	0	0	0	0	0	0	0	0	0	0	0	0	0	0	0	0.000502765	0	0	0	0	0	0	0	0	1.25691e-05	0	2.64613e-05
Leptothrix sp. oral taxon 025 nov 95.28%	0	0	0	0	0	0	0	0	0	0	0	0	0	0	0	0	0	0	0	0	0	0	0	0	0	0	0	0	0	0	0	0.000502765	0	0	0	0	0	0	0	0	1.25691e-05	0	2.64613e-05
Haemophilus haemolyticus nov 97.76%	0	0	0	0	0	0	0	0	0	0	0	0	0	0	0	0	0	0	0	0	0	0	0	0	0	0	0	0	0	0	0	0.000502765	0	0	0	0	0	0	0	0	1.25691e-05	0	2.64613e-05
Streptococcus sp. str. C300	0	0	0	0	0	0	0	0	0	0	0	0	0	0.000118357	0	0	0	0	0	0	0	0	0	4.92e-05	0	0	6.43e-05	0	0	0	0	0	0	7.43e-05	0	0	0	8.26e-05	0.000112423	0	1.25295e-05	5.91785e-06	2.01486e-05
TM7 [G-1] sp. oral taxon 347 nov 94.93%	0	0	0	0	0	0	0	0	0	0	0	0	0	0	0	0	0	0	0	0	0	0	0	0	0	0	0	0	0	0	0	0	0	0	0	0	0	0.000495622	0	0	1.23906e-05	0	2.60854e-05
Neisseria sp. oral taxon 523	0	0	0	0	0	0	0.000494022	0	0	0	0	0	0	0	0	0	0	0	0	0	0	0	0	0	0	0	0	0	0	0	0	0	0	0	0	0	0	0	0	0	1.23505e-05	2.47011e-05	0
Desulfotomaculum ruminis nov 80.72%	0	0	0	0	0	0	0	0	0	0	0	0	0	0	0	0	0	0	0	0	0	0	0	0	0	0.000492334	0	0	0	0	0	0	0	0	0	0	0	0	0	0	1.23083e-05	0	2.59123e-05
Treponema putidum	0	0	0	0	0	0	0	0	0.000198413	0	0	0	0	0	0	0	0	0.000292946	0	0	0	0	0	0	0	0	0	0	0	0	0	0	0	0	0	0	0	0	0	0	1.2284e-05	2.4568e-05	0
Treponema sp. oral taxon 237 nov 97.79%	0.000483845	0	0	0	0	0	0	0	0	0	0	0	0	0	0	0	0	0	0	0	0	0	0	0	0	0	0	0	0	0	0	0	0	0	0	0	0	0	0	0	1.20961e-05	2.41922e-05	0
Nesterenkonia rhizosphaerae	0	0	0.000482548	0	0	0	0	0	0	0	0	0	0	0	0	0	0	0	0	0	0	0	0	0	0	0	0	0	0	0	0	0	0	0	0	0	0	0	0	0	1.20637e-05	2.41274e-05	0
Massilia yuzhufengensis	0	0	0.000482548	0	0	0	0	0	0	0	0	0	0	0	0	0	0	0	0	0	0	0	0	0	0	0	0	0	0	0	0	0	0	0	0	0	0	0	0	0	1.20637e-05	2.41274e-05	0
Treponema sp. oral taxon 268	0	0	0	0	0	0	0	0	0	0	0.000124541	0	0	0	0	0	0.000285171	0	0	0	0	0	0	0	0	7.03e-05	0	0	0	0	0	0	0	0	0	0	0	0	0	0	1.20003e-05	2.04856e-05	3.7e-06
Capnocytophaga multispecies spp32 2	0.000376324	0	0	0	0	0	0	0	0	0	0	0	0	0	0	0	0	0	0	0	0	0	0	0	0	0	0	0	0	0	0	0	0.000102717	0	0	0	0	0	0	0	1.1976e-05	1.88162e-05	5.40616e-06
Prevotella melaninogenica nov 96.55%	0	0	0	0	0	0	0	0	0	0	0	0	0	0	0	0	0	0	0	0	0	0	0	0	0	0	0	0	0.000310398	0	0	0	0	0	0	6.25e-05	0	0	0	0.000105899	1.19699e-05	0	2.51998e-05
Capnocytophaga sputigena nov 97.29%	0	0	0	0	0	0	0	0	0	0	0	0	0	0	0	0	0	0	0	0	0	0	0	0	0.000475421	0	0	0	0	0	0	0	0	0	0	0	0	0	0	0	1.18855e-05	0	2.50222e-05
Schlegelella thermodepolymerans nov 89.02%	0	0	0	0	0	0	0	0	0	0	0	0	0	0	0	0	0.000475285	0	0	0	0	0	0	0	0	0	0	0	0	0	0	0	0	0	0	0	0	0	0	0	1.18821e-05	2.37642e-05	0
Streptococcus pyogenes	0	0	0	0	0	0	0	0	0	0	0	0	0	0.000473429	0	0	0	0	0	0	0	0	0	0	0	0	0	0	0	0	0	0	0	0	0	0	0	0	0	0	1.18357e-05	2.36714e-05	0
Gardnerella vaginalis	0	0	0	0	0	0	0	0	0	0	0	0	0	0	0	0	0	5.86e-05	0	0	0	0	0	0	0	0	0	0	0	0	0	0	0	0	0	0	0	0.000413018	0	0	1.17905e-05	2.93e-06	2.17378e-05
Escherichia coli nov 94.73%	0	0	0	0	0	0	0	0	0	0.000468988	0	0	0	0	0	0	0	0	0	0	0	0	0	0	0	0	0	0	0	0	0	0	0	0	0	0	0	0	0	0	1.17247e-05	2.34494e-05	0
Pseudoramibacter alactolyticus	0	0	0	0	0	0	0	0	0	0	0	0	0	0	0	0	0	0.000468713	0	0	0	0	0	0	0	0	0	0	0	0	0	0	0	0	0	0	0	0	0	0	1.17178e-05	2.34356e-05	0
Peptoniphilaceae [G-3] sp. oral taxon 929 nov 96.47%	0	0	0	0	0	0	0	0	0	0	0	0	0	0	0	0	0	0.000468713	0	0	0	0	0	0	0	0	0	0	0	0	0	0	0	0	0	0	0	0	0	0	1.17178e-05	2.34356e-05	0
multigenus multispecies sppn1 2 nov 86.12%	0	0	0	0	0	0	0	0	0	0	0	0	0	0	0	0	0	0.000468713	0	0	0	0	0	0	0	0	0	0	0	0	0	0	0	0	0	0	0	0	0	0	1.17178e-05	2.34356e-05	0
Lachnospiraceae [G-8] sp. oral taxon 500 nov 97.90%	0	0.000142086	0	0	0	0	0	0	0	0	0	0	0	0	0.00010836	0	0	0	0	0	0	0	0	0	0	0	0	0	0	0	0	0	0	0.000148644	6.57e-05	0	0	0	0	0	1.16198e-05	1.25223e-05	1.12813e-05
Treponema sp. oral taxon 256	0	0	0	0	0	0	0	0	0	0	0	0	0	0	0	0	0	0	0	0	0	0	0	0	0	0	0	0	0	0	0	0	0	0	0.000460072	0	0	0	0	0	1.15018e-05	0	2.42143e-05
Pseudomonas aeruginosa nov 94.44%	0	0	0	0	0	0	0	0	0	0.000234494	0	0	0	0	0	0.000217092	0	0	0	0	0	0	0	0	0	0	0	0	0	0	0	0	0	0	0	0	0	0	0	0	1.12897e-05	2.25793e-05	0
Olsenella sp. oral taxon 807	0	0	8.04e-05	0	0	0	0	0	6.61e-05	0	0	0	0.000163239	0	0	0	0	0	0	0	0	0	0	0	0	0.000140667	0	0	0	0	0	0	0	0	0	0	0	0	0	0	1.12601e-05	1.54869e-05	7.40353e-06
Microbacterium paraoxydans	0	0	0	0	0	0	0	0	0	0	0	0	0	0	0	0	0	0	0	0	0	0	0	0	0	0	0	0	0	0	0	0	0	0	0	0	0	0	0.000449691	0	1.12423e-05	0	2.36679e-05
Prevotella sp. oral taxon 820 nov 90.71%	0	0	0	0	0	0	0	0	0	0	0	0	0	0	0	0	0	0	0	0	0	0	0	0	0	0	0	0	0	0	0	0	0	0	0	0	0.000445633	0	0	0	1.11408e-05	0	2.34544e-05
Selenomonas artemidis	0	0	0	0	0	0	0	0	0	0	0	0	0	0	0	0	0	0	0	0	0	0	0	0	0	0.000140667	0	8.1e-05	0	0	0	0	0.000154075	0	6.57e-05	0	0	0	0	0	1.10361e-05	0	2.32338e-05
Kingella kingae nov 96.72%	0	0	0	0	0	0	0	0	0	0	0.000186811	0	0	0	0	0	0	0	0	0	0	0	0	0	0	0	0	0	0	0	0.000249314	0	0	0	0	0	0	0	0	0	1.09031e-05	9.34055e-06	1.31218e-05
Corynebacterium matruchotii nov 92.17%	0	0	0	0	0	0	0	0	0	0	0	0	0.000435303	0	0	0	0	0	0	0	0	0	0	0	0	0	0	0	0	0	0	0	0	0	0	0	0	0	0	0	1.08826e-05	2.17651e-05	0
Neisseria pharyngis nov 94.31%	0	0	0	0	0	0	0	0	0	0	0	0	0.000435303	0	0	0	0	0	0	0	0	0	0	0	0	0	0	0	0	0	0	0	0	0	0	0	0	0	0	0	1.08826e-05	2.17651e-05	0
Slackia exigua	0	0	0	0	0	0	0	0	6.61e-05	0	0	7.25e-05	0	0	0	0	0	5.86e-05	0	0	0	0	0	0	0	0	0	0	0	0	0	0.000167588	0	0	6.57e-05	0	0	0	0	0	1.07622e-05	9.86e-06	1.22783e-05
Deinococcus sp. Oral Taxon C45 nov 88.36%	0	0	0	0	0	0.000430339	0	0	0	0	0	0	0	0	0	0	0	0	0	0	0	0	0	0	0	0	0	0	0	0	0	0	0	0	0	0	0	0	0	0	1.07585e-05	2.1517e-05	0
Treponema multispecies spp3 2	0	0	0	0	0	0	0	0	0	0	0.000311352	0	0	0	0	0	0	0.000117178	0	0	0	0	0	0	0	0	0	0	0	0	0	0	0	0	0	0	0	0	0	0	1.07132e-05	2.14265e-05	0
Prevotella sp. oral taxon 820	0	0	0	0	0.000427168	0	0	0	0	0	0	0	0	0	0	0	0	0	0	0	0	0	0	0	0	0	0	0	0	0	0	0	0	0	0	0	0	0	0	0	1.06792e-05	2.13584e-05	0
Treponema multispecies spp31 2	0	0	0	0	0.000427168	0	0	0	0	0	0	0	0	0	0	0	0	0	0	0	0	0	0	0	0	0	0	0	0	0	0	0	0	0	0	0	0	0	0	0	1.06792e-05	2.13584e-05	0
Gemella bergeri	0	0.000426257	0	0	0	0	0	0	0	0	0	0	0	0	0	0	0	0	0	0	0	0	0	0	0	0	0	0	0	0	0	0	0	0	0	0	0	0	0	0	1.06564e-05	2.13129e-05	0
Prevotella buccae nov 89.47%	0	0	0	0	0	0	0	0	0	0	0	0	0	0	0	0	0	0	0	0	0	0	0	0	0	0.000422	0	0	0	0	0	0	0	0	0	0	0	0	0	0	1.055e-05	0	2.22105e-05
Lacnoclostridium sp. str. L2 50 nov 79.14%	0	0	0	0	0	0	0	0	0	0	0	0	0	0	0	0	0	0	0	0	0	0	0	0	0	0.000422	0	0	0	0	0	0	0	0	0	0	0	0	0	0	1.055e-05	0	2.22105e-05
Neisseria sp. oral taxon 018 nov 97.96%	0	0	0	0	0	0	0	4.11e-05	0	0	0	0	5.44e-05	0	0.00032508	0	0	0	0	0	0	0	0	0	0	0	0	0	0	0	0	0	0	0	0	0	0	0	0	0	1.05145e-05	2.1029e-05	0
Caulobacter sp. oral taxon 002 nov 84.62%	0	0	0	0	0	0	0	0	0	0	0	0	0	0	0	0	0	0	0	0	0	0	0	0	0	0	0	0	0	0	0	0.000418971	0	0	0	0	0	0	0	0	1.04743e-05	0	2.20511e-05
Paracoccus aminovorans	0	0	0	0	0	0	0	0	0	0	0	0	0	0	0	0	0	0	0	0	0	0	0	0	0	0	0	0	0	0	0	0.000418971	0	0	0	0	0	0	0	0	1.04743e-05	0	2.20511e-05
Sphingomonas elodea	0	0	0	0	0	0	0	0	0	0	0	0	0	0	0	0	0	0	0	0	0	0	0	0	0	0	0	0	0	0	0	0.000418971	0	0	0	0	0	0	0	0	1.04743e-05	0	2.20511e-05
Aeromonas multispecies spp44 3	5.38e-05	0	0	0	0	0	0	0	0	0	0	0	0	0	0	0.000361821	0	0	0	0	0	0	0	0	0	0	0	0	0	0	0	0	0	0	0	0	0	0	0	0	1.03905e-05	2.0781e-05	0
Ruminococcaceae [G-2] sp. oral taxon 085 nov 83.85%	0	0	0	0	0	0	0	0	0	0	0	0	0	0	0	0	0	0	0	0	0	0	0	0	0	0	0	0	0	0	0	0	0.000410867	0	0	0	0	0	0	0	1.02717e-05	0	2.16246e-05
Prevotella oralis	0	0	0	0	0	0	0	0.000123244	0	0	0	0	0	0	0	0	0	0	0	0	0	0	0	0	0	0	0	0	0	0	0	0	0	7.43e-05	0	0	0	0	0	0.000211797	1.02335e-05	6.1622e-06	1.50577e-05
Alloscardovia omnicolens nov 92.83%	0	0	0	0	0	0	0	0	0	0	0	0.000145096	0	0	0	0	0	0	0	0	0	0	0	0	0	0	0.000257119	0	0	0	0	0	0	0	0	0	0	0	0	0	1.00554e-05	7.2548e-06	1.35326e-05
Campylobacter concisus nov 97.61%	0	0	0	0	0	0	0	0	0	0	0	0	0	0	0	0	0.000190114	0	0	0	0	0	0	0	0	0	0	0	0	0	0	0	0	0	0	0	0	0	0	0.000211797	1.00478e-05	9.5057e-06	1.11472e-05
Stomatobaculum multispecies spp12 2	0	0	0	0	0	0	0	0	0	0	0	0	0	0	0	0	0	0	0	0	0	0	0	0	0	0	0	0	0	0	0	0	0	0.000148644	0	0.000249969	0	0	0	0	9.96533e-06	0	2.09796e-05
Bacteroidaceae [G-1] sp. oral taxon 272	0	0	0	0	0	0	0	0	0.000132275	0	0	0	0	0	0	0	0	0.000117178	0	0	0	0	0	0	0	0	0	0	0	0	0	0	0	0	6.57e-05	0	0	8.26e-05	0	0	9.94382e-06	1.24726e-05	7.80526e-06
Pseudomonas sp. Oral Taxon C61	0.000161282	0	0	0	0	0	0	0	0	0	0	0	0	0	0	0	0	0.000234357	0	0	0	0	0	0	0	0	0	0	0	0	0	0	0	0	0	0	0	0	0	0	9.89098e-06	1.9782e-05	0
Rheinheimera mesophila	0	0	0	0	0	0	0.000395218	0	0	0	0	0	0	0	0	0	0	0	0	0	0	0	0	0	0	0	0	0	0	0	0	0	0	0	0	0	0	0	0	0	9.88045e-06	1.97609e-05	0
Bacteroidetes [G-3] sp. oral taxon 503	0	0	0	0	0	0	0	0	0	0	0	0	0	0	0	0	0	0	0	0	0	0	0	0	0	0	0	0	0	0	0	0	0	0	0.000394348	0	0	0	0	0	9.8587e-06	0	2.07552e-05
Veillonella sp. oral taxon 780 nov 97.44%	0	0	0	0	0	0	0	0	0	0	0	0	0	0	0	0	0	0	0	0	0	0	0	0	0	0	0	0	0	0	0	0	0	0	0.000394348	0	0	0	0	0	9.8587e-06	0	2.07552e-05
Fusobacterium nucleatum subsp. polymorphum nov 97.36%	0	0	0	0	0	0	0	0	0	0	0	0	0	0	0	0	0	0	0	0	0	0	0	0	0	0	0	0	0	0	0	0	0	0	0.000394348	0	0	0	0	0	9.8587e-06	0	2.07552e-05
Prevotella aurantiaca nov 85.25%	0	0	0	0	0	0	0	0	0	0	0.000249082	0.000145096	0	0	0	0	0	0	0	0	0	0	0	0	0	0	0	0	0	0	0	0	0	0	0	0	0	0	0	0	9.85445e-06	1.97089e-05	0
Actinomyces naeslundii	0	0	0	0	0	0	0	0	6.61e-05	0	0	0	0.000163239	0	0	0	0	0	0	0	0	0	0	0	0	0	0	0	0	0	0	0	5.14e-05	0	0	0	0	0	0.000112423	0	9.82905e-06	1.1467e-05	8.62226e-06
Anaerococcus lactolyticus nov 91.06%	0	0	0	0	0	0	0	0	0	0	0	7.25e-05	0	0	0	0	0	0	0	0	0	0	0	0	0	0	0	0	0	0	0	0.000167588	0	0	0	0	0.000148544	0	0	0	9.7158e-06	3.625e-06	1.66385e-05
Olsenella uli	0	0	8.04e-05	0	0	0	0	0	0	0.000117247	0	0	0	0	0	0	0	0.000117178	0	0	0	0	0	0	0	0	0	0	0	0	0	0	0	0	6.57e-05	0	0	0	0	0	9.51313e-06	1.57413e-05	3.45789e-06
Lachnoanaerobaculum sp. oral taxon 083	0	0	0	0	0	0	0	0	0	0	0	0	0	0	0	0	0	0	0	0	0	0	0	0	0.000380337	0	0	0	0	0	0	0	0	0	0	0	0	0	0	0	9.50843e-06	0	2.00177e-05
Lactobacillus salivarius	0	0	0	0	0	0.000107585	0.000197609	0	0	0	0	0	0	0	0	7.24e-05	0	0	0	0	0	0	0	0	0	0	0	0	0	0	0	0	0	0	0	0	0	0	0	0	9.43985e-06	1.88797e-05	0
Capnocytophaga sp. oral taxon 902	0	0	0	0	0	0	0	0	0	0	0	0	0	0	0	0	0	0	0	0	0.000189735	0	0	0	0	0	0	0	0	0	0	0	0	0	0	0.000187477	0	0	0	0	9.4303e-06	0	9.86721e-06
Streptococcus dentisani nov 97.76%	0	0	0	0	0	0	0	0	0	0	0	0	0	0	0	0	0	0	0	0	0	0	0	0	0	0	0	0	0	0	0	0	0	0	0	0.000374953	0	0	0	0	9.37382e-06	0	1.97344e-05
Erysipelotrichaceae [G-1] sp. oral taxon 905	0	0	0	0	0	0	0	0	0.000198413	0	0	0	0	0	0	0	0	0.000175768	0	0	0	0	0	0	0	0	0	0	0	0	0	0	0	0	0	0	0	0	0	0	9.35453e-06	1.87091e-05	0
Butyrivibrio sp. oral taxon 080	0	0	0	0	8.54e-05	0	0	0	0	0	0	0	0	0	5.42e-05	0	0	0.000234357	0	0	0	0	0	0	0	0	0	0	0	0	0	0	0	0	0	0	0	0	0	0	9.34892e-06	1.86978e-05	0
Selenomonas sp. oral taxon 149	0	0	0	0	0	0	0	0	0	0	0.000373622	0	0	0	0	0	0	0	0	0	0	0	0	0	0	0	0	0	0	0	0	0	0	0	0	0	0	0	0	0	9.34055e-06	1.86811e-05	0
Treponema multispecies spp22 2	0	0	0	0	0	0	0	0	0	0	0.000373622	0	0	0	0	0	0	0	0	0	0	0	0	0	0	0	0	0	0	0	0	0	0	0	0	0	0	0	0	0	9.34055e-06	1.86811e-05	0
Propionibacterium sp. oral taxon 192 nov 95.93%	0	0	0	0	0	0	0	0	0	0	0	0	0	0	0	0	0	0	0	0	0	0	0	0	0	0	0	0	0	0	0	0	0	0	0	0	0.000371361	0	0	0	9.28402e-06	0	1.95453e-05
Leptotrichia sp. oral taxon 215 nov 95.88%	0	0	0	0	0	0	0	0	0	0	0	0	0	0	0	0	0	0	0	0	0	0	0	0	0	0	0	0	0	0	0	0	0	0	0	0	0.000371361	0	0	0	9.28402e-06	0	1.95453e-05
Prevotella sp. oral taxon 309	0	0	0.000241274	0	0	0	0	0	0	0	0	0	0	0	0	0	0	0	0	0	0	0	0.000128353	0	0	0	0	0	0	0	0	0	0	0	0	0	0	0	0	0	9.24067e-06	1.20637e-05	6.75542e-06
Streptococcus multispecies spp11 2	0	0	0	0	0	0	0	0	0	0	0	0	0	0	0	0	0	0	0	0	0	0	0	0	0	0	0	0	0	0	0	0	0.000102717	0	0.000262898	0	0	0	0	0	9.14037e-06	0	1.92429e-05
Prevotella disiens	0	0	0	0	0	0	0	0	0	0	0	0	0	0	0	0	0	0.000117178	0	0	0	0	0	0	0	0	0	0	0	0	0	0	0	0	0	0	0	0.000247811	0	0	9.12473e-06	5.8589e-06	1.30427e-05
Leptotrichia sp. oral taxon 909 nov 96.09%	0	0	0	0	0	0	0	0	0	0	0	0	0	0	0	0	0	0	0	0	0	0	0	0	0	0.000140667	0	0	0	0	0	0	0	0.000222965	0	0	0	0	0	0	9.0908e-06	0	1.91385e-05
Kocuria sp. oral taxon 189 nov 96.82%	0	0	0	0.000357322	0	0	0	0	0	0	0	0	0	0	0	0	0	0	0	0	0	0	0	0	0	0	0	0	0	0	0	0	0	0	0	0	0	0	0	0	8.93305e-06	1.78661e-05	0
Sphingomonas echinoides	0	0	0	0	0	0	0	0	0	0	0	0	0	0	0	0	0	0.000292946	0	0	0	0	0	0	0	0	6.43e-05	0	0	0	0	0	0	0	0	0	0	0	0	0	8.93115e-06	1.46473e-05	3.38421e-06
Enterobacter sp. str. 638	0	0	0	0	0	0	0	0	0	0.000351741	0	0	0	0	0	0	0	0	0	0	0	0	0	0	0	0	0	0	0	0	0	0	0	0	0	0	0	0	0	0	8.79352e-06	1.7587e-05	0
Aggregatibacter sp. oral taxon 949 nov 97.15%	0	0	0	0	0	0	0	0	0	0	0	0	0	0	0	0	0	0	0	0	0	0	0	0	0	0.000351667	0	0	0	0	0	0	0	0	0	0	0	0	0	0	8.79168e-06	0	1.85088e-05
Prevotella sp. oral taxon 305 nov 93.52%	0	0	0	0	0	0	0	0	0	0	0	0	0	0	0	0	0	0.000351535	0	0	0	0	0	0	0	0	0	0	0	0	0	0	0	0	0	0	0	0	0	0	8.78838e-06	1.75768e-05	0
Massilia dura	0	0	0	0	0	0	0	0	0	0	0	0	0	0	0	0	0	0.000351535	0	0	0	0	0	0	0	0	0	0	0	0	0	0	0	0	0	0	0	0	0	0	8.78838e-06	1.75768e-05	0
Kingella sp. oral taxon 932	0	0	0	0	0	0	0	0	0	0	0	0	0	0	0	0	0	0	0	0	0	0	0	0	0	0	0	0.000243092	0.000103466	0	0	0	0	0	0	0	0	0	0	0	8.66395e-06	0	1.82399e-05
Bacteroidetes [G-5] sp. oral taxon 511 nov 96.08%	0	0	0	0	0.000341734	0	0	0	0	0	0	0	0	0	0	0	0	0	0	0	0	0	0	0	0	0	0	0	0	0	0	0	0	0	0	0	0	0	0	0	8.54335e-06	1.70867e-05	0
Porphyromonas sp. oral taxon 279 nov 87.03%	0	0	0	0	0.000341734	0	0	0	0	0	0	0	0	0	0	0	0	0	0	0	0	0	0	0	0	0	0	0	0	0	0	0	0	0	0	0	0	0	0	0	8.54335e-06	1.70867e-05	0
Mollicutes [G-1] sp. oral taxon 504 nov 97.93%	0	0	0	0	0.000341734	0	0	0	0	0	0	0	0	0	0	0	0	0	0	0	0	0	0	0	0	0	0	0	0	0	0	0	0	0	0	0	0	0	0	0	8.54335e-06	1.70867e-05	0
Lachnoanaerobaculum sp. oral taxon 089	0	0	0	0	0	0	0	0	0	0	0	0	0	0	0	0	0	0	0	0	0	0	0	0	0	0	0	0	0	0	0	0	0	0	0	0	0	0	0.000337268	0	8.4317e-06	0	1.77509e-05
Anaerococcus lactolyticus nov 92.28%	0	0	0	0	0	0	0	0	0	0	0	0	0	0	0	0	0	0	0	0	0	0	0	0	0	0	0	0	0	0	0	0	0	0	0	0	0	0	0.000337268	0	8.4317e-06	0	1.77509e-05
Gordonia aichiensis Oral Taxon D37	0	0	0	0	0	0	0	0	0	0	0	0	0	0	0	0	0	0	0	0	0	0	0	0	0	0	0	0	0	0	0	0.000335177	0	0	0	0	0	0	0	0	8.37942e-06	0	1.76409e-05
Bergeyella sp. Oral Taxon H70	0	0	0	0	0	0	0	0	0	0	0	0	0	0	0	0	0	0	0	0	0	0	0	0	0	0	0	0	0	0	0	0.000335177	0	0	0	0	0	0	0	0	8.37942e-06	0	1.76409e-05
Bergeyella sp. oral taxon 422 nov 86.42%	0	0	0	0	0	0	0	0	0	0	0	0	0	0	0	0	0	0	0	0	0	0	0	0	0	0	0	0	0	0	0	0.000335177	0	0	0	0	0	0	0	0	8.37942e-06	0	1.76409e-05
Paracoccus limosus	0	0	0	0	0	0	0	0	0	0	0	0	0	0	0	0	0	0	0	0	0	0	0	0	0	0	0	0	0	0	0	0.000335177	0	0	0	0	0	0	0	0	8.37942e-06	0	1.76409e-05
Capnocytophaga sp. Oral Taxon A48	0	0	0	0	0	0	0	0	0	0	0	0	0	0	0	0	0	0	0	0	0	0	0	0	0	0	0	0	0	0	0.000332419	0	0	0	0	0	0	0	0	0	8.31047e-06	0	1.74957e-05
Capnocytophaga sputigena nov 90.55%	0	0	0	0	0	0	0	0	0	0	0	0	0	0	0	0	0	0	0	0	0	0	0	0	0	0	0	0	0	0	0.000332419	0	0	0	0	0	0	0	0	0	8.31047e-06	0	1.74957e-05
Escherichia coli nov 87.40%	0	0	0	0	0	0	0	0	0	0	0	0	0	0	0	0	0	0	0	0	0	0	0	0	0	0	0	0	0	0	0.000332419	0	0	0	0	0	0	0	0	0	8.31047e-06	0	1.74957e-05
Allobaculum stercoricanis nov 78.47%	0	0	0	0	0	0	0	0	0	0	0	0	0	0	0	0	0	0	0	0	0	0	0	0	0	0	0	0	0.000206932	0	0	0	0	0	0	0.000124984	0	0	0	0	8.2979e-06	0	1.74693e-05
Treponema sp. oral taxon 242	0	0	0	0	0	0	0	0	0.000198413	0	0	0	0	0	0	0	0	0	0	0	0	0	0	0	0	0	0	0	0	0	0	0	0	0	0.000131449	0	0	0	0	0	8.24655e-06	9.92065e-06	6.91837e-06
Capnocytophaga haemolytica nov 97.92%	0	0	0	0	0	0	0	0	0	0	0	0	0	0	0	0	0	0	0	0	0	0	0	0	0	0	0	0	0	0	0	0	0	0	0.000328623	0	0	0	0	0	8.21557e-06	0	1.72959e-05
Helicobacter pylori nov 92.24%	0	0	0	0	0	0	0	0	0	0	0	0	0	0	0	0	0	0	0	0	0	0	0	0	0	0	0	0	0	0	0	0	0	0	0.000328623	0	0	0	0	0	8.21557e-06	0	1.72959e-05
Capnocytophaga leadbetteri nov 97.89%	0	0	0	0	0	0	0	0	0	0	0	0	0	0	0	0	0	0	0	0.000129338	0	0	0	0	0	0	0	0	0	0	0	0	0	0	0.000197174	0	0	0	0	0	8.1628e-06	6.4669e-06	1.03776e-05
Sphaerobacter thermophilus nov 82.53%	0	0	0	0	0	0	0	0	0	0	0	0	0.000326477	0	0	0	0	0	0	0	0	0	0	0	0	0	0	0	0	0	0	0	0	0	0	0	0	0	0	0	8.16192e-06	1.63238e-05	0
Deinococcus sp. Oral Taxon C45 nov 89.74%	0	0	0	0	0	0	0	0	0	0	0	0	0	0	0	0	0	0	0	0	0	0	0	0	0	0	0	0.000324123	0	0	0	0	0	0	0	0	0	0	0	0	8.10308e-06	0	1.70591e-05
Veillonella sp. oral taxon 780 nov 97.64%	0	0	0	0	0	0	0	0	0	0	0	0	0	0	0	0	0	0	0	0	0	0	0	0	0	0	0	0.000324123	0	0	0	0	0	0	0	0	0	0	0	0	8.10308e-06	0	1.70591e-05
Paracoccus yeei	0	0	0	0	0	0.000322754	0	0	0	0	0	0	0	0	0	0	0	0	0	0	0	0	0	0	0	0	0	0	0	0	0	0	0	0	0	0	0	0	0	0	8.06885e-06	1.61377e-05	0
Sphaerobacter thermophilus nov 84.42%	0.000322563	0	0	0	0	0	0	0	0	0	0	0	0	0	0	0	0	0	0	0	0	0	0	0	0	0	0	0	0	0	0	0	0	0	0	0	0	0	0	0	8.06407e-06	1.61281e-05	0
Novosphingobium pentaromativorans	0.000322563	0	0	0	0	0	0	0	0	0	0	0	0	0	0	0	0	0	0	0	0	0	0	0	0	0	0	0	0	0	0	0	0	0	0	0	0	0	0	0	8.06407e-06	1.61281e-05	0
Selenomonas sp. oral taxon 126	0	0	0	0	0.000256301	0	0	0	0	0	0	0	0	0	0	0	0	0	0	0	0	0	0	0	0	0	0	0	0	0	0	0	0	0	6.57e-05	0	0	0	0	0	8.05003e-06	1.28151e-05	3.45789e-06
Actinomyces lingnae [NVP] nov 94.85%	0	3.55e-05	0	0	0	0	0	0	0	0	0	0	0	0	0	0	0	0	0.000284414	0	0	0	0	0	0	0	0	0	0	0	0	0	0	0	0	0	0	0	0	0	7.99785e-06	1.59957e-05	0
Solobacterium moorei nov 97.10%	0	0	0	0	0	0	0	0	0	0	0	0	0	0	0	0	0	0	0	0	0	0	0	0	0	0	0.000192839	0	0	0	0	0	0	0	0	0.000124984	0	0	0	0	7.94557e-06	0	1.67275e-05
Prevotella salivae nov 96.33%	0	0	0	0	0	0	0	0	0	0	0	0	0	0	0	0	0	0	0	0	0	0	0	0	0	0	0	0	0	0	0	0	0	0	0	0	0	0	0	0.000317696	7.9424e-06	0	1.67208e-05
Prevotella sp. oral taxon 396	0	0	0	0	0	0	0	0	0	0	0	0	0	0	0	0	0	0	0	0	0	0	0	0	0	0	0	0	0	0	0	0	0	0	0	0	0	0	0	0.000317696	7.9424e-06	0	1.67208e-05
Cetobacterium ceti nov 82.83%	0	0	0	0	0	0	0	0	0	0	0	0	0	0	0	0	0	0	0	0	0	0	0	0	0	0	0	0	0	0	0	0	0	0	0	0	0	0	0	0.000317696	7.9424e-06	0	1.67208e-05
Leptotrichia sp. oral taxon 215 nov 92.27%	0	0	0	0	0	0	0	0	0	0	0	0	0	0	0	0	0	0	0	0	0	0	0	0	0	0	0	0	0	0	0	0	0	0	0	0	0	0	0	0.000317696	7.9424e-06	0	1.67208e-05
Flavitalea sp. oral taxon 320 nov 85.37%	0	7.1e-05	0	0	0	0	0	0.000246488	0	0	0	0	0	0	0	0	0	0	0	0	0	0	0	0	0	0	0	0	0	0	0	0	0	0	0	0	0	0	0	0	7.9372e-06	1.58744e-05	0
Leptotrichia sp. oral taxon 392 nov 97.84%	0	0	0	0	0	0	0	0	0	0	0.000311352	0	0	0	0	0	0	0	0	0	0	0	0	0	0	0	0	0	0	0	0	0	0	0	0	0	0	0	0	0	7.7838e-06	1.55676e-05	0
Leptotrichia sp. oral taxon 463 nov 97.84%	0	0	0	0	0	0	0	0	0	0	0.000311352	0	0	0	0	0	0	0	0	0	0	0	0	0	0	0	0	0	0	0	0	0	0	0	0	0	0	0	0	0	7.7838e-06	1.55676e-05	0
Tannerella sp. oral taxon 286 nov 95.33%	0	0	0	0	0	0	0	0	0	0	0	0	0	0	0	0	0	0	0	0	0	0	0	0	0	0	0	0	0	0	0	0	0.000308151	0	0	0	0	0	0	0	7.70378e-06	0	1.62185e-05
Leptotrichia multispecies spp16 2	0	0	0	0	0	0	0	0	0	0	0	0	0	0	0	0	0	0	0	0	0	0	0	0	0	0	0	0	0	0	0	0	0.000308151	0	0	0	0	0	0	0	7.70378e-06	0	1.62185e-05
Prevotella denticola nov 90.87%	0	0	0	0	0	0	0	0	0	0	0	0	0	0	0	0	0	0	0	0	0	0	0	0	0	0	0	0	0	0	0	0	0	0.000297287	0	0	0	0	0	0	7.43217e-06	0	1.56467e-05
Prevotella melaninogenica nov 97.16%	0	0	0	0	0	0	0	0	0	0	0	0	0	0	0	0	0	0	0	0	0	0	0	0	0	0	0	0	0	0	0	0	0	0.000297287	0	0	0	0	0	0	7.43217e-06	0	1.56467e-05
Pedobacter sp. oral taxon 321 nov 80.00%	0	0	0	0	0	0	0	0	0	0	0	0	0	0	0	0	0	0	0	0	0	0.000294031	0	0	0	0	0	0	0	0	0	0	0	0	0	0	0	0	0	0	7.35077e-06	0	1.54753e-05
Gemella haemolysans nov 95.42%	0	0	0	0	0	0	0	0	0	0	0	0	0	0	0	0	0	0	0	0	0	0.000294031	0	0	0	0	0	0	0	0	0	0	0	0	0	0	0	0	0	0	7.35077e-06	0	1.54753e-05
Peptoniphilaceae [G-3] sp. oral taxon 929 nov 95.45%	0	0	0	0	0	0	0	0	0	0	0	0	0	0	0	0	0	0.000292946	0	0	0	0	0	0	0	0	0	0	0	0	0	0	0	0	0	0	0	0	0	0	7.32365e-06	1.46473e-05	0
Peptostreptococcaceae [XI][G-3] sp. oral taxon 495	0	0	0	0	0	0	0	0	0	0	0	0	0	0	0	0	0	0.000292946	0	0	0	0	0	0	0	0	0	0	0	0	0	0	0	0	0	0	0	0	0	0	7.32365e-06	1.46473e-05	0
Peptostreptococcaceae [XI][G-3] sp. oral taxon 950	0	0	0	0	0	0	0	0	0	0	0	0	0	0	0	0	0	0.000292946	0	0	0	0	0	0	0	0	0	0	0	0	0	0	0	0	0	0	0	0	0	0	7.32365e-06	1.46473e-05	0
Peptostreptococcaceae [XI][G-4] sp. oral taxon 369 nov 89.53%	0	0	0	0	0	0	0	0	0	0	0	0	0	0	0	0	0	0.000292946	0	0	0	0	0	0	0	0	0	0	0	0	0	0	0	0	0	0	0	0	0	0	7.32365e-06	1.46473e-05	0
Treponema denticola nov 80.48%	0	0	0	0	0	0	0	0	0	0	0	0	0	0	0	0	0	0.000292946	0	0	0	0	0	0	0	0	0	0	0	0	0	0	0	0	0	0	0	0	0	0	7.32365e-06	1.46473e-05	0
Bergeyella sp. oral taxon 319 nov 81.16%	0	0	0	0	0	0	0	0	0	0	0	0	0	0	0	0	0	0	0	0	0	0	0	0	0	0	0	0	0	0	0.00016621	0	0	0	0	0.000124984	0	0	0	0	7.27985e-06	0	1.5326e-05
Treponema sp. oral taxon 257	0	0	0	0	0	0	0	0	0	0	0	0	0	0	0	0	0	0	0	0	0	0	0	0	0	0	0	0	0	0	0	0	0	0	6.57e-05	0	0	0	0.000224845	0	7.26363e-06	0	1.52918e-05
Sphingomonas multispecies spp38 3	0	0	0	0	0	0	0	0	0	0	0	0	0	0	0	0.000289457	0	0	0	0	0	0	0	0	0	0	0	0	0	0	0	0	0	0	0	0	0	0	0	0	7.23643e-06	1.44729e-05	0
Geodermatophilus poikilotrophus	0	0	0	0	0	0	0	0	0	0	0	0	0	0	0	0	0	0.000117178	0	0	0	0	0	0	0	0	0	0	0	0	0	0.000167588	0	0	0	0	0	0	0	0	7.11915e-06	5.8589e-06	8.82042e-06
Actinomyces sp. oral taxon 175 nov 97.96%	0	0	0	0	0	0	0	0	0	0	0	0	0	0	0	0	0	0	0	0	0	0	0	0	0	0	0	0	0	0	0	0.000167588	5.14e-05	0	6.57e-05	0	0	0	0	0	7.1172e-06	0	1.49836e-05
Chryseoglobus frigidaquae	0	0.000284172	0	0	0	0	0	0	0	0	0	0	0	0	0	0	0	0	0	0	0	0	0	0	0	0	0	0	0	0	0	0	0	0	0	0	0	0	0	0	7.1043e-06	1.42086e-05	0
Capnocytophaga sp. oral taxon 336 nov 97.71%	0	0	0	0	0	0	0	0	0	0	0	0	0	0	0	0	0	0	0	0	0	0	0	0	0	0.000281334	0	0	0	0	0	0	0	0	0	0	0	0	0	0	7.03335e-06	0	1.48071e-05
Renibacterium salmoninarum nov 87.14%	0	0	0	0	0	0	0	0	0	0	0	0	0	0	0	0	0	0	0	0	0	0	0.000128353	0.000147747	0	0	0	0	0	0	0	0	0	0	0	0	0	0	0	0	6.9025e-06	0	1.45316e-05
Prevotella sp. oral taxon 317 nov 97.97%	0	0	0	0	0	0	0	0	0	0	0	0	0.000272064	0	0	0	0	0	0	0	0	0	0	0	0	0	0	0	0	0	0	0	0	0	0	0	0	0	0	0	6.8016e-06	1.36032e-05	0
Bacteroidetes [G-6] sp. oral taxon 516	0	3.55e-05	0	0	0	0	0	0	0	0	0	0	0	0	0	0	0	0.000234357	0	0	0	0	0	0	0	0	0	0	0	0	0	0	0	0	0	0	0	0	0	0	6.74643e-06	1.34929e-05	0
Leptotrichia sp. AF189244.1	0	0	0	0	0	0	0	0	0	0	0	0	0	0	0	0	0	0	0	0	0	0	0	0	0	0	0	0	0	0.00010321	0	0	0	0	0	0	0	0.000165207	0	0	6.71043e-06	0	1.41272e-05
Alphaproteobacteria [G] sp. Oral Taxon A28 nov 84.48%	0	0	0	0	0	0	0	0	0.00026455	0	0	0	0	0	0	0	0	0	0	0	0	0	0	0	0	0	0	0	0	0	0	0	0	0	0	0	0	0	0	0	6.61375e-06	1.32275e-05	0
Sphingomonas echinoides nov 97.67%	0	0	0	0	0	0	0	0	0.00026455	0	0	0	0	0	0	0	0	0	0	0	0	0	0	0	0	0	0	0	0	0	0	0	0	0	0	0	0	0	0	0	6.61375e-06	1.32275e-05	0
Bifidobacterium longum	0	0	0	0	0	0	0	0	0	0	0	0	0.000108826	0	0	0	9.51e-05	5.86e-05	0	0	0	0	0	0	0	0	0	0	0	0	0	0	0	0	0	0	0	0	0	0	6.56315e-06	1.31263e-05	0
Actinomyces sp. oral taxon 877	0	0	0	0	0	0	0	0	0	0	0	0	0	0	0	0	0	0	0	0	0	0	0	0	0	0	0	0	0	0.00010321	0	0	0.000154075	0	0	0	0	0	0	0	6.43212e-06	0	1.35413e-05
Atopobium parvulum nov 96.79%	0	0	0	0	0	0	0	0	0	0	0	0	0	0	0	0	0	0	0	0	0	0	0	0	0	0	0.000257119	0	0	0	0	0	0	0	0	0	0	0	0	0	6.42798e-06	0	1.35326e-05
Leptotrichia multispecies spp35 2	0	0	0	0	0	0	0	0	0	0	0	0	0	0	0	0	0	0	0	0	0	0	0	0	0	0	0	0	0	0	0	0	0.000256792	0	0	0	0	0	0	0	6.4198e-06	0	1.35154e-05
Granulicatella adiacens nov 96.98%	0	0	0	0	0	0	0	0	0	0	0	0	0	0	0	0	0	0	0	0	0	0	0.000256706	0	0	0	0	0	0	0	0	0	0	0	0	0	0	0	0	0	6.41765e-06	0	1.35108e-05
Treponema sp. oral taxon 230 nov 97.96%	0	0	0	0	0.000256301	0	0	0	0	0	0	0	0	0	0	0	0	0	0	0	0	0	0	0	0	0	0	0	0	0	0	0	0	0	0	0	0	0	0	0	6.40753e-06	1.28151e-05	0
Veillonellaceae [G-1] sp. oral taxon 145	0	0	0	0	0	0	0	0	0	0	0	0	0	0	0	0	0	5.86e-05	0	0	0	0	0	0	0	0	0	0	0	0	0	0	0	0	0.000197174	0	0	0	0	0	6.39435e-06	2.93e-06	1.03776e-05
Rothia mucilaginosa nov 82.88%	0	0	0	0	0	0	0	0	0	0	0	0	0	0	0	0	0	0	0	0	0	0	0	0	0	0	0	0	0.000103466	0	0	0	0	0.000148644	0	0	0	0	0	0	6.30275e-06	0	1.32689e-05
Staphylococcus auricularis	0	0	0	0	0	0	0	0	0	0	0	0	0	0	0	0	0	0	0	0	0	0	0	0	0	0	0	0	0	0	0	0.000251383	0	0	0	0	0	0	0	0	6.28457e-06	0	1.32307e-05
Stomatobaculum sp. oral taxon 910	0	0	0	0	0	0	0	0	0	0	0	0	0	0	0	0	0	0	0	0	0	0	0	0	0	0	0	0	0	0	0	0.000251383	0	0	0	0	0	0	0	0	6.28457e-06	0	1.32307e-05
Caulobacter sp. Oral Taxon C49	0	0	0	0	0	0	0	0	0	0	0	0	0	0	0	0	0	0	0	0	0	0	0	0	0	0	0	0	0	0	0	0.000251383	0	0	0	0	0	0	0	0	6.28457e-06	0	1.32307e-05
Acinetobacter baumannii nov 89.94%	0	0	0	0	0	0	0	0	0	0	0	0	0	0	0	0	0	0	0	0	0	0	0	0	0	0	0	0	0	0	0	0.000251383	0	0	0	0	0	0	0	0	6.28457e-06	0	1.32307e-05
Pseudomonas fluorescens	0	0	0	0	0	0	0	0	0	0	0	0	0	0	0	0	0	0	0	0	0	0	0	0	0	0	0	0	0	0	0	0.000251383	0	0	0	0	0	0	0	0	6.28457e-06	0	1.32307e-05
Rothia mucilaginosa nov 97.67%	0	0	0	0	0	0	0	0	0	0	0	0	0	0	0	0	0	0	0	4.31e-05	0	0	0	0	0	0	0	0	0	0	0	0	0	0	0	0.000124984	0	8.26e-05	0	0	6.2671e-06	2.155e-06	1.09255e-05
Treponema multispecies spp2 2	0	0	0	0	0	0	0	0	0	0	0.000249082	0	0	0	0	0	0	0	0	0	0	0	0	0	0	0	0	0	0	0	0	0	0	0	0	0	0	0	0	0	6.22705e-06	1.24541e-05	0
Prevotella enoeca nov 95.51%	0	0.00024865	0	0	0	0	0	0	0	0	0	0	0	0	0	0	0	0	0	0	0	0	0	0	0	0	0	0	0	0	0	0	0	0	0	0	0	0	0	0	6.21625e-06	1.24325e-05	0
Corynebacterium mucifaciens	0	0	0	0	0	0	0	0	0	0	0	0	0	0	0	0	0	0	0	0	0	0	0	0	0	0	0	0.000243092	0	0	0	0	0	0	0	0	0	0	0	0	6.0773e-06	0	1.27943e-05
Alloprevotella sp. oral taxon 914 nov 95.10%	0	0	0	0	0	0	0	0	0	0	0	0	0	0	0	0	0	0	0	0	0	0	0	0	0	0	0	0.000243092	0	0	0	0	0	0	0	0	0	0	0	0	6.0773e-06	0	1.27943e-05
Bergeyella sp. oral taxon 931 nov 91.67%	0	0	0	0	0	0	0	0	0	0	0	0	0	0	0	0	0	0	0	0	0	0	0	0	0	0	0	0.000243092	0	0	0	0	0	0	0	0	0	0	0	0	6.0773e-06	0	1.27943e-05
Aquabacterium olei	0	0	0	0	0	0	0	0	0	0	0	0	0	0	0	0	0	0	0	0	0	0	0	0	0	0	0	0.000243092	0	0	0	0	0	0	0	0	0	0	0	0	6.0773e-06	0	1.27943e-05
Brevibacterium ravenspurgense	0	0	0	0	0	0	0	0	0	0	0	0	0	0	0.00010836	0	0	0	0	0	0	0	0	0	0	0	0	0	0	0	0	0	0	0	0.000131449	0	0	0	0	0	5.99522e-06	5.418e-06	6.91837e-06
Aggregatibacter sp. oral taxon 512 nov 96.36%	0	0	0	0	0	0	0	0	0	0	0	0	0	0	0	0	0	0	0.000113766	0	0	0	0	0	0	0	0	0	0	0	0	0	0	0	0	0.000124984	0	0	0	0	5.96875e-06	5.6883e-06	6.57811e-06
Selenomonas sp. oral taxon 919	0	0.000106564	0	0	0	0	0	0	0	0	0	0	0	0	0	0	0	0	0	0	0	0	0	0	0	0	0	0	0	0	0	0	0	0	0.000131449	0	0	0	0	0	5.95033e-06	5.3282e-06	6.91837e-06
Corynebacterium sp. Oral Taxon A16	0	0	0	0	0	0	0	0	0	0	0	0	0	0	0	0	0	0	0	0	0	0	0	0	0	7.03e-05	0	0	0	0	0	0	0	0	0	0	0	0.000165207	0	0	5.88768e-06	0	1.23951e-05
Capnocytophaga sp. oral taxon 324	0	0	0	0	0	0	0	0	0	0	0	0	0	0	0	0	0	0	0	0	0	0	0	0	0	7.03e-05	0	0	0	0	0	0	0	0	0	0	0	0.000165207	0	0	5.88768e-06	0	1.23951e-05
Streptococcus mitis nov 96.76%	0	0	0	0	0	0	0	0	0	0.000234494	0	0	0	0	0	0	0	0	0	0	0	0	0	0	0	0	0	0	0	0	0	0	0	0	0	0	0	0	0	0	5.86235e-06	1.17247e-05	0
Salmonella multispecies spp40 2	0	0	0	0	0	0	0	0	0	0.000234494	0	0	0	0	0	0	0	0	0	0	0	0	0	0	0	0	0	0	0	0	0	0	0	0	0	0	0	0	0	0	5.86235e-06	1.17247e-05	0
Pseudomonas otitidis nov 80.63%	0	0	0	0	0	0	0	0	0	0.000234494	0	0	0	0	0	0	0	0	0	0	0	0	0	0	0	0	0	0	0	0	0	0	0	0	0	0	0	0	0	0	5.86235e-06	1.17247e-05	0
Bifidobacterium kashiwanohense	0	0	0	0	0	0	0	0	0	0	0	0	0	0	0	0	0	0.000234357	0	0	0	0	0	0	0	0	0	0	0	0	0	0	0	0	0	0	0	0	0	0	5.85892e-06	1.17178e-05	0
Peptostreptococcaceae [G] sp. Oral Taxon B17	0	0	0	0	0	0	0	0	0	0	0	0	0	0	0	0	0	0.000234357	0	0	0	0	0	0	0	0	0	0	0	0	0	0	0	0	0	0	0	0	0	0	5.85892e-06	1.17178e-05	0
Treponema multispecies spp4 4	0	0	0	0	0	0	0	0	0	0	0	0	0	0	0	0	0	0.000234357	0	0	0	0	0	0	0	0	0	0	0	0	0	0	0	0	0	0	0	0	0	0	5.85892e-06	1.17178e-05	0
Acinetobacter baumannii nov 96.09%	5.38e-05	0	0	0	0	0.000107585	0	0	0	0	0	7.25e-05	0	0	0	0	0	0	0	0	0	0	0	0	0	0	0	0	0	0	0	0	0	0	0	0	0	0	0	0	5.84713e-06	1.16943e-05	0
Selenomonas sp. oral taxon 126 nov 97.85%	0	0	0	0	0	0	0	0	0	0	0	0	0	0	0	0	0	0	0.000227531	0	0	0	0	0	0	0	0	0	0	0	0	0	0	0	0	0	0	0	0	0	5.68828e-06	1.13766e-05	0
Fusobacterium multispecies spp26 2	0	0	0	0	0	0	0	0	0	0	0	0	0	0	0	0	0	0	0.000227531	0	0	0	0	0	0	0	0	0	0	0	0	0	0	0	0	0	0	0	0	0	5.68828e-06	1.13766e-05	0
Bergeyella sp. oral taxon 422	0	0	0	0	0	0	0	0	0	0	0	0	0	0	0	0	0	5.86e-05	0	0	0	0	0	0	0	0	0	0	0	0	0	0.000167588	0	0	0	0	0	0	0	0	5.6547e-06	2.93e-06	8.82042e-06
Staphylococcus caprae	0	0	8.04e-05	7.15e-05	0	0	0	0	0	0	0	0	0	0	0	0	0	0	0	0	0	7.35e-05	0	0	0	0	0	0	0	0	0	0	0	0	0	0	0	0	0	0	5.635e-06	7.595e-06	3.86842e-06
Capnocytophaga granulosa nov 97.90%	0	0	0	0	0	0	0	0	0	0	0	0	0	0	0	0	0	0	0	0	0	0	0	0	0	0	0	0	0	0	0	0	0	0	0	0	0	0	0.000224845	0	5.62112e-06	0	1.18339e-05
Syntrophomonas bryantii nov 80.15%	0	0	0	0	0	0	0	0	0	0	0	0	0	0	0	0	0	0	0	0	0	0	0	0	0	0	0	0	0	0	0	0	0	0	0	0	0	0	0.000224845	0	5.62112e-06	0	1.18339e-05
Firmicutes [G] sp. Oral Taxon C68 nov 84.05%	0	0	0	0	0	0	0	0	0	0	0	0	0	0	0	0	0	0	0	0	0	0	0	0	0	0	0	0	0	0	0	0	0	0	0	0	0	0	0.000224845	0	5.62112e-06	0	1.18339e-05
Corynebacterium mucifaciens nov 91.68%	0	0	0	0	0	0	0	0	0	0	0	0	0	0	0	0	0	0	0	0	0	0	0	0	0	0	0	0	0	0	0	0	0	0	0	0	0.000222816	0	0	0	5.5704e-06	0	1.17272e-05
Brevundimonas diminuta nov 84.53%	0	0	0	0	0	0	0	0	0	0	0	0.000217644	0	0	0	0	0	0	0	0	0	0	0	0	0	0	0	0	0	0	0	0	0	0	0	0	0	0	0	0	5.4411e-06	1.08822e-05	0
Paracoccus chinensis	0	0	0	0	0	0	0	0	0	0	0	0.000217644	0	0	0	0	0	0	0	0	0	0	0	0	0	0	0	0	0	0	0	0	0	0	0	0	0	0	0	0	5.4411e-06	1.08822e-05	0
Ottowia sp. oral taxon 894 nov 95.25%	0	0	0	0	0	0	0	0	0	0	0	0	0	0	0.00021672	0	0	0	0	0	0	0	0	0	0	0	0	0	0	0	0	0	0	0	0	0	0	0	0	0	5.418e-06	1.0836e-05	0
Arthrobacter sp. str. FB24	0	0	0	0	0	0.000215169	0	0	0	0	0	0	0	0	0	0	0	0	0	0	0	0	0	0	0	0	0	0	0	0	0	0	0	0	0	0	0	0	0	0	5.37923e-06	1.07585e-05	0
Lactobacillus rhamnosus	0	0	0	0	0	0.000215169	0	0	0	0	0	0	0	0	0	0	0	0	0	0	0	0	0	0	0	0	0	0	0	0	0	0	0	0	0	0	0	0	0	0	5.37923e-06	1.07585e-05	0
Propionibacterium sp. oral taxon 915 nov 89.66%	0.000215042	0	0	0	0	0	0	0	0	0	0	0	0	0	0	0	0	0	0	0	0	0	0	0	0	0	0	0	0	0	0	0	0	0	0	0	0	0	0	0	5.37605e-06	1.07521e-05	0
Pedobacter sp. oral taxon 321 nov 87.30%	0	0	0	0.000214393	0	0	0	0	0	0	0	0	0	0	0	0	0	0	0	0	0	0	0	0	0	0	0	0	0	0	0	0	0	0	0	0	0	0	0	0	5.35982e-06	1.07196e-05	0
Sphingomonas sp. oral taxon 004 nov 94.02%	0	0	0	0.000214393	0	0	0	0	0	0	0	0	0	0	0	0	0	0	0	0	0	0	0	0	0	0	0	0	0	0	0	0	0	0	0	0	0	0	0	0	5.35982e-06	1.07196e-05	0
Selenomonas sp. oral taxon 137 nov 95.70%	0	0	0	0	0	0	0	8.22e-05	0	0	0	0	0	0	0	0	0	0	0	0	0	0	0	0	0	0	0	0	0	0	0	0	0	0	0.000131449	0	0	0	0	0	5.34122e-06	4.11e-06	6.91837e-06
Bacteroidetes [G-3] sp. oral taxon 365	0	0.000213129	0	0	0	0	0	0	0	0	0	0	0	0	0	0	0	0	0	0	0	0	0	0	0	0	0	0	0	0	0	0	0	0	0	0	0	0	0	0	5.32823e-06	1.06565e-05	0
Sphingomonas sp. Oral Taxon B65	0	0.000213129	0	0	0	0	0	0	0	0	0	0	0	0	0	0	0	0	0	0	0	0	0	0	0	0	0	0	0	0	0	0	0	0	0	0	0	0	0	0	5.32823e-06	1.06565e-05	0
Actinomyces sp. oral taxon 172 nov 96.10%	0	0	0	0	0	0	0	0	0	0	0	0	0	0	0	0	0	0	0	0	0	0	0	0	0	0	0	0	0	0	0	0	0	0	0	0	0	0	0	0.000211797	5.29492e-06	0	1.11472e-05
Coriobacterium glomerans nov 79.87%	0	0	0	0	0	0	0	0	0	0	0	0	0	0	0	0	0	0	0	0	0	0	0	0	0	0	0	0	0	0	0	0	0	0	0	0	0	0	0	0.000211797	5.29492e-06	0	1.11472e-05
Prevotella melaninogenica nov 97.36%	0	0	0	0	0	0	0	0	0	0	0	0	0	0	0	0	0	0	0	0	0	0	0	0	0	0	0	0	0	0	0	0	0	0	0	0	0	0	0	0.000211797	5.29492e-06	0	1.11472e-05
Prevotella multisaccharivorax nov 95.93%	0	0	0	0	0	0	0	0	0	0	0	0	0	0	0	0	0	0	0	0	0	0	0	0	0	0	0	0	0	0	0	0	0	0	0	0	0	0	0	0.000211797	5.29492e-06	0	1.11472e-05
Prevotella multispecies sppn1 2 nov 93.52%	0	0	0	0	0	0	0	0	0	0	0	0	0	0	0	0	0	0	0	0	0	0	0	0	0	0	0	0	0	0	0	0	0	0	0	0	0	0	0	0.000211797	5.29492e-06	0	1.11472e-05
Fusobacterium periodonticum nov 97.58%	0	0	0	0	0	0	0	0	0	0	0	0	0	0	0	0	0	0	0	0	0	0	0	0	0	0	0	0	0	0	0	0	0	0.000148644	0	6.25e-05	0	0	0	0	5.2786e-06	0	1.11128e-05
Capnocytophaga sp. oral taxon 336 nov 97.68%	0	0	0	0	0	0	0	0	0	0	0	0	0	0	0	0	0	0	0	0	0	0	0	0	0	0.000211	0	0	0	0	0	0	0	0	0	0	0	0	0	0	5.275e-06	0	1.11053e-05
TM7 [G-1] sp. oral taxon 869	0	0	0	0	0	0	0	0	0	0	0	0	0	0	0	0	0	0	0	0	0	0	0	0	0	0.000211	0	0	0	0	0	0	0	0	0	0	0	0	0	0	5.275e-06	0	1.11053e-05
Aggregatibacter aphrophilus	0	0	0	0	0	0	0	0	0	0	0	0	0	0	0	0	0	0	0	0	0	0	0	0	0	0	0	0	0	0	0	0	0.000102717	0	0	0	0	0	0	0.000105899	5.2154e-06	0	1.09798e-05
Selenomonas sp. oral taxon 136	0	0	0	0	0	0	9.88e-05	0	0	0	0	0	0	0	0	0	0	0	5.69e-05	0	0	0	0	0	0	0	0	0	0	0	0	0	5.14e-05	0	0	0	0	0	0	0	5.1775e-06	7.785e-06	2.70526e-06
Prevotella sp. oral taxon 314 nov 97.15%	0	0	0	0	0	0	0	0	0	0	0	0	0	0	0	0	0	0	0	0	0	0	0	0	0	0	0	0	0.000206932	0	0	0	0	0	0	0	0	0	0	0	5.1733e-06	0	1.08912e-05
Kingella sp. oral taxon 932 nov 96.75%	0	0	0	0	0	0	0	0	0	0	0	0	0	0	0	0	0	0	0	0	0	0	0	0	0	0	0	0	0.000206932	0	0	0	0	0	0	0	0	0	0	0	5.1733e-06	0	1.08912e-05
Propionibacterium sp. oral taxon 194	0	0	0	0	0	0	0	0	0	0	0	0	0	0	0	0	0	0	0	0	0	0	0	0	0	0	0	0	0	0.00020642	0	0	0	0	0	0	0	0	0	0	5.1605e-06	0	1.08642e-05
Aggregatibacter paraphrophilus nov 96.33%	0	0	0	0	0	0	0	0	0	0	0	0	0	0	0	0	0	0	0	0	0	0	0	0	0	0	0	0	0	0.00020642	0	0	0	0	0	0	0	0	0	0	5.1605e-06	0	1.08642e-05
Microbacterium trichothecenolyticum	0	0	0	0	0	0	0	0.000205406	0	0	0	0	0	0	0	0	0	0	0	0	0	0	0	0	0	0	0	0	0	0	0	0	0	0	0	0	0	0	0	0	5.13515e-06	1.02703e-05	0
Selenomonas sp. oral taxon 146	0	0	0	0	8.54e-05	0	0	0	0	0	0	0	0	0	0	0	0	0	0.000113766	0	0	0	0	0	0	0	0	0	0	0	0	0	0	0	0	0	0	0	0	0	4.97915e-06	9.9583e-06	0
Corynebacterium matruchotii nov 96.76%	0	0	0	0	0	0	0	0	0.000198413	0	0	0	0	0	0	0	0	0	0	0	0	0	0	0	0	0	0	0	0	0	0	0	0	0	0	0	0	0	0	0	4.96033e-06	9.92065e-06	0
Desulfovibrio sp. oral taxon 040 nov 93.17%	0	0	0	0	0	0	0	0	0.000198413	0	0	0	0	0	0	0	0	0	0	0	0	0	0	0	0	0	0	0	0	0	0	0	0	0	0	0	0	0	0	0	4.96033e-06	9.92065e-06	0
Streptococcus oligofermentans	0	0	0	0	0	0	0	0	0.000132275	0	0	0	0	0	0	0	0	0	0	0	0	0	0	0	0	0	0	0	0	0	0	0	0	0	0	6.25e-05	0	0	0	0	4.86938e-06	6.61375e-06	3.28947e-06
Parvimonas sp. oral taxon 110 nov 86.89%	0	0	0	0	0	0	0	0	0	0	0	0	0	0	0	0	0.000190114	0	0	0	0	0	0	0	0	0	0	0	0	0	0	0	0	0	0	0	0	0	0	0	4.75285e-06	9.5057e-06	0
Gemella haemolysans nov 97.99%	0	0	0	0	0	0	0	0	0	0	0	0	0	0	0	0	0	0	0	0	0.000189735	0	0	0	0	0	0	0	0	0	0	0	0	0	0	0	0	0	0	0	4.74338e-06	0	0
Veillonella sp. oral taxon 917 nov 90.93%	0	0	0	0	0	0	0	0	0	0	0	0	0	0	0	0	0	0	0	0	0.000189735	0	0	0	0	0	0	0	0	0	0	0	0	0	0	0	0	0	0	0	4.74338e-06	0	0
Bacillus anthracis nov 84.63%	0	0	0	0	0	0	0	0	0	0	0	0	0	0	0	0	0	0	0	0	0	0	0	0	0	0	0	0	0	0	0	0	0	0	0	0	0	8.26e-05	0	0.000105899	4.71248e-06	0	9.921e-06
Neisseria flavescens|subflava nov 96.12%	0	0	0	0	0	0	0	0	0	0	0	0	0	0	0	0	0	0	0	0	0	0	0	0	0	0	0	0	0	0	0	0	0	0	0	0.000187477	0	0	0	0	4.68693e-06	0	9.86721e-06
Actinomyces dentalis	0	0	0	0	0	0	0	0	0	0	0.000124541	0	0	0	0	0	0	0	0	0	0	0	0	0	0	0	0	0	0	0	0	0	0	0	0	6.25e-05	0	0	0	0	4.67603e-06	6.22705e-06	3.28947e-06
Bacteroidetes [G-5] sp. oral taxon 511 nov 86.71%	0	0	0	0	0	0	0	0	0	0	0.000186811	0	0	0	0	0	0	0	0	0	0	0	0	0	0	0	0	0	0	0	0	0	0	0	0	0	0	0	0	0	4.67027e-06	9.34055e-06	0
Peptoniphilaceae [G-1] sp. oral taxon 113	0	0	0	0	0	0	0	0	0	0	0.000186811	0	0	0	0	0	0	0	0	0	0	0	0	0	0	0	0	0	0	0	0	0	0	0	0	0	0	0	0	0	4.67027e-06	9.34055e-06	0
Peptostreptococcaceae [XI][G-2] sp. oral taxon 091 nov 96.89%	0	0	0	0	0	0	0	0	0	0	0.000186811	0	0	0	0	0	0	0	0	0	0	0	0	0	0	0	0	0	0	0	0	0	0	0	0	0	0	0	0	0	4.67027e-06	9.34055e-06	0
Campylobacter sp. oral taxon 044 nov 97.82%	0	0	0	0	0	0	0	0	0	0	0.000186811	0	0	0	0	0	0	0	0	0	0	0	0	0	0	0	0	0	0	0	0	0	0	0	0	0	0	0	0	0	4.67027e-06	9.34055e-06	0
Veillonellaceae [G-1] sp. oral taxon 129	0	0	8.04e-05	0	0	0	0	0	0	0	0	0	0	0	0	0	0	0	0	0	0	0	0	0	0	0	0	0	0	0	0	0	0	0	0	0	0	0	0	0.000105899	4.65748e-06	4.02e-06	5.57363e-06
Streptococcus multispecies spp15 2	0	0	0	0	0	0	0	0	0	0	0	0	0	0	0	0	0	0	0	0	0	0	0	0	0	0	0	0	0.000103466	0	0	0	0	0	0	0	0	8.26e-05	0	0	4.65165e-06	0	9.79295e-06
Rothia aeria nov 97.89%	0	0	0	0	0	0	0	0	0	0	0	0	0	0	0	0	0	0	0	0	0	7.35e-05	0	0	0	0	0	0	0	0	0	0	0	0	0	0	0	0	0.000112423	0	4.64808e-06	0	9.78542e-06
Sphingomonas sp. oral taxon 004 nov 80.40%	0	0	0	0	0	0	0	0	0	0	0	0	0	0.000118357	0	0	0	0	0	0	0	0	0	0	0	0	6.43e-05	0	0	0	0	0	0	0	0	0	0	0	0	0	4.56643e-06	5.91785e-06	3.38421e-06
Cryptobacterium curtum	0	0	0	0	0	0.000107585	0	0	0	0	0	0	0	0	0	0	0	0	0	0	0	0	0	0	0	0	0	0	0	0	0	0	0	7.43e-05	0	0	0	0	0	0	4.54713e-06	5.37925e-06	3.91053e-06
Neisseria flavescens|subflava nov 94.37%	0	0	0	0	0	0	0	0	0	0	0	0	0	0	0.00010836	0	0	0	0	0	0	0	0	0	0	7.03e-05	0	0	0	0	0	0	0	0	0	0	0	0	0	0	4.4665e-06	5.418e-06	3.7e-06
Porphyromonas somerae	0	0	0	0	0	0	0	0	0	0	0	0	0	0.000177536	0	0	0	0	0	0	0	0	0	0	0	0	0	0	0	0	0	0	0	0	0	0	0	0	0	0	4.4384e-06	8.8768e-06	0
Enterococcus casseliflavus	0	0	0	0	0	0	0	0	0	0	0	0	0	0.000177536	0	0	0	0	0	0	0	0	0	0	0	0	0	0	0	0	0	0	0	0	0	0	0	0	0	0	4.4384e-06	8.8768e-06	0
Bifidobacterium breve	0	0	0	0	0	0	0	0	0	0	0	0	0	0	0	0	0	0.000175768	0	0	0	0	0	0	0	0	0	0	0	0	0	0	0	0	0	0	0	0	0	0	4.3942e-06	8.7884e-06	0
Eggerthella lenta nov 86.92%	0	0	0	0	0	0	0	0	0	0	0	0	0	0	0	0	0	0.000175768	0	0	0	0	0	0	0	0	0	0	0	0	0	0	0	0	0	0	0	0	0	0	4.3942e-06	8.7884e-06	0
Oribacterium parvum nov 88.96%	0	0	0	0	0	0	0	0	0	0	0	0	0	0	0	0	0	0.000175768	0	0	0	0	0	0	0	0	0	0	0	0	0	0	0	0	0	0	0	0	0	0	4.3942e-06	8.7884e-06	0
Sneathia amnii [NVP]	0	0	0	0	0	0	0	0	0	0	0	0	0	0	0	0	0	0.000175768	0	0	0	0	0	0	0	0	0	0	0	0	0	0	0	0	0	0	0	0	0	0	4.3942e-06	8.7884e-06	0
Treponema sp. oral taxon 234 nov 83.43%	0	0	0	0	0	0	0	0	0	0	0	0	0	0	0	0	0	0.000175768	0	0	0	0	0	0	0	0	0	0	0	0	0	0	0	0	0	0	0	0	0	0	4.3942e-06	8.7884e-06	0
Capnocytophaga leadbetteri nov 97.88%	0	0	0	0	0	0	0	0	0	0	0	0	0	0	0	0	0	0	0	0.000172451	0	0	0	0	0	0	0	0	0	0	0	0	0	0	0	0	0	0	0	0	4.31128e-06	8.62255e-06	0
Clostridiales [F-1][G-1] sp. oral taxon 093 nov 82.26%	0	0	0	0	0.000170867	0	0	0	0	0	0	0	0	0	0	0	0	0	0	0	0	0	0	0	0	0	0	0	0	0	0	0	0	0	0	0	0	0	0	0	4.27168e-06	8.54335e-06	0
Clostridiales [F-1][G-1] sp. oral taxon 093 nov 97.62%	0	0	0	0	0.000170867	0	0	0	0	0	0	0	0	0	0	0	0	0	0	0	0	0	0	0	0	0	0	0	0	0	0	0	0	0	0	0	0	0	0	0	4.27168e-06	8.54335e-06	0
Cellulosilyticum lentocellum nov 76.02%	0	0	0	0	0.000170867	0	0	0	0	0	0	0	0	0	0	0	0	0	0	0	0	0	0	0	0	0	0	0	0	0	0	0	0	0	0	0	0	0	0	0	4.27168e-06	8.54335e-06	0
Lachnoanaerobaculum orale nov 84.65%	0	0	0	0	0.000170867	0	0	0	0	0	0	0	0	0	0	0	0	0	0	0	0	0	0	0	0	0	0	0	0	0	0	0	0	0	0	0	0	0	0	0	4.27168e-06	8.54335e-06	0
Oribacterium sp. oral taxon 102 nov 78.80%	0	0	0	0	0.000170867	0	0	0	0	0	0	0	0	0	0	0	0	0	0	0	0	0	0	0	0	0	0	0	0	0	0	0	0	0	0	0	0	0	0	0	4.27168e-06	8.54335e-06	0
Butyrivibrio crossotus nov 78.38%	0	0	0	0	0.000170867	0	0	0	0	0	0	0	0	0	0	0	0	0	0	0	0	0	0	0	0	0	0	0	0	0	0	0	0	0	0	0	0	0	0	0	4.27168e-06	8.54335e-06	0
Mogibacterium diversum nov 94.41%	0	0	0	0	0.000170867	0	0	0	0	0	0	0	0	0	0	0	0	0	0	0	0	0	0	0	0	0	0	0	0	0	0	0	0	0	0	0	0	0	0	0	4.27168e-06	8.54335e-06	0
Peptostreptococcus anaerobius nov 81.19%	0	0	0	0	0.000170867	0	0	0	0	0	0	0	0	0	0	0	0	0	0	0	0	0	0	0	0	0	0	0	0	0	0	0	0	0	0	0	0	0	0	0	4.27168e-06	8.54335e-06	0
Acetivibrio cellulolyticus nov 77.87%	0	0	0	0	0.000170867	0	0	0	0	0	0	0	0	0	0	0	0	0	0	0	0	0	0	0	0	0	0	0	0	0	0	0	0	0	0	0	0	0	0	0	4.27168e-06	8.54335e-06	0
Herbaspirillum sp. Oral Taxon A32 nov 76.88%	0	0	0	0	0.000170867	0	0	0	0	0	0	0	0	0	0	0	0	0	0	0	0	0	0	0	0	0	0	0	0	0	0	0	0	0	0	0	0	0	0	0	4.27168e-06	8.54335e-06	0
Fretibacterium fastidiosum nov 91.16%	0	0	0	0	0.000170867	0	0	0	0	0	0	0	0	0	0	0	0	0	0	0	0	0	0	0	0	0	0	0	0	0	0	0	0	0	0	0	0	0	0	0	4.27168e-06	8.54335e-06	0
Fretibacterium multispecies spp30 2	0	0	0	0	0.000170867	0	0	0	0	0	0	0	0	0	0	0	0	0	0	0	0	0	0	0	0	0	0	0	0	0	0	0	0	0	0	0	0	0	0	0	4.27168e-06	8.54335e-06	0
Firmicutes [G] sp. Oral Taxon C68 nov 85.95%	0	0	0	0	0	0	0	0	0	0	0	0	0	0	0	0	0	0	0.000170648	0	0	0	0	0	0	0	0	0	0	0	0	0	0	0	0	0	0	0	0	0	4.2662e-06	8.5324e-06	0
Microbacterium sp. Oral Taxon C11 nov 80.64%	0	0	0	0	0	0	0	0	0	0	0	0	0	0	0	0	0	0	0	0	0	0	0	0	0	0	6.43e-05	0	0	0	0	0	0	0	0	0	0	0	0	0.000105899	4.25497e-06	0	8.95784e-06
Treponema sp. oral taxon 253	0	0	0	0	0	0	0	0	0	0	0	0	0	0	0	0	0	0.000117178	0	0	0	0	0	0	0	0	0	0	0	0	0	0	5.14e-05	0	0	0	0	0	0	0	4.21445e-06	5.8589e-06	2.70526e-06
Bifidobacterium thermacidophilum	0	0	0	0	0	0	0	0	0	0	0	0	0	0	0	0	0	0	0	0	0	0	0	0	0	0	0	0	0	0	0	0.000167588	0	0	0	0	0	0	0	0	4.1897e-06	0	8.82042e-06
Prevotella copri	0	0	0	0	0	0	0	0	0	0	0	0	0	0	0	0	0	0	0	0	0	0	0	0	0	0	0	0	0	0	0	0.000167588	0	0	0	0	0	0	0	0	4.1897e-06	0	8.82042e-06
Rhodobacter capsulatus nov 89.37%	0	0	0	0	0	0	0	0	0	0	0	0	0	0	0	0	0	0	0	0	0	0	0	0	0	0	0	0	0	0	0	0.000167588	0	0	0	0	0	0	0	0	4.1897e-06	0	8.82042e-06
Castellaniella ginsengisoli	0	0	0	0	0	0	0	0	0	0	0	0	0	0	0	0	0	0	0	0	0	0	0	0	0	0	0	0	0	0	0	0.000167588	0	0	0	0	0	0	0	0	4.1897e-06	0	8.82042e-06
Cardiobacterium hominis nov 84.88%	0	0	0	0	0	0	0	0	0	0	0	0	0	0	0	0	0	0	0	0	0	0	0	0	0	0	0	0	0	0	0	0.000167588	0	0	0	0	0	0	0	0	4.1897e-06	0	8.82042e-06
Zymobacter palmae	0	0	0	0	0	0	0	0	0	0	0	0	0	0	0	0	0	0	0	0	0	0	0	0	0	0	0	0	0	0	0	0.000167588	0	0	0	0	0	0	0	0	4.1897e-06	0	8.82042e-06
Cryobacterium psychrophilum nov 80.04%	0	0	0	0	0	0	0	0	0	0	0	0	0	0	0	0	0	0	0	0	0	0	0	0	0	0	0	0	0	0	0.00016621	0	0	0	0	0	0	0	0	0	4.15525e-06	0	8.74789e-06
Dysgonomonas gadei nov 79.08%	0	0	0	0	0	0	0	0	0	0	0	0	0	0	0	0	0	0	0	0	0	0	0	0	0	0	0	0	0	0	0.00016621	0	0	0	0	0	0	0	0	0	4.15525e-06	0	8.74789e-06
Porphyromonas sp. oral taxon 279 nov 96.52%	0	0	0	0	0	0	0	0	0	0	0	0	0	0	0	0	0	0	0	0	0	0	0	0	0	0	0	0	0	0	0.00016621	0	0	0	0	0	0	0	0	0	4.15525e-06	0	8.74789e-06
Capnocytophaga gingivalis nov 97.48%	0	0	0	0	0	0	0	0	0	0	0	0	0	0	0	0	0	0	0	0	0	0	0	0	0	0	0	0	0	0	0.00016621	0	0	0	0	0	0	0	0	0	4.15525e-06	0	8.74789e-06
Bacillus anthracis nov 84.96%	0	0	0	0	0	0	0	0	0	0	0	0	0	0	0	0	0	0	0	0	0	0	0	0	0	0	0	0	0	0	0.00016621	0	0	0	0	0	0	0	0	0	4.15525e-06	0	8.74789e-06
Peptoclostridium tenue nov 78.65%	0	0	0	0	0	0	0	0	0	0	0	0	0	0	0	0	0	0	0	0	0	0	0	0	0	0	0	0	0	0	0.00016621	0	0	0	0	0	0	0	0	0	4.15525e-06	0	8.74789e-06
Neisseria flavescens|subflava nov 96.75%	0	0	0	0	0	0	0	0	0	0	0	0	0	0	0	0	0	0	0	0	0	0	0	0	0	0	0	0	0	0	0.00016621	0	0	0	0	0	0	0	0	0	4.15525e-06	0	8.74789e-06
Prevotella sp. oral taxon 313 nov 97.36%	0	0	0	0	0	0	0	0	0	0	0	0	0	0	0	0	0	0	0	0	0	0	0	0	0	0	0	0	0	0	0	0	0	0	0	0	0	0.000165207	0	0	4.13017e-06	0	8.69511e-06
Capnocytophaga granulosa nov 97.69%	0	0	0	0	0	0	0	0	0	0	0	0	0	0	0	0	0	0	0	0	0	0	0	0	0	0	0	0	0	0	0	0	0	0	0	0	0	0.000165207	0	0	4.13017e-06	0	8.69511e-06
Gemella sanguinis nov 93.61%	0	0	0	0	0	0	0	0	0	0	0	0	0	0	0	0	0	0	0	0	0	0	0	0	0	0	0	0	0	0	0	0	0	0	0	0	0	0.000165207	0	0	4.13017e-06	0	8.69511e-06
Aliicoccus persicus nov 81.28%	0	0	0	0	0	0	0	0	0	0	0	0	0	0	0	0	0	0	0	0	0	0	0	0	0	0	0	0	0	0	0	0	0	0	0	0	0	0.000165207	0	0	4.13017e-06	0	8.69511e-06
Mogibacterium timidum nov 92.34%	0	0	0	0	0	0	0	0	0	0	0	0	0	0	0	0	0	0	0	0	0	0	0	0	0	0	0	0	0	0	0	0	0	0	0	0	0	0.000165207	0	0	4.13017e-06	0	8.69511e-06
Ruminoclostridium alkalicellum nov 77.98%	0	0	0	0	0	0	0	0	0	0	0	0	0	0	0	0	0	0	0	0	0	0	0	0	0	0	0	0	0	0	0	0	0	0	0	0	0	0.000165207	0	0	4.13017e-06	0	8.69511e-06
Neisseria polysaccharea nov 93.89%	0	0	0	0	0	0	0	0	0	0	0	0	0	0	0	0	0	0	0	0	0	0	0	0	0	0	0	0	0	0	0	0	0	0	0	0	0	0.000165207	0	0	4.13017e-06	0	8.69511e-06
Actinomyces massiliensis	0	0	0	0	0	0	0	0	0	0	0	0	0	0	0	0	0	0	0	0	0	0	0	0	0	0	0	8.1e-05	0	0	0	8.38e-05	0	0	0	0	0	0	0	0	4.12e-06	0	8.67368e-06
Selenomonas sp. oral taxon 892 nov 97.46%	0	0	0	0	0	0	0	0	0	0	0	0	0.000163239	0	0	0	0	0	0	0	0	0	0	0	0	0	0	0	0	0	0	0	0	0	0	0	0	0	0	0	4.08098e-06	8.16195e-06	0
Lachnoanaerobaculum multispecies sppn1 2 nov 97.49%	0	0	0	0	0	0	0	0	0	0	0	0	0	0	0.00016254	0	0	0	0	0	0	0	0	0	0	0	0	0	0	0	0	0	0	0	0	0	0	0	0	0	4.0635e-06	8.127e-06	0
Corynebacterium variabile	0	0	0	0	0	0	0	0	0	0	0	0	0	0	0	0	0	0	0	0	0	0	0	0	0	0	0	0.000162061	0	0	0	0	0	0	0	0	0	0	0	0	4.05153e-06	0	8.52953e-06
Aquincola tertiaricarbonis	0.000161282	0	0	0	0	0	0	0	0	0	0	0	0	0	0	0	0	0	0	0	0	0	0	0	0	0	0	0	0	0	0	0	0	0	0	0	0	0	0	0	4.03205e-06	8.0641e-06	0
Prevotella sp. oral taxon 301	0	0	0.000160849	0	0	0	0	0	0	0	0	0	0	0	0	0	0	0	0	0	0	0	0	0	0	0	0	0	0	0	0	0	0	0	0	0	0	0	0	0	4.02122e-06	8.04245e-06	0
Caulobacter sp. oral taxon 002 nov 83.60%	0	0	0.000160849	0	0	0	0	0	0	0	0	0	0	0	0	0	0	0	0	0	0	0	0	0	0	0	0	0	0	0	0	0	0	0	0	0	0	0	0	0	4.02122e-06	8.04245e-06	0
Streptobacillus moniliformis nov 86.80%	0	0	0	0	8.54e-05	0	0	0	0	0	0	0	0	0	0	0	0	0	0	0	0	0	0	0	0	0	0	0	0	0	0	0	0	7.43e-05	0	0	0	0	0	0	3.9925e-06	4.27e-06	3.91053e-06
Neisseria meningitidis	0	0	0	0	0	0	0	0	0	0	0	0	0	0	0	0	0	0	0	0	0	0	0	0	9.51e-05	0	0	0	0	0	0	0	0	0	0	6.25e-05	0	0	0	0	3.94e-06	0	8.29474e-06
Selenomonas sp. oral taxon 479	0	0	0	0	8.54e-05	0	0	0	0	0	0	0	0	0	0	0	0	0	0	0	0	0	0	0	0	7.03e-05	0	0	0	0	0	0	0	0	0	0	0	0	0	0	3.8925e-06	4.27e-06	3.7e-06
Pseudomonas mosselii Oral Taxon A88	0	0	8.04e-05	0	0	0	0	0	0	0	0	0	0	0	0	0	0	0	0	0	0	0	0	0	0	0	0	0	0	0	0	0	0	0	0	0	7.43e-05	0	0	0	3.8675e-06	4.02e-06	3.91053e-06
Leptotrichia sp. oral taxon 212 nov 93.33%	0	0	0	0	0	0	0	0	0	0	0	0	0	0	0	0	0	0	0	0	0	0	0	0	0	0	0	0	0	0	0	0	0.000154075	0	0	0	0	0	0	0	3.85187e-06	0	8.10921e-06
Tannerella forsythia nov 94.87%	0	0	0	0	0	0	0	0	0	0	0	0	0	0	0	0	0	0	0	0	0	0	0	0	0	0	0	0	0	0	0	0	0	0.000148644	0	0	0	0	0	0	3.7161e-06	0	7.82337e-06
Prevotella intermedia nov 96.56%	0	0	0	0	0	0	0	0	0	0	0	0	0	0	0	0	0	0	0	0	0	0	0	0	0	0	0	0	0	0	0	0	0	0.000148644	0	0	0	0	0	0	3.7161e-06	0	7.82337e-06
Fusobacterium nucleatum subsp. animalis nov 97.21%	0	0	0	0	0	0	0	0	0	0	0	0	0	0	0	0	0	0	0	0	0	0	0	0	0	0	0	0	0	0	0	0	0	0.000148644	0	0	0	0	0	0	3.7161e-06	0	7.82337e-06
Corynebacterium tuscaniense nov 94.67%	0	0	0	0	0	0	0	0	0	0	0	0	0	0	0	0	0	0	0	0	0	0	0	0	0	0	0	0	0	0	0	0	0	0	0	0	0.000148544	0	0	0	3.7136e-06	0	7.81811e-06
Knoellia subterranea nov 82.55%	0	0	0	0	0	0	0	0	0	0	0	0	0	0	0	0	0	0	0	0	0	0	0	0	0	0	0	0	0	0	0	0	0	0	0	0	0.000148544	0	0	0	3.7136e-06	0	7.81811e-06
Exiguobacterium acetylicum	0	3.55e-05	0	0	0	0	0	0	0	0	0	0	0	0	0	0	0	0	0	0	0	0	0	0	0	0	0	0	0	0	0	0	0	0	0	0	0	0	0.000112423	0	3.69808e-06	1.775e-06	5.917e-06
Corynebacterium sp. Oral Taxon B71	0	0	0	0	0	0	0	0	0	0	0	0	0	0	0	0	0	0	0	0	0	7.35e-05	0	0	0	0	0	0	0	0	0	0	0	0	0	0	7.43e-05	0	0	0	3.695e-06	0	7.77895e-06
Leptotrichia goodfellowii nov 92.32%	0	0	0	0	0	0	0	0	0	0	0	0	0	0	0	0	0	0	0	0	0	0.000147016	0	0	0	0	0	0	0	0	0	0	0	0	0	0	0	0	0	0	3.6754e-06	0	7.73768e-06
Haemophilus parainfluenzae nov 97.76%	0	0	0	0	0	0	0	0	0	0	0	0	0	0	0	0	0	0	0	0	0	0	0	0	0	0	0	0	0	0	8.31e-05	0	0	0	0	6.25e-05	0	0	0	0	3.64e-06	0	7.66316e-06
Corynebacterium sundsvallense	0	0	0	0	0	0	0	0	0	0	0	0.000145096	0	0	0	0	0	0	0	0	0	0	0	0	0	0	0	0	0	0	0	0	0	0	0	0	0	0	0	0	3.6274e-06	7.2548e-06	0
Prevotella sp. oral taxon 396 nov 84.95%	0	0	0	0	0	0	0	0	0	0	0	0.000145096	0	0	0	0	0	0	0	0	0	0	0	0	0	0	0	0	0	0	0	0	0	0	0	0	0	0	0	0	3.6274e-06	7.2548e-06	0
Catonella morbi nov 93.63%	0	0	0	0	0	0	0	0	0	0	0	0.000145096	0	0	0	0	0	0	0	0	0	0	0	0	0	0	0	0	0	0	0	0	0	0	0	0	0	0	0	0	3.6274e-06	7.2548e-06	0
Fusobacterium nucleatum subsp. polymorphum nov 96.91%	0	0	0	0	0	0	0	0	0	0	0	0.000145096	0	0	0	0	0	0	0	0	0	0	0	0	0	0	0	0	0	0	0	0	0	0	0	0	0	0	0	0	3.6274e-06	7.2548e-06	0
Leptotrichia sp. oral taxon 215 nov 97.84%	0	0	0	0	0	0	0	0	0	0	0	0.000145096	0	0	0	0	0	0	0	0	0	0	0	0	0	0	0	0	0	0	0	0	0	0	0	0	0	0	0	0	3.6274e-06	7.2548e-06	0
Neisseria sp. oral taxon 499	0	0	0	0	0	0	0	0	0	0	0	0.000145096	0	0	0	0	0	0	0	0	0	0	0	0	0	0	0	0	0	0	0	0	0	0	0	0	0	0	0	0	3.6274e-06	7.2548e-06	0
Haemophilus parahaemolyticus nov 96.56%	0	0	0	0	0	0	0	0	0	0	0	0.000145096	0	0	0	0	0	0	0	0	0	0	0	0	0	0	0	0	0	0	0	0	0	0	0	0	0	0	0	0	3.6274e-06	7.2548e-06	0
Streptococcus sp. Oral Taxon C04	0	0	0	0	0	0	0	0	0	0	0	0	0	0	0	0.000144728	0	0	0	0	0	0	0	0	0	0	0	0	0	0	0	0	0	0	0	0	0	0	0	0	3.6182e-06	7.2364e-06	0
Pseudomonas otitidis nov 96.12%	0	0	0	0	0	0	0	0	0	0	0	0	0	0	0	0.000144728	0	0	0	0	0	0	0	0	0	0	0	0	0	0	0	0	0	0	0	0	0	0	0	0	3.6182e-06	7.2364e-06	0
Bosea vestrisii nov 89.46%	0	0	0	0.000142929	0	0	0	0	0	0	0	0	0	0	0	0	0	0	0	0	0	0	0	0	0	0	0	0	0	0	0	0	0	0	0	0	0	0	0	0	3.57322e-06	7.14645e-06	0
Sphingomonas astaxanthinifaciens	0	0	0	0.000142929	0	0	0	0	0	0	0	0	0	0	0	0	0	0	0	0	0	0	0	0	0	0	0	0	0	0	0	0	0	0	0	0	0	0	0	0	3.57322e-06	7.14645e-06	0
Methyloversatilis discipulorum	0	0	0	0.000142929	0	0	0	0	0	0	0	0	0	0	0	0	0	0	0	0	0	0	0	0	0	0	0	0	0	0	0	0	0	0	0	0	0	0	0	0	3.57322e-06	7.14645e-06	0
Peptoclostridium sticklandii nov 79.75%	0	0	0	0	8.54e-05	0	0	0	0	0	0	0	0	0	0	0	0	0	5.69e-05	0	0	0	0	0	0	0	0	0	0	0	0	0	0	0	0	0	0	0	0	0	3.5575e-06	7.115e-06	0
Selenomonas sp. Oral Taxon G55	0	0.000142086	0	0	0	0	0	0	0	0	0	0	0	0	0	0	0	0	0	0	0	0	0	0	0	0	0	0	0	0	0	0	0	0	0	0	0	0	0	0	3.55215e-06	7.1043e-06	0
Corynebacterium durum nov 96.72%	0	0	0	0	0	0	0	0	0	0	0	0	0	0	0	0	0	0	0	0	0	0	0	0	0	0.000140667	0	0	0	0	0	0	0	0	0	0	0	0	0	0	3.51668e-06	0	7.40353e-06
Corynebacterium urealyticum nov 82.43%	0	0	0	0	0	0	0	0	0	0	0	0	0	0	0	0	0	0	0	0	0	0	0	0	0	0.000140667	0	0	0	0	0	0	0	0	0	0	0	0	0	0	3.51668e-06	0	7.40353e-06
Glutamicibacter creatinolyticus nov 78.96%	0	0	0	0	0	0	0	0	0	0	0	0	0	0	0	0	0	0	0	0	0	0	0	0	0	0.000140667	0	0	0	0	0	0	0	0	0	0	0	0	0	0	3.51668e-06	0	7.40353e-06
Capnocytophaga gingivalis nov 96.43%	0	0	0	0	0	0	0	0	0	0	0	0	0	0	0	0	0	0	0	0	0	0	0	0	0	0.000140667	0	0	0	0	0	0	0	0	0	0	0	0	0	0	3.51668e-06	0	7.40353e-06
Capnocytophaga leadbetteri nov 95.77%	0	0	0	0	0	0	0	0	0	0	0	0	0	0	0	0	0	0	0	0	0	0	0	0	0	0.000140667	0	0	0	0	0	0	0	0	0	0	0	0	0	0	3.51668e-06	0	7.40353e-06
Capnocytophaga sp. oral taxon 336 nov 97.30%	0	0	0	0	0	0	0	0	0	0	0	0	0	0	0	0	0	0	0	0	0	0	0	0	0	0.000140667	0	0	0	0	0	0	0	0	0	0	0	0	0	0	3.51668e-06	0	7.40353e-06
Bacteroides capillosus nov 79.88%	0	0	0	0	0	0	0	0	0	0	0	0	0	0	0	0	0	0	0	0	0	0	0	0	0	0.000140667	0	0	0	0	0	0	0	0	0	0	0	0	0	0	3.51668e-06	0	7.40353e-06
Firmicutes [G] sp. Oral Taxon C68 nov 86.48%	0	0	0	0	0	0	0	0	0	0	0	0	0	0	0	0	0	0	0	0	0	0	0	0	0	0.000140667	0	0	0	0	0	0	0	0	0	0	0	0	0	0	3.51668e-06	0	7.40353e-06
Selenomonas flueggei nov 90.72%	0	0	0	0	0	0	0	0	0	0	0	0	0	0	0	0	0	0	0	0	0	0	0	0	0	0.000140667	0	0	0	0	0	0	0	0	0	0	0	0	0	0	3.51668e-06	0	7.40353e-06
Leptotrichia hofstadii nov 97.42%	0	0	0	0	0	0	0	0	0	0	0	0	0	0	0	0	0	0	0	0	0	0	0	0	0	0.000140667	0	0	0	0	0	0	0	0	0	0	0	0	0	0	3.51668e-06	0	7.40353e-06
Leptotrichia sp. oral taxon 212 nov 95.91%	0	0	0	0	0	0	0	0	0	0	0	0	0	0	0	0	0	0	0	0	0	0	0	0	0	0.000140667	0	0	0	0	0	0	0	0	0	0	0	0	0	0	3.51668e-06	0	7.40353e-06
Kingella kingae nov 85.14%	0	0	0	0	0	0	0	0	0	0	0	0	0	0	0	0	0	0	0	0	0	0	0	0	0	0.000140667	0	0	0	0	0	0	0	0	0	0	0	0	0	0	3.51668e-06	0	7.40353e-06
Neisseria bacilliformis nov 97.96%	0	0	0	0	0	0	0	0	0	0	0	0	0	0	0	0	0	0	0	0	0	0	0	0	0	0.000140667	0	0	0	0	0	0	0	0	0	0	0	0	0	0	3.51668e-06	0	7.40353e-06
Neisseria elongata nov 97.56%	0	0	0	0	0	0	0	0	0	0	0	0	0	0	0	0	0	0	0	0	0	0	0	0	0	0.000140667	0	0	0	0	0	0	0	0	0	0	0	0	0	0	3.51668e-06	0	7.40353e-06
Bacillus subtilis nov 91.82%	0	0	0	0	0	0	0	4.11e-05	0	0	0	0	0	0	0	0	9.51e-05	0	0	0	0	0	0	0	0	0	0	0	0	0	0	0	0	0	0	0	0	0	0	0	3.405e-06	6.81e-06	0
Fusobacterium nucleatum ss animalis	0	0	0	0	0	0	0	0	0	0	6.23e-05	7.25e-05	0	0	0	0	0	0	0	0	0	0	0	0	0	0	0	0	0	0	0	0	0	0	0	0	0	0	0	0	3.37e-06	6.74e-06	0
Dysgonomonas oryzarvi	0	0	0	0	0	0	0	0	0.000132275	0	0	0	0	0	0	0	0	0	0	0	0	0	0	0	0	0	0	0	0	0	0	0	0	0	0	0	0	0	0	0	3.30687e-06	6.61375e-06	0
Lactobacillus multispecies spp41 2	0	0	0	0	0	0	0	0	0.000132275	0	0	0	0	0	0	0	0	0	0	0	0	0	0	0	0	0	0	0	0	0	0	0	0	0	0	0	0	0	0	0	3.30687e-06	6.61375e-06	0
Johnsonella ignava	0	0	0	0	0	0	0	0	6.61e-05	0	0	0	0	0	0	0	0	0	0	0	0	0	0	0	0	0	0	0	0	0	0	0	0	0	6.57e-05	0	0	0	0	0	3.295e-06	3.305e-06	3.45789e-06
Prevotella sp. oral taxon 942 nov 97.15%	0	0	0	0	0	0	0	0	0	0	0	0	0	0	0	0	0	0	0	0	0	0	0	0	0	0	0	0	0	0	0	0	0	0	0.000131449	0	0	0	0	0	3.28623e-06	0	6.91837e-06
Lachnospiraceae [G-7] sp. oral taxon 086 nov 86.15%	0	0	0	0	0	0	0	0	0	0	0	0	0	0	0	0	0	0	0	0	0	0	0	0	0	0	0	0	0	0	0	0	0	0	0.000131449	0	0	0	0	0	3.28623e-06	0	6.91837e-06
Lachnospiraceae [G-8] sp. oral taxon 500 nov 97.50%	0	0	0	0	0	0	0	0	0	0	0	0	0	0	0	0	0	0	0	0	0	0	0	0	0	0	0	0	0	0	0	0	0	0	0.000131449	0	0	0	0	0	3.28623e-06	0	6.91837e-06
Fusobacterium multispecies spp8 2	0	0	0	0	0	0	0	0	0	0	0	0	0	0	0	0	0	0	0	0	0	0	0	0	0	0	0	0	0	0	0	0	0	0	0.000131449	0	0	0	0	0	3.28623e-06	0	6.91837e-06
Fusobacterium sp. oral taxon 203 nov 96.54%	0	0	0	0	0	0	0	0	0	0	0	0	0	0	0	0	0	0	0	0	0	0	0	0	0	0	0	0	0	0	0	0	0	0	0.000131449	0	0	0	0	0	3.28623e-06	0	6.91837e-06
Treponema sp. Oral Taxon G76	0	0	0	0	0	0	0	0	0	0	0	0	0	0	0	0	0	0	0	0	0	0	0	0	0	0	0	0	0	0	0	0	0	0	0.000131449	0	0	0	0	0	3.28623e-06	0	6.91837e-06
Treponema sp. oral taxon 258 nov 97.16%	0	0	0	0	0	0	0	0	0	0	0	0	0	0	0	0	0	0	0	0	0	0	0	0	0	0	0	0	0	0	0	0	0	0	0.000131449	0	0	0	0	0	3.28623e-06	0	6.91837e-06
Kocuria sp. oral taxon 189 nov 85.92%	0	0	0	0	0	0	0	0	0	0	0	0	0	0	0	0	0	0	0	0	0	0	0	0	0	0	0.000128559	0	0	0	0	0	0	0	0	0	0	0	0	0	3.21397e-06	0	6.76626e-06
Streptococcus sp. oral taxon 066 nov 97.98%	0	0	0	0	0	0	0	0	0	0	0	0	0	0	0	0	0	0	0	0	0	0	0	0	0	0	0.000128559	0	0	0	0	0	0	0	0	0	0	0	0	0	3.21397e-06	0	6.76626e-06
Leptotrichia sp. oral taxon 221 nov 92.78%	0	0	0	0	0	0	0	0	0	0	0	0	0	0	0	0	0	0	0	0	0	0	0	0	0	0	0.000128559	0	0	0	0	0	0	0	0	0	0	0	0	0	3.21397e-06	0	6.76626e-06
Campylobacter concisus nov 97.20%	0	0	0	0	0	0	0	0	0	0	0	0	0	0	0	0	0	0	0	0	0	0	0	0	0	0	0.000128559	0	0	0	0	0	0	0	0	0	0	0	0	0	3.21397e-06	0	6.76626e-06
Haemophilus parainfluenzae nov 96.93%	0	0	0	0	0	0	0	0	0	0	0	0	0	0	0	0	0	0	0	0	0	0	0	0	0	0	0.000128559	0	0	0	0	0	0	0	0	0	0	0	0	0	3.21397e-06	0	6.76626e-06
Arsenicicoccus bolidensis nov 85.03%	0	0	0	0	0	0	0	0	0	0	0	0	0	0	0	0	0	0	0	0	0	0	0	0	0	0	0	0	0	0	0	0	0	0	0	0.000124984	0	0	0	0	3.1246e-06	0	6.57811e-06
Porphyromonas gingivalis nov 96.13%	0	0	0	0	0	0	0	0	0	0	0	0	0	0	0	0	0	0	0	0	0	0	0	0	0	0	0	0	0	0	0	0	0	0	0	0.000124984	0	0	0	0	3.1246e-06	0	6.57811e-06
Porphyromonas sp. oral taxon 275 nov 96.74%	0	0	0	0	0	0	0	0	0	0	0	0	0	0	0	0	0	0	0	0	0	0	0	0	0	0	0	0	0	0	0	0	0	0	0	0.000124984	0	0	0	0	3.1246e-06	0	6.57811e-06
Porphyromonas sp. oral taxon 279 nov 96.95%	0	0	0	0	0	0	0	0	0	0	0	0	0	0	0	0	0	0	0	0	0	0	0	0	0	0	0	0	0	0	0	0	0	0	0	0.000124984	0	0	0	0	3.1246e-06	0	6.57811e-06
Porphyromonas sp. oral taxon 279 nov 97.96%	0	0	0	0	0	0	0	0	0	0	0	0	0	0	0	0	0	0	0	0	0	0	0	0	0	0	0	0	0	0	0	0	0	0	0	0.000124984	0	0	0	0	3.1246e-06	0	6.57811e-06
Prevotella oris nov 96.94%	0	0	0	0	0	0	0	0	0	0	0	0	0	0	0	0	0	0	0	0	0	0	0	0	0	0	0	0	0	0	0	0	0	0	0	0.000124984	0	0	0	0	3.1246e-06	0	6.57811e-06
Streptococcus australis nov 82.48%	0	0	0	0	0	0	0	0	0	0	0	0	0	0	0	0	0	0	0	0	0	0	0	0	0	0	0	0	0	0	0	0	0	0	0	0.000124984	0	0	0	0	3.1246e-06	0	6.57811e-06
Streptococcus cristatus nov 97.98%	0	0	0	0	0	0	0	0	0	0	0	0	0	0	0	0	0	0	0	0	0	0	0	0	0	0	0	0	0	0	0	0	0	0	0	0.000124984	0	0	0	0	3.1246e-06	0	6.57811e-06
Streptococcus multispecies sppn1 2 nov 81.35%	0	0	0	0	0	0	0	0	0	0	0	0	0	0	0	0	0	0	0	0	0	0	0	0	0	0	0	0	0	0	0	0	0	0	0	0.000124984	0	0	0	0	3.1246e-06	0	6.57811e-06
Peptostreptococcus anaerobius nov 84.95%	0	0	0	0	0	0	0	0	0	0	0	0	0	0	0	0	0	0	0	0	0	0	0	0	0	0	0	0	0	0	0	0	0	0	0	0.000124984	0	0	0	0	3.1246e-06	0	6.57811e-06
Fusobacterium periodonticum nov 91.43%	0	0	0	0	0	0	0	0	0	0	0	0	0	0	0	0	0	0	0	0	0	0	0	0	0	0	0	0	0	0	0	0	0	0	0	0.000124984	0	0	0	0	3.1246e-06	0	6.57811e-06
Fusobacterium periodonticum nov 96.26%	0	0	0	0	0	0	0	0	0	0	0	0	0	0	0	0	0	0	0	0	0	0	0	0	0	0	0	0	0	0	0	0	0	0	0	0.000124984	0	0	0	0	3.1246e-06	0	6.57811e-06
Leptotrichia sp. oral taxon 215 nov 95.91%	0	0	0	0	0	0	0	0	0	0	0	0	0	0	0	0	0	0	0	0	0	0	0	0	0	0	0	0	0	0	0	0	0	0	0	0.000124984	0	0	0	0	3.1246e-06	0	6.57811e-06
Leptotrichia sp. oral taxon 221 nov 83.95%	0	0	0	0	0	0	0	0	0	0	0	0	0	0	0	0	0	0	0	0	0	0	0	0	0	0	0	0	0	0	0	0	0	0	0	0.000124984	0	0	0	0	3.1246e-06	0	6.57811e-06
Neisseria flavescens|subflava nov 95.93%	0	0	0	0	0	0	0	0	0	0	0	0	0	0	0	0	0	0	0	0	0	0	0	0	0	0	0	0	0	0	0	0	0	0	0	0.000124984	0	0	0	0	3.1246e-06	0	6.57811e-06
Neisseria flavescens|subflava nov 97.34%	0	0	0	0	0	0	0	0	0	0	0	0	0	0	0	0	0	0	0	0	0	0	0	0	0	0	0	0	0	0	0	0	0	0	0	0.000124984	0	0	0	0	3.1246e-06	0	6.57811e-06
Aggregatibacter sp. oral taxon 898 nov 96.33%	0	0	0	0	0	0	0	0	0	0	0	0	0	0	0	0	0	0	0	0	0	0	0	0	0	0	0	0	0	0	0	0	0	0	0	0.000124984	0	0	0	0	3.1246e-06	0	6.57811e-06
Haemophilus paraphrohaemolyticus nov 96.11%	0	0	0	0	0	0	0	0	0	0	0	0	0	0	0	0	0	0	0	0	0	0	0	0	0	0	0	0	0	0	0	0	0	0	0	0.000124984	0	0	0	0	3.1246e-06	0	6.57811e-06
Agrococcus baldri Oral Taxon A19 nov 78.64%	0	0	0	0	0	0	0	0	0	0	0.000124541	0	0	0	0	0	0	0	0	0	0	0	0	0	0	0	0	0	0	0	0	0	0	0	0	0	0	0	0	0	3.11353e-06	6.22705e-06	0
Kocuria sp. oral taxon 189 nov 86.28%	0	0	0	0	0	0	0	0	0	0	0.000124541	0	0	0	0	0	0	0	0	0	0	0	0	0	0	0	0	0	0	0	0	0	0	0	0	0	0	0	0	0	3.11353e-06	6.22705e-06	0
Nesterenkonia lutea nov 79.05%	0	0	0	0	0	0	0	0	0	0	0.000124541	0	0	0	0	0	0	0	0	0	0	0	0	0	0	0	0	0	0	0	0	0	0	0	0	0	0	0	0	0	3.11353e-06	6.22705e-06	0
Bacteroides zoogleoformans nov 88.24%	0	0	0	0	0	0	0	0	0	0	0.000124541	0	0	0	0	0	0	0	0	0	0	0	0	0	0	0	0	0	0	0	0	0	0	0	0	0	0	0	0	0	3.11353e-06	6.22705e-06	0
Prevotella sp. oral taxon 304 nov 97.14%	0	0	0	0	0	0	0	0	0	0	0.000124541	0	0	0	0	0	0	0	0	0	0	0	0	0	0	0	0	0	0	0	0	0	0	0	0	0	0	0	0	0	3.11353e-06	6.22705e-06	0
Prevotella sp. oral taxon 443 nov 97.96%	0	0	0	0	0	0	0	0	0	0	0.000124541	0	0	0	0	0	0	0	0	0	0	0	0	0	0	0	0	0	0	0	0	0	0	0	0	0	0	0	0	0	3.11353e-06	6.22705e-06	0
Capnocytophaga leadbetteri nov 96.86%	0	0	0	0	0	0	0	0	0	0	0.000124541	0	0	0	0	0	0	0	0	0	0	0	0	0	0	0	0	0	0	0	0	0	0	0	0	0	0	0	0	0	3.11353e-06	6.22705e-06	0
Catonella morbi nov 97.30%	0	0	0	0	0	0	0	0	0	0	0.000124541	0	0	0	0	0	0	0	0	0	0	0	0	0	0	0	0	0	0	0	0	0	0	0	0	0	0	0	0	0	3.11353e-06	6.22705e-06	0
Selenomonas dianae nov 96.67%	0	0	0	0	0	0	0	0	0	0	0.000124541	0	0	0	0	0	0	0	0	0	0	0	0	0	0	0	0	0	0	0	0	0	0	0	0	0	0	0	0	0	3.11353e-06	6.22705e-06	0
Fusobacterium nucleatum subsp. vincentii nov 95.22%	0	0	0	0	0	0	0	0	0	0	0.000124541	0	0	0	0	0	0	0	0	0	0	0	0	0	0	0	0	0	0	0	0	0	0	0	0	0	0	0	0	0	3.11353e-06	6.22705e-06	0
Leptotrichia sp. oral taxon 215 nov 95.46%	0	0	0	0	0	0	0	0	0	0	0.000124541	0	0	0	0	0	0	0	0	0	0	0	0	0	0	0	0	0	0	0	0	0	0	0	0	0	0	0	0	0	3.11353e-06	6.22705e-06	0
Leptotrichia sp. oral taxon 225 nov 95.90%	0	0	0	0	0	0	0	0	0	0	0.000124541	0	0	0	0	0	0	0	0	0	0	0	0	0	0	0	0	0	0	0	0	0	0	0	0	0	0	0	0	0	3.11353e-06	6.22705e-06	0
Leptotrichia sp. oral taxon 879 nov 95.24%	0	0	0	0	0	0	0	0	0	0	0.000124541	0	0	0	0	0	0	0	0	0	0	0	0	0	0	0	0	0	0	0	0	0	0	0	0	0	0	0	0	0	3.11353e-06	6.22705e-06	0
Treponema sp. oral taxon 238 nov 95.35%	0	0	0	0	0	0	0	0	0	0	0.000124541	0	0	0	0	0	0	0	0	0	0	0	0	0	0	0	0	0	0	0	0	0	0	0	0	0	0	0	0	0	3.11353e-06	6.22705e-06	0
Treponema sp. oral taxon 258 nov 96.98%	0	0	0	0	0	0	0	0	0	0	0.000124541	0	0	0	0	0	0	0	0	0	0	0	0	0	0	0	0	0	0	0	0	0	0	0	0	0	0	0	0	0	3.11353e-06	6.22705e-06	0
Veillonellaceae [G-1] sp. oral taxon 135	0	0	0	0	0	0	0	0	0	0	0	0	0	0	0	0	0	5.86e-05	0	0	0	0	0	0	0	0	0	0	0	0	0	0	0	0	6.57e-05	0	0	0	0	0	3.1075e-06	2.93e-06	3.45789e-06
Ottowia sp. oral taxon 894 nov 96.67%	0	0	0	0	0	0	0	0.000123244	0	0	0	0	0	0	0	0	0	0	0	0	0	0	0	0	0	0	0	0	0	0	0	0	0	0	0	0	0	0	0	0	3.0811e-06	6.1622e-06	0
Actinomyces johnsonii	0	0	0	0	0	0	0	0	0	0	0	0	0	0	0	0	0	0	0	0	0	0	0	0	0	7.03e-05	0	0	0	0	0	0	5.14e-05	0	0	0	0	0	0	0	3.0425e-06	0	6.40526e-06
Selenomonas sp. oral taxon 138	0	0	0	0	0	0	0	0	0	0	0	0	0	0	0	0	0	0	0	0	0	0	0	0	0	7.03e-05	0	0	0	0	0	0	5.14e-05	0	0	0	0	0	0	0	3.0425e-06	0	6.40526e-06
Fusobacterium canifelinum	0	0	0	0	0	0	0	0	0	0	0	0	0	0	0	0	0	0	0	0	0	0	0	0	0	7.03e-05	0	0	0	0	0	0	5.14e-05	0	0	0	0	0	0	0	3.0425e-06	0	6.40526e-06
TM7 [G-1] sp. oral taxon 869 nov 83.88%	0	0	0	0	0	0	0	0	0	0	0	0	0	0	0	0	0	0	0	0	0	0	0	0	0	7.03e-05	0	0	0	0	0	0	5.14e-05	0	0	0	0	0	0	0	3.0425e-06	0	6.40526e-06
Rhodobacter capsulatus nov 91.57%	0	0	0	0	0	0	0	0	0	0	0	0	0	0.000118357	0	0	0	0	0	0	0	0	0	0	0	0	0	0	0	0	0	0	0	0	0	0	0	0	0	0	2.95893e-06	5.91785e-06	0
Rothia mucilaginosa nov 97.45%	0	0	0	0	0	0	0	0	0	0	0	0	0	0	0	0	0	0	0	4.31e-05	0	0	0	0	0	0	0	0	0	0	0	0	0	7.43e-05	0	0	0	0	0	0	2.935e-06	2.155e-06	3.91053e-06
Enterobacter kobei	0	0	0	0	0	0	0	0	0	0.000117247	0	0	0	0	0	0	0	0	0	0	0	0	0	0	0	0	0	0	0	0	0	0	0	0	0	0	0	0	0	0	2.93117e-06	5.86235e-06	0
Brachybacterium sp. Oral Taxon D23	0	0	0	0	0	0	0	0	0	0	0	0	0	0	0	0	0	0.000117178	0	0	0	0	0	0	0	0	0	0	0	0	0	0	0	0	0	0	0	0	0	0	2.92945e-06	5.8589e-06	0
Prevotella enoeca nov 82.44%	0	0	0	0	0	0	0	0	0	0	0	0	0	0	0	0	0	0.000117178	0	0	0	0	0	0	0	0	0	0	0	0	0	0	0	0	0	0	0	0	0	0	2.92945e-06	5.8589e-06	0
Prevotella enoeca nov 97.15%	0	0	0	0	0	0	0	0	0	0	0	0	0	0	0	0	0	0.000117178	0	0	0	0	0	0	0	0	0	0	0	0	0	0	0	0	0	0	0	0	0	0	2.92945e-06	5.8589e-06	0
Bergeyella sp. oral taxon 931 nov 80.72%	0	0	0	0	0	0	0	0	0	0	0	0	0	0	0	0	0	0.000117178	0	0	0	0	0	0	0	0	0	0	0	0	0	0	0	0	0	0	0	0	0	0	2.92945e-06	5.8589e-06	0
Caldilinea aerophila nov 81.74%	0	0	0	0	0	0	0	0	0	0	0	0	0	0	0	0	0	0.000117178	0	0	0	0	0	0	0	0	0	0	0	0	0	0	0	0	0	0	0	0	0	0	2.92945e-06	5.8589e-06	0
Peptoniphilaceae [G-3] sp. oral taxon 929	0	0	0	0	0	0	0	0	0	0	0	0	0	0	0	0	0	0.000117178	0	0	0	0	0	0	0	0	0	0	0	0	0	0	0	0	0	0	0	0	0	0	2.92945e-06	5.8589e-06	0
Pseudoxanthomonas suwonensis	0	0	0	0	0	0	0	0	0	0	0	0	0	0	0	0	0	0.000117178	0	0	0	0	0	0	0	0	0	0	0	0	0	0	0	0	0	0	0	0	0	0	2.92945e-06	5.8589e-06	0
Treponema sp. oral taxon 231 nov 97.17%	0	0	0	0	0	0	0	0	0	0	0	0	0	0	0	0	0	0.000117178	0	0	0	0	0	0	0	0	0	0	0	0	0	0	0	0	0	0	0	0	0	0	2.92945e-06	5.8589e-06	0
Fusobacterium nucleatum ss vincentii	0	0	0	0	0	0	0	0	0	0	6.23e-05	0	0	0	5.42e-05	0	0	0	0	0	0	0	0	0	0	0	0	0	0	0	0	0	0	0	0	0	0	0	0	0	2.9125e-06	5.825e-06	0
Tannerella sp. oral taxon 916 nov 83.13%	0	0	0	0	0	0	0	0	0	0	0	0	0	0	0	0	0	0	0.000113766	0	0	0	0	0	0	0	0	0	0	0	0	0	0	0	0	0	0	0	0	0	2.84415e-06	5.6883e-06	0
Veillonella parvula group nov 97.84%	0	0	0	0	0	0	0	0	0	0	0	0	0	0	0	0	0	0	0	0	0	0	0	4.92e-05	0	0	6.43e-05	0	0	0	0	0	0	0	0	0	0	0	0	0	2.8375e-06	0	5.97368e-06
Actinobaculum sp. oral taxon 848	0	0	0	0	0	0	0	0	0	0	0	0	0	0	0	0	0	0	0	0	0	0	0	0	0	0	0	0	0	0	0	0	0	0	0	0	0	0	0.000112423	0	2.81058e-06	0	5.917e-06
Kingella sp. oral taxon 012	0	0	0	0	0	0	0	0	0	0	0	0	0	0	0	0	0	0	0	0	0	0	0	0	0	0	0	0	0	0	0	0	0	0	0	0	0	0	0.000112423	0	2.81058e-06	0	5.917e-06
Prevotella denticola nov 91.09%	0	3.55e-05	0	0	0	0	0	0	0	0	0	0	0	0	0	0	0	0	0	0	0	0	0	0	0	0	0	0	0	0	0	0	0	7.43e-05	0	0	0	0	0	0	2.745e-06	1.775e-06	3.91053e-06
Brevibacterium siliguriense	0	0	0	0	0	0	0	0	0	0	0	0	0.000108826	0	0	0	0	0	0	0	0	0	0	0	0	0	0	0	0	0	0	0	0	0	0	0	0	0	0	0	2.72065e-06	5.4413e-06	0
Ruminococcaceae [G-3] sp. oral taxon 366 nov 88.82%	0	0	0	0	0	0	0	0	0	0	0	0	0.000108826	0	0	0	0	0	0	0	0	0	0	0	0	0	0	0	0	0	0	0	0	0	0	0	0	0	0	0	2.72065e-06	5.4413e-06	0
Chryseobacterium hispalense	0	0	0	0	0	0	0	0	0	0	0	0	0	0	0.00010836	0	0	0	0	0	0	0	0	0	0	0	0	0	0	0	0	0	0	0	0	0	0	0	0	0	2.709e-06	5.418e-06	0
Lachnoanaerobaculum sp. oral taxon 496	0	0	0	0	0	0	0	0	0	0	0	0	0	0	0.00010836	0	0	0	0	0	0	0	0	0	0	0	0	0	0	0	0	0	0	0	0	0	0	0	0	0	2.709e-06	5.418e-06	0
Pseudomonas pseudoalcaligenes nov 94.40%	0	0	0	0	0	0	0	0	0	0	0	0	0	0	0.00010836	0	0	0	0	0	0	0	0	0	0	0	0	0	0	0	0	0	0	0	0	0	0	0	0	0	2.709e-06	5.418e-06	0
Lactobacillus gastricus	0	0	0	0	0	0.000107585	0	0	0	0	0	0	0	0	0	0	0	0	0	0	0	0	0	0	0	0	0	0	0	0	0	0	0	0	0	0	0	0	0	0	2.68962e-06	5.37925e-06	0
Prevotella multispecies spp10 2	0.000107521	0	0	0	0	0	0	0	0	0	0	0	0	0	0	0	0	0	0	0	0	0	0	0	0	0	0	0	0	0	0	0	0	0	0	0	0	0	0	0	2.68802e-06	5.37605e-06	0
Paenibacillus glucanolyticus nov 77.71%	0.000107521	0	0	0	0	0	0	0	0	0	0	0	0	0	0	0	0	0	0	0	0	0	0	0	0	0	0	0	0	0	0	0	0	0	0	0	0	0	0	0	2.68802e-06	5.37605e-06	0
Capnocytophaga sputigena nov 95.58%	0	0.000106564	0	0	0	0	0	0	0	0	0	0	0	0	0	0	0	0	0	0	0	0	0	0	0	0	0	0	0	0	0	0	0	0	0	0	0	0	0	0	2.6641e-06	5.3282e-06	0
Clostridiales [G] sp. Oral Taxon C07 nov 79.50%	0	0.000106564	0	0	0	0	0	0	0	0	0	0	0	0	0	0	0	0	0	0	0	0	0	0	0	0	0	0	0	0	0	0	0	0	0	0	0	0	0	0	2.6641e-06	5.3282e-06	0
Propionigenium modestum nov 87.31%	0	0.000106564	0	0	0	0	0	0	0	0	0	0	0	0	0	0	0	0	0	0	0	0	0	0	0	0	0	0	0	0	0	0	0	0	0	0	0	0	0	0	2.6641e-06	5.3282e-06	0
Pseudomonas multispecies spp43 2	0	0.000106564	0	0	0	0	0	0	0	0	0	0	0	0	0	0	0	0	0	0	0	0	0	0	0	0	0	0	0	0	0	0	0	0	0	0	0	0	0	0	2.6641e-06	5.3282e-06	0
Propionibacterium acidipropionici Oral Taxon A80 nov 88.84%	0	0	0	0	0	0	0	0	0	0	0	0	0	0	0	0	0	0	0	0	0	0	0	0	0	0	0	0	0	0	0	0	0.000102717	0	0	0	0	0	0	0	2.56793e-06	0	5.40616e-06
Prevotella buccae nov 89.07%	0	0	0	0	0	0	0	0	0	0	0	0	0	0	0	0	0	0	0	0	0	0	0	0	0	0	0	0	0	0	0	0	0.000102717	0	0	0	0	0	0	0	2.56793e-06	0	5.40616e-06
Prevotella loescheii nov 94.75%	0	0	0	0	0	0	0	0	0	0	0	0	0	0	0	0	0	0	0	0	0	0	0	0	0	0	0	0	0	0	0	0	0.000102717	0	0	0	0	0	0	0	2.56793e-06	0	5.40616e-06
Lachnoanaerobaculum umeaense nov 94.03%	0	0	0	0	0	0	0	0	0	0	0	0	0	0	0	0	0	0	0	0	0	0	0	0	0	0	0	0	0	0	0	0	0.000102717	0	0	0	0	0	0	0	2.56793e-06	0	5.40616e-06
Peptostreptococcus anaerobius nov 84.27%	0	0	0	0	0	0	0	0	0	0	0	0	0	0	0	0	0	0	0	0	0	0	0	0	0	0	0	0	0	0	0	0	0.000102717	0	0	0	0	0	0	0	2.56793e-06	0	5.40616e-06
Allobaculum stercoricanis nov 79.16%	0	0	0	0	0	0	0	0	0	0	0	0	0	0	0	0	0	0	0	0	0	0	0	0	0	0	0	0	0	0	0	0	0.000102717	0	0	0	0	0	0	0	2.56793e-06	0	5.40616e-06
Veillonellaceae [G-1] sp. oral taxon 155	0	0	0	0	0	0	0	0	0	0	0	0	0	0	0	0	0	0	0	0	0	0	0	0	0	0	0	0	0	0	0	0	0.000102717	0	0	0	0	0	0	0	2.56793e-06	0	5.40616e-06
Fusobacterium multispecies spp19 2	0	0	0	0	0	0	0	0	0	0	0	0	0	0	0	0	0	0	0	0	0	0	0	0	0	0	0	0	0	0	0	0	0.000102717	0	0	0	0	0	0	0	2.56793e-06	0	5.40616e-06
Fusobacterium nucleatum subsp. polymorphum nov 96.48%	0	0	0	0	0	0	0	0	0	0	0	0	0	0	0	0	0	0	0	0	0	0	0	0	0	0	0	0	0	0	0	0	0.000102717	0	0	0	0	0	0	0	2.56793e-06	0	5.40616e-06
Leptotrichia hongkongensis nov 84.32%	0	0	0	0	0	0	0	0	0	0	0	0	0	0	0	0	0	0	0	0	0	0	0	0	0	0	0	0	0	0	0	0	0.000102717	0	0	0	0	0	0	0	2.56793e-06	0	5.40616e-06
Leptotrichia sp. oral taxon 223 nov 91.38%	0	0	0	0	0	0	0	0	0	0	0	0	0	0	0	0	0	0	0	0	0	0	0	0	0	0	0	0	0	0	0	0	0.000102717	0	0	0	0	0	0	0	2.56793e-06	0	5.40616e-06
Leptotrichia sp. oral taxon 225 nov 97.82%	0	0	0	0	0	0	0	0	0	0	0	0	0	0	0	0	0	0	0	0	0	0	0	0	0	0	0	0	0	0	0	0	0.000102717	0	0	0	0	0	0	0	2.56793e-06	0	5.40616e-06
Leptotrichia sp. oral taxon 392 nov 95.30%	0	0	0	0	0	0	0	0	0	0	0	0	0	0	0	0	0	0	0	0	0	0	0	0	0	0	0	0	0	0	0	0	0.000102717	0	0	0	0	0	0	0	2.56793e-06	0	5.40616e-06
Leptotrichia sp. oral taxon 392 nov 96.57%	0	0	0	0	0	0	0	0	0	0	0	0	0	0	0	0	0	0	0	0	0	0	0	0	0	0	0	0	0	0	0	0	0.000102717	0	0	0	0	0	0	0	2.56793e-06	0	5.40616e-06
GN02 [G-1] sp. oral taxon 872 nov 97.41%	0	0	0	0	0	0	0	0	0	0	0	0	0	0	0	0	0	0	0	0	0	0	0	0	0	0	0	0	0	0	0	0	0.000102717	0	0	0	0	0	0	0	2.56793e-06	0	5.40616e-06
Variovorax paradoxus nov 84.34%	0	0	0	0	0	0	0	0	0	0	0	0	0	0	0	0	0	0	0	0	0	0	0	0	0	0	0	0	0	0	0	0	0.000102717	0	0	0	0	0	0	0	2.56793e-06	0	5.40616e-06
Aggregatibacter sp. oral taxon 949 nov 95.10%	0	0	0	0	0	0	0	0	0	0	0	0	0	0	0	0	0	0	0	0	0	0	0	0	0	0	0	0	0	0	0	0	0.000102717	0	0	0	0	0	0	0	2.56793e-06	0	5.40616e-06
Parageobacillus thermantarcticus	0	0	0	0	0	0	9.88e-05	0	0	0	0	0	0	0	0	0	0	0	0	0	0	0	0	0	0	0	0	0	0	0	0	0	0	0	0	0	0	0	0	0	2.47e-06	4.94e-06	0
Porphyromonas sp. Oral Taxon C34	0	0	0	0	0	0	0	0	0	0	0	0	0	0	0	0	0	0	0	0	0	0	0	0	9.51e-05	0	0	0	0	0	0	0	0	0	0	0	0	0	0	0	2.3775e-06	0	5.00526e-06
Anaeroglobus geminatus	0	0	0	0	0	0	0	0	0	0	0	0	0	0	0	0	9.51e-05	0	0	0	0	0	0	0	0	0	0	0	0	0	0	0	0	0	0	0	0	0	0	0	2.3775e-06	4.755e-06	0
Veillonellaceae [G-1] sp. oral taxon 148	0	0	0	0	0	0	0	0	0	0	0	0	0	0	0	0	9.51e-05	0	0	0	0	0	0	0	0	0	0	0	0	0	0	0	0	0	0	0	0	0	0	0	2.3775e-06	4.755e-06	0
Rosenbergiella epipactidis	0	0	0	0	0	0	0	0	0	0	0	0	0	0	0	0	9.51e-05	0	0	0	0	0	0	0	0	0	0	0	0	0	0	0	0	0	0	0	0	0	0	0	2.3775e-06	4.755e-06	0
Treponema sp. oral taxon 226	0	0	0	0	0	0	0	0	0	0	0	0	0	0	0	0	0	0	0	0	0	0	0	0	9.51e-05	0	0	0	0	0	0	0	0	0	0	0	0	0	0	0	2.3775e-06	0	5.00526e-06
Haemophilus aegyptius	0	0	0	0	0	0	0	0	0	0	0	0	0	0	0	0	0	0	0	0	9.49e-05	0	0	0	0	0	0	0	0	0	0	0	0	0	0	0	0	0	0	0	2.3725e-06	0	0
Prevotella sp. oral taxon 309 nov 86.37%	0	0	0	0	0	0	0	0	0	0	0	0	0	0	0	0	0	0	0	8.62e-05	0	0	0	0	0	0	0	0	0	0	0	0	0	0	0	0	0	0	0	0	2.155e-06	4.31e-06	0
Leptotrichia sp. oral taxon 215 nov 95.71%	0	0	0	0	0	0	0	0	0	0	0	0	0	0	0	0	0	0	0	8.62e-05	0	0	0	0	0	0	0	0	0	0	0	0	0	0	0	0	0	0	0	0	2.155e-06	4.31e-06	0
Corynebacterium aurimucosum	0	0	0	0	8.54e-05	0	0	0	0	0	0	0	0	0	0	0	0	0	0	0	0	0	0	0	0	0	0	0	0	0	0	0	0	0	0	0	0	0	0	0	2.135e-06	4.27e-06	0
Peptostreptococcus anaerobius	0	0	0	0	8.54e-05	0	0	0	0	0	0	0	0	0	0	0	0	0	0	0	0	0	0	0	0	0	0	0	0	0	0	0	0	0	0	0	0	0	0	0	2.135e-06	4.27e-06	0
Selenomonas sp. oral taxon 388	0	0	0	0	8.54e-05	0	0	0	0	0	0	0	0	0	0	0	0	0	0	0	0	0	0	0	0	0	0	0	0	0	0	0	0	0	0	0	0	0	0	0	2.135e-06	4.27e-06	0
Actinobaculum sp. oral taxon 183	0	0	0	0	0	0	0	0	0	0	0	0	0	0	0	0	0	0	0	0	0	0	0	0	0	0	0	0	0	0	0	8.38e-05	0	0	0	0	0	0	0	0	2.095e-06	0	4.41053e-06
Actinomyces viscosus	0	0	0	0	0	0	0	0	0	0	0	0	0	0	0	0	0	0	0	0	0	0	0	0	0	0	0	0	0	0	0	8.38e-05	0	0	0	0	0	0	0	0	2.095e-06	0	4.41053e-06
Sphingobium japonicum	0	0	0	0	0	0	0	0	0	0	0	0	0	0	0	0	0	0	0	0	0	0	0	0	0	0	0	0	0	0	0	8.38e-05	0	0	0	0	0	0	0	0	2.095e-06	0	4.41053e-06
Mitsuokella sp. oral taxon 521	0	0	0	0	0	0	0	0	0	0	0	0	0	0	0	0	0	0	0	0	0	0	0	0	0	0	0	0	0	0	0	0	0	0	0	0	0	8.26e-05	0	0	2.065e-06	0	4.34737e-06
Blastococcus saxobsidens	0	0	0	0	0	0	0	0	0	0	0	0	0	0	0	0	0	0	0	0	0	0	0	0	0	0	0	8.1e-05	0	0	0	0	0	0	0	0	0	0	0	0	2.025e-06	0	4.26316e-06
Scardovia inopinata	0	0	0	0	0	0	0	0	0	0	0	0	0	0	0	0	0	0	0	0	0	0	0	0	0	0	0	8.1e-05	0	0	0	0	0	0	0	0	0	0	0	0	2.025e-06	0	4.26316e-06
Paracoccus caeni	0	0	0	0	0	0	0	0	0	0	0	0	0	0	0	0	0	0	0	0	0	0	0	0	0	0	0	8.1e-05	0	0	0	0	0	0	0	0	0	0	0	0	2.025e-06	0	4.26316e-06
Paracoccus sp. Oral Taxon A23	0	0	0	0	0	0	0	0	0	0	0	0	0	0	0	0	0	0	0	0	0	0	0	0	0	0	0	8.1e-05	0	0	0	0	0	0	0	0	0	0	0	0	2.025e-06	0	4.26316e-06
Sphingomonas paucimobilis	0	0	0	0	0	0	0	0	0	0	0	0	0	0	0	0	0	0	0	0	0	0	0	0	0	0	0	8.1e-05	0	0	0	0	0	0	0	0	0	0	0	0	2.025e-06	0	4.26316e-06
Hydrogenophaga intermedia	0	0	0	0	0	0	0	0	0	0	0	0	0	0	0	0	0	0	0	0	0	0	0	0	0	0	0	8.1e-05	0	0	0	0	0	0	0	0	0	0	0	0	2.025e-06	0	4.26316e-06
Geodermatophilus sabuli	0	0	8.04e-05	0	0	0	0	0	0	0	0	0	0	0	0	0	0	0	0	0	0	0	0	0	0	0	0	0	0	0	0	0	0	0	0	0	0	0	0	0	2.01e-06	4.02e-06	0
Lactobacillus gasseri	0	0	8.04e-05	0	0	0	0	0	0	0	0	0	0	0	0	0	0	0	0	0	0	0	0	0	0	0	0	0	0	0	0	0	0	0	0	0	0	0	0	0	2.01e-06	4.02e-06	0
Eubacterium [XI][G] sp. Oral Taxon B60	0	0	8.04e-05	0	0	0	0	0	0	0	0	0	0	0	0	0	0	0	0	0	0	0	0	0	0	0	0	0	0	0	0	0	0	0	0	0	0	0	0	0	2.01e-06	4.02e-06	0
Desulfomicrobium orale	0	0	8.04e-05	0	0	0	0	0	0	0	0	0	0	0	0	0	0	0	0	0	0	0	0	0	0	0	0	0	0	0	0	0	0	0	0	0	0	0	0	0	2.01e-06	4.02e-06	0
Acinetobacter sp. Oral Taxon C13	0	0	8.04e-05	0	0	0	0	0	0	0	0	0	0	0	0	0	0	0	0	0	0	0	0	0	0	0	0	0	0	0	0	0	0	0	0	0	0	0	0	0	2.01e-06	4.02e-06	0
Corynebacterium afermentans	0	0	0	0	0	0	0	0	0	0	0	0	0	0	0	0	0	0	0	0	0	0	0	0	0	0	0	0	0	0	0	0	0	0	0	0	7.43e-05	0	0	0	1.8575e-06	0	3.91053e-06
Brevibacterium casei	0	0	0	0	0	0	0	0	0	0	0	0	0	0	0	0	0	0	0	0	0	0	0	0	0	0	0	0	0	0	0	0	0	0	0	0	7.43e-05	0	0	0	1.8575e-06	0	3.91053e-06
Peptostreptococcaceae [XI][G-6] [Eubacterium] minutum	0	0	0	0	0	0	0	0	0	0	0	0	0	0	0	0	0	0	0	0	0	0	0	0	0	0	0	0	0	0	0	0	0	7.43e-05	0	0	0	0	0	0	1.8575e-06	0	3.91053e-06
Oxalobacteraceae [G] sp. Oral Taxon C91	0	0	0	0	0	0	0	0	0	0	0	0	0	0	0	0	0	0	0	0	0	0	0	0	0	0	0	0	0	0	0	0	0	0	0	0	7.43e-05	0	0	0	1.8575e-06	0	3.91053e-06
Butyrivibrio sp. oral taxon 455	0	0	0	0	0	0	0	0	0	0	0	7.25e-05	0	0	0	0	0	0	0	0	0	0	0	0	0	0	0	0	0	0	0	0	0	0	0	0	0	0	0	0	1.8125e-06	3.625e-06	0
Mogibacterium pumilum	0	0	0	0	0	0	0	0	0	0	0	7.25e-05	0	0	0	0	0	0	0	0	0	0	0	0	0	0	0	0	0	0	0	0	0	0	0	0	0	0	0	0	1.8125e-06	3.625e-06	0
Anaerococcus vaginalis	0	0	0	0	0	0	0	0	0	0	0	7.25e-05	0	0	0	0	0	0	0	0	0	0	0	0	0	0	0	0	0	0	0	0	0	0	0	0	0	0	0	0	1.8125e-06	3.625e-06	0
Altererythrobacter atlanticus	0	0	0	0	0	0	0	0	0	0	0	7.25e-05	0	0	0	0	0	0	0	0	0	0	0	0	0	0	0	0	0	0	0	0	0	0	0	0	0	0	0	0	1.8125e-06	3.625e-06	0
Catonella morbi nov 96.69%	0	7.1e-05	0	0	0	0	0	0	0	0	0	0	0	0	0	0	0	0	0	0	0	0	0	0	0	0	0	0	0	0	0	0	0	0	0	0	0	0	0	0	1.775e-06	3.55e-06	0
Filifactor alocis nov 97.52%	0	7.1e-05	0	0	0	0	0	0	0	0	0	0	0	0	0	0	0	0	0	0	0	0	0	0	0	0	0	0	0	0	0	0	0	0	0	0	0	0	0	0	1.775e-06	3.55e-06	0
Selenomonas multispecies spp13 2	0	7.1e-05	0	0	0	0	0	0	0	0	0	0	0	0	0	0	0	0	0	0	0	0	0	0	0	0	0	0	0	0	0	0	0	0	0	0	0	0	0	0	1.775e-06	3.55e-06	0
Fusobacterium necrophorum nov 91.72%	0	7.1e-05	0	0	0	0	0	0	0	0	0	0	0	0	0	0	0	0	0	0	0	0	0	0	0	0	0	0	0	0	0	0	0	0	0	0	0	0	0	0	1.775e-06	3.55e-06	0
Fusobacterium nucleatum subsp. vincentii nov 96.15%	0	7.1e-05	0	0	0	0	0	0	0	0	0	0	0	0	0	0	0	0	0	0	0	0	0	0	0	0	0	0	0	0	0	0	0	0	0	0	0	0	0	0	1.775e-06	3.55e-06	0
Methylobacterium sp. Oral Taxon B84	0	7.1e-05	0	0	0	0	0	0	0	0	0	0	0	0	0	0	0	0	0	0	0	0	0	0	0	0	0	0	0	0	0	0	0	0	0	0	0	0	0	0	1.775e-06	3.55e-06	0
Psychrobacter sp. cryopeg55	0	7.1e-05	0	0	0	0	0	0	0	0	0	0	0	0	0	0	0	0	0	0	0	0	0	0	0	0	0	0	0	0	0	0	0	0	0	0	0	0	0	0	1.775e-06	3.55e-06	0
Actinomyces sp. oral taxon 896	0	0	0	0	0	0	0	0	0	0	0	0	0	0	0	0	0	0	0	0	0	0	0	0	0	7.03e-05	0	0	0	0	0	0	0	0	0	0	0	0	0	0	1.7575e-06	0	3.7e-06
Ruminococcaceae [G-1] sp. oral taxon 075	0	0	0	0	0	0	0	0	0	0	0	0	0	0	0	0	0	0	0	0	0	0	0	0	0	7.03e-05	0	0	0	0	0	0	0	0	0	0	0	0	0	0	1.7575e-06	0	3.7e-06
Sphingomonas ginsengisoli An et al. 2013	0	0	0	0	0	0	0	0	0	0	0	0	0	0	0	0	0	0	0	0	0	0	0	0	0	7.03e-05	0	0	0	0	0	0	0	0	0	0	0	0	0	0	1.7575e-06	0	3.7e-06
Tissierella coagulans	0	0	0	0	0	0	0	0	6.61e-05	0	0	0	0	0	0	0	0	0	0	0	0	0	0	0	0	0	0	0	0	0	0	0	0	0	0	0	0	0	0	0	1.6525e-06	3.305e-06	0
Treponema sp. oral taxon 269	0	0	0	0	0	0	0	0	6.61e-05	0	0	0	0	0	0	0	0	0	0	0	0	0	0	0	0	0	0	0	0	0	0	0	0	0	0	0	0	0	0	0	1.6525e-06	3.305e-06	0
Peptostreptococcaceae [XI][G-8] sp. oral taxon 382	0	0	0	0	0	0	0	0	0	0	0	0	0	0	0	0	0	0	0	0	0	0	0	0	0	0	0	0	0	0	0	0	0	0	6.57e-05	0	0	0	0	0	1.6425e-06	0	3.45789e-06
Veillonellaceae [G-1] sp. oral taxon 132	0	0	0	0	0	0	0	0	0	0	0	0	0	0	0	0	0	0	0	0	0	0	0	0	0	0	0	0	0	0	0	0	0	0	6.57e-05	0	0	0	0	0	1.6425e-06	0	3.45789e-06
Leptotrichia sp. oral taxon 847	0	0	0	0	0	0	0	0	0	0	0	0	0	0	0	0	0	0	0	0	0	0	0	0	0	0	0	0	0	0	0	0	0	0	0	6.25e-05	0	0	0	0	1.5625e-06	0	3.28947e-06
TM7 [G] sp. Oral Taxon A56	0	0	0	0	0	0	0	0	0	0	6.23e-05	0	0	0	0	0	0	0	0	0	0	0	0	0	0	0	0	0	0	0	0	0	0	0	0	0	0	0	0	0	1.5575e-06	3.115e-06	0
Mobiluncus mulieris	0	0	0	0	0	0	0	0	0	0	0	0	0	5.92e-05	0	0	0	0	0	0	0	0	0	0	0	0	0	0	0	0	0	0	0	0	0	0	0	0	0	0	1.48e-06	2.96e-06	0
Prevotella bergensis	0	0	0	0	0	0	0	0	0	0	0	0	0	5.92e-05	0	0	0	0	0	0	0	0	0	0	0	0	0	0	0	0	0	0	0	0	0	0	0	0	0	0	1.48e-06	2.96e-06	0
Anaerococcus prevotii	0	0	0	0	0	0	0	0	0	0	0	0	0	5.92e-05	0	0	0	0	0	0	0	0	0	0	0	0	0	0	0	0	0	0	0	0	0	0	0	0	0	0	1.48e-06	2.96e-06	0
Dialister propionicifaciens	0	0	0	0	0	0	0	0	0	0	0	0	0	5.92e-05	0	0	0	0	0	0	0	0	0	0	0	0	0	0	0	0	0	0	0	0	0	0	0	0	0	0	1.48e-06	2.96e-06	0
Peptoniphilus grossensis	0	0	0	0	0	0	0	0	0	0	0	0	0	5.92e-05	0	0	0	0	0	0	0	0	0	0	0	0	0	0	0	0	0	0	0	0	0	0	0	0	0	0	1.48e-06	2.96e-06	0
Psychrobacter pulmonis	0	0	0	0	0	0	0	0	0	0	0	0	0	5.92e-05	0	0	0	0	0	0	0	0	0	0	0	0	0	0	0	0	0	0	0	0	0	0	0	0	0	0	1.48e-06	2.96e-06	0
Pseudonocardia sichuanensis	0	0	0	0	0	0	0	0	0	0	0	0	0	0	0	0	0	5.86e-05	0	0	0	0	0	0	0	0	0	0	0	0	0	0	0	0	0	0	0	0	0	0	1.465e-06	2.93e-06	0
Prevotella buccalis	0	0	0	0	0	0	0	0	0	0	0	0	0	0	0	0	0	5.86e-05	0	0	0	0	0	0	0	0	0	0	0	0	0	0	0	0	0	0	0	0	0	0	1.465e-06	2.93e-06	0
Streptococcus sp. Oral Taxon B59	0	0	0	0	0	0	0	0	0	0	0	0	0	0	0	0	0	5.86e-05	0	0	0	0	0	0	0	0	0	0	0	0	0	0	0	0	0	0	0	0	0	0	1.465e-06	2.93e-06	0
Pseudomonas lutea	0	0	0	0	0	0	0	0	0	0	0	0	0	0	0	0	0	5.86e-05	0	0	0	0	0	0	0	0	0	0	0	0	0	0	0	0	0	0	0	0	0	0	1.465e-06	2.93e-06	0
Capnocytophaga haemolytica	0	0	0	0	0	0	0	0	0	0	0	0	0	0	0	0	0	0	5.69e-05	0	0	0	0	0	0	0	0	0	0	0	0	0	0	0	0	0	0	0	0	0	1.4225e-06	2.845e-06	0
Bifidobacterium adolescentis	0	0	0	0	0	0	0	0	0	0	0	0	5.44e-05	0	0	0	0	0	0	0	0	0	0	0	0	0	0	0	0	0	0	0	0	0	0	0	0	0	0	0	1.36e-06	2.72e-06	0
Lactobacillus agilis	0	0	0	0	0	0	0	0	0	0	0	0	5.44e-05	0	0	0	0	0	0	0	0	0	0	0	0	0	0	0	0	0	0	0	0	0	0	0	0	0	0	0	1.36e-06	2.72e-06	0
Comamonadaceae [G] sp. Oral Taxon B87	0	0	0	0	0	0	0	0	0	0	0	0	5.44e-05	0	0	0	0	0	0	0	0	0	0	0	0	0	0	0	0	0	0	0	0	0	0	0	0	0	0	0	1.36e-06	2.72e-06	0
Veillonellaceae [G-1] sp. oral taxon 150	0	0	0	0	0	0	0	0	0	0	0	0	0	0	5.42e-05	0	0	0	0	0	0	0	0	0	0	0	0	0	0	0	0	0	0	0	0	0	0	0	0	0	1.355e-06	2.71e-06	0
Kocuria carniphila	5.38e-05	0	0	0	0	0	0	0	0	0	0	0	0	0	0	0	0	0	0	0	0	0	0	0	0	0	0	0	0	0	0	0	0	0	0	0	0	0	0	0	1.345e-06	2.69e-06	0
Kocuria gwangalliensis	5.38e-05	0	0	0	0	0	0	0	0	0	0	0	0	0	0	0	0	0	0	0	0	0	0	0	0	0	0	0	0	0	0	0	0	0	0	0	0	0	0	0	1.345e-06	2.69e-06	0
Staphylococcus warneri	5.38e-05	0	0	0	0	0	0	0	0	0	0	0	0	0	0	0	0	0	0	0	0	0	0	0	0	0	0	0	0	0	0	0	0	0	0	0	0	0	0	0	1.345e-06	2.69e-06	0
Actinomyces sp. oral taxon 897	0	0	0	0	0	0	0	0	0	0	0	0	0	0	0	0	0	0	0	0	0	0	0	0	0	0	0	0	0	0	0	0	5.14e-05	0	0	0	0	0	0	0	1.285e-06	0	2.70526e-06
Corynebacterium sp. Oral Taxon A46	0	0	0	0	0	0	0	0	0	0	0	0	0	0	0	0	0	0	0	0	0	0	0	0	0	0	0	0	0	0	0	0	5.14e-05	0	0	0	0	0	0	0	1.285e-06	0	2.70526e-06
Aggregatibacter sp. oral taxon 513	0	0	0	0	0	0	0	0	0	0	0	0	0	0	0	0	0	0	0	0	0	0	0	0	0	0	0	0	0	0	0	0	5.14e-05	0	0	0	0	0	0	0	1.285e-06	0	2.70526e-06
Parascardovia denticolens	0	0	0	0	0	0	0	0	0	0	0	0	0	0	0	0	0	0	0	0	0	0	0	4.92e-05	0	0	0	0	0	0	0	0	0	0	0	0	0	0	0	0	1.23e-06	0	2.58947e-06
Bifidobacterium animalis	0	0	0	0	0	0	0	0	0	0	0	0	0	0	0	0	0	0	0	4.31e-05	0	0	0	0	0	0	0	0	0	0	0	0	0	0	0	0	0	0	0	0	1.0775e-06	2.155e-06	0
Bacillus sp. Oral Taxon C03	0	0	0	0	0	0	0	4.11e-05	0	0	0	0	0	0	0	0	0	0	0	0	0	0	0	0	0	0	0	0	0	0	0	0	0	0	0	0	0	0	0	0	1.0275e-06	2.055e-06	0
Brachybacterium sp. Oral Taxon A83	0	3.55e-05	0	0	0	0	0	0	0	0	0	0	0	0	0	0	0	0	0	0	0	0	0	0	0	0	0	0	0	0	0	0	0	0	0	0	0	0	0	0	8.875e-07	1.775e-06	0
Microbacterium hydrothermale	0	3.55e-05	0	0	0	0	0	0	0	0	0	0	0	0	0	0	0	0	0	0	0	0	0	0	0	0	0	0	0	0	0	0	0	0	0	0	0	0	0	0	8.875e-07	1.775e-06	0

## Sheet: Frequencies
Detection frquencies of species
Status	Cancer	Cancer	Cancer	Cancer	Cancer	Cancer	Cancer	Cancer	Cancer	Cancer	Cancer	Cancer	Cancer	Cancer	Cancer	Cancer	Cancer	Cancer	Cancer	Cancer	Control	Control	Control	Control	Control	Control	Control	Control	Control	Control	Control	Control	Control	Control	Control	Control	Control	Control	Control	Control	Overall	OSCC	Control
ID	C1	C2	C3	C4	C5	C6	C7	C8	C9	C10	C11	C12	C13	C14	C15	C16	C17	C18	C19	C20	N1	N2	N3	N4	N5	N6	N7	N8	N9	N10	N11	N12	N13	N14	N15	N16	N17	N18	N19	N20
Streptococcus mitis	1	1	1	1	1	1	1	1	1	1	1	1	1	1	1	1	1	1	1	1	1	1	1	1	1	1	1	1	1	1	1	1	1	1	1	1	1	1	1	1	1	1	1
Fusobacterium nucleatum subsp. polymorphum	1	1	1	1	1	1	1	1	1	1	1	1	1	1	1	1	1	1	1	1	1	1	1	1	1	1	0	1	1	1	1	1	1	1	1	1	1	1	1	1	0.975	1	0.95
Granulicatella adiacens	1	1	1	1	0	1	1	1	1	1	1	1	1	0	1	1	1	1	1	1	1	1	1	1	1	1	1	1	1	1	1	1	1	1	1	1	1	1	1	1	0.95	0.9	1
Haemophilus parainfluenzae	1	1	1	1	1	1	1	1	1	0	1	1	1	1	0	1	1	1	1	1	1	1	1	1	1	1	1	1	1	1	1	1	1	1	1	1	1	1	1	1	0.95	0.9	1
Fusobacterium periodonticum	1	1	1	1	1	1	1	0	1	1	1	1	1	1	1	1	0	1	1	1	1	1	1	1	1	1	0	1	1	1	1	1	1	1	1	1	1	1	1	1	0.925	0.9	0.95
Rothia mucilaginosa	1	1	1	1	1	1	1	0	1	0	1	1	1	0	1	1	1	0	1	1	1	1	1	1	1	1	1	1	1	1	1	1	1	1	1	1	1	1	1	1	0.9	0.8	1
Veillonella parvula group	1	1	1	1	0	1	1	1	1	1	1	1	1	1	0	0	1	1	1	0	1	1	1	1	1	1	1	1	1	1	1	1	1	1	1	1	1	1	1	1	0.9	0.8	1
Gemella haemolysans	1	1	1	1	0	1	1	1	1	0	1	1	1	1	0	1	1	1	1	1	1	1	0	1	1	1	1	1	1	1	1	1	1	1	1	1	1	1	1	0	0.875	0.85	0.9
Streptococcus sp. oral taxon 431	1	1	1	1	1	1	1	1	1	0	1	1	1	1	0	0	1	1	0	1	1	1	1	1	1	1	1	1	1	1	1	1	1	1	0	1	1	1	1	1	0.875	0.8	0.95
Neisseria flavescens|subflava	1	1	1	1	1	0	1	1	1	0	1	1	1	1	1	1	0	0	1	1	1	1	1	1	1	1	0	1	1	1	1	1	1	1	1	1	1	1	1	1	0.875	0.8	0.95
Porphyromonas sp. oral taxon 279	1	1	0	1	1	1	1	1	1	0	1	1	1	0	1	1	0	1	1	1	1	1	1	0	1	1	0	1	1	1	1	1	1	1	1	1	1	1	1	1	0.85	0.8	0.9
Prevotella melaninogenica	1	1	1	1	1	1	1	0	1	1	1	1	1	0	0	0	0	1	1	1	1	1	1	1	1	0	1	1	1	1	1	1	1	1	1	1	1	1	1	1	0.85	0.75	0.95
Streptococcus sp. oral taxon 423	1	0	0	1	0	1	1	1	1	1	1	1	0	0	0	1	1	1	1	1	1	1	1	1	1	1	1	1	1	1	1	1	1	1	1	1	1	1	1	1	0.85	0.7	1
Capnocytophaga leadbetteri	1	1	0	1	1	0	1	1	1	0	1	1	1	1	1	1	1	1	1	1	1	1	1	1	1	1	0	1	1	1	1	0	1	0	1	1	1	1	1	0	0.825	0.85	0.8
Fusobacterium nucleatum subsp. vincentii	1	1	1	1	1	0	1	1	1	1	1	1	1	1	1	0	1	1	1	0	1	0	0	1	1	1	1	1	0	1	0	1	1	1	1	1	0	1	1	1	0.8	0.85	0.75
Campylobacter concisus	0	1	1	0	1	1	1	1	1	0	1	1	1	1	0	0	1	1	1	1	1	0	1	1	1	1	1	1	1	0	1	0	1	1	1	1	1	1	1	1	0.8	0.75	0.85
Actinomyces odontolyticus	1	0	1	1	0	1	1	1	1	0	0	1	1	0	1	0	1	1	0	1	0	1	1	1	1	1	1	0	1	1	1	1	1	1	1	1	1	1	1	1	0.775	0.65	0.9
Capnocytophaga sputigena	1	1	1	1	0	1	1	1	1	0	1	1	1	1	1	0	0	0	1	0	1	1	1	0	1	1	1	1	1	1	1	1	1	0	1	1	1	1	1	0	0.775	0.7	0.85
Leptotrichia sp. oral taxon 215	1	1	1	1	1	1	1	0	1	0	1	1	1	0	1	0	0	1	1	1	0	0	1	1	1	1	0	1	1	0	1	1	1	1	1	1	1	1	1	1	0.775	0.75	0.8
Leptotrichia sp. oral taxon 225	1	0	1	0	0	1	1	1	1	0	1	1	1	0	1	0	1	1	1	1	1	1	1	1	1	1	0	1	0	1	1	0	1	1	1	1	1	1	1	1	0.775	0.7	0.85
Alloprevotella sp. oral taxon 473	1	0	1	1	1	1	0	1	1	1	1	1	1	1	1	0	0	1	1	1	1	1	1	0	1	1	0	1	1	1	1	0	0	0	1	1	1	1	1	0	0.75	0.8	0.7
Prevotella nanceiensis	1	1	1	1	1	1	1	1	1	0	1	1	0	1	1	0	0	0	1	1	1	0	1	1	1	0	0	1	1	1	1	1	0	0	1	1	1	1	1	1	0.75	0.75	0.75
Streptococcus sanguinis	1	0	0	0	0	1	1	1	1	0	0	1	1	0	1	0	1	1	1	1	1	1	1	1	1	1	1	1	1	1	0	1	1	1	1	1	0	1	1	1	0.75	0.6	0.9
Bergeyella sp. oral taxon 322	0	1	1	1	0	0	1	1	1	0	1	1	1	1	1	0	0	0	0	1	1	1	1	0	1	1	1	1	1	1	1	0	1	1	1	1	1	1	1	0	0.725	0.6	0.85
Streptococcus sp. oral taxon 064	0	0	1	1	0	1	1	1	0	1	0	1	0	1	0	0	1	0	0	1	1	1	1	1	1	1	1	1	1	1	1	1	1	1	1	1	1	1	1	0	0.725	0.5	0.95
Campylobacter showae	1	1	0	1	1	1	1	1	1	0	1	1	1	0	1	1	0	1	1	1	1	0	0	0	1	1	0	1	0	1	0	1	1	0	1	1	1	1	1	0	0.7	0.8	0.6
Solobacterium moorei	1	1	1	0	0	0	1	1	1	0	1	1	1	1	1	1	0	1	1	0	0	0	0	0	1	0	1	1	1	1	1	1	0	1	0	1	1	1	1	1	0.675	0.7	0.65
Fusobacterium nucleatum subsp. animalis	1	1	1	0	0	1	1	1	1	0	1	1	1	0	1	0	1	1	1	0	1	0	1	1	0	0	1	1	0	1	0	1	1	1	1	0	0	1	1	1	0.675	0.7	0.65
Haemophilus sp. oral taxon 036	1	0	1	1	1	1	1	1	1	0	1	1	0	1	1	0	1	1	0	0	1	1	1	0	1	1	0	1	1	1	0	1	1	0	1	0	0	1	1	0	0.675	0.7	0.65
Atopobium parvulum	1	1	1	1	0	0	1	1	1	1	0	1	1	0	0	0	1	1	1	0	1	1	1	1	0	0	1	1	1	1	0	0	0	1	1	1	0	1	0	1	0.65	0.65	0.65
Prevotella oris	1	1	1	0	1	1	1	1	1	1	0	1	1	1	1	0	1	1	1	0	1	0	1	1	0	0	0	0	0	1	0	1	1	0	1	0	0	1	1	1	0.65	0.8	0.5
Capnocytophaga gingivalis	1	1	0	0	0	0	1	1	0	0	1	1	1	0	0	1	0	0	1	0	1	0	1	1	1	1	0	0	1	1	1	1	1	1	1	1	1	1	1	1	0.65	0.45	0.85
Streptococcus dentisani	1	0	0	0	0	1	1	1	0	0	1	1	0	0	0	0	0	0	0	1	1	1	1	1	1	1	0	1	1	1	1	1	1	1	1	1	1	1	1	1	0.65	0.35	0.95
Catonella morbi	1	1	1	0	1	1	1	0	1	0	1	1	1	0	1	0	0	1	1	1	0	1	1	0	0	1	0	0	1	1	0	0	1	1	1	1	1	1	1	0	0.65	0.7	0.6
Parvimonas micra	1	1	1	1	1	1	1	1	1	0	1	1	1	1	1	0	0	1	1	0	0	0	1	0	1	0	1	1	0	0	0	1	1	1	1	0	0	0	1	1	0.65	0.8	0.5
Leptotrichia sp. oral taxon 392	1	1	0	0	0	0	1	1	1	0	1	1	0	0	1	1	0	0	0	1	0	1	1	1	1	1	0	1	1	1	1	0	1	1	1	1	1	1	1	0	0.65	0.5	0.8
Aggregatibacter segnis	1	1	1	1	1	0	1	1	1	0	1	1	1	1	1	0	1	0	1	0	1	1	0	0	1	1	0	1	1	1	1	0	1	0	0	1	0	0	0	1	0.65	0.75	0.55
Streptococcus parasanguinis II	0	0	1	1	0	1	1	1	1	0	1	1	0	0	0	0	1	0	0	1	0	0	1	1	1	0	1	1	1	1	1	1	1	1	0	1	1	1	0	1	0.625	0.5	0.75
Leptotrichia sp. oral taxon 417	0	0	1	0	0	0	1	0	1	0	1	1	1	0	1	0	0	1	1	1	0	0	1	0	1	1	1	1	1	1	0	1	1	1	1	1	0	1	1	1	0.625	0.5	0.75
Lautropia mirabilis	1	0	0	0	0	1	0	1	1	0	0	1	1	0	1	0	0	0	1	0	1	1	0	0	1	1	1	1	1	1	1	1	1	1	1	1	0	1	1	1	0.625	0.4	0.85
Prevotella salivae	0	1	1	1	0	0	1	0	1	1	0	1	1	0	0	0	1	1	1	0	0	0	1	1	1	0	1	1	1	1	0	0	1	1	1	1	0	1	0	1	0.6	0.55	0.65
Granulicatella elegans	1	0	1	1	1	1	1	1	1	0	1	1	1	0	0	1	0	0	1	1	1	1	0	0	1	0	0	1	1	1	0	0	0	0	1	1	1	0	1	0	0.6	0.7	0.5
Streptococcus cristatus	1	0	1	0	0	0	1	0	0	0	0	1	1	0	0	1	0	0	0	1	0	1	1	1	1	1	1	1	1	1	1	1	1	1	0	1	0	1	1	1	0.6	0.35	0.85
Streptococcus infantis	1	0	1	1	0	0	1	0	1	0	0	1	0	0	0	1	0	0	0	1	1	0	1	1	1	0	0	1	1	1	1	1	1	1	1	1	1	0	1	1	0.6	0.4	0.8
Streptococcus tigurinus	1	0	1	0	0	1	1	0	1	0	1	1	1	0	0	0	1	1	1	1	0	1	0	0	1	1	1	1	0	1	0	0	1	1	1	1	0	1	1	0	0.6	0.6	0.6
Lachnoanaerobaculum saburreum	1	1	1	0	0	0	1	1	1	0	1	1	0	0	0	0	0	1	0	0	0	0	1	1	1	1	1	0	1	1	0	1	1	1	0	1	1	1	1	1	0.6	0.45	0.75
Oribacterium sinus	0	1	1	1	1	0	1	0	1	0	0	1	0	0	0	0	1	0	1	1	0	1	1	1	1	0	0	0	1	0	1	1	0	1	1	1	1	1	1	1	0.6	0.5	0.7
Eikenella corrodens	1	0	1	1	1	1	1	1	1	0	0	1	1	1	1	0	1	0	1	0	0	1	1	0	1	1	0	0	0	1	0	0	1	0	1	1	0	1	1	0	0.6	0.7	0.5
Haemophilus haemolyticus	1	1	1	1	1	0	0	1	0	0	1	1	0	1	1	0	1	1	1	0	1	1	0	0	1	0	1	1	0	1	0	0	1	0	1	1	0	1	1	0	0.6	0.65	0.55
Propionibacterium acnes	1	1	1	1	1	0	1	1	0	0	0	1	1	1	1	0	1	1	0	1	1	1	0	0	0	0	0	1	0	1	1	1	0	0	1	0	1	0	1	0	0.575	0.7	0.45
Streptococcus australis	0	0	1	0	0	0	1	0	0	0	0	1	0	0	1	1	0	0	0	1	1	1	1	1	1	0	1	0	1	1	1	1	1	1	0	1	1	1	1	1	0.575	0.3	0.85
Lachnoanaerobaculum umeaense	1	1	0	0	0	0	0	1	1	0	1	1	0	0	1	0	0	1	0	1	0	0	1	0	0	1	1	0	1	1	1	1	1	0	1	1	1	1	1	1	0.575	0.45	0.7
Mogibacterium diversum	0	1	1	0	1	0	1	1	1	1	1	1	1	0	1	0	1	1	1	0	1	0	0	0	1	0	1	1	1	0	0	0	0	1	1	0	0	1	0	1	0.575	0.7	0.45
Peptostreptococcus stomatis	1	1	0	1	1	1	1	1	1	1	1	1	1	1	1	0	1	1	1	0	0	0	0	0	1	0	0	1	0	0	0	0	1	1	1	0	0	0	1	0	0.575	0.85	0.3
Veillonella atypica	1	0	1	1	0	0	1	1	0	0	1	1	1	0	0	0	1	1	0	0	0	0	1	1	0	0	1	1	1	1	0	0	1	1	1	1	0	1	1	1	0.575	0.5	0.65
Fusobacterium sp. HOT 204	0	0	1	1	1	1	0	1	1	0	1	1	0	0	0	0	0	1	0	0	0	0	1	1	1	1	0	1	1	1	0	1	1	1	1	1	0	0	1	1	0.575	0.45	0.7
Neisseria flava	1	1	1	1	0	1	1	1	1	0	1	1	1	1	0	0	0	1	0	0	0	0	0	1	1	1	0	0	1	0	1	0	1	0	1	1	0	1	1	0	0.575	0.65	0.5
Tannerella sp. oral taxon 286	1	0	0	1	0	0	1	1	1	0	1	1	0	0	0	1	0	1	0	0	0	1	1	0	1	1	0	0	0	1	0	1	1	1	1	1	1	1	1	0	0.55	0.45	0.65
Gemella morbillorum	1	1	1	1	1	1	1	1	1	0	1	1	0	1	1	0	0	1	1	0	0	0	0	0	1	0	0	0	0	1	0	1	1	0	1	0	1	0	1	0	0.55	0.75	0.35
Leptotrichia hongkongensis	0	0	1	1	0	1	1	0	0	0	0	0	1	0	0	0	1	1	1	0	1	0	1	1	1	0	1	1	1	1	0	1	1	1	0	1	0	1	1	0	0.55	0.4	0.7
Alloprevotella tannerae	1	0	1	1	1	0	1	1	1	0	1	1	0	1	1	0	0	1	0	0	1	1	0	0	0	0	0	1	0	0	0	1	1	0	1	1	1	1	0	0	0.525	0.6	0.45
Prevotella histicola	1	0	1	1	0	0	1	1	1	0	0	1	0	0	0	0	0	0	1	1	0	0	1	1	0	0	0	1	1	1	0	1	0	1	1	1	0	1	1	1	0.525	0.45	0.6
Streptococcus gordonii	1	0	0	0	0	0	1	1	1	0	1	1	0	0	0	0	1	1	1	1	1	1	0	0	0	1	1	0	0	1	0	0	1	1	1	1	0	1	0	1	0.525	0.5	0.55
Streptococcus multispecies spp14 2	0	0	1	0	0	1	1	0	1	1	0	1	0	0	0	0	0	0	0	1	0	1	1	1	1	0	0	1	1	0	1	1	0	1	1	1	1	1	0	1	0.525	0.35	0.7
Lachnoanaerobaculum orale	1	1	0	1	0	0	0	0	0	0	0	1	0	0	1	0	1	1	1	1	0	0	0	0	1	0	1	0	1	0	1	1	0	1	1	1	1	1	1	1	0.525	0.45	0.6
Leptotrichia sp. oral taxon 212	1	0	1	0	0	0	0	0	1	0	1	1	1	0	1	0	0	0	0	0	0	1	1	0	1	1	0	0	1	1	1	1	1	0	1	1	0	1	1	1	0.525	0.35	0.7
Actinomyces lingnae [NVP]	0	1	0	1	0	0	1	1	1	0	0	1	0	0	0	0	0	0	1	1	0	0	1	1	0	0	1	0	1	0	1	1	0	1	1	1	1	1	0	1	0.5	0.4	0.6
Prevotella pallens	0	0	1	1	0	1	1	1	0	0	0	1	0	1	0	0	0	1	0	0	0	0	1	0	1	0	0	1	1	1	0	0	1	1	1	1	0	1	1	1	0.5	0.4	0.6
Streptococcus parasanguinis I	0	1	0	0	0	1	0	0	0	0	1	1	1	0	0	0	0	1	1	1	1	0	1	1	0	0	1	0	1	0	0	1	0	1	1	1	1	1	0	1	0.5	0.4	0.6
Streptococcus sp. oral taxon 058	1	0	0	0	0	1	0	1	1	0	0	1	0	0	0	0	0	0	0	1	1	1	1	0	1	0	0	0	1	1	1	1	1	0	0	1	1	1	1	1	0.5	0.3	0.7
Leptotrichia wadei	1	0	1	0	0	0	1	0	1	0	1	1	0	0	1	0	1	1	1	0	0	0	1	0	0	0	1	1	0	1	0	0	1	1	0	1	0	1	1	1	0.5	0.5	0.5
Haemophilus parahaemolyticus	1	1	1	0	0	0	0	1	1	0	1	1	1	0	0	0	0	0	0	0	1	1	0	0	1	0	1	0	0	1	1	0	1	1	1	1	1	0	1	0	0.5	0.4	0.6
Porphyromonas sp. oral taxon 930	1	0	1	1	1	0	1	0	0	0	1	1	1	0	0	0	0	1	1	1	1	1	0	0	1	0	0	0	1	1	0	0	0	0	1	0	1	0	1	0	0.475	0.55	0.4
Prevotella intermedia	0	1	0	0	1	0	0	0	1	0	1	0	1	1	1	0	1	1	0	0	0	0	0	0	1	0	0	1	0	1	1	0	1	1	1	1	0	1	1	0	0.475	0.45	0.5
Prevotella sp. oral taxon 314	1	0	1	0	0	0	0	0	1	0	1	0	0	0	0	0	0	0	0	1	1	1	0	0	1	0	0	1	1	1	0	0	1	1	1	1	1	1	1	1	0.475	0.25	0.7
Abiotrophia defectiva	1	0	0	1	0	1	0	1	0	0	0	1	1	1	0	0	0	1	1	0	1	1	1	0	1	1	0	1	0	1	0	0	1	0	0	1	0	0	1	0	0.475	0.45	0.5
Streptococcus sp. oral taxon 066	1	0	1	0	0	1	1	0	1	0	0	1	0	1	0	0	0	0	0	0	0	1	1	0	1	0	1	0	1	0	1	1	0	1	0	1	0	1	1	1	0.475	0.35	0.6
Veillonella multispecies spp17 2	0	0	1	1	0	1	1	1	1	0	1	1	0	0	0	0	1	1	1	0	0	0	0	1	1	0	1	0	1	0	0	0	0	1	0	1	0	1	0	1	0.475	0.55	0.4
TM7 [G-1] sp. oral taxon 349	1	0	1	0	0	0	0	0	1	0	1	1	0	0	0	0	0	1	1	0	0	0	1	0	1	1	0	1	0	1	0	1	1	1	1	1	0	1	1	0	0.475	0.35	0.6
TM7 [G-6] sp. oral taxon 870	1	0	1	0	0	0	0	1	1	0	0	1	1	0	0	0	1	0	1	0	1	1	0	0	1	0	0	1	1	1	0	0	0	0	0	1	1	1	1	1	0.475	0.4	0.55
Corynebacterium matruchotii	1	0	1	0	0	0	1	1	1	0	1	1	0	0	1	0	0	0	0	0	0	1	0	0	1	1	0	1	0	1	0	1	1	0	1	0	0	1	1	0	0.45	0.4	0.5
Propionibacterium propionicum	0	1	0	0	0	0	0	1	1	0	1	1	1	0	1	0	1	1	1	0	0	1	0	0	1	1	0	0	1	1	0	0	1	0	0	0	0	1	1	0	0.45	0.5	0.4
Streptococcus oralis	1	0	0	0	0	1	1	0	0	0	0	1	0	0	1	0	1	0	0	1	1	1	1	0	0	0	1	0	1	1	0	1	0	1	1	1	0	1	0	0	0.45	0.35	0.55
Streptococcus salivarius	0	1	1	0	0	1	1	0	1	0	0	1	0	1	0	0	0	0	0	0	0	0	1	1	0	0	1	1	1	0	0	1	0	1	1	0	1	1	0	1	0.45	0.35	0.55
Kingella denitrificans	1	0	1	1	1	0	0	1	1	0	0	1	0	1	1	1	1	0	0	0	1	0	0	0	1	1	0	0	0	1	0	0	1	0	0	1	0	0	1	0	0.45	0.55	0.35
Neisseria mucosa	0	0	1	0	0	0	1	0	1	0	0	0	0	1	0	0	0	0	1	0	1	1	0	0	1	1	1	1	1	1	0	1	1	0	1	0	0	0	1	1	0.45	0.25	0.65
Aggregatibacter sp. oral taxon 512	1	0	1	1	0	1	0	1	1	0	0	1	1	1	1	1	0	0	1	0	0	1	0	0	0	0	0	0	0	1	0	0	1	0	1	1	0	0	1	0	0.45	0.6	0.3
SR1 [G-1] sp. oral taxon 874	1	0	0	0	1	0	1	0	1	0	1	1	0	0	1	0	0	0	0	0	1	0	1	0	1	1	0	0	1	1	1	0	1	0	0	1	1	0	1	0	0.45	0.35	0.55
Actinomyces graevenitzii	0	0	0	1	0	1	1	1	0	0	0	0	0	0	0	0	0	0	0	0	1	0	1	1	1	1	1	1	1	1	0	0	0	1	0	1	1	0	0	1	0.425	0.2	0.65
Rothia dentocariosa	0	0	0	0	0	0	1	0	0	0	0	1	0	0	1	0	0	0	0	0	0	1	1	1	1	1	1	1	0	1	0	1	0	1	1	1	0	1	1	0	0.425	0.15	0.7
Porphyromonas catoniae	1	0	0	1	0	1	1	1	1	0	0	0	0	0	1	0	0	0	1	0	0	1	0	0	1	1	0	0	0	1	1	1	1	0	0	1	0	0	1	0	0.425	0.4	0.45
Porphyromonas endodontalis	0	0	0	0	1	1	1	0	1	0	1	0	0	0	1	0	1	1	0	0	0	0	0	0	1	0	1	1	0	1	0	0	0	1	1	1	0	1	1	0	0.425	0.4	0.45
Porphyromonas gingivalis	1	1	1	0	1	0	0	0	1	0	1	0	0	0	0	0	0	1	0	0	1	0	0	0	1	0	1	1	0	1	0	0	0	1	1	1	0	1	1	0	0.425	0.35	0.5
Alloprevotella sp. oral taxon 914	1	1	1	1	1	0	0	0	1	0	1	1	1	0	1	0	0	1	0	0	0	0	0	0	1	0	0	0	1	1	0	0	0	0	1	1	1	0	0	0	0.425	0.55	0.3
Capnocytophaga granulosa	1	0	0	1	0	0	1	1	1	0	0	0	1	0	0	0	0	0	0	0	0	1	0	0	1	1	0	0	1	0	1	0	1	1	1	1	0	1	1	0	0.425	0.3	0.55
Gemella sanguinis	1	0	0	0	0	0	0	0	1	0	0	1	0	0	0	0	1	1	0	0	0	0	1	1	1	0	1	0	1	0	1	1	0	1	0	1	1	1	0	1	0.425	0.25	0.6
Stomatobaculum sp. oral taxon 097	0	0	1	1	0	0	0	0	1	0	0	1	0	0	0	0	0	1	0	1	0	0	1	0	0	1	0	0	1	1	1	1	0	1	0	1	1	1	0	1	0.425	0.3	0.55
Ruminococcaceae [G-2] sp. oral taxon 085	0	0	0	1	0	0	1	0	1	0	1	1	0	0	0	0	0	1	0	0	0	0	1	0	0	1	1	0	1	0	1	0	1	1	1	1	1	0	0	1	0.425	0.3	0.55
Leptotrichia buccalis	1	0	1	0	0	0	0	0	1	1	1	0	0	0	1	0	0	0	0	0	0	1	0	0	1	1	0	1	0	1	0	0	1	1	0	1	0	1	1	1	0.425	0.3	0.55
Leptotrichia sp. oral taxon 215 nov 97.41%	0	0	0	0	0	1	0	0	1	0	1	0	1	0	1	0	0	0	0	0	0	0	1	1	0	0	0	1	0	0	1	1	1	0	1	1	1	1	1	1	0.425	0.25	0.6
Neisseria elongata	1	1	0	0	1	0	1	0	1	0	1	1	1	0	1	0	0	0	0	0	0	1	0	0	1	1	1	0	0	0	0	0	1	0	1	0	0	1	1	0	0.425	0.45	0.4
Pseudomonas aeruginosa	1	0	1	0	1	1	1	0	1	1	1	1	1	1	0	1	1	1	0	0	0	0	0	0	0	0	0	1	0	0	0	1	0	0	0	0	1	0	0	0	0.425	0.7	0.15
SR1 [G-1] sp. oral taxon 345	1	1	1	0	1	0	1	0	1	0	1	1	0	0	1	0	0	0	0	0	0	0	0	0	1	1	0	1	0	0	0	0	1	0	0	1	1	1	1	0	0.425	0.45	0.4
Prevotella denticola	1	0	1	0	1	0	0	1	1	0	0	0	1	0	0	0	0	0	0	0	0	0	1	1	0	1	1	1	0	0	0	0	1	1	0	1	0	1	0	1	0.4	0.3	0.5
Streptococcus vestibularis	0	0	0	0	0	1	1	0	0	1	0	1	0	0	0	0	0	0	0	1	0	0	1	0	0	0	1	1	1	1	0	0	0	0	1	1	1	1	1	1	0.4	0.25	0.55
Lachnospiraceae [G-3] sp. oral taxon 100	1	1	0	0	0	0	1	0	1	0	1	1	0	0	1	0	0	1	0	0	0	0	1	0	1	1	0	0	0	0	0	1	1	0	0	1	1	0	1	0	0.4	0.4	0.4
Stomatobaculum longum	0	0	1	1	0	0	0	1	1	0	0	1	0	0	0	0	0	1	1	0	0	0	0	1	0	0	1	1	1	1	0	0	0	1	0	0	0	1	1	1	0.4	0.35	0.45
Selenomonas sputigena	0	1	1	0	1	0	0	0	1	0	1	1	1	0	1	0	1	1	1	1	0	0	0	0	0	0	0	0	0	0	0	0	1	0	1	0	0	1	1	0	0.4	0.6	0.2
Veillonella sp. oral taxon 780	1	0	0	0	1	0	0	0	1	0	1	1	0	0	1	0	1	1	1	1	0	0	0	0	1	0	0	1	0	1	0	1	0	0	1	0	0	0	1	0	0.4	0.5	0.3
Leptotrichia sp. oral taxon 221	0	0	1	0	0	0	1	0	0	0	1	1	0	0	0	0	1	0	0	0	0	0	0	0	1	1	1	1	1	0	0	0	0	1	1	1	0	1	1	1	0.4	0.25	0.55
Neisseria sicca	0	0	1	0	0	1	0	1	0	0	0	1	0	0	1	1	0	0	0	0	0	1	0	0	1	1	0	1	0	0	1	0	1	1	1	0	0	1	1	0	0.4	0.3	0.5
Haemophilus sputorum	0	0	0	0	0	0	0	0	0	0	1	1	1	0	0	0	0	0	0	0	0	1	0	0	1	1	0	0	1	1	1	1	1	1	0	1	1	0	1	1	0.4	0.15	0.65
Rothia aeria	0	0	0	0	0	0	0	0	0	0	0	0	0	0	1	0	0	0	0	0	1	1	1	1	1	1	0	0	0	1	0	1	1	1	1	1	0	1	1	0	0.375	0.05	0.7
Prevotella oulorum	0	0	1	0	0	1	1	1	1	0	0	0	0	0	0	0	0	1	1	0	0	1	0	0	1	1	0	1	0	0	0	0	1	1	0	1	0	1	0	0	0.375	0.35	0.4
Prevotella sp. oral taxon 313	0	0	1	1	1	0	1	0	0	0	0	0	1	0	0	0	0	0	0	0	0	0	1	1	0	0	0	0	1	1	0	0	0	1	1	1	0	1	1	1	0.375	0.25	0.5
Streptococcus sp. oral taxon 061	0	0	1	0	0	0	0	0	0	0	0	0	0	0	0	0	0	0	0	0	0	1	1	1	0	0	1	1	1	1	1	1	0	1	0	1	1	0	1	1	0.375	0.05	0.7
Streptococcus sp. oral taxon 074	0	0	0	0	0	0	0	0	0	0	0	1	0	0	0	0	1	0	0	1	0	1	1	1	1	0	0	0	1	1	0	1	0	1	0	1	0	1	1	1	0.375	0.15	0.6
Leptotrichia hofstadii	1	0	0	0	0	0	0	0	0	0	1	1	0	0	0	0	0	0	0	0	0	1	0	0	1	1	0	1	0	1	0	1	1	1	1	1	0	1	0	1	0.375	0.15	0.6
Leptotrichia shahii	0	0	1	0	0	0	1	0	1	0	0	0	0	0	1	0	1	0	0	1	0	0	0	0	1	0	0	1	1	1	0	0	1	0	1	1	0	1	1	0	0.375	0.3	0.45
Actinomyces sp. oral taxon 180	0	0	1	0	0	0	0	0	1	0	0	0	0	0	0	0	0	0	1	0	0	0	1	0	1	0	0	1	1	1	1	1	0	0	1	1	1	0	1	0	0.35	0.15	0.55
Alloprevotella sp. oral taxon 308	0	0	1	0	0	0	1	1	1	0	1	1	1	0	1	0	0	0	0	0	1	0	0	0	1	0	0	0	1	0	0	0	0	1	0	0	0	1	0	1	0.35	0.4	0.3
Prevotella maculosa	1	0	1	0	0	0	1	1	0	0	1	1	0	0	0	0	0	1	1	0	0	0	0	0	1	1	0	1	0	0	0	0	1	0	0	1	0	1	0	0	0.35	0.4	0.3
Prevotella veroralis	0	0	1	1	0	1	1	0	1	0	0	0	1	0	0	0	0	1	1	0	0	0	0	0	0	0	0	0	0	1	0	0	1	1	1	1	0	1	0	0	0.35	0.4	0.3
Streptococcus anginosus	0	1	1	1	0	1	1	0	1	0	1	1	0	0	0	0	0	1	1	0	0	0	0	0	0	0	0	0	0	1	0	1	0	1	1	0	0	0	0	0	0.35	0.5	0.2
Oribacterium asaccharolyticum	0	0	0	1	0	0	0	0	0	0	0	1	0	0	0	0	0	1	0	0	0	1	1	1	0	0	0	0	1	1	0	0	0	1	1	1	1	1	0	1	0.35	0.15	0.55
Filifactor alocis	1	1	1	0	1	0	0	0	1	0	1	1	0	0	1	0	0	1	0	0	0	0	0	0	0	0	0	1	0	0	0	0	0	1	1	0	0	1	1	0	0.35	0.45	0.25
Fusobacterium nucleatum subsp. nucleatum	1	0	0	0	1	0	0	0	1	0	1	0	1	1	0	0	1	1	0	0	0	1	0	0	0	0	0	0	0	1	0	0	1	0	1	0	0	1	1	0	0.35	0.4	0.3
Leptotrichia sp. oral taxon 219	0	1	0	0	0	1	0	1	1	0	0	1	1	0	1	0	1	0	1	0	1	0	0	0	0	1	0	0	0	1	0	0	1	0	0	1	0	0	0	0	0.35	0.45	0.25
Leptotrichia sp. oral taxon 498	0	0	1	0	0	0	0	0	1	0	0	1	0	0	0	0	0	0	0	0	0	1	0	1	0	1	0	1	0	1	0	0	1	1	0	1	0	1	1	1	0.35	0.15	0.55
Leptotrichia trevisanii	1	1	0	1	1	0	0	1	0	0	1	1	0	1	1	0	0	1	1	0	0	0	0	0	0	1	0	0	0	0	0	0	1	0	0	0	0	0	1	0	0.35	0.55	0.15
TM7 [G-1] sp. oral taxon 352	0	0	0	0	0	0	1	1	1	0	0	1	0	0	1	0	0	1	1	0	1	0	1	0	0	0	0	0	1	0	1	0	0	0	1	0	1	0	0	1	0.35	0.35	0.35
Treponema denticola	1	0	1	0	1	0	0	0	1	0	1	1	0	0	1	0	0	1	0	0	0	0	0	0	0	0	0	1	0	0	0	0	0	1	1	0	0	1	1	1	0.35	0.4	0.3
Actinomyces sp. oral taxon 175	0	1	0	0	0	0	0	0	1	0	0	0	0	0	1	0	0	0	1	0	0	0	0	0	1	1	1	0	0	1	0	1	1	0	1	0	0	1	1	0	0.325	0.2	0.45
Atopobium rimae	0	1	0	0	0	0	0	0	1	0	1	1	1	0	1	0	0	0	1	0	0	0	0	0	0	0	0	1	0	0	0	0	1	1	1	0	0	1	0	1	0.325	0.35	0.3
Bacteroidales [G-2] sp. oral taxon 274	1	0	0	0	0	1	0	0	1	0	1	1	1	0	1	0	0	0	0	0	0	0	1	0	1	1	0	0	0	0	0	0	1	0	1	0	0	0	1	0	0.325	0.35	0.3
Prevotella sp. oral taxon 317	1	0	1	0	0	0	0	0	1	0	1	0	0	0	0	0	0	0	0	0	0	1	0	0	1	1	0	0	0	0	0	0	1	1	1	1	0	1	1	0	0.325	0.2	0.45
Capnocytophaga gingivalis nov 90.68%	1	0	0	1	0	0	1	1	1	0	1	0	0	0	1	0	0	0	0	0	0	0	0	0	0	0	0	0	0	1	1	0	1	0	0	1	1	0	1	0	0.325	0.35	0.3
Capnocytophaga sp. oral taxon 332	1	0	0	0	0	0	0	0	0	0	0	0	0	0	1	0	0	0	0	0	1	1	0	0	1	1	0	1	0	1	1	0	1	0	0	1	0	1	1	0	0.325	0.1	0.55
Streptococcus multispecies spp42 2	0	0	0	0	0	0	0	1	0	0	1	1	0	0	0	0	0	0	0	1	0	0	1	0	1	0	1	0	1	1	1	1	0	0	0	1	0	1	0	0	0.325	0.2	0.45
Lachnospiraceae [G] sp. Oral Taxon B32	1	0	1	0	1	0	1	0	1	0	0	0	0	0	0	0	0	0	0	0	1	0	0	0	1	1	0	1	0	0	0	1	0	0	1	0	0	1	1	0	0.325	0.25	0.4
Megasphaera micronuciformis	0	0	1	1	0	0	1	0	1	0	0	1	0	0	0	0	1	1	1	0	0	0	0	0	0	0	1	0	0	0	0	0	0	1	1	0	0	1	0	1	0.325	0.4	0.25
Campylobacter gracilis	0	0	0	0	0	0	1	0	1	0	0	1	0	0	0	0	0	0	0	0	0	0	1	0	1	1	1	0	0	1	0	0	1	0	1	1	0	1	1	0	0.325	0.15	0.5
TM7 [G-1] sp. oral taxon 346	1	0	1	0	0	0	0	0	1	0	1	1	0	0	0	0	0	0	0	0	0	1	1	0	0	1	0	0	0	0	0	0	1	0	1	1	0	0	1	1	0.325	0.25	0.4
Prevotella sp. oral taxon 475	0	0	0	0	0	0	0	1	1	0	1	1	0	0	1	0	0	1	1	0	0	0	0	0	1	0	0	0	0	0	0	0	1	0	1	1	0	1	0	0	0.3	0.35	0.25
Streptococcus constellatus	1	1	0	0	1	1	0	0	0	0	0	1	1	1	1	0	0	0	1	0	0	0	0	0	0	0	0	0	0	1	0	0	0	0	1	0	0	0	1	0	0.3	0.45	0.15
Fusobacterium multispecies spp20 2	1	0	0	0	1	0	1	0	0	0	1	1	0	0	1	0	0	0	0	1	0	0	0	0	0	0	0	0	0	0	0	0	1	1	0	1	0	1	0	1	0.3	0.35	0.25
Fusobacterium sp. oral taxon 203	0	1	0	0	1	0	0	0	0	0	1	1	0	0	1	0	0	0	1	0	0	1	1	0	0	0	1	0	0	0	0	1	1	1	0	0	0	0	0	0	0.3	0.3	0.3
Delftia acidovorans	1	0	0	1	0	0	1	1	0	0	0	1	0	0	0	1	1	1	0	0	0	1	0	0	0	0	0	1	0	0	0	1	0	0	0	0	1	0	0	0	0.3	0.4	0.2
Campylobacter sp. oral taxon 044	1	0	1	0	1	0	1	0	1	0	1	1	0	0	0	0	0	1	1	1	0	0	0	0	0	0	0	0	0	0	0	0	0	0	1	0	0	1	0	0	0.3	0.5	0.1
Haemophilus sp. oral taxon 908	0	0	1	1	1	1	0	0	1	0	0	0	0	0	1	0	0	0	1	0	1	1	0	0	1	0	0	0	0	1	0	0	0	0	0	0	0	0	1	0	0.3	0.35	0.25
Pseudomonas pseudoalcaligenes	1	0	1	1	0	1	0	0	1	0	0	0	0	0	1	0	0	1	1	1	0	0	0	0	0	0	0	1	0	0	0	1	0	0	1	0	0	0	0	0	0.3	0.45	0.15
Treponema socranskii	0	1	0	0	1	0	0	0	1	0	1	1	1	0	1	0	0	1	0	0	0	0	0	0	1	1	0	0	0	0	0	0	0	1	1	0	0	0	0	0	0.3	0.4	0.2
Treponema sp. oral taxon 237	1	0	0	0	1	0	1	0	1	0	1	0	0	0	0	0	1	1	0	0	0	0	0	0	1	0	0	0	0	0	0	0	1	1	1	0	0	0	1	0	0.3	0.35	0.25
Prevotella denticola nov 93.27%	0	1	0	0	1	0	0	0	0	0	1	0	0	0	0	0	0	0	0	0	0	0	0	0	0	0	1	1	1	0	0	0	1	1	0	1	0	1	0	1	0.275	0.15	0.4
Prevotella shahii	1	0	0	0	1	0	1	0	1	0	1	1	0	0	0	0	0	0	0	1	0	0	1	0	0	0	0	0	0	0	1	0	0	0	1	1	0	0	0	0	0.275	0.35	0.2
Bergeyella sp. oral taxon 900	0	1	0	1	0	0	0	0	1	0	1	0	0	0	0	0	0	1	1	0	0	0	0	0	1	1	0	1	0	0	0	0	1	0	0	1	0	0	0	0	0.275	0.3	0.25
Capnocytophaga gingivalis nov 96.25%	0	0	0	0	0	0	0	1	1	0	1	1	0	0	0	0	0	0	1	0	0	0	0	0	0	1	0	1	0	1	1	0	0	0	0	1	0	0	1	0	0.275	0.25	0.3
Clostridiales [F-1][G-1] sp. oral taxon 093	0	0	0	0	1	0	1	0	1	0	1	0	0	0	1	0	1	1	0	0	0	0	0	0	0	0	0	1	0	0	0	0	0	0	1	0	0	1	1	0	0.275	0.35	0.2
Lachnospiraceae [G-8] sp. oral taxon 500	0	1	0	0	1	0	0	0	1	0	1	1	0	0	0	0	0	1	0	0	0	0	0	0	0	0	0	1	0	0	0	0	0	0	1	0	1	1	1	0	0.275	0.3	0.25
Leptotrichia sp. oral taxon 219 nov 86.82%	1	0	1	0	1	0	0	0	1	0	1	0	0	0	1	0	0	1	0	1	0	1	0	0	0	0	0	1	0	0	0	0	0	0	1	0	0	0	0	0	0.275	0.4	0.15
Aggregatibacter sp. oral taxon 458	1	0	0	0	0	0	0	0	0	0	1	0	0	0	0	0	0	0	0	0	0	0	0	0	1	1	1	1	0	0	0	0	1	0	0	1	0	1	1	1	0.275	0.1	0.45
TM7 [G-5] sp. oral taxon 356	0	0	1	0	0	0	0	0	0	0	1	0	0	0	0	0	0	0	0	0	0	0	0	1	0	0	1	0	0	0	0	0	1	1	1	1	0	1	1	1	0.275	0.1	0.45
Actinomyces sp. oral taxon 172	0	0	1	0	0	0	0	0	0	0	0	1	0	0	0	0	0	0	0	0	0	0	1	0	1	0	0	0	1	0	0	0	0	1	1	0	1	0	1	1	0.25	0.1	0.4
Porphyromonas sp. oral taxon 285	1	1	0	0	1	0	1	0	1	0	1	1	0	0	0	0	0	0	1	0	0	1	0	0	0	0	0	0	0	0	0	0	0	0	0	0	1	0	0	0	0.25	0.4	0.1
Alloprevotella sp. oral taxon 473 nov 97.57%	1	0	1	0	0	0	0	0	1	0	1	0	0	0	1	0	0	0	0	0	0	0	0	0	0	0	0	0	1	1	0	0	0	0	1	1	1	0	0	0	0.25	0.25	0.25
Prevotella sp. oral taxon 300	1	0	1	0	0	0	1	0	0	1	0	1	1	0	0	0	0	0	0	0	1	0	0	0	0	0	1	0	0	0	0	0	0	1	0	0	0	1	0	0	0.25	0.3	0.2
Prevotella sp. oral taxon 306	1	0	1	1	0	0	0	0	0	0	0	1	1	0	0	0	1	0	0	0	0	0	0	0	0	0	0	0	0	1	0	0	1	1	0	0	0	1	0	0	0.25	0.3	0.2
Prevotella sp. oral taxon 315	1	0	0	0	0	0	0	1	1	0	1	0	0	0	1	0	0	0	1	0	0	0	0	0	0	0	0	0	0	0	0	0	1	1	1	0	0	1	0	0	0.25	0.3	0.2
Bergeyella sp. oral taxon 931	0	0	0	0	0	0	0	0	0	0	0	0	0	0	0	0	0	0	0	0	1	1	0	0	1	0	0	1	0	1	0	0	1	0	1	0	1	1	1	0	0.25	0	0.5
Capnocytophaga sp. oral taxon 863	0	0	0	0	0	0	0	0	1	0	0	0	0	0	1	0	0	0	0	0	0	0	0	0	1	0	0	0	0	1	1	0	1	0	1	1	0	1	1	0	0.25	0.1	0.4
Oribacterium sp. oral taxon 078	0	0	1	0	0	0	1	0	1	0	0	0	0	0	0	0	0	0	1	0	0	0	0	1	0	0	1	0	0	0	0	1	0	1	0	0	0	1	0	1	0.25	0.2	0.3
Peptostreptococcaceae [XI][G-1] [Eubacterium] sulci	0	1	0	0	0	0	0	1	0	0	1	1	0	0	0	0	0	0	1	0	0	0	0	0	0	0	0	0	1	0	0	0	0	1	0	0	1	1	0	1	0.25	0.25	0.25
Peptostreptococcaceae [XI][G-7] sp. oral taxon 081	0	0	0	0	1	1	1	0	1	0	1	0	0	0	1	0	0	1	0	1	0	0	0	0	0	0	0	0	0	0	0	0	0	0	1	0	0	0	1	0	0.25	0.4	0.1
Mycoplasma salivarium	0	1	0	1	1	1	0	0	0	1	0	0	0	0	0	0	1	1	1	0	0	0	0	0	0	0	1	0	0	0	0	1	0	0	0	0	0	0	0	0	0.25	0.4	0.1
Fusobacteria [G-1] sp. Oral Taxon A71	0	0	0	0	1	0	0	0	1	0	0	0	0	1	0	0	0	1	0	0	0	0	0	0	0	0	1	1	0	1	0	0	0	1	0	1	0	1	0	0	0.25	0.2	0.3
Leptotrichia sp. oral taxon 215 nov 96.76%	1	0	0	0	0	0	0	0	1	0	0	0	0	0	1	0	0	0	0	1	0	0	0	0	0	1	0	0	1	0	1	0	0	0	0	1	1	0	0	1	0.25	0.2	0.3
GN02 [G-2] sp. oral taxon 873	1	0	0	0	1	0	0	0	1	0	1	0	0	0	1	0	0	0	0	0	1	1	0	0	0	1	0	0	0	0	1	0	0	0	0	0	0	0	1	0	0.25	0.25	0.25
Ottowia sp. oral taxon 894	0	0	0	0	0	0	0	1	1	0	0	0	1	0	1	0	0	0	0	0	0	0	0	0	1	1	0	1	0	0	1	0	0	0	0	0	0	0	1	1	0.25	0.2	0.3
Acinetobacter baumannii	0	0	1	1	0	1	0	0	1	0	0	0	0	0	1	0	1	1	0	0	0	0	0	0	0	0	0	0	0	0	0	1	0	0	1	0	0	0	1	0	0.25	0.35	0.15
Moraxella sp. Oral Taxon B07	1	0	0	0	0	0	0	0	1	0	0	0	0	0	1	0	0	0	0	0	0	0	0	0	1	0	0	0	0	1	1	1	1	0	0	1	0	0	1	0	0.25	0.15	0.35
Fretibacterium fastidiosum	0	1	1	0	1	0	0	0	0	0	1	0	0	0	0	0	1	1	0	0	0	0	0	0	0	0	0	0	0	0	0	0	0	1	1	0	0	1	1	0	0.25	0.3	0.2
Micrococcus luteus	0	0	0	0	0	1	1	1	0	0	0	0	0	1	0	1	0	1	0	1	0	0	0	0	0	0	0	1	0	1	0	0	0	0	0	0	0	0	0	0	0.225	0.35	0.1
Porphyromonas sp. oral taxon 278	0	0	0	0	1	0	0	1	0	0	1	0	1	0	1	0	0	0	0	0	0	0	0	0	1	1	0	0	0	0	0	0	1	0	0	0	0	0	1	0	0.225	0.25	0.2
Alloprevotella rava	0	0	1	1	0	0	0	0	0	0	0	1	0	0	0	0	0	1	0	0	0	1	0	0	0	0	0	1	0	0	0	0	0	0	1	1	0	1	0	0	0.225	0.2	0.25
Alloprevotella sp. oral taxon 913	0	0	0	0	0	0	1	0	1	0	1	0	0	0	1	0	0	1	0	1	0	0	0	0	1	0	0	0	0	0	0	0	0	0	0	1	0	0	1	0	0.225	0.3	0.15
Prevotella multiformis	0	0	0	0	0	0	0	0	1	0	0	0	0	0	0	0	0	1	1	0	0	0	0	0	0	0	1	0	0	0	0	0	1	1	0	1	0	1	1	0	0.225	0.15	0.3
Prevotella sp. oral taxon 304	0	0	0	0	0	0	0	0	1	0	0	0	0	0	0	0	1	1	0	0	0	0	0	0	0	0	1	1	0	0	0	0	0	0	1	1	0	1	1	0	0.225	0.15	0.3
Prevotella sp. oral taxon 443	0	0	0	0	1	0	1	0	1	0	0	0	0	0	1	0	0	1	0	0	0	0	0	0	0	0	0	0	0	0	0	0	0	0	1	1	0	1	1	0	0.225	0.25	0.2
Capnocytophaga sp. oral taxon 326	0	0	0	0	0	0	0	0	0	0	1	0	0	0	0	0	0	0	0	0	0	0	1	1	1	1	0	0	0	1	0	0	1	0	0	1	0	0	1	0	0.225	0.05	0.4
Staphylococcus epidermidis	0	0	1	0	0	1	1	0	0	0	0	1	0	1	0	0	1	0	0	0	0	1	0	0	0	0	0	0	0	0	0	1	0	0	0	0	1	0	0	0	0.225	0.3	0.15
Streptococcus sp. oral taxon 074 nov 97.79%	1	0	0	0	0	0	0	1	1	0	0	0	0	0	0	0	0	0	0	0	0	0	1	1	0	0	0	1	0	0	0	0	0	1	0	0	0	1	0	1	0.225	0.15	0.3
Oribacterium multispecies spp18 2	0	0	0	0	0	0	1	0	0	0	0	1	0	0	0	0	0	1	1	1	0	0	1	1	0	0	0	0	1	0	0	0	0	0	0	0	0	0	0	1	0.225	0.25	0.2
Peptostreptococcaceae [XI][G-9] [Eubacterium] brachy	1	0	0	0	1	1	0	0	0	0	1	1	0	0	0	0	0	0	0	0	0	0	0	0	0	0	1	1	0	0	0	0	0	1	1	0	0	0	0	0	0.225	0.25	0.2
Dialister pneumosintes	1	1	0	0	1	0	0	0	1	0	0	0	0	0	1	0	1	0	1	0	0	0	0	0	0	0	0	0	0	0	0	0	0	1	1	0	0	0	0	0	0.225	0.35	0.1
Leptotrichia sp. oral taxon 221 nov 87.61%	1	0	1	1	1	1	0	0	1	0	1	0	0	0	0	0	0	0	1	0	0	0	0	0	1	0	0	0	0	0	0	0	0	0	0	0	0	0	0	0	0.225	0.4	0.05
Leptotrichia sp. oral taxon 463	1	0	0	0	0	0	0	0	0	0	1	1	0	0	0	0	0	0	0	0	0	0	0	0	1	1	0	0	0	1	0	0	1	0	0	1	0	0	1	0	0.225	0.15	0.3
Neisseria bacilliformis	1	0	1	0	0	1	1	0	0	0	0	0	1	0	0	0	1	0	0	0	1	0	0	0	0	1	0	0	0	0	0	0	0	0	0	0	0	1	0	0	0.225	0.3	0.15
Campylobacter rectus	1	1	0	0	0	0	0	0	1	0	0	0	0	0	0	0	0	1	0	0	0	0	0	0	0	0	0	1	0	0	0	0	0	1	1	0	0	1	1	0	0.225	0.2	0.25
Cardiobacterium hominis	0	0	0	0	0	0	0	1	1	0	0	0	0	0	1	0	0	0	0	0	0	0	0	0	1	1	0	0	0	0	0	0	1	1	1	0	0	0	1	0	0.225	0.15	0.3
SR1 [G-1] sp. oral taxon 875	0	0	0	0	1	0	0	0	1	0	1	0	0	0	0	0	0	0	0	0	0	0	0	0	1	0	0	0	1	0	1	0	0	0	1	1	1	0	0	0	0.225	0.15	0.3
TM7 [G-1] sp. oral taxon 347	0	0	0	0	0	0	1	0	1	0	0	0	0	0	0	0	0	0	0	0	0	1	0	0	1	1	0	1	0	1	0	0	1	0	1	0	0	0	0	0	0.225	0.1	0.35
Treponema sp. oral taxon 258	1	0	0	0	1	0	0	0	1	0	1	1	0	1	1	0	0	1	0	0	0	0	0	0	0	0	0	0	0	0	0	0	0	0	1	0	0	0	0	0	0.225	0.4	0.05
Actinomyces sp. oral taxon 169	0	0	0	0	0	0	1	0	0	0	0	1	0	0	1	0	0	0	0	0	0	0	0	1	0	0	0	0	0	1	0	1	0	0	1	0	0	0	1	0	0.2	0.15	0.25
Corynebacterium multispecies spp24 2	0	0	0	1	0	0	0	1	1	0	0	0	0	1	0	0	0	0	0	0	0	0	0	0	0	0	0	0	0	1	0	1	0	0	0	0	1	0	1	0	0.2	0.2	0.2
Corynebacterium durum	0	0	0	0	0	0	0	0	0	0	0	0	0	0	1	0	0	0	0	0	0	1	0	0	1	1	0	1	0	1	0	0	1	0	0	0	0	0	1	0	0.2	0.05	0.35
Microbacterium flavescens nov 87.63%	0	0	0	0	0	0	0	0	0	0	0	0	0	0	0	0	0	0	0	1	0	0	0	0	0	0	1	0	1	0	1	0	0	1	0	1	0	1	0	1	0.2	0.05	0.35
Porphyromonas sp. oral taxon 275	0	0	0	0	0	1	0	1	1	0	0	0	0	0	0	1	0	0	1	0	0	0	0	0	0	0	0	0	0	0	0	0	1	0	0	1	0	0	1	0	0.2	0.25	0.15
Prevotella dentalis	0	0	0	0	1	0	0	0	0	0	1	1	0	0	0	0	0	1	0	0	0	0	0	0	0	0	0	1	0	1	0	0	1	0	0	0	0	0	1	0	0.2	0.2	0.2
Prevotella saccharolytica	0	0	0	0	0	1	0	0	1	0	0	0	0	0	1	0	0	0	0	0	0	1	0	0	1	1	0	0	0	0	0	0	1	0	1	0	0	0	0	0	0.2	0.15	0.25
Prevotella sp. oral taxon 305 nov 94.13%	0	0	0	1	0	0	1	0	0	0	0	0	0	0	0	0	1	1	0	0	0	0	0	0	1	0	0	0	0	0	0	0	0	1	0	0	1	0	0	1	0.2	0.2	0.2
Bergeyella sp. oral taxon 931 nov 92.95%	0	0	0	0	0	0	0	0	0	0	0	0	0	0	0	0	0	0	0	0	0	1	0	0	1	0	0	1	1	0	1	0	1	0	1	1	0	0	0	0	0.2	0	0.4
Capnocytophaga sp. oral taxon 336	1	0	0	0	0	0	1	0	1	0	1	0	0	0	0	0	0	0	1	0	0	0	0	0	0	1	0	0	0	0	0	0	1	0	0	0	0	1	0	0	0.2	0.25	0.15
Streptococcus sp. oral taxon 057	0	0	1	0	0	0	0	0	0	0	1	0	0	0	0	0	0	0	0	0	0	0	1	1	0	0	0	0	1	0	0	0	0	1	0	1	0	1	0	0	0.2	0.1	0.3
Streptococcus sp. oral taxon 070	1	0	0	0	0	0	0	0	0	0	0	0	0	0	0	0	0	0	0	0	0	0	0	1	0	0	0	0	0	1	0	0	1	1	1	1	0	0	0	1	0.2	0.05	0.35
Catonella sp. oral taxon 451	0	0	0	0	1	0	0	0	1	0	1	1	0	0	1	0	0	1	0	0	0	0	0	0	0	0	0	0	0	0	0	0	0	0	1	0	0	0	1	0	0.2	0.3	0.1
Johnsonella sp. oral taxon 166	0	0	0	0	0	0	0	0	0	0	0	0	0	0	1	0	0	1	0	0	0	0	0	0	0	0	0	1	0	0	0	0	1	0	1	1	0	1	1	0	0.2	0.1	0.3
Finegoldia magna	0	0	0	0	0	0	0	0	0	1	0	1	1	1	0	0	1	1	0	0	1	0	0	0	0	0	0	0	0	0	0	0	0	0	0	0	1	0	0	0	0.2	0.3	0.1
Mogibacterium timidum	0	0	0	0	0	0	0	0	0	0	0	1	0	0	1	0	0	1	1	0	0	0	0	0	0	0	0	0	0	1	0	0	0	1	1	0	0	0	1	0	0.2	0.2	0.2
Peptostreptococcaceae [XI][G-1] [Eubacterium] infirmum	0	1	0	0	0	0	0	0	1	0	0	1	1	0	0	0	1	1	1	0	0	0	0	0	0	0	0	0	0	0	0	0	0	0	0	0	0	0	1	0	0.2	0.35	0.05
Peptostreptococcaceae [XI][G-2] sp. oral taxon 091	1	1	0	0	1	1	0	0	0	0	0	0	0	0	1	0	0	1	1	0	0	0	0	0	0	0	0	0	0	0	0	0	0	0	1	0	0	0	0	0	0.2	0.35	0.05
Mycoplasma faucium	0	0	1	0	1	0	0	0	1	0	0	0	0	0	0	0	1	1	0	0	0	0	0	0	0	0	0	0	0	0	0	0	0	1	1	0	0	1	0	0	0.2	0.25	0.15
Leptotrichia sp. Oral Taxon B57	0	0	1	0	1	0	0	0	0	0	0	0	0	0	0	0	0	1	0	0	0	0	0	0	0	0	0	0	0	0	0	0	1	0	1	1	0	1	1	0	0.2	0.15	0.25
Cardiobacterium valvarum	1	0	0	0	0	0	0	0	1	0	0	0	1	0	0	0	0	0	0	0	0	0	0	0	1	1	0	0	0	0	0	0	1	0	0	0	0	1	1	0	0.2	0.15	0.25
Haemophilus parainfluenzae nov 97.14%	0	0	0	0	0	0	0	0	0	0	0	0	0	0	0	0	0	0	0	0	0	0	1	1	0	0	1	0	1	0	0	0	0	1	0	1	0	1	0	1	0.2	0	0.4
Pseudomonas gingeri	1	0	1	0	0	0	0	0	0	0	0	1	1	0	0	1	0	0	0	0	1	0	0	0	0	0	0	1	0	0	0	0	0	0	1	0	0	0	0	0	0.2	0.25	0.15
Treponema lecithinolyticum	1	0	0	0	1	0	0	0	1	0	0	0	0	0	1	0	1	1	0	0	0	0	0	0	0	0	0	0	0	0	0	0	0	1	1	0	0	0	0	0	0.2	0.3	0.1
Treponema maltophilum	0	0	0	0	1	0	0	0	1	0	1	1	0	0	1	0	0	1	0	0	0	0	0	0	1	0	0	0	0	0	0	0	0	0	1	0	0	0	0	0	0.2	0.3	0.1
Treponema medium	0	0	0	0	1	0	0	0	1	0	1	1	0	0	0	0	0	1	0	0	0	0	0	0	0	0	0	0	0	0	1	0	1	0	1	0	0	0	0	0	0.2	0.25	0.15
Treponema sp. oral taxon 262	0	0	0	0	0	0	0	0	0	0	1	0	0	0	0	0	1	1	1	0	0	0	0	0	0	0	0	0	0	0	0	0	1	1	1	0	0	0	1	0	0.2	0.2	0.2
Fretibacterium sp. oral taxon 360	0	0	1	0	1	0	0	0	1	0	1	0	0	0	0	0	0	0	0	0	0	0	0	0	0	0	0	1	0	0	0	0	0	1	1	0	0	0	1	0	0.2	0.2	0.2
Alloscardovia omnicolens	1	0	0	1	0	1	1	0	0	0	0	1	0	0	0	0	0	1	1	0	0	0	0	0	0	0	0	0	0	0	0	0	0	0	0	0	0	0	0	0	0.175	0.35	0
Scardovia wiggsiae	0	0	0	0	1	0	1	1	0	0	0	1	0	0	0	0	0	0	1	0	0	0	0	0	0	0	0	0	0	0	0	0	0	0	0	1	0	1	0	0	0.175	0.25	0.1
Bacteroidetes [G-3] sp. oral taxon 280	0	1	1	0	0	0	0	0	0	0	1	0	0	0	0	0	0	1	0	0	0	0	0	0	0	0	0	0	0	0	0	0	0	0	1	0	0	1	1	0	0.175	0.2	0.15
Bacteroidetes [G-5] sp. oral taxon 511	0	0	0	0	0	0	0	0	0	0	1	0	0	0	1	0	1	1	0	0	0	0	0	0	0	0	0	0	0	0	0	0	1	0	1	0	0	1	0	0	0.175	0.2	0.15
Tannerella forsythia	1	1	0	0	0	0	0	0	0	0	0	0	0	0	0	0	0	0	0	0	0	0	0	0	0	0	0	0	0	1	0	1	0	1	1	0	0	1	0	0	0.175	0.1	0.25
Prevotella baroniae	1	0	0	0	1	0	0	0	0	0	0	0	0	0	1	0	0	1	1	0	0	0	0	0	0	0	0	0	0	0	0	0	0	0	1	1	0	0	0	0	0.175	0.25	0.1
Prevotella sp. oral taxon 472	1	0	0	0	0	0	0	0	1	0	0	0	0	0	1	0	0	0	0	0	0	0	0	0	1	1	0	0	0	1	0	0	1	0	0	0	0	0	0	0	0.175	0.15	0.2
Prevotella sp. oral taxon 526	0	1	0	0	0	0	0	0	1	0	0	0	0	0	0	0	0	1	0	0	0	0	0	0	0	0	0	1	0	0	0	0	0	0	1	0	0	1	1	0	0.175	0.15	0.2
Prevotella sp. oral taxon 942	0	0	1	0	0	0	0	0	1	0	0	0	1	0	1	0	0	1	1	0	0	0	0	0	0	0	0	0	0	0	0	0	0	0	1	0	0	0	0	0	0.175	0.3	0.05
Prevotella veroralis nov 97.35%	0	0	0	0	0	0	0	0	0	0	0	0	0	1	0	0	1	1	0	0	0	0	0	0	0	0	0	1	0	0	0	0	1	0	0	0	0	1	0	1	0.175	0.15	0.2
Capnocytophaga gingivalis nov 97.90%	0	0	0	0	0	0	0	0	0	0	0	0	0	0	1	0	0	0	0	0	0	0	0	0	1	0	0	0	0	1	1	0	0	0	0	1	0	1	1	0	0.175	0.05	0.3
Capnocytophaga sp. oral taxon 864	0	0	0	0	0	0	1	0	1	0	0	1	0	0	0	0	0	0	1	0	0	0	0	0	0	0	0	0	0	0	0	1	1	0	0	1	0	0	0	0	0.175	0.2	0.15
Lachnospiraceae [G-2] sp. oral taxon 088 nov 93.15%	0	1	0	0	1	0	0	0	0	0	1	0	0	0	0	0	0	1	0	1	0	0	0	0	0	0	0	1	0	0	0	0	0	0	1	0	0	0	0	0	0.175	0.25	0.1
Parvimonas sp. oral taxon 110 nov 97.29%	0	0	0	0	0	0	1	0	1	0	1	0	0	0	0	0	0	0	0	0	0	0	1	0	0	0	0	0	0	0	0	0	0	0	0	1	1	0	0	1	0.175	0.15	0.2
Peptostreptococcaceae [XI][G-7] [Eubacterium] yurii subsps. yurii & margaretiae	1	0	0	0	1	0	0	0	1	0	1	0	0	0	1	0	0	0	0	0	0	0	0	0	0	1	0	0	0	0	0	0	0	0	1	0	0	0	0	0	0.175	0.25	0.1
Veillonella sp. Oral Taxon C09	0	0	0	0	0	0	0	0	0	0	0	0	0	0	0	0	0	0	0	0	0	0	0	1	0	0	1	0	1	1	0	0	0	1	0	0	0	1	0	1	0.175	0	0.35
Selenomonas dianae	0	1	0	0	1	0	0	0	1	0	1	0	0	0	0	0	0	0	0	0	0	0	0	0	0	0	0	0	0	0	0	0	1	0	1	0	0	0	0	1	0.175	0.2	0.15
Selenomonas infelix	0	0	0	0	1	0	0	1	1	0	0	0	1	0	0	0	0	1	0	0	0	0	0	0	0	0	0	0	0	0	0	0	1	0	1	0	0	0	0	0	0.175	0.25	0.1
Leptotrichia sp. oral taxon 223	0	0	1	0	0	0	0	0	0	0	1	1	1	0	0	0	0	0	0	0	0	0	0	0	0	1	0	0	0	0	0	0	0	0	0	1	0	1	0	0	0.175	0.2	0.15
Enterobacter cloacae	0	0	0	0	1	0	0	0	0	1	0	0	0	0	0	1	1	0	0	0	0	1	1	0	0	0	0	0	0	0	0	1	0	0	0	0	0	0	0	0	0.175	0.2	0.15
Stenotrophomonas maltophilia	0	0	0	0	0	0	1	0	1	0	0	0	0	0	1	1	0	1	0	1	0	0	0	0	0	0	0	0	0	0	0	1	0	0	0	0	0	0	0	0	0.175	0.3	0.05
TM7 [G-3] sp. oral taxon 351	0	0	0	0	0	0	0	0	1	0	0	0	0	0	0	0	0	0	1	0	0	0	1	0	0	0	0	0	1	0	0	0	1	1	0	0	0	0	0	1	0.175	0.1	0.25
Treponema pectinovorum	1	1	0	0	1	0	0	0	0	0	1	1	0	0	0	0	0	1	0	0	0	0	0	0	0	0	0	0	0	0	0	0	0	0	1	0	0	0	0	0	0.175	0.3	0.05
Treponema sp. oral taxon 231	1	0	0	0	0	0	0	0	1	0	1	1	0	0	1	0	0	1	0	0	0	0	0	0	0	0	0	0	0	0	0	0	0	0	1	0	0	0	0	0	0.175	0.3	0.05
Manihot esculenta Oral Taxon C60	0	0	0	0	0	1	0	0	1	1	0	0	0	1	0	0	0	0	0	0	0	0	0	0	0	0	1	1	0	0	0	1	0	0	0	0	0	0	0	0	0.175	0.2	0.15
Actinomyces meyeri	0	0	0	0	0	0	0	0	0	0	0	1	0	0	0	0	0	0	0	0	0	0	1	1	0	0	0	0	0	0	0	0	0	0	1	0	0	1	1	0	0.15	0.05	0.25
Atopobium sp. oral taxon 199	0	1	0	0	1	0	0	0	1	0	0	1	0	0	0	0	0	1	1	0	0	0	0	0	0	0	0	0	0	0	0	0	0	0	0	0	0	0	0	0	0.15	0.3	0
Porphyromonas pasteri	0	0	0	0	0	0	0	0	0	0	0	0	0	0	0	0	0	0	0	0	0	0	1	0	1	0	0	0	1	0	1	0	0	0	0	1	1	0	0	0	0.15	0	0.3
Porphyromonas sp. oral taxon 277	0	0	0	0	0	0	0	0	1	0	1	0	0	0	0	0	0	0	0	0	0	1	0	0	1	0	0	0	0	1	0	0	0	0	0	1	0	0	0	0	0.15	0.1	0.2
Alloprevotella sp. oral taxon 912	0	0	0	0	0	0	1	0	0	0	1	0	0	0	1	0	0	1	0	1	0	0	0	0	0	0	0	0	0	0	0	0	1	0	0	0	0	0	0	0	0.15	0.25	0.05
Prevotella micans	0	1	0	0	0	0	0	0	0	0	1	0	0	0	0	0	0	0	0	0	0	0	0	0	1	1	0	0	0	1	0	0	1	0	0	0	0	0	0	0	0.15	0.1	0.2
Capnocytophaga sp. oral taxon 412	0	0	0	0	0	0	1	0	0	0	1	0	1	0	0	0	0	0	0	0	0	1	0	0	0	0	0	0	0	0	0	0	1	0	0	0	0	0	0	1	0.15	0.15	0.15
Staphylococcus hominis	1	0	0	1	0	0	0	0	0	0	0	1	0	0	0	0	0	1	0	0	0	0	0	0	0	0	0	0	0	0	0	1	0	0	0	0	0	0	1	0	0.15	0.2	0.1
Streptococcus sinensis	1	0	1	0	0	0	0	0	1	0	0	0	0	0	0	0	0	0	0	0	0	0	0	0	1	1	0	0	0	0	0	0	1	0	0	0	0	0	0	0	0.15	0.15	0.15
Streptococcus sp. oral taxon 056	0	0	0	0	0	0	0	0	1	0	0	0	0	0	1	0	0	0	0	0	1	0	0	0	0	1	0	0	0	0	0	0	1	0	0	0	0	1	0	0	0.15	0.1	0.2
Streptococcus sp. str. C300	0	0	0	0	0	0	0	0	0	0	0	0	0	1	0	0	0	0	0	0	0	0	0	1	0	0	1	0	0	0	0	0	0	1	0	0	0	1	1	0	0.15	0.05	0.25
Lachnospiraceae [G-7] sp. oral taxon 163	0	1	1	0	0	0	0	0	1	0	0	1	0	0	0	0	0	1	1	0	0	0	0	0	0	0	0	0	0	0	0	0	0	0	0	0	0	0	0	0	0.15	0.3	0
Oribacterium sp. oral taxon 102	0	1	0	1	1	0	0	0	0	0	1	0	0	0	0	0	1	1	0	0	0	0	0	0	0	0	0	0	0	0	0	0	0	0	0	0	0	0	0	0	0.15	0.3	0
Shuttleworthia satelles	0	1	0	0	0	0	0	0	1	0	1	0	0	0	0	0	0	1	1	0	0	0	0	0	0	0	0	1	0	0	0	0	0	0	0	0	0	0	0	0	0.15	0.25	0.05
Peptostreptococcaceae [XI][G-4] sp. oral taxon 369	0	1	0	0	1	0	1	0	0	0	0	0	0	0	0	0	0	0	0	0	0	0	0	0	0	0	0	0	0	1	0	0	0	0	1	0	0	1	0	0	0.15	0.15	0.15
Peptostreptococcaceae [XI][G-5] [Eubacterium] saphenum	0	0	0	0	0	0	0	0	1	0	1	0	0	0	0	0	1	0	0	0	0	0	0	0	0	0	0	0	0	0	0	0	0	1	1	0	0	0	1	0	0.15	0.15	0.15
Ruminococcaceae [G-1] sp. oral taxon 075 nov 91.53%	0	0	0	0	0	0	0	0	0	0	0	0	0	0	0	0	0	0	0	0	0	1	0	0	0	0	0	1	1	0	0	0	0	0	1	1	1	0	0	0	0.15	0	0.3
Selenomonas noxia	1	0	1	0	0	0	0	0	1	0	0	1	0	0	0	0	0	0	0	0	0	0	0	0	0	1	0	0	0	0	0	0	1	0	0	0	0	0	0	0	0.15	0.2	0.1
Veillonella denticariosi	0	0	0	0	0	0	0	0	0	0	0	1	0	0	0	0	1	0	0	0	0	0	0	1	0	0	1	0	1	0	0	0	0	1	0	0	0	0	0	0	0.15	0.1	0.2
Fusobacterium periodonticum nov 97.14%	1	0	1	0	1	0	0	0	0	0	1	0	0	0	0	0	0	0	0	1	0	0	0	0	0	0	0	0	0	0	0	0	0	0	1	0	0	0	0	0	0.15	0.25	0.05
Leptotrichia goodfellowii	0	1	0	0	0	0	0	0	1	0	0	0	0	0	0	0	0	0	1	0	1	0	0	0	0	1	0	0	0	0	0	0	0	0	0	0	0	1	0	0	0.15	0.15	0.15
Leptotrichia sp. oral taxon 215 nov 96.98%	0	0	1	0	0	0	0	0	1	0	1	0	1	0	0	0	0	0	0	1	0	0	0	0	0	0	0	0	0	0	0	0	0	0	0	0	1	0	0	0	0.15	0.25	0.05
Streptobacillus hongkongensis	1	0	1	0	1	0	0	0	1	0	0	1	0	0	0	0	0	0	1	0	0	0	0	0	0	0	0	0	0	0	0	0	0	0	0	0	0	0	0	0	0.15	0.3	0
Kingella oralis	0	0	1	0	0	0	0	0	0	0	0	0	0	1	0	0	1	0	0	0	0	0	0	0	0	1	0	0	0	0	0	0	1	0	0	0	0	1	0	0	0.15	0.15	0.15
Neisseria oralis	0	0	0	0	0	0	0	0	0	0	0	0	0	0	0	0	0	0	0	0	0	0	0	0	1	1	0	1	1	0	0	0	0	1	0	0	0	0	1	0	0.15	0	0.3
Neisseria sp. oral taxon 020	0	0	0	0	0	0	0	0	1	0	0	0	1	0	1	0	0	0	0	0	0	0	0	0	1	0	0	0	0	0	0	0	0	0	1	0	0	0	1	0	0.15	0.15	0.15
Aggregatibacter sp. oral taxon 949	0	0	0	0	0	0	0	1	0	0	0	0	0	0	0	0	0	0	0	0	0	0	0	0	1	1	0	0	0	0	0	0	1	1	0	1	0	0	0	0	0.15	0.05	0.25
Haemophilus influenzae	1	0	1	0	1	0	1	0	0	0	1	0	0	0	0	0	0	0	1	0	0	0	0	0	0	0	0	0	0	0	0	0	0	0	0	0	0	0	0	0	0.15	0.3	0
Treponema amylovorum	0	0	0	0	0	0	0	0	1	0	1	1	0	0	1	0	0	1	0	0	0	0	0	0	0	0	0	0	0	0	0	0	0	0	1	0	0	0	0	0	0.15	0.25	0.05
Treponema sp. oral taxon 230	1	0	0	0	0	0	0	0	1	0	1	1	0	0	0	0	0	1	0	0	0	0	0	0	0	0	0	0	0	0	0	0	0	0	1	0	0	0	0	0	0.15	0.25	0.05
Treponema vincentii	0	0	0	0	1	0	0	0	1	0	1	0	0	0	1	0	0	1	0	0	0	0	0	0	0	0	0	0	0	0	0	0	0	0	1	0	0	0	0	0	0.15	0.25	0.05
Corynebacterium kroppenstedtii	0	1	0	0	0	0	0	0	0	0	0	0	0	1	1	0	0	0	0	0	0	1	0	0	0	0	0	0	0	0	0	1	0	0	0	0	0	0	0	0	0.125	0.15	0.1
Kocuria sp. oral taxon 189 nov 95.56%	0	0	0	0	0	0	0	0	1	0	0	0	0	0	0	0	1	1	0	0	0	0	0	0	0	0	0	1	0	0	0	1	0	0	0	0	0	0	0	0	0.125	0.15	0.1
Slackia exigua	0	0	0	0	0	0	0	0	1	0	0	1	0	0	0	0	0	1	0	0	0	0	0	0	0	0	0	0	0	0	0	1	0	0	1	0	0	0	0	0	0.125	0.15	0.1
Bacteroides heparinolyticus	0	0	0	0	1	0	0	0	1	0	0	0	0	1	0	0	0	1	0	0	0	0	0	0	1	0	0	0	0	0	0	0	0	0	0	0	0	0	0	0	0.125	0.2	0.05
Tannerella sp. oral taxon 808	0	1	0	0	0	0	0	0	0	0	0	1	1	0	0	0	0	0	1	0	0	0	0	0	0	0	0	0	0	0	0	0	0	0	0	0	0	0	1	0	0.125	0.2	0.05
Tannerella sp. oral taxon 916	0	0	0	0	0	0	0	0	1	0	1	0	0	0	1	0	0	0	0	0	0	0	0	0	0	0	0	0	0	0	0	0	0	0	1	0	0	1	0	0	0.125	0.15	0.1
Prevotella buccae	0	0	0	1	0	0	0	0	1	0	0	1	1	0	0	0	0	0	0	0	0	0	0	0	0	0	0	0	0	0	0	0	0	0	0	0	0	0	1	0	0.125	0.2	0.05
Prevotella pleuritidis	0	1	0	0	0	0	0	0	0	0	0	0	0	0	0	0	0	0	0	0	0	0	0	1	0	0	0	0	0	0	0	0	0	1	0	0	0	1	1	0	0.125	0.05	0.2
Prevotella sp. oral taxon 305	0	0	1	1	0	0	0	0	0	0	0	0	0	0	0	0	0	1	0	0	0	0	0	0	0	0	0	0	0	0	0	0	0	1	0	0	0	0	0	1	0.125	0.15	0.1
Granulicatella adiacens nov 95.99%	0	0	0	0	0	0	0	0	0	0	0	0	0	0	0	0	0	0	0	0	0	0	1	0	0	0	0	0	1	1	0	0	0	1	0	0	0	0	0	1	0.125	0	0.25
Streptococcus mutans	0	0	1	0	0	0	1	0	0	0	0	0	0	0	0	0	0	0	0	0	0	0	0	0	0	0	0	0	0	0	0	1	0	1	0	0	0	1	0	0	0.125	0.1	0.15
Streptococcus peroris	0	0	0	0	0	0	0	0	0	0	0	0	0	0	0	0	0	0	0	0	0	0	0	0	0	0	0	0	1	1	0	0	0	1	0	1	0	1	0	0	0.125	0	0.25
Streptococcus pneumoniae	0	0	0	0	1	0	0	0	0	0	0	0	0	0	0	0	1	0	0	0	0	1	0	0	1	0	0	1	0	0	0	0	0	0	0	0	0	0	0	0	0.125	0.1	0.15
Catonella sp. oral taxon 164	1	0	0	0	1	0	0	0	0	0	0	0	0	0	0	0	0	1	0	0	0	0	0	0	0	0	0	0	0	0	0	0	1	0	1	0	0	0	0	0	0.125	0.15	0.1
Lachnospiraceae [G-2] sp. oral taxon 096	0	0	1	0	0	0	0	0	0	0	0	0	0	0	0	0	0	1	0	0	0	0	0	0	0	0	0	0	0	1	0	0	0	1	0	1	0	0	0	0	0.125	0.1	0.15
Peptococcus sp. oral taxon 167	1	0	0	0	1	0	0	0	0	0	1	0	0	0	1	0	0	1	0	0	0	0	0	0	0	0	0	0	0	0	0	0	0	0	0	0	0	0	0	0	0.125	0.25	0
Parvimonas sp. oral taxon 110	1	0	0	0	0	0	1	0	1	0	0	0	0	0	0	0	0	1	0	0	0	0	0	0	0	0	0	0	0	0	0	0	0	0	1	0	0	0	0	0	0.125	0.2	0.05
Peptostreptococcaceae [XI][G-4] multispecies spp34 2	1	1	0	0	0	0	0	0	0	0	0	0	0	0	1	0	1	1	0	0	0	0	0	0	0	0	0	0	0	0	0	0	0	0	0	0	0	0	0	0	0.125	0.25	0
Peptostreptococcaceae [XI][G-6] [Eubacterium] nodatum	0	1	0	0	0	0	0	0	0	0	0	0	0	0	0	0	0	1	0	0	0	0	0	0	0	0	0	0	0	0	0	0	0	1	1	0	0	0	1	0	0.125	0.1	0.15
Dialister invisus	0	0	0	0	0	0	0	1	1	0	0	0	0	0	0	0	1	1	0	0	0	0	0	0	0	0	0	0	0	0	0	0	0	0	1	0	0	0	0	0	0.125	0.2	0.05
Fusobacterium multispecies spp25 2	0	0	0	0	0	0	0	0	0	0	1	0	0	0	0	0	1	0	1	0	0	0	0	1	0	0	0	0	0	0	0	0	0	0	1	0	0	0	0	0	0.125	0.15	0.1
Fusobacterium sp. oral taxon 370	0	0	0	0	1	0	1	0	0	0	0	0	0	0	1	0	0	1	0	0	0	0	0	0	0	0	0	0	0	0	0	0	0	0	0	1	0	0	0	0	0.125	0.2	0.05
Leptotrichia sp. oral taxon 215 nov 97.62%	0	0	0	0	0	0	0	0	1	0	1	0	0	0	0	0	0	0	0	0	0	0	0	0	0	0	0	0	0	0	0	0	1	0	0	0	1	0	0	1	0.125	0.1	0.15
Leptotrichia sp. oral taxon 217	0	0	0	0	0	0	0	0	0	0	1	0	0	0	0	1	0	0	0	0	0	0	0	0	1	1	0	0	0	0	0	0	1	0	0	0	0	0	0	0	0.125	0.1	0.15
Leptotrichia sp. oral taxon 219 nov 88.65%	0	0	0	0	0	0	0	0	0	0	0	1	0	0	0	0	0	0	0	0	0	0	0	0	0	0	0	0	0	0	0	0	0	1	0	1	0	1	0	1	0.125	0.05	0.2
Afipia sp. genosp. 4	0	0	0	0	0	0	0	1	1	0	0	0	1	0	0	1	0	0	0	0	0	0	0	0	0	0	0	0	0	0	0	1	0	0	0	0	0	0	0	0	0.125	0.2	0.05
Haemophilus parainfluenzae nov 97.15%	0	0	1	0	0	0	0	0	0	0	0	1	0	0	0	0	0	1	0	0	0	0	0	0	1	0	0	0	0	0	0	0	0	0	0	0	1	0	0	0	0.125	0.15	0.1
Haemophilus pittmaniae	0	0	0	0	0	0	1	0	1	0	0	1	0	0	0	0	0	0	0	0	0	0	0	0	0	0	1	0	0	0	0	0	0	0	0	0	1	0	0	0	0.125	0.15	0.1
Acinetobacter sp. Oral Taxon A58	1	0	0	0	0	1	1	0	0	0	0	1	0	0	0	0	0	0	0	0	0	0	0	0	0	0	0	0	0	0	0	0	0	0	0	0	1	0	0	0	0.125	0.2	0.05
Moraxella osloensis nov 89.07%	1	0	0	0	0	0	0	0	1	0	1	1	0	0	0	0	0	1	0	0	0	0	0	0	0	0	0	0	0	0	0	0	0	0	0	0	0	0	0	0	0.125	0.25	0
Treponema sp. oral taxon 234	0	0	0	0	0	0	0	0	0	0	1	1	0	0	0	0	0	0	0	1	0	0	0	0	0	0	0	0	0	0	0	0	0	0	1	0	0	0	1	0	0.125	0.15	0.1
Treponema sp. oral taxon 238	0	0	0	0	1	0	0	0	0	0	1	1	0	0	0	0	0	1	0	0	0	0	0	0	0	0	0	0	0	0	0	0	0	0	1	0	0	0	0	0	0.125	0.2	0.05
Treponema sp. oral taxon 951	0	0	0	0	0	0	0	0	1	0	0	0	0	0	0	0	0	1	0	0	0	0	0	0	0	0	0	0	0	0	0	0	0	0	1	0	0	1	1	0	0.125	0.1	0.15
Pyramidobacter piscolens	0	1	0	1	0	0	0	0	0	0	0	0	0	0	0	0	0	1	0	0	0	0	0	0	0	0	0	1	0	0	0	0	0	1	0	0	0	0	0	0	0.125	0.15	0.1
Actinomyces naeslundii	0	0	0	0	0	0	0	0	1	0	0	0	1	0	0	0	0	0	0	0	0	0	0	0	0	0	0	0	0	0	0	0	1	0	0	0	0	0	1	0	0.1	0.1	0.1
Actinomyces oris	0	0	0	0	0	0	0	0	0	0	0	1	0	0	0	0	0	0	0	0	0	0	0	0	0	1	0	0	0	1	0	0	0	0	1	0	0	0	0	0	0.1	0.05	0.15
Kocuria sp. Oral Taxon B56	0	0	0	0	0	1	1	0	0	0	0	0	0	0	0	0	0	0	0	1	0	0	0	0	0	0	0	1	0	0	0	0	0	0	0	0	0	0	0	0	0.1	0.15	0.05
Rothia mucilaginosa nov 89.14%	0	0	0	0	0	0	0	0	0	0	0	0	0	0	0	0	0	0	0	0	0	0	1	1	0	0	1	0	0	0	0	0	0	1	0	0	0	0	0	0	0.1	0	0.2
Propionibacterium granulosum	0	0	0	0	0	0	0	0	0	0	0	1	0	0	0	1	0	0	0	0	0	0	0	0	0	0	0	0	0	0	0	1	0	0	1	0	0	0	0	0	0.1	0.1	0.1
Olsenella sp. oral taxon 807	0	0	1	0	0	0	0	0	1	0	0	0	1	0	0	0	0	0	0	0	0	0	0	0	0	1	0	0	0	0	0	0	0	0	0	0	0	0	0	0	0.1	0.15	0.05
Olsenella uli	0	0	1	0	0	0	0	0	0	1	0	0	0	0	0	0	0	1	0	0	0	0	0	0	0	0	0	0	0	0	0	0	0	0	1	0	0	0	0	0	0.1	0.15	0.05
Bacteroidaceae [G-1] sp. oral taxon 272	0	0	0	0	0	0	0	0	1	0	0	0	0	0	0	0	0	1	0	0	0	0	0	0	0	0	0	0	0	0	0	0	0	0	1	0	0	1	0	0	0.1	0.1	0.1
Porphyromonas catoniae nov 97.76%	0	0	0	0	0	1	0	0	0	0	0	0	0	0	0	0	0	0	1	0	0	0	0	0	1	0	0	0	0	1	0	0	0	0	0	0	0	0	0	0	0.1	0.1	0.1
Porphyromonas sp. oral taxon 284	0	0	0	0	0	0	1	1	1	0	0	0	0	0	0	0	0	0	0	0	0	0	0	0	0	0	0	0	0	0	0	0	1	0	0	0	0	0	0	0	0.1	0.15	0.05
Porphyromonas sp. oral taxon 284 nov 97.76%	1	0	0	0	0	0	0	0	1	0	0	0	1	0	0	0	0	0	0	0	0	0	0	0	1	0	0	0	0	0	0	0	0	0	0	0	0	0	0	0	0.1	0.15	0.05
Porphyromonas uenonis	0	0	0	0	0	0	0	0	0	0	1	1	0	1	0	0	0	1	0	0	0	0	0	0	0	0	0	0	0	0	0	0	0	0	0	0	0	0	0	0	0.1	0.2	0
Prevotella bivia	0	0	0	0	0	0	0	0	0	0	0	0	0	1	0	0	1	1	0	0	0	0	0	0	0	0	0	0	0	0	0	0	0	0	0	0	0	1	0	0	0.1	0.15	0.05
Prevotella loescheii	0	0	0	0	0	0	0	0	1	0	1	0	0	0	0	0	0	0	0	0	0	0	0	0	0	1	0	0	0	0	0	0	1	0	0	0	0	0	0	0	0.1	0.1	0.1
Prevotella marshii	0	0	0	0	0	0	1	0	0	0	0	0	0	0	0	0	0	0	0	0	0	0	0	0	0	0	0	0	0	0	0	0	0	0	1	1	0	0	1	0	0.1	0.05	0.15
Bergeyella sp. oral taxon 900 nov 90.91%	0	0	0	0	0	0	0	0	1	0	0	0	1	0	1	0	0	0	0	0	0	0	0	0	0	0	0	0	0	1	0	0	0	0	0	0	0	0	0	0	0.1	0.15	0.05
Capnocytophaga multispecies spp1 2	0	0	0	0	0	0	0	1	0	0	0	0	0	0	0	0	0	0	0	0	0	0	0	0	0	1	0	0	0	0	0	0	1	0	0	0	1	0	0	0	0.1	0.05	0.15
Capnocytophaga sp. oral taxon 338	0	0	0	0	0	0	0	0	0	0	0	0	0	0	0	0	0	0	1	0	0	0	0	0	0	1	0	0	0	0	0	0	0	0	1	1	0	0	0	0	0.1	0.05	0.15
Anaerolineae [G-1] sp. oral taxon 439	0	0	1	0	0	0	0	0	1	0	0	0	0	0	0	0	0	0	0	0	0	0	0	0	0	0	0	0	0	0	0	0	0	0	1	0	0	1	0	0	0.1	0.1	0.1
Meiothermus timidus	0	0	1	0	0	1	0	0	1	0	0	0	0	1	0	0	0	0	0	0	0	0	0	0	0	0	0	0	0	0	0	0	0	0	0	0	0	0	0	0	0.1	0.2	0
Gemella haemolysans nov 96.22%	0	0	0	0	0	0	0	0	0	0	0	0	0	0	0	0	0	0	0	1	1	1	0	0	0	0	0	0	0	1	0	0	0	0	0	0	0	0	0	0	0.1	0.05	0.15
Staphylococcus aureus	0	0	0	1	0	0	0	0	0	0	0	0	0	1	0	1	1	0	0	0	0	0	0	0	0	0	0	0	0	0	0	0	0	0	0	0	0	0	0	0	0.1	0.2	0
Clostridiales [G] sp. Oral Taxon G74	0	0	1	0	1	0	0	0	0	0	0	0	0	0	0	0	0	1	0	0	0	0	0	0	0	0	0	0	0	0	0	0	0	0	1	0	0	0	0	0	0.1	0.15	0.05
Lachnospiraceae [G-8] sp. oral taxon 500 nov 97.90%	0	1	0	0	0	0	0	0	0	0	0	0	0	0	1	0	0	0	0	0	0	0	0	0	0	0	0	0	0	0	0	0	0	1	1	0	0	0	0	0	0.1	0.1	0.1
Peptococcus sp. oral taxon 168	0	0	0	0	0	0	0	0	0	0	1	0	0	0	1	0	0	1	0	0	0	0	0	0	0	0	0	0	0	0	0	0	0	0	0	0	1	0	0	0	0.1	0.15	0.05
Parvimonas sp. oral taxon 393	0	0	0	0	1	0	0	0	1	0	0	0	0	0	0	0	0	1	0	0	0	0	0	0	0	0	0	0	0	0	0	0	0	0	1	0	0	0	0	0	0.1	0.15	0.05
Peptoniphilus indolicus	0	1	0	0	0	0	0	0	0	0	1	0	0	0	0	0	1	1	0	0	0	0	0	0	0	0	0	0	0	0	0	0	0	0	0	0	0	0	0	0	0.1	0.2	0
Peptostreptococcaceae [G] sp. Oral Taxon B61	0	1	0	0	0	0	0	0	0	0	1	1	0	0	0	0	0	1	0	0	0	0	0	0	0	0	0	0	0	0	0	0	0	0	0	0	0	0	0	0	0.1	0.2	0
Selenomonas artemidis	0	0	0	0	0	0	0	0	0	0	0	0	0	0	0	0	0	0	0	0	0	0	0	0	0	1	0	1	0	0	0	0	1	0	1	0	0	0	0	0	0.1	0	0.2
Selenomonas sp. oral taxon 137	0	0	0	1	1	0	0	0	0	0	0	0	0	0	0	0	0	0	0	0	0	0	0	0	0	0	0	0	0	0	0	0	1	0	1	0	0	0	0	0	0.1	0.1	0.1
Selenomonas sp. oral taxon 892	0	0	0	0	0	0	0	0	1	0	1	0	0	0	0	0	0	0	0	0	0	0	0	0	0	0	0	0	0	0	0	0	1	0	1	0	0	0	0	0	0.1	0.1	0.1
Leptotrichia sp. oral taxon 417 nov 97.84%	0	0	1	0	0	0	0	0	0	0	1	0	0	0	0	0	0	0	0	0	0	0	0	0	0	0	0	0	0	0	0	0	1	0	0	0	0	1	0	0	0.1	0.1	0.1
Leptotrichia sp. oral taxon 909	0	0	0	0	0	0	0	0	0	0	0	0	0	0	1	0	0	0	0	0	0	0	0	0	1	1	0	0	0	0	0	0	0	0	0	0	0	0	1	0	0.1	0.05	0.15
Methylobacterium rhodesianum	1	1	0	1	0	0	0	1	0	0	0	0	0	0	0	0	0	0	0	0	0	0	0	0	0	0	0	0	0	0	0	0	0	0	0	0	0	0	0	0	0.1	0.2	0
Bradyrhizobium sp. str. LMG10689	0	0	0	0	0	0	0	1	0	0	0	0	1	0	0	0	0	0	0	0	0	0	0	0	0	0	1	0	0	0	0	1	0	0	0	0	0	0	0	0	0.1	0.1	0.1
Ralstonia sp. oral taxon 406	0	1	0	0	0	0	0	1	0	0	0	0	1	0	0	0	0	0	0	0	0	0	0	0	0	0	0	1	0	0	0	0	0	0	0	0	0	0	0	0	0.1	0.15	0.05
Diaphorobacter nitroreducens Oral Taxon A07	0	0	0	0	0	0	0	0	0	0	0	0	0	0	0	0	0	0	0	0	0	0	0	0	0	0	0	1	0	1	0	1	0	0	0	0	0	0	1	0	0.1	0	0.2
Neisseria sp. oral taxon 018	0	0	0	0	0	0	0	1	1	0	0	0	1	0	1	0	0	0	0	0	0	0	0	0	0	0	0	0	0	0	0	0	0	0	0	0	0	0	0	0	0.1	0.2	0
Propionivibrio sp. Oral Taxon C33	0	0	0	0	0	0	0	0	1	0	1	0	0	0	0	0	0	0	0	0	0	0	0	0	0	1	0	0	0	0	0	0	1	0	0	0	0	0	0	0	0.1	0.1	0.1
Klebsiella pneumoniae	0	0	1	0	0	0	0	0	0	0	0	0	0	1	0	0	0	0	0	0	1	0	0	0	0	0	0	0	0	0	0	0	0	0	0	0	0	0	1	0	0.1	0.1	0.1
Aggregatibacter multispecies spp29 2	0	0	0	0	0	1	0	0	1	0	0	0	1	0	0	0	0	0	0	0	0	1	0	0	0	0	0	0	0	0	0	0	0	0	0	0	0	0	0	0	0.1	0.15	0.05
Haemophilus paraphrohaemolyticus	0	0	0	1	0	0	0	0	0	0	1	0	0	0	0	0	0	0	0	0	0	0	0	0	0	0	0	0	0	0	0	0	0	0	0	1	1	0	0	0	0.1	0.1	0.1
Moraxella osloensis	0	0	0	0	0	0	0	0	0	0	0	0	0	0	0	0	0	1	0	0	0	0	0	0	0	0	0	1	0	0	0	1	0	0	0	0	1	0	0	0	0.1	0.05	0.15
Pseudomonas otitidis	0	0	0	0	0	0	0	0	0	0	0	0	0	0	0	1	1	0	0	0	0	0	0	0	0	0	0	1	0	0	0	1	0	0	0	0	0	0	0	0	0.1	0.1	0.1
Stenotrophomonas sp. Oral Taxon A24	1	0	0	0	0	0	0	0	0	0	0	0	0	0	0	0	0	0	0	0	0	0	0	0	0	0	0	0	0	0	0	1	0	0	0	0	1	0	1	0	0.1	0.05	0.15
TM7 [G-6] sp. oral taxon 870 nov 96.82%	0	0	0	0	1	0	0	0	0	0	0	0	0	0	0	0	0	0	0	0	1	0	0	0	0	0	0	1	1	0	0	0	0	0	0	0	0	0	0	0	0.1	0.05	0.15
Treponema sp. oral taxon 234 nov 87.05%	0	0	0	0	0	0	0	0	0	0	1	1	0	0	0	0	0	1	0	0	0	0	0	0	0	0	0	0	0	0	0	0	0	0	0	0	1	0	0	0	0.1	0.15	0.05
Treponema sp. oral taxon 270	0	0	1	0	0	0	0	0	1	0	0	0	0	0	0	0	0	1	0	0	0	0	0	0	0	0	0	0	0	0	0	0	0	0	1	0	0	0	0	0	0.1	0.15	0.05
Fretibacterium sp. oral taxon 359	0	0	0	0	1	0	1	0	0	0	1	0	0	0	0	0	0	0	0	0	0	0	0	0	0	0	0	0	0	0	0	0	0	0	1	0	0	0	0	0	0.1	0.15	0.05
Fretibacterium sp. oral taxon 362	0	0	1	0	1	0	0	0	0	0	0	1	0	0	0	0	0	0	0	0	0	0	0	0	0	0	0	0	0	0	0	0	0	0	1	0	0	0	0	0	0.1	0.15	0.05
Actinomyces sp. oral taxon 175 nov 97.96%	0	0	0	0	0	0	0	0	0	0	0	0	0	0	0	0	0	0	0	0	0	0	0	0	0	0	0	0	0	0	0	1	1	0	1	0	0	0	0	0	0.075	0	0.15
Actinomyces sp. oral taxon 178	0	0	0	0	0	0	0	0	0	0	0	0	0	0	0	0	0	0	0	0	0	0	0	0	0	1	0	0	0	0	0	0	1	0	0	0	0	1	0	0	0.075	0	0.15
Actinomycetales [G] sp. Oral Taxon C05	0	0	0	0	0	0	0	0	0	0	0	0	0	0	0	0	0	0	0	0	0	1	0	0	0	0	0	0	0	0	0	1	0	0	0	0	1	0	0	0	0.075	0	0.15
Corynebacterium accolens	0	0	0	1	0	0	0	0	0	0	0	0	0	0	0	0	0	0	0	0	0	0	0	0	0	0	0	0	1	0	0	1	0	0	0	0	0	0	0	0	0.075	0.05	0.1
Dietzia cinnamea nov 93.21%	0	1	0	0	0	0	0	0	0	0	0	0	0	1	0	0	0	1	0	0	0	0	0	0	0	0	0	0	0	0	0	0	0	0	0	0	0	0	0	0	0.075	0.15	0
Rothia mucilaginosa nov 97.67%	0	0	0	0	0	0	0	0	0	0	0	0	0	0	0	0	0	0	0	1	0	0	0	0	0	0	0	0	0	0	0	0	0	0	0	1	0	1	0	0	0.075	0.05	0.1
Bifidobacterium dentium	0	0	0	0	0	0	0	0	0	0	0	0	0	0	0	0	0	0	0	0	0	0	0	0	0	0	1	1	0	0	0	0	0	0	1	0	0	0	0	0	0.075	0	0.15
Bifidobacterium longum	0	0	0	0	0	0	0	0	0	0	0	0	1	0	0	0	1	1	0	0	0	0	0	0	0	0	0	0	0	0	0	0	0	0	0	0	0	0	0	0	0.075	0.15	0
Janibacter indicus	1	0	1	0	0	1	0	0	0	0	0	0	0	0	0	0	0	0	0	0	0	0	0	0	0	0	0	0	0	0	0	0	0	0	0	0	0	0	0	0	0.075	0.15	0
Kocuria sediminis	0	0	0	1	0	0	0	0	0	0	0	0	0	0	0	0	0	1	0	0	0	0	0	0	0	0	0	0	0	0	0	1	0	0	0	0	0	0	0	0	0.075	0.1	0.05
Bacteroidetes [G-5] sp. oral taxon 505	0	0	0	0	0	0	0	0	0	0	0	0	0	0	1	0	0	0	0	0	0	0	0	0	0	0	0	0	0	0	0	0	0	0	1	0	0	0	1	0	0.075	0.05	0.1
Bacteroides fragilis	0	0	0	0	1	0	0	0	0	0	1	1	0	0	0	0	0	0	0	0	0	0	0	0	0	0	0	0	0	0	0	0	0	0	0	0	0	0	0	0	0.075	0.15	0
Porphyromonas multispecies sppn1 2 nov 97.76%	0	0	0	0	0	0	0	0	0	0	0	0	0	0	1	0	0	0	0	0	0	0	0	0	0	0	0	0	0	0	0	0	1	0	0	1	0	0	0	0	0.075	0.05	0.1
Prevotella aurantiaca	0	0	0	0	0	0	0	0	0	0	0	0	0	0	0	0	0	0	0	0	0	0	0	0	0	0	0	0	0	0	1	0	0	0	0	1	1	0	0	0	0.075	0	0.15
Prevotella melaninogenica nov 96.55%	0	0	0	0	0	0	0	0	0	0	0	0	0	0	0	0	0	0	0	0	0	0	0	0	0	0	0	0	1	0	0	0	0	0	0	1	0	0	0	1	0.075	0	0.15
Prevotella oralis	0	0	0	0	0	0	0	1	0	0	0	0	0	0	0	0	0	0	0	0	0	0	0	0	0	0	0	0	0	0	0	0	0	1	0	0	0	0	0	1	0.075	0.05	0.1
Prevotella oulorum nov 89.60%	0	0	0	0	0	0	0	0	0	0	0	0	1	0	0	0	0	1	0	0	0	0	0	0	0	0	0	0	0	0	0	0	0	0	0	0	0	0	1	0	0.075	0.1	0.05
Capnocytophaga sp. oral taxon 901	1	0	0	0	0	0	0	0	1	0	1	0	0	0	0	0	0	0	0	0	0	0	0	0	0	0	0	0	0	0	0	0	0	0	0	0	0	0	0	0	0.075	0.15	0
Staphylococcus caprae	0	0	1	1	0	0	0	0	0	0	0	0	0	0	0	0	0	0	0	0	0	1	0	0	0	0	0	0	0	0	0	0	0	0	0	0	0	0	0	0	0.075	0.1	0.05
Enterococcus avium	0	0	0	0	0	0	0	0	0	0	0	0	0	1	0	1	1	0	0	0	0	0	0	0	0	0	0	0	0	0	0	0	0	0	0	0	0	0	0	0	0.075	0.15	0
Lactobacillus salivarius	0	0	0	0	0	1	1	0	0	0	0	0	0	0	0	1	0	0	0	0	0	0	0	0	0	0	0	0	0	0	0	0	0	0	0	0	0	0	0	0	0.075	0.15	0
Streptococcus intermedius	0	0	0	0	0	0	0	0	0	0	0	1	0	0	0	0	0	0	0	0	0	0	0	0	0	0	0	0	0	1	0	0	0	0	0	0	0	1	0	0	0.075	0.05	0.1
Streptococcus sp. Oral Taxon B66	0	0	0	0	0	0	0	0	0	0	0	0	0	0	0	0	0	0	0	0	0	0	0	0	0	0	0	0	0	1	0	0	0	0	0	1	0	1	0	0	0.075	0	0.15
Streptococcus sp. oral taxon 064 nov 97.98%	0	0	0	0	0	0	1	0	0	0	0	0	0	0	0	0	0	0	0	0	0	0	0	0	0	0	0	0	0	1	0	0	0	0	0	1	0	0	0	0	0.075	0.05	0.1
Butyrivibrio sp. oral taxon 080	0	0	0	0	1	0	0	0	0	0	0	0	0	0	1	0	0	1	0	0	0	0	0	0	0	0	0	0	0	0	0	0	0	0	0	0	0	0	0	0	0.075	0.15	0
Lachnospiraceae [G] sp. Oral Taxon G33	0	0	0	0	1	0	0	0	0	0	0	0	0	0	0	0	0	0	0	0	0	0	0	0	0	0	0	1	0	0	0	0	0	0	1	0	0	0	0	0	0.075	0.05	0.1
Anaerococcus lactolyticus nov 91.06%	0	0	0	0	0	0	0	0	0	0	0	1	0	0	0	0	0	0	0	0	0	0	0	0	0	0	0	0	0	0	0	1	0	0	0	0	1	0	0	0	0.075	0.05	0.1
Peptostreptococcaceae [XI][G-7] [Eubacterium] yurii subsps. yurii & margaretiae nov 90.91%	0	0	0	0	0	0	0	0	0	0	1	1	1	0	0	0	0	0	0	0	0	0	0	0	0	0	0	0	0	0	0	0	0	0	0	0	0	0	0	0	0.075	0.15	0
Peptostreptococcaceae [XI][G-7] sp. oral taxon 922	0	0	0	0	0	0	0	0	0	0	1	1	0	0	0	0	0	0	0	0	0	0	0	0	0	0	0	0	0	0	0	0	0	0	0	0	1	0	0	0	0.075	0.1	0.05
Bulleidia extructa	1	1	0	0	1	0	0	0	0	0	0	0	0	0	0	0	0	0	0	0	0	0	0	0	0	0	0	0	0	0	0	0	0	0	0	0	0	0	0	0	0.075	0.15	0
Eggerthia catenaformis	0	1	0	0	0	0	0	0	0	0	0	0	0	0	0	0	0	1	0	0	0	0	0	0	0	0	0	0	0	0	0	0	0	0	1	0	0	0	0	0	0.075	0.1	0.05
Selenomonas sp. oral taxon 134	0	1	0	0	0	0	0	0	0	0	1	1	0	0	0	0	0	0	0	0	0	0	0	0	0	0	0	0	0	0	0	0	0	0	0	0	0	0	0	0	0.075	0.15	0
Selenomonas sp. oral taxon 136	0	0	0	0	0	0	1	0	0	0	0	0	0	0	0	0	0	0	1	0	0	0	0	0	0	0	0	0	0	0	0	0	1	0	0	0	0	0	0	0	0.075	0.1	0.05
Selenomonas sp. oral taxon 442	0	0	0	0	1	0	0	0	0	0	0	0	0	0	0	0	0	1	0	0	0	0	0	0	0	0	0	0	0	0	0	0	0	0	1	0	0	0	0	0	0.075	0.1	0.05
Fusobacterium gonidiaformans	0	0	0	0	0	0	0	0	0	0	0	0	0	0	0	0	0	1	1	1	0	0	0	0	0	0	0	0	0	0	0	0	0	0	0	0	0	0	0	0	0.075	0.15	0
Fusobacterium multispecies spp9 2	1	0	0	1	0	0	0	0	1	0	0	0	0	0	0	0	0	0	0	0	0	0	0	0	0	0	0	0	0	0	0	0	0	0	0	0	0	0	0	0	0.075	0.15	0
Leptotrichia sp. oral taxon 221 nov 90.45%	1	0	1	0	1	0	0	0	0	0	0	0	0	0	0	0	0	0	0	0	0	0	0	0	0	0	0	0	0	0	0	0	0	0	0	0	0	0	0	0	0.075	0.15	0
GN02 [G-1] sp. oral taxon 872	0	0	0	0	0	0	0	0	0	0	0	0	0	0	0	0	0	0	0	0	0	0	0	0	0	1	0	0	0	0	0	0	1	0	0	0	0	0	1	0	0.075	0	0.15
Alphaproteobacteria [G] sp. Oral Taxon A28 nov 84.07%	0	0	0	0	1	0	0	0	1	0	0	0	0	0	0	0	0	1	0	0	0	0	0	0	0	0	0	0	0	0	0	0	0	0	0	0	0	0	0	0	0.075	0.15	0
Alphaproteobacteria [G] sp. Oral Taxon C96	0	1	0	0	0	0	0	0	1	0	0	1	0	0	0	0	0	0	0	0	0	0	0	0	0	0	0	0	0	0	0	0	0	0	0	0	0	0	0	0	0.075	0.15	0
Afipia broomeae	0	0	0	0	0	0	0	1	0	0	0	1	1	0	0	0	0	0	0	0	0	0	0	0	0	0	0	0	0	0	0	0	0	0	0	0	0	0	0	0	0.075	0.15	0
Betaproteobacteria [G] sp. Oral Taxon B96	0	0	0	0	0	0	0	0	0	0	0	0	0	0	0	0	0	0	0	0	1	0	0	0	0	0	0	0	0	0	0	1	0	0	0	0	0	0	1	0	0.075	0	0.15
Achromobacter xylosoxidans	0	0	0	0	0	0	0	0	1	0	0	0	0	1	0	0	0	1	0	0	0	0	0	0	0	0	0	0	0	0	0	0	0	0	0	0	0	0	0	0	0.075	0.15	0
Alcaligenes sp. str. CO14	1	0	0	0	0	1	1	0	0	0	0	0	0	0	0	0	0	0	0	0	0	0	0	0	0	0	0	0	0	0	0	0	0	0	0	0	0	0	0	0	0.075	0.15	0
Delftia sp. Oral Taxon A59	0	1	0	1	0	0	0	1	0	0	0	0	0	0	0	0	0	0	0	0	0	0	0	0	0	0	0	0	0	0	0	0	0	0	0	0	0	0	0	0	0.075	0.15	0
Ottowia sp. oral taxon 894 nov 97.31%	1	0	0	0	0	0	0	1	1	0	0	0	0	0	0	0	0	0	0	0	0	0	0	0	0	0	0	0	0	0	0	0	0	0	0	0	0	0	0	0	0.075	0.15	0
Cupriavidus metallidurans	0	1	0	0	0	0	0	1	0	0	0	0	0	1	0	0	0	0	0	0	0	0	0	0	0	0	0	0	0	0	0	0	0	0	0	0	0	0	0	0	0.075	0.15	0
Massilia timonae	0	0	0	0	0	0	0	0	0	0	0	0	0	0	0	0	1	1	0	1	0	0	0	0	0	0	0	0	0	0	0	0	0	0	0	0	0	0	0	0	0.075	0.15	0
Neisseria sp. oral taxon 018 nov 97.96%	0	0	0	0	0	0	0	1	0	0	0	0	1	0	1	0	0	0	0	0	0	0	0	0	0	0	0	0	0	0	0	0	0	0	0	0	0	0	0	0	0.075	0.15	0
Campylobacter sp. Oral Taxon G43	0	0	0	0	0	0	0	0	0	0	0	0	0	0	0	0	0	0	0	0	0	0	0	0	0	0	1	0	0	0	0	0	0	0	1	0	0	1	0	0	0.075	0	0.15
Cardiobacterium hominis nov 97.73%	0	0	0	0	0	0	0	1	0	0	0	0	0	0	0	0	0	0	0	0	0	0	0	0	1	1	0	0	0	0	0	0	0	0	0	0	0	0	0	0	0.075	0.05	0.1
Cardiobacterium valvarum nov 95.28%	0	0	0	0	0	0	1	0	0	0	1	0	0	0	0	0	0	0	0	0	0	0	0	0	0	1	0	0	0	0	0	0	0	0	0	0	0	0	0	0	0.075	0.1	0.05
Citrobacter koseri	0	0	0	0	0	0	0	0	0	1	0	0	0	1	0	1	0	0	0	0	0	0	0	0	0	0	0	0	0	0	0	0	0	0	0	0	0	0	0	0	0.075	0.15	0
Escherichia coli	0	0	0	0	0	0	0	1	0	0	0	1	0	0	0	1	0	0	0	0	0	0	0	0	0	0	0	0	0	0	0	0	0	0	0	0	0	0	0	0	0.075	0.15	0
Aggregatibacter actinomycetemcomitans	1	0	0	0	0	0	0	0	0	0	0	1	0	0	0	0	0	0	0	0	0	0	0	0	0	0	0	0	0	0	0	0	1	0	0	0	0	0	0	0	0.075	0.1	0.05
Aggregatibacter paraphrophilus	0	0	0	0	0	1	0	0	0	0	0	0	1	0	0	0	0	0	1	0	0	0	0	0	0	0	0	0	0	0	0	0	0	0	0	0	0	0	0	0	0.075	0.15	0
Aggregatibacter sp. oral taxon 898	0	0	0	0	0	0	0	0	0	0	0	0	0	0	1	0	0	0	0	0	0	0	0	0	0	1	0	0	0	0	0	0	1	0	0	0	0	0	0	0	0.075	0.05	0.1
Acinetobacter baumannii nov 96.09%	1	0	0	0	0	1	0	0	0	0	0	1	0	0	0	0	0	0	0	0	0	0	0	0	0	0	0	0	0	0	0	0	0	0	0	0	0	0	0	0	0.075	0.15	0
Acinetobacter sp. str. DR1	0	0	0	0	0	0	0	0	0	0	0	0	0	0	1	0	0	0	0	0	1	0	0	0	0	0	0	0	0	0	0	1	0	0	0	0	0	0	0	0	0.075	0.05	0.1
Moraxella lacunata	0	0	0	0	0	0	0	0	0	0	1	1	0	0	0	0	0	1	0	0	0	0	0	0	0	0	0	0	0	0	0	0	0	0	0	0	0	0	0	0	0.075	0.15	0
TM7 [G-1] sp. oral taxon 348	0	0	0	0	0	0	0	0	1	0	0	0	0	0	0	0	0	0	0	0	0	0	0	0	0	1	0	0	0	0	0	0	1	0	0	0	0	0	0	0	0.075	0.05	0.1
TM7 [G-1] sp. oral taxon 349 nov 97.79%	0	0	0	0	0	0	0	0	0	0	0	0	0	0	0	0	0	0	0	0	0	0	0	0	0	0	0	0	0	0	0	0	1	1	1	0	0	0	0	0	0.075	0	0.15
Treponema sp. Oral Taxon G85	0	0	0	0	1	0	1	0	0	0	0	0	0	0	0	0	0	0	0	0	0	0	0	0	0	0	0	1	0	0	0	0	0	0	0	0	0	0	0	0	0.075	0.1	0.05
Treponema parvum	0	0	0	0	1	0	0	0	0	0	0	0	0	0	0	0	0	0	0	0	0	0	0	0	0	0	0	0	0	0	0	0	0	1	1	0	0	0	0	0	0.075	0.05	0.1
Treponema sp. oral taxon 236	0	0	0	0	0	0	0	0	1	0	0	0	0	0	1	0	0	1	0	0	0	0	0	0	0	0	0	0	0	0	0	0	0	0	0	0	0	0	0	0	0.075	0.15	0
Treponema sp. oral taxon 249	0	0	0	0	0	0	0	0	0	0	0	0	0	0	1	0	0	1	0	0	0	0	0	0	0	0	0	0	0	0	0	0	0	0	1	0	0	0	0	0	0.075	0.1	0.05
Treponema sp. oral taxon 268	0	0	0	0	0	0	0	0	0	0	1	0	0	0	0	0	1	0	0	0	0	0	0	0	0	1	0	0	0	0	0	0	0	0	0	0	0	0	0	0	0.075	0.1	0.05
Fretibacterium sp. oral taxon 361	0	0	0	0	0	0	0	0	1	0	0	0	0	0	0	0	0	0	0	0	0	0	0	0	0	0	0	0	0	0	0	0	0	0	1	0	0	0	1	0	0.075	0.05	0.1
Actinomyces cardiffensis	0	0	0	0	0	0	0	0	0	0	0	0	0	0	0	0	0	0	0	0	0	0	0	0	0	0	0	0	0	0	0	0	0	1	1	0	0	0	0	0	0.05	0	0.1
Actinomyces dentalis	0	0	0	0	0	0	0	0	0	0	1	0	0	0	0	0	0	0	0	0	0	0	0	0	0	0	0	0	0	0	0	0	0	0	0	1	0	0	0	0	0.05	0.05	0.05
Actinomyces johnsonii	0	0	0	0	0	0	0	0	0	0	0	0	0	0	0	0	0	0	0	0	0	0	0	0	0	1	0	0	0	0	0	0	1	0	0	0	0	0	0	0	0.05	0	0.1
Actinomyces lingnae [NVP] nov 94.85%	0	1	0	0	0	0	0	0	0	0	0	0	0	0	0	0	0	0	1	0	0	0	0	0	0	0	0	0	0	0	0	0	0	0	0	0	0	0	0	0	0.05	0.1	0
Actinomyces massiliensis	0	0	0	0	0	0	0	0	0	0	0	0	0	0	0	0	0	0	0	0	0	0	0	0	0	0	0	1	0	0	0	1	0	0	0	0	0	0	0	0	0.05	0	0.1
Actinomyces naeslundii nov 91.83%	0	0	0	0	0	0	0	0	0	0	0	1	1	0	0	0	0	0	0	0	0	0	0	0	0	0	0	0	0	0	0	0	0	0	0	0	0	0	0	0	0.05	0.1	0
Actinomyces sp. oral taxon 877	0	0	0	0	0	0	0	0	0	0	0	0	0	0	0	0	0	0	0	0	0	0	0	0	0	0	0	0	0	1	0	0	1	0	0	0	0	0	0	0	0.05	0	0.1
Arcanobacterium haemolyticum	0	0	0	0	0	0	0	0	0	0	1	1	0	0	0	0	0	0	0	0	0	0	0	0	0	0	0	0	0	0	0	0	0	0	0	0	0	0	0	0	0.05	0.1	0
Corynebacterium sp. Oral Taxon A16	0	0	0	0	0	0	0	0	0	0	0	0	0	0	0	0	0	0	0	0	0	0	0	0	0	1	0	0	0	0	0	0	0	0	0	0	0	1	0	0	0.05	0	0.1
Corynebacterium sp. Oral Taxon B71	0	0	0	0	0	0	0	0	0	0	0	0	0	0	0	0	0	0	0	0	0	1	0	0	0	0	0	0	0	0	0	0	0	0	0	0	1	0	0	0	0.05	0	0.1
Microbacterium sp. Oral Taxon C11 nov 80.64%	0	0	0	0	0	0	0	0	0	0	0	0	0	0	0	0	0	0	0	0	0	0	0	0	0	0	1	0	0	0	0	0	0	0	0	0	0	0	0	1	0.05	0	0.1
Kocuria polaris Oral Taxon A70	0	0	0	0	0	0	0	0	0	0	0	0	1	0	0	0	1	0	0	0	0	0	0	0	0	0	0	0	0	0	0	0	0	0	0	0	0	0	0	0	0.05	0.1	0
Renibacterium salmoninarum nov 87.14%	0	0	0	0	0	0	0	0	0	0	0	0	0	0	0	0	0	0	0	0	0	0	1	1	0	0	0	0	0	0	0	0	0	0	0	0	0	0	0	0	0.05	0	0.1
Rothia aeria nov 97.89%	0	0	0	0	0	0	0	0	0	0	0	0	0	0	0	0	0	0	0	0	0	1	0	0	0	0	0	0	0	0	0	0	0	0	0	0	0	0	1	0	0.05	0	0.1
Rothia mucilaginosa nov 82.88%	0	0	0	0	0	0	0	0	0	0	0	0	0	0	0	0	0	0	0	0	0	0	0	0	0	0	0	0	1	0	0	0	0	1	0	0	0	0	0	0	0.05	0	0.1
Rothia mucilaginosa nov 90.36%	0	0	0	0	0	0	0	0	0	0	0	0	0	0	0	0	0	0	0	0	0	0	0	1	0	0	0	0	1	0	0	0	0	0	0	0	0	0	0	0	0.05	0	0.1
Rothia mucilaginosa nov 97.45%	0	0	0	0	0	0	0	0	0	0	0	0	0	0	0	0	0	0	0	1	0	0	0	0	0	0	0	0	0	0	0	0	0	1	0	0	0	0	0	0	0.05	0.05	0.05
Alloscardovia omnicolens nov 92.83%	0	0	0	0	0	0	0	0	0	0	0	1	0	0	0	0	0	0	0	0	0	0	0	0	0	0	1	0	0	0	0	0	0	0	0	0	0	0	0	0	0.05	0.05	0.05
Gardnerella vaginalis	0	0	0	0	0	0	0	0	0	0	0	0	0	0	0	0	0	1	0	0	0	0	0	0	0	0	0	0	0	0	0	0	0	0	0	0	0	1	0	0	0.05	0.05	0.05
Geodermatophilus poikilotrophus	0	0	0	0	0	0	0	0	0	0	0	0	0	0	0	0	0	1	0	0	0	0	0	0	0	0	0	0	0	0	0	1	0	0	0	0	0	0	0	0	0.05	0.05	0.05
Brevibacterium ravenspurgense	0	0	0	0	0	0	0	0	0	0	0	0	0	0	1	0	0	0	0	0	0	0	0	0	0	0	0	0	0	0	0	0	0	0	1	0	0	0	0	0	0.05	0.05	0.05
Propionibacterium acidifaciens	0	0	0	0	0	0	0	0	1	0	0	0	0	0	0	0	0	0	0	0	0	0	0	0	0	0	0	0	0	0	0	0	0	0	0	0	0	0	1	0	0.05	0.05	0.05
Cryptobacterium curtum	0	0	0	0	0	1	0	0	0	0	0	0	0	0	0	0	0	0	0	0	0	0	0	0	0	0	0	0	0	0	0	0	0	1	0	0	0	0	0	0	0.05	0.05	0.05
Bacteroidetes [G-3] sp. oral taxon 280 nov 81.64%	0	0	0	0	0	0	0	0	1	0	0	0	0	0	0	0	0	1	0	0	0	0	0	0	0	0	0	0	0	0	0	0	0	0	0	0	0	0	0	0	0.05	0.1	0
Bacteroidetes [G-3] sp. oral taxon 436	0	0	0	0	0	0	0	0	1	0	0	0	0	0	0	0	0	0	0	0	0	0	0	0	0	0	0	0	0	0	0	0	0	0	1	0	0	0	0	0	0.05	0.05	0.05
Bacteroidetes [G-3] sp. oral taxon 503 nov 77.15%	0	0	0	0	0	0	0	0	0	0	0	0	0	0	0	0	0	1	0	0	0	0	0	0	0	0	0	0	0	0	0	0	0	0	1	0	0	0	0	0	0.05	0.05	0.05
Bacteroidetes [G-5] sp. oral taxon 511 nov 87.78%	0	0	0	0	0	0	0	0	0	0	1	1	0	0	0	0	0	0	0	0	0	0	0	0	0	0	0	0	0	0	0	0	0	0	0	0	0	0	0	0	0.05	0.1	0
Bacteroidetes [G-6] sp. oral taxon 516	0	1	0	0	0	0	0	0	0	0	0	0	0	0	0	0	0	1	0	0	0	0	0	0	0	0	0	0	0	0	0	0	0	0	0	0	0	0	0	0	0.05	0.1	0
Bacteroides thetaiotaomicron	0	0	0	0	0	0	0	0	1	0	0	0	0	0	0	0	0	1	0	0	0	0	0	0	0	0	0	0	0	0	0	0	0	0	0	0	0	0	0	0	0.05	0.1	0
Porphyromonas endodontalis nov 84.27%	0	0	0	0	0	0	0	0	0	0	0	0	0	0	0	0	0	0	0	0	0	1	0	0	0	0	0	0	0	0	0	0	0	0	0	0	1	0	0	0	0.05	0	0.1
Porphyromonas multispecies spp28 2	0	0	0	0	0	0	0	0	0	0	0	0	0	0	0	0	0	0	0	0	0	0	0	0	0	0	0	0	0	0	0	0	1	0	0	1	0	0	0	0	0.05	0	0.1
Tannerella forsythia nov 97.31%	0	0	0	0	0	0	0	0	1	0	1	0	0	0	0	0	0	0	0	0	0	0	0	0	0	0	0	0	0	0	0	0	0	0	0	0	0	0	0	0	0.05	0.1	0
Prevotella aurantiaca nov 85.25%	0	0	0	0	0	0	0	0	0	0	1	1	0	0	0	0	0	0	0	0	0	0	0	0	0	0	0	0	0	0	0	0	0	0	0	0	0	0	0	0	0.05	0.1	0
Prevotella denticola nov 91.09%	0	1	0	0	0	0	0	0	0	0	0	0	0	0	0	0	0	0	0	0	0	0	0	0	0	0	0	0	0	0	0	0	0	1	0	0	0	0	0	0	0.05	0.05	0.05
Prevotella disiens	0	0	0	0	0	0	0	0	0	0	0	0	0	0	0	0	0	1	0	0	0	0	0	0	0	0	0	0	0	0	0	0	0	0	0	0	0	1	0	0	0.05	0.05	0.05
Prevotella scopos	0	0	0	0	0	0	0	0	0	1	0	0	0	0	0	0	0	0	0	1	0	0	0	0	0	0	0	0	0	0	0	0	0	0	0	0	0	0	0	0	0.05	0.1	0
Prevotella sp. oral taxon 306 nov 97.96%	0	0	0	0	0	0	0	0	0	0	0	0	0	0	0	0	0	0	0	0	0	0	0	0	0	0	0	0	0	0	0	0	0	1	0	0	0	0	0	1	0.05	0	0.1
Prevotella sp. oral taxon 309	0	0	1	0	0	0	0	0	0	0	0	0	0	0	0	0	0	0	0	0	0	0	1	0	0	0	0	0	0	0	0	0	0	0	0	0	0	0	0	0	0.05	0.05	0.05
Prevotella sp. oral taxon 313 nov 97.76%	0	0	0	0	0	0	0	0	0	0	0	0	0	0	0	0	0	0	0	0	0	0	0	0	0	0	0	0	0	0	0	0	0	0	0	0	0	1	0	1	0.05	0	0.1
Prevotella timonensis	0	0	0	0	0	0	0	0	0	0	0	0	1	0	0	0	0	1	0	0	0	0	0	0	0	0	0	0	0	0	0	0	0	0	0	0	0	0	0	0	0.05	0.1	0
Bergeyella sp. oral taxon 319 nov 81.16%	0	0	0	0	0	0	0	0	0	0	0	0	0	0	0	0	0	0	0	0	0	0	0	0	0	0	0	0	0	0	1	0	0	0	0	1	0	0	0	0	0.05	0	0.1
Bergeyella sp. oral taxon 422	0	0	0	0	0	0	0	0	0	0	0	0	0	0	0	0	0	1	0	0	0	0	0	0	0	0	0	0	0	0	0	1	0	0	0	0	0	0	0	0	0.05	0.05	0.05
Capnocytophaga leadbetteri nov 97.89%	0	0	0	0	0	0	0	0	0	0	0	0	0	0	0	0	0	0	0	1	0	0	0	0	0	0	0	0	0	0	0	0	0	0	1	0	0	0	0	0	0.05	0.05	0.05
Capnocytophaga multispecies spp32 2	1	0	0	0	0	0	0	0	0	0	0	0	0	0	0	0	0	0	0	0	0	0	0	0	0	0	0	0	0	0	0	0	1	0	0	0	0	0	0	0	0.05	0.05	0.05
Capnocytophaga sp. oral taxon 323	0	0	0	0	0	0	0	0	0	0	0	0	0	0	0	0	0	0	1	0	0	0	0	0	0	0	0	0	0	0	0	0	0	0	0	0	0	0	1	0	0.05	0.05	0.05
Capnocytophaga sp. oral taxon 324	0	0	0	0	0	0	0	0	0	0	0	0	0	0	0	0	0	0	0	0	0	0	0	0	0	1	0	0	0	0	0	0	0	0	0	0	0	1	0	0	0.05	0	0.1
Capnocytophaga sp. oral taxon 335	0	0	0	0	0	0	0	0	0	0	0	0	1	0	0	0	0	0	0	0	0	0	0	0	0	0	0	0	0	0	0	0	1	0	0	0	0	0	0	0	0.05	0.05	0.05
Capnocytophaga sp. oral taxon 380	0	0	0	0	0	0	0	0	0	0	0	0	0	0	0	0	0	0	0	0	0	0	0	0	0	0	0	0	0	0	0	0	1	1	0	0	0	0	0	0	0.05	0	0.1
Capnocytophaga sp. oral taxon 878	0	0	0	0	0	0	0	0	1	0	0	0	0	0	0	0	0	0	0	0	0	0	0	0	0	0	0	0	0	0	1	0	0	0	0	0	0	0	0	0	0.05	0.05	0.05
Capnocytophaga sp. oral taxon 902	0	0	0	0	0	0	0	0	0	0	0	0	0	0	0	0	0	0	0	0	1	0	0	0	0	0	0	0	0	0	0	0	0	0	0	1	0	0	0	0	0.05	0	0.1
Flavitalea sp. oral taxon 320 nov 85.37%	0	1	0	0	0	0	0	1	0	0	0	0	0	0	0	0	0	0	0	0	0	0	0	0	0	0	0	0	0	0	0	0	0	0	0	0	0	0	0	0	0.05	0.1	0
Bacillus anthracis nov 84.63%	0	0	0	0	0	0	0	0	0	0	0	0	0	0	0	0	0	0	0	0	0	0	0	0	0	0	0	0	0	0	0	0	0	0	0	0	0	1	0	1	0.05	0	0.1
Bacillus subtilis nov 91.82%	0	0	0	0	0	0	0	1	0	0	0	0	0	0	0	0	1	0	0	0	0	0	0	0	0	0	0	0	0	0	0	0	0	0	0	0	0	0	0	0	0.05	0.1	0
Exiguobacterium acetylicum	0	1	0	0	0	0	0	0	0	0	0	0	0	0	0	0	0	0	0	0	0	0	0	0	0	0	0	0	0	0	0	0	0	0	0	0	0	0	1	0	0.05	0.05	0.05
Dolosigranulum pigrum	0	0	0	1	0	0	0	0	0	0	0	0	0	0	0	1	0	0	0	0	0	0	0	0	0	0	0	0	0	0	0	0	0	0	0	0	0	0	0	0	0.05	0.1	0
Enterococcus faecalis	0	0	0	0	0	0	0	0	0	1	0	0	0	1	0	0	0	0	0	0	0	0	0	0	0	0	0	0	0	0	0	0	0	0	0	0	0	0	0	0	0.05	0.1	0
Lactococcus lactis	0	0	0	0	0	0	0	0	0	1	0	0	0	0	0	0	0	0	0	0	0	0	0	0	0	0	0	0	0	0	0	1	0	0	0	0	0	0	0	0	0.05	0.05	0.05
Streptococcus dysgalactiae	0	0	0	0	0	0	0	0	0	0	0	0	0	0	0	0	1	1	0	0	0	0	0	0	0	0	0	0	0	0	0	0	0	0	0	0	0	0	0	0	0.05	0.1	0
Streptococcus multispecies spp11 2	0	0	0	0	0	0	0	0	0	0	0	0	0	0	0	0	0	0	0	0	0	0	0	0	0	0	0	0	0	0	0	0	1	0	1	0	0	0	0	0	0.05	0	0.1
Streptococcus multispecies spp15 2	0	0	0	0	0	0	0	0	0	0	0	0	0	0	0	0	0	0	0	0	0	0	0	0	0	0	0	0	1	0	0	0	0	0	0	0	0	1	0	0	0.05	0	0.1
Streptococcus oligofermentans	0	0	0	0	0	0	0	0	1	0	0	0	0	0	0	0	0	0	0	0	0	0	0	0	0	0	0	0	0	0	0	0	0	0	0	1	0	0	0	0	0.05	0.05	0.05
Johnsonella ignava	0	0	0	0	0	0	0	0	1	0	0	0	0	0	0	0	0	0	0	0	0	0	0	0	0	0	0	0	0	0	0	0	0	0	1	0	0	0	0	0	0.05	0.05	0.05
Lachnospiraceae [G-2] sp. oral taxon 088	0	0	0	0	0	0	0	0	1	0	0	0	0	0	1	0	0	0	0	0	0	0	0	0	0	0	0	0	0	0	0	0	0	0	0	0	0	0	0	0	0.05	0.1	0
Lachnospiraceae [G-7] sp. oral taxon 086 nov 87.65%	0	0	0	0	1	0	0	0	0	0	1	0	0	0	0	0	0	0	0	0	0	0	0	0	0	0	0	0	0	0	0	0	0	0	0	0	0	0	0	0	0.05	0.1	0
Oribacterium parvum	0	0	0	0	0	0	0	0	0	0	0	0	0	0	0	0	0	0	0	0	0	0	0	0	0	0	0	0	1	0	0	0	0	0	0	0	0	0	0	1	0.05	0	0.1
Stomatobaculum multispecies spp12 2	0	0	0	0	0	0	0	0	0	0	0	0	0	0	0	0	0	0	0	0	0	0	0	0	0	0	0	0	0	0	0	0	0	1	0	1	0	0	0	0	0.05	0	0.1
Coprococcus eutactus nov 78.28%	0	0	0	0	0	0	0	0	0	0	0	0	0	0	0	0	1	0	0	0	0	0	0	0	0	0	0	0	0	0	0	0	0	0	0	0	0	1	0	0	0.05	0.05	0.05
Lachnospiraceae [G] sp. Oral Taxon A17	0	0	0	0	1	0	0	0	0	0	0	0	0	0	0	0	1	0	0	0	0	0	0	0	0	0	0	0	0	0	0	0	0	0	0	0	0	0	0	0	0.05	0.1	0
Lachnospiraceae [G] sp. Oral Taxon B18	0	0	0	0	0	0	0	0	0	0	1	0	0	0	0	0	0	1	0	0	0	0	0	0	0	0	0	0	0	0	0	0	0	0	0	0	0	0	0	0	0.05	0.1	0
Parvimonas micra nov 97.70%	0	0	0	0	1	0	0	0	0	0	0	0	0	0	0	0	0	0	1	0	0	0	0	0	0	0	0	0	0	0	0	0	0	0	0	0	0	0	0	0	0.05	0.1	0
Peptoniphilus indolicus nov 97.71%	0	0	0	0	0	0	0	0	0	0	0	0	0	0	0	0	1	1	0	0	0	0	0	0	0	0	0	0	0	0	0	0	0	0	0	0	0	0	0	0	0.05	0.1	0
Peptoniphilus lacrimalis	0	0	0	0	0	0	0	0	0	0	0	0	1	0	0	0	1	0	0	0	0	0	0	0	0	0	0	0	0	0	0	0	0	0	0	0	0	0	0	0	0.05	0.1	0
Peptoclostridium sticklandii nov 79.75%	0	0	0	0	1	0	0	0	0	0	0	0	0	0	0	0	0	0	1	0	0	0	0	0	0	0	0	0	0	0	0	0	0	0	0	0	0	0	0	0	0.05	0.1	0
Ruminococcaceae [G-1] sp. oral taxon 075 nov 94.74%	0	0	0	0	0	0	0	0	0	0	0	0	0	0	0	0	0	1	0	0	0	0	0	0	0	0	0	0	0	0	0	0	0	0	0	0	1	0	0	0	0.05	0.05	0.05
Allobaculum stercoricanis nov 78.47%	0	0	0	0	0	0	0	0	0	0	0	0	0	0	0	0	0	0	0	0	0	0	0	0	0	0	0	0	1	0	0	0	0	0	0	1	0	0	0	0	0.05	0	0.1
Erysipelotrichaceae [G-1] sp. oral taxon 904	0	0	0	0	0	0	0	0	0	0	0	0	0	0	0	0	0	1	0	0	0	0	0	0	0	0	0	0	0	0	0	0	0	0	1	0	0	0	0	0	0.05	0.05	0.05
Erysipelotrichaceae [G-1] sp. oral taxon 905	0	0	0	0	0	0	0	0	1	0	0	0	0	0	0	0	0	1	0	0	0	0	0	0	0	0	0	0	0	0	0	0	0	0	0	0	0	0	0	0	0.05	0.1	0
Solobacterium moorei nov 97.10%	0	0	0	0	0	0	0	0	0	0	0	0	0	0	0	0	0	0	0	0	0	0	0	0	0	0	1	0	0	0	0	0	0	0	0	1	0	0	0	0	0.05	0	0.1
Mycoplasma orale	0	0	0	1	0	0	0	0	0	0	0	0	0	0	0	0	1	0	0	0	0	0	0	0	0	0	0	0	0	0	0	0	0	0	0	0	0	0	0	0	0.05	0.1	0
Selenomonas sp. oral taxon 126	0	0	0	0	1	0	0	0	0	0	0	0	0	0	0	0	0	0	0	0	0	0	0	0	0	0	0	0	0	0	0	0	0	0	1	0	0	0	0	0	0.05	0.05	0.05
Selenomonas sp. oral taxon 137 nov 95.70%	0	0	0	0	0	0	0	1	0	0	0	0	0	0	0	0	0	0	0	0	0	0	0	0	0	0	0	0	0	0	0	0	0	0	1	0	0	0	0	0	0.05	0.05	0.05
Selenomonas sp. oral taxon 138	0	0	0	0	0	0	0	0	0	0	0	0	0	0	0	0	0	0	0	0	0	0	0	0	0	1	0	0	0	0	0	0	1	0	0	0	0	0	0	0	0.05	0	0.1
Selenomonas sp. oral taxon 146	0	0	0	0	1	0	0	0	0	0	0	0	0	0	0	0	0	0	1	0	0	0	0	0	0	0	0	0	0	0	0	0	0	0	0	0	0	0	0	0	0.05	0.1	0
Selenomonas sp. oral taxon 479	0	0	0	0	1	0	0	0	0	0	0	0	0	0	0	0	0	0	0	0	0	0	0	0	0	1	0	0	0	0	0	0	0	0	0	0	0	0	0	0	0.05	0.05	0.05
Selenomonas sp. oral taxon 919	0	1	0	0	0	0	0	0	0	0	0	0	0	0	0	0	0	0	0	0	0	0	0	0	0	0	0	0	0	0	0	0	0	0	1	0	0	0	0	0	0.05	0.05	0.05
Veillonella atypica nov 95.14%	0	0	0	0	0	0	0	0	0	0	0	0	0	0	0	0	0	0	0	0	0	0	0	0	0	0	0	0	0	0	0	0	0	1	0	0	0	0	0	1	0.05	0	0.1
Veillonella parvula group nov 97.84%	0	0	0	0	0	0	0	0	0	0	0	0	0	0	0	0	0	0	0	0	0	0	0	1	0	0	1	0	0	0	0	0	0	0	0	0	0	0	0	0	0.05	0	0.1
Veillonellaceae [G-1] sp. oral taxon 129	0	0	1	0	0	0	0	0	0	0	0	0	0	0	0	0	0	0	0	0	0	0	0	0	0	0	0	0	0	0	0	0	0	0	0	0	0	0	0	1	0.05	0.05	0.05
Veillonellaceae [G-1] sp. oral taxon 135	0	0	0	0	0	0	0	0	0	0	0	0	0	0	0	0	0	1	0	0	0	0	0	0	0	0	0	0	0	0	0	0	0	0	1	0	0	0	0	0	0.05	0.05	0.05
Veillonellaceae [G-1] sp. oral taxon 145	0	0	0	0	0	0	0	0	0	0	0	0	0	0	0	0	0	1	0	0	0	0	0	0	0	0	0	0	0	0	0	0	0	0	1	0	0	0	0	0	0.05	0.05	0.05
Fusobacterium canifelinum	0	0	0	0	0	0	0	0	0	0	0	0	0	0	0	0	0	0	0	0	0	0	0	0	0	1	0	0	0	0	0	0	1	0	0	0	0	0	0	0	0.05	0	0.1
Fusobacterium naviforme	0	0	0	0	1	0	0	0	0	0	0	0	0	0	0	0	0	0	1	0	0	0	0	0	0	0	0	0	0	0	0	0	0	0	0	0	0	0	0	0	0.05	0.1	0
Fusobacterium nucleatum ss animalis	0	0	0	0	0	0	0	0	0	0	1	1	0	0	0	0	0	0	0	0	0	0	0	0	0	0	0	0	0	0	0	0	0	0	0	0	0	0	0	0	0.05	0.1	0
Fusobacterium nucleatum ss vincentii	0	0	0	0	0	0	0	0	0	0	1	0	0	0	1	0	0	0	0	0	0	0	0	0	0	0	0	0	0	0	0	0	0	0	0	0	0	0	0	0	0.05	0.1	0
Fusobacterium periodonticum nov 97.58%	0	0	0	0	0	0	0	0	0	0	0	0	0	0	0	0	0	0	0	0	0	0	0	0	0	0	0	0	0	0	0	0	0	1	0	1	0	0	0	0	0.05	0	0.1
Fusobacterium sp. oral taxon 370 nov 97.59%	0	0	0	0	0	0	0	0	1	0	0	0	0	0	0	0	0	1	0	0	0	0	0	0	0	0	0	0	0	0	0	0	0	0	0	0	0	0	0	0	0.05	0.1	0
Fusobacterium sp. oral taxon 370 nov 97.86%	0	0	0	0	1	0	0	0	0	0	0	0	0	0	1	0	0	0	0	0	0	0	0	0	0	0	0	0	0	0	0	0	0	0	0	0	0	0	0	0	0.05	0.1	0
Leptotrichia buccalis nov 90.28%	0	0	0	0	0	0	0	0	0	0	0	0	0	0	0	0	0	0	0	0	0	0	0	0	0	0	0	1	0	0	0	0	0	0	1	0	0	0	0	0	0.05	0	0.1
Leptotrichia sp. AF189244.1	0	0	0	0	0	0	0	0	0	0	0	0	0	0	0	0	0	0	0	0	0	0	0	0	0	0	0	0	0	1	0	0	0	0	0	0	0	1	0	0	0.05	0	0.1
Leptotrichia sp. oral taxon 218	0	0	0	0	0	0	0	0	0	0	0	1	0	0	0	0	0	0	0	0	0	0	0	0	0	0	0	0	0	0	0	0	0	1	0	0	0	0	0	0	0.05	0.05	0.05
Leptotrichia sp. oral taxon 225 nov 97.62%	0	0	0	0	0	0	0	0	0	0	1	0	0	0	0	0	0	0	0	0	0	0	0	0	0	0	0	0	0	0	0	0	1	0	0	0	0	0	0	0	0.05	0.05	0.05
Leptotrichia sp. oral taxon 909 nov 96.09%	0	0	0	0	0	0	0	0	0	0	0	0	0	0	0	0	0	0	0	0	0	0	0	0	0	1	0	0	0	0	0	0	0	1	0	0	0	0	0	0	0.05	0	0.1
Streptobacillus moniliformis nov 86.80%	0	0	0	0	1	0	0	0	0	0	0	0	0	0	0	0	0	0	0	0	0	0	0	0	0	0	0	0	0	0	0	0	0	1	0	0	0	0	0	0	0.05	0.05	0.05
GN02 [G-1] sp. oral taxon 872 nov 93.28%	0	0	0	0	0	0	0	0	0	0	1	0	0	0	0	0	0	0	0	0	0	0	0	0	0	0	0	0	0	0	0	0	0	0	0	0	1	0	0	0	0.05	0.05	0.05
Brevundimonas diminuta Oral Taxon D38	0	0	0	1	0	0	0	0	1	0	0	0	0	0	0	0	0	0	0	0	0	0	0	0	0	0	0	0	0	0	0	0	0	0	0	0	0	0	0	0	0.05	0.1	0
Afipia broomeae nov 93.14%	0	1	0	0	0	0	0	1	0	0	0	0	0	0	0	0	0	0	0	0	0	0	0	0	0	0	0	0	0	0	0	0	0	0	0	0	0	0	0	0	0.05	0.1	0
Bradyrhizobium multispecies spp27 2	0	1	0	0	0	0	0	1	0	0	0	0	0	0	0	0	0	0	0	0	0	0	0	0	0	0	0	0	0	0	0	0	0	0	0	0	0	0	0	0	0.05	0.1	0
Paracoccus marcusii Oral Taxon D41	0	0	0	0	0	0	0	0	0	0	0	0	0	0	0	0	0	0	0	0	0	1	0	0	0	0	0	0	0	0	0	1	0	0	0	0	0	0	0	0	0.05	0	0.1
Porphyrobacter tepidarius nov 96.31%	0	0	0	0	0	0	0	0	0	0	0	0	0	0	0	0	0	0	0	0	0	0	0	0	1	0	0	0	0	0	0	1	0	0	0	0	0	0	0	0	0.05	0	0.1
Sphingobium xenophagum	0	1	0	0	0	0	0	1	0	0	0	0	0	0	0	0	0	0	0	0	0	0	0	0	0	0	0	0	0	0	0	0	0	0	0	0	0	0	0	0	0.05	0.1	0
Sphingomonas echinoides	0	0	0	0	0	0	0	0	0	0	0	0	0	0	0	0	0	1	0	0	0	0	0	0	0	0	1	0	0	0	0	0	0	0	0	0	0	0	0	0	0.05	0.05	0.05
Sphingomonas echinoides nov 94.93%	0	1	0	0	0	0	0	1	0	0	0	0	0	0	0	0	0	0	0	0	0	0	0	0	0	0	0	0	0	0	0	0	0	0	0	0	0	0	0	0	0.05	0.1	0
Sphingomonas multispecies spp37 2	0	1	0	0	0	0	0	1	0	0	0	0	0	0	0	0	0	0	0	0	0	0	0	0	0	0	0	0	0	0	0	0	0	0	0	0	0	0	0	0	0.05	0.1	0
Sphingomonas sp. oral taxon 004 nov 80.40%	0	0	0	0	0	0	0	0	0	0	0	0	0	1	0	0	0	0	0	0	0	0	0	0	0	0	1	0	0	0	0	0	0	0	0	0	0	0	0	0	0.05	0.05	0.05
Sphingomonas sp. oral taxon 006 nov 92.26%	0	0	0	0	0	0	0	0	0	0	0	0	0	0	0	0	0	1	0	0	0	0	0	0	0	0	0	0	0	0	0	1	0	0	0	0	0	0	0	0	0.05	0.05	0.05
Sphingopyxis alaskensis	0	1	0	0	0	0	0	1	0	0	0	0	0	0	0	0	0	0	0	0	0	0	0	0	0	0	0	0	0	0	0	0	0	0	0	0	0	0	0	0	0.05	0.1	0
Burkholderia cepacia	0	1	0	0	0	0	0	1	0	0	0	0	0	0	0	0	0	0	0	0	0	0	0	0	0	0	0	0	0	0	0	0	0	0	0	0	0	0	0	0	0.05	0.1	0
Ralstonia pickettii	0	1	0	0	0	0	0	1	0	0	0	0	0	0	0	0	0	0	0	0	0	0	0	0	0	0	0	0	0	0	0	0	0	0	0	0	0	0	0	0	0.05	0.1	0
Burkholderiales [G] sp. Oral Taxon A57	0	0	0	0	0	0	1	0	0	0	0	0	0	0	0	0	0	0	0	0	0	0	0	0	0	0	0	0	0	0	0	1	0	0	0	0	0	0	0	0	0.05	0.05	0.05
Ottowia sp. oral taxon 894 nov 97.30%	0	0	0	0	0	0	0	1	1	0	0	0	0	0	0	0	0	0	0	0	0	0	0	0	0	0	0	0	0	0	0	0	0	0	0	0	0	0	0	0	0.05	0.1	0
Schlegelella aquatica	0	0	0	0	0	0	0	0	0	0	0	0	0	0	0	0	0	0	0	0	0	0	0	0	0	0	0	0	0	0	0	1	0	0	0	0	0	0	1	0	0.05	0	0.1
Chromobacterium violaceum nov 82.41%	0	0	0	0	0	0	0	0	0	0	0	0	0	0	0	0	0	0	0	0	0	0	0	0	0	0	0	0	1	0	1	0	0	0	0	0	0	0	0	0	0.05	0	0.1
Kingella kingae	1	0	0	0	0	0	0	0	0	0	0	0	0	0	0	0	0	0	1	0	0	0	0	0	0	0	0	0	0	0	0	0	0	0	0	0	0	0	0	0	0.05	0.1	0
Kingella kingae nov 96.72%	0	0	0	0	0	0	0	0	0	0	1	0	0	0	0	0	0	0	0	0	0	0	0	0	0	0	0	0	0	0	1	0	0	0	0	0	0	0	0	0	0.05	0.05	0.05
Kingella sp. Oral Taxon C21	0	0	0	0	0	0	1	0	0	0	0	0	0	0	0	0	0	0	0	0	0	0	0	0	0	0	0	0	0	0	0	0	0	1	0	0	0	0	0	0	0.05	0.05	0.05
Kingella sp. oral taxon 932	0	0	0	0	0	0	0	0	0	0	0	0	0	0	0	0	0	0	0	0	0	0	0	0	0	0	0	1	1	0	0	0	0	0	0	0	0	0	0	0	0.05	0	0.1
Neisseria flavescens|subflava nov 91.57%	0	0	0	0	0	0	0	0	0	0	0	0	0	0	0	0	0	0	0	0	0	0	1	0	0	0	0	0	0	0	0	0	0	0	0	1	0	0	0	0	0.05	0	0.1
Neisseria flavescens|subflava nov 94.37%	0	0	0	0	0	0	0	0	0	0	0	0	0	0	1	0	0	0	0	0	0	0	0	0	0	1	0	0	0	0	0	0	0	0	0	0	0	0	0	0	0.05	0.05	0.05
Neisseria meningitidis	0	0	0	0	0	0	0	0	0	0	0	0	0	0	0	0	0	0	0	0	0	0	0	0	1	0	0	0	0	0	0	0	0	0	0	1	0	0	0	0	0.05	0	0.1
Simonsiella muelleri	0	0	0	0	0	0	0	0	0	0	0	0	0	0	0	0	0	0	0	0	0	0	0	0	1	1	0	0	0	0	0	0	0	0	0	0	0	0	0	0	0.05	0	0.1
Campylobacter concisus nov 97.61%	0	0	0	0	0	0	0	0	0	0	0	0	0	0	0	0	1	0	0	0	0	0	0	0	0	0	0	0	0	0	0	0	0	0	0	0	0	0	0	1	0.05	0.05	0.05
Campylobacter ureolyticus	0	0	0	0	1	0	0	0	0	0	0	0	0	1	0	0	0	0	0	0	0	0	0	0	0	0	0	0	0	0	0	0	0	0	0	0	0	0	0	0	0.05	0.1	0
Aeromonas multispecies spp44 3	1	0	0	0	0	0	0	0	0	0	0	0	0	0	0	1	0	0	0	0	0	0	0	0	0	0	0	0	0	0	0	0	0	0	0	0	0	0	0	0	0.05	0.1	0
Morganella morganii	0	0	0	0	0	0	0	0	0	0	0	0	0	1	0	1	0	0	0	0	0	0	0	0	0	0	0	0	0	0	0	0	0	0	0	0	0	0	0	0	0.05	0.1	0
Citrobacter sp. str. KMSI 3	0	0	0	0	0	0	0	0	0	1	0	1	0	0	0	0	0	0	0	0	0	0	0	0	0	0	0	0	0	0	0	0	0	0	0	0	0	0	0	0	0.05	0.1	0
Enterobacter cancerogenus	0	0	0	0	0	0	0	0	0	1	0	0	0	0	0	1	0	0	0	0	0	0	0	0	0	0	0	0	0	0	0	0	0	0	0	0	0	0	0	0	0.05	0.1	0
Enterobacter hormaechei	0	0	0	0	0	0	0	0	0	0	0	0	0	1	0	1	0	0	0	0	0	0	0	0	0	0	0	0	0	0	0	0	0	0	0	0	0	0	0	0	0.05	0.1	0
Klebsiella sp. Oral Taxon A36	0	0	0	0	0	0	0	0	0	1	0	0	0	0	0	0	0	1	0	0	0	0	0	0	0	0	0	0	0	0	0	0	0	0	0	0	0	0	0	0	0.05	0.1	0
Proteus mirabilis	0	0	0	0	0	0	0	0	0	0	0	0	0	1	0	1	0	0	0	0	0	0	0	0	0	0	0	0	0	0	0	0	0	0	0	0	0	0	0	0	0.05	0.1	0
Aggregatibacter aphrophilus	0	0	0	0	0	0	0	0	0	0	0	0	0	0	0	0	0	0	0	0	0	0	0	0	0	0	0	0	0	0	0	0	1	0	0	0	0	0	0	1	0.05	0	0.1
Aggregatibacter sp. oral taxon 512 nov 96.36%	0	0	0	0	0	0	0	0	0	0	0	0	0	0	0	0	0	0	1	0	0	0	0	0	0	0	0	0	0	0	0	0	0	0	0	1	0	0	0	0	0.05	0.05	0.05
Haemophilus parainfluenzae nov 97.76%	0	0	0	0	0	0	0	0	0	0	0	0	0	0	0	0	0	0	0	0	0	0	0	0	0	0	0	0	0	0	1	0	0	0	0	1	0	0	0	0	0.05	0	0.1
Haemophilus pittmaniae nov 81.14%	0	0	0	0	0	0	0	0	0	0	0	0	0	0	0	0	0	0	0	0	0	0	0	1	0	0	0	0	0	0	0	0	0	0	0	1	0	0	0	0	0.05	0	0.1
Haemophilus sp. Oral Taxon C82	0	0	0	0	0	0	0	0	0	0	0	0	0	0	0	0	0	0	0	0	0	0	0	0	0	0	0	0	1	0	1	0	0	0	0	0	0	0	0	0	0.05	0	0.1
Haemophilus sp. oral taxon 908 nov 97.35%	0	0	0	0	0	0	0	0	0	0	0	0	0	1	0	0	0	0	0	0	0	0	0	0	0	0	0	1	0	0	0	0	0	0	0	0	0	0	0	0	0.05	0.05	0.05
Acinetobacter seohaensis	0	0	0	0	0	0	1	0	0	0	0	0	0	0	0	0	0	0	0	0	1	0	0	0	0	0	0	0	0	0	0	0	0	0	0	0	0	0	0	0	0.05	0.05	0.05
Moraxella nonliquefaciens	0	0	0	1	0	0	0	0	1	0	0	0	0	0	0	0	0	0	0	0	0	0	0	0	0	0	0	0	0	0	0	0	0	0	0	0	0	0	0	0	0.05	0.1	0
Pseudomonas aeruginosa nov 94.44%	0	0	0	0	0	0	0	0	0	1	0	0	0	0	0	1	0	0	0	0	0	0	0	0	0	0	0	0	0	0	0	0	0	0	0	0	0	0	0	0	0.05	0.1	0
Pseudomonas mosselii Oral Taxon A88	0	0	1	0	0	0	0	0	0	0	0	0	0	0	0	0	0	0	0	0	0	0	0	0	0	0	0	0	0	0	0	0	0	0	0	0	1	0	0	0	0.05	0.05	0.05
Pseudomonas sp. Oral Taxon C61	1	0	0	0	0	0	0	0	0	0	0	0	0	0	0	0	0	1	0	0	0	0	0	0	0	0	0	0	0	0	0	0	0	0	0	0	0	0	0	0	0.05	0.1	0
Pseudomonas stutzeri	0	0	0	0	0	0	1	0	0	0	0	0	0	0	0	0	0	0	0	0	0	0	0	0	0	0	0	0	0	0	0	0	0	0	0	0	0	0	1	0	0.05	0.05	0.05
TM7 [G-1] sp. oral taxon 869 nov 83.88%	0	0	0	0	0	0	0	0	0	0	0	0	0	0	0	0	0	0	0	0	0	0	0	0	0	1	0	0	0	0	0	0	1	0	0	0	0	0	0	0	0.05	0	0.1
Treponema multispecies spp3 2	0	0	0	0	0	0	0	0	0	0	1	0	0	0	0	0	0	1	0	0	0	0	0	0	0	0	0	0	0	0	0	0	0	0	0	0	0	0	0	0	0.05	0.1	0
Treponema putidum	0	0	0	0	0	0	0	0	1	0	0	0	0	0	0	0	0	1	0	0	0	0	0	0	0	0	0	0	0	0	0	0	0	0	0	0	0	0	0	0	0.05	0.1	0
Treponema socranskii nov 97.74%	0	0	0	0	0	0	0	0	1	0	0	0	0	0	0	0	0	0	0	0	0	0	0	0	0	0	0	0	0	0	0	0	0	0	0	0	1	0	0	0	0.05	0.05	0.05
Treponema sp. oral taxon 242	0	0	0	0	0	0	0	0	1	0	0	0	0	0	0	0	0	0	0	0	0	0	0	0	0	0	0	0	0	0	0	0	0	0	1	0	0	0	0	0	0.05	0.05	0.05
Treponema sp. oral taxon 247	0	0	0	0	0	0	0	0	0	0	0	0	0	0	0	0	0	1	0	0	0	0	0	0	0	0	0	0	0	0	0	0	0	0	1	0	0	0	0	0	0.05	0.05	0.05
Treponema sp. oral taxon 253	0	0	0	0	0	0	0	0	0	0	0	0	0	0	0	0	0	1	0	0	0	0	0	0	0	0	0	0	0	0	0	0	1	0	0	0	0	0	0	0	0.05	0.05	0.05
Treponema sp. oral taxon 257	0	0	0	0	0	0	0	0	0	0	0	0	0	0	0	0	0	0	0	0	0	0	0	0	0	0	0	0	0	0	0	0	0	0	1	0	0	0	1	0	0.05	0	0.1
Treponema sp. oral taxon 260	0	0	0	0	1	0	0	0	0	0	0	0	0	0	0	0	0	1	0	0	0	0	0	0	0	0	0	0	0	0	0	0	0	0	0	0	0	0	0	0	0.05	0.1	0
Treponema sp. oral taxon 517	0	0	0	0	1	0	0	0	0	0	0	0	0	0	0	0	0	1	0	0	0	0	0	0	0	0	0	0	0	0	0	0	0	0	0	0	0	0	0	0	0.05	0.1	0
Candidatus Phytoplasma asteris nov 78.62%	0	0	0	0	0	0	0	0	1	0	0	0	0	0	0	0	0	1	0	0	0	0	0	0	0	0	0	0	0	0	0	0	0	0	0	0	0	0	0	0	0.05	0.1	0
Calycanthus floridus Oral Taxon D07	0	0	0	0	0	0	0	0	0	0	0	0	0	0	0	0	0	0	0	0	0	0	0	0	0	0	0	1	0	0	0	1	0	0	0	0	0	0	0	0	0.05	0	0.1
Actinobaculum sp. oral taxon 183	0	0	0	0	0	0	0	0	0	0	0	0	0	0	0	0	0	0	0	0	0	0	0	0	0	0	0	0	0	0	0	1	0	0	0	0	0	0	0	0	0.025	0	0.05
Actinobaculum sp. oral taxon 848	0	0	0	0	0	0	0	0	0	0	0	0	0	0	0	0	0	0	0	0	0	0	0	0	0	0	0	0	0	0	0	0	0	0	0	0	0	0	1	0	0.025	0	0.05
Actinomyces sp. oral taxon 172 nov 96.10%	0	0	0	0	0	0	0	0	0	0	0	0	0	0	0	0	0	0	0	0	0	0	0	0	0	0	0	0	0	0	0	0	0	0	0	0	0	0	0	1	0.025	0	0.05
Actinomyces sp. oral taxon 175 nov 97.97%	0	0	0	0	0	0	0	0	0	0	0	0	0	0	0	0	0	0	0	0	0	0	0	0	0	0	0	0	0	0	0	1	0	0	0	0	0	0	0	0	0.025	0	0.05
Actinomyces sp. oral taxon 896	0	0	0	0	0	0	0	0	0	0	0	0	0	0	0	0	0	0	0	0	0	0	0	0	0	1	0	0	0	0	0	0	0	0	0	0	0	0	0	0	0.025	0	0.05
Actinomyces sp. oral taxon 897	0	0	0	0	0	0	0	0	0	0	0	0	0	0	0	0	0	0	0	0	0	0	0	0	0	0	0	0	0	0	0	0	1	0	0	0	0	0	0	0	0.025	0	0.05
Actinomyces timonensis nov 92.97%	0	0	0	0	0	0	0	0	0	0	0	0	0	0	1	0	0	0	0	0	0	0	0	0	0	0	0	0	0	0	0	0	0	0	0	0	0	0	0	0	0.025	0.05	0
Actinomyces viscosus	0	0	0	0	0	0	0	0	0	0	0	0	0	0	0	0	0	0	0	0	0	0	0	0	0	0	0	0	0	0	0	1	0	0	0	0	0	0	0	0	0.025	0	0.05
Mobiluncus mulieris	0	0	0	0	0	0	0	0	0	0	0	0	0	1	0	0	0	0	0	0	0	0	0	0	0	0	0	0	0	0	0	0	0	0	0	0	0	0	0	0	0.025	0.05	0
Corynebacterium aurimucosum	0	0	0	0	1	0	0	0	0	0	0	0	0	0	0	0	0	0	0	0	0	0	0	0	0	0	0	0	0	0	0	0	0	0	0	0	0	0	0	0	0.025	0.05	0
Corynebacterium pseudodiphtheriticum	0	0	0	0	0	0	0	0	0	0	0	0	1	0	0	0	0	0	0	0	0	0	0	0	0	0	0	0	0	0	0	0	0	0	0	0	0	0	0	0	0.025	0.05	0
Corynebacterium simulans Oral Taxon A35	0	0	0	0	0	0	0	0	0	0	0	0	0	0	0	0	0	0	0	0	0	0	0	0	0	0	0	0	0	0	0	1	0	0	0	0	0	0	0	0	0.025	0	0.05
Corynebacterium sp. Oral Taxon A46	0	0	0	0	0	0	0	0	0	0	0	0	0	0	0	0	0	0	0	0	0	0	0	0	0	0	0	0	0	0	0	0	1	0	0	0	0	0	0	0	0.025	0	0.05
Corynebacterium sundsvallense	0	0	0	0	0	0	0	0	0	0	0	1	0	0	0	0	0	0	0	0	0	0	0	0	0	0	0	0	0	0	0	0	0	0	0	0	0	0	0	0	0.025	0.05	0
Brachybacterium sp. Oral Taxon A83	0	1	0	0	0	0	0	0	0	0	0	0	0	0	0	0	0	0	0	0	0	0	0	0	0	0	0	0	0	0	0	0	0	0	0	0	0	0	0	0	0.025	0.05	0
Brachybacterium sp. Oral Taxon D23	0	0	0	0	0	0	0	0	0	0	0	0	0	0	0	0	0	1	0	0	0	0	0	0	0	0	0	0	0	0	0	0	0	0	0	0	0	0	0	0	0.025	0.05	0
Blastococcus saxobsidens	0	0	0	0	0	0	0	0	0	0	0	0	0	0	0	0	0	0	0	0	0	0	0	0	0	0	0	1	0	0	0	0	0	0	0	0	0	0	0	0	0.025	0	0.05
Gordonia aichiensis Oral Taxon D37	0	0	0	0	0	0	0	0	0	0	0	0	0	0	0	0	0	0	0	0	0	0	0	0	0	0	0	0	0	0	0	1	0	0	0	0	0	0	0	0	0.025	0	0.05
Agrococcus baldri Oral Taxon A19 nov 78.64%	0	0	0	0	0	0	0	0	0	0	1	0	0	0	0	0	0	0	0	0	0	0	0	0	0	0	0	0	0	0	0	0	0	0	0	0	0	0	0	0	0.025	0.05	0
Arthrobacter sp. str. FB24	0	0	0	0	0	1	0	0	0	0	0	0	0	0	0	0	0	0	0	0	0	0	0	0	0	0	0	0	0	0	0	0	0	0	0	0	0	0	0	0	0.025	0.05	0
Kocuria sp. oral taxon 189 nov 85.92%	0	0	0	0	0	0	0	0	0	0	0	0	0	0	0	0	0	0	0	0	0	0	0	0	0	0	1	0	0	0	0	0	0	0	0	0	0	0	0	0	0.025	0	0.05
Kocuria sp. oral taxon 189 nov 86.28%	0	0	0	0	0	0	0	0	0	0	1	0	0	0	0	0	0	0	0	0	0	0	0	0	0	0	0	0	0	0	0	0	0	0	0	0	0	0	0	0	0.025	0.05	0
Kocuria sp. oral taxon 189 nov 96.82%	0	0	0	1	0	0	0	0	0	0	0	0	0	0	0	0	0	0	0	0	0	0	0	0	0	0	0	0	0	0	0	0	0	0	0	0	0	0	0	0	0.025	0.05	0
Micrococcus luteus Oral Taxon C78	0	0	0	0	0	0	0	0	0	0	0	0	0	0	0	0	0	0	0	0	0	0	0	0	0	0	0	0	0	0	0	1	0	0	0	0	0	0	0	0	0.025	0	0.05
Rothia mucilaginosa nov 87.65%	0	0	0	0	0	0	0	0	0	0	0	0	0	0	0	0	0	0	0	0	0	0	0	0	0	0	1	0	0	0	0	0	0	0	0	0	0	0	0	0	0.025	0	0.05
Propionibacterium acidipropionici Oral Taxon A80 nov 88.84%	0	0	0	0	0	0	0	0	0	0	0	0	0	0	0	0	0	0	0	0	0	0	0	0	0	0	0	0	0	0	0	0	1	0	0	0	0	0	0	0	0.025	0	0.05
Bifidobacterium adolescentis	0	0	0	0	0	0	0	0	0	0	0	0	1	0	0	0	0	0	0	0	0	0	0	0	0	0	0	0	0	0	0	0	0	0	0	0	0	0	0	0	0.025	0.05	0
Bifidobacterium animalis	0	0	0	0	0	0	0	0	0	0	0	0	0	0	0	0	0	0	0	1	0	0	0	0	0	0	0	0	0	0	0	0	0	0	0	0	0	0	0	0	0.025	0.05	0
Bifidobacterium breve	0	0	0	0	0	0	0	0	0	0	0	0	0	0	0	0	0	1	0	0	0	0	0	0	0	0	0	0	0	0	0	0	0	0	0	0	0	0	0	0	0.025	0.05	0
Bifidobacterium kashiwanohense	0	0	0	0	0	0	0	0	0	0	0	0	0	0	0	0	0	1	0	0	0	0	0	0	0	0	0	0	0	0	0	0	0	0	0	0	0	0	0	0	0.025	0.05	0
Bifidobacterium thermacidophilum	0	0	0	0	0	0	0	0	0	0	0	0	0	0	0	0	0	0	0	0	0	0	0	0	0	0	0	0	0	0	0	1	0	0	0	0	0	0	0	0	0.025	0	0.05
Parascardovia denticolens	0	0	0	0	0	0	0	0	0	0	0	0	0	0	0	0	0	0	0	0	0	0	0	1	0	0	0	0	0	0	0	0	0	0	0	0	0	0	0	0	0.025	0	0.05
Scardovia inopinata	0	0	0	0	0	0	0	0	0	0	0	0	0	0	0	0	0	0	0	0	0	0	0	0	0	0	0	1	0	0	0	0	0	0	0	0	0	0	0	0	0.025	0	0.05
Corynebacterium afermentans	0	0	0	0	0	0	0	0	0	0	0	0	0	0	0	0	0	0	0	0	0	0	0	0	0	0	0	0	0	0	0	0	0	0	0	0	1	0	0	0	0.025	0	0.05
Corynebacterium argentoratense	0	0	0	0	0	0	0	0	0	0	0	0	0	0	0	0	0	0	0	0	0	0	0	0	0	0	0	0	0	0	0	0	0	0	1	0	0	0	0	0	0.025	0	0.05
Corynebacterium durum nov 96.72%	0	0	0	0	0	0	0	0	0	0	0	0	0	0	0	0	0	0	0	0	0	0	0	0	0	1	0	0	0	0	0	0	0	0	0	0	0	0	0	0	0.025	0	0.05
Corynebacterium matruchotii nov 92.17%	0	0	0	0	0	0	0	0	0	0	0	0	1	0	0	0	0	0	0	0	0	0	0	0	0	0	0	0	0	0	0	0	0	0	0	0	0	0	0	0	0.025	0.05	0
Corynebacterium matruchotii nov 96.76%	0	0	0	0	0	0	0	0	1	0	0	0	0	0	0	0	0	0	0	0	0	0	0	0	0	0	0	0	0	0	0	0	0	0	0	0	0	0	0	0	0.025	0.05	0
Corynebacterium matruchotii nov 97.17%	0	0	0	0	0	0	0	0	0	0	0	0	0	0	0	0	0	0	0	0	0	0	0	0	0	1	0	0	0	0	0	0	0	0	0	0	0	0	0	0	0.025	0	0.05
Corynebacterium mucifaciens	0	0	0	0	0	0	0	0	0	0	0	0	0	0	0	0	0	0	0	0	0	0	0	0	0	0	0	1	0	0	0	0	0	0	0	0	0	0	0	0	0.025	0	0.05
Corynebacterium mucifaciens nov 91.68%	0	0	0	0	0	0	0	0	0	0	0	0	0	0	0	0	0	0	0	0	0	0	0	0	0	0	0	0	0	0	0	0	0	0	0	0	1	0	0	0	0.025	0	0.05
Corynebacterium mucifaciens nov 97.63%	0	0	0	0	0	0	0	0	0	0	0	0	0	0	0	0	0	0	0	0	0	0	0	0	0	0	0	0	0	0	0	1	0	0	0	0	0	0	0	0	0.025	0	0.05
Corynebacterium tuscaniense nov 94.67%	0	0	0	0	0	0	0	0	0	0	0	0	0	0	0	0	0	0	0	0	0	0	0	0	0	0	0	0	0	0	0	0	0	0	0	0	1	0	0	0	0.025	0	0.05
Corynebacterium urealyticum nov 82.43%	0	0	0	0	0	0	0	0	0	0	0	0	0	0	0	0	0	0	0	0	0	0	0	0	0	1	0	0	0	0	0	0	0	0	0	0	0	0	0	0	0.025	0	0.05
Corynebacterium variabile	0	0	0	0	0	0	0	0	0	0	0	0	0	0	0	0	0	0	0	0	0	0	0	0	0	0	0	1	0	0	0	0	0	0	0	0	0	0	0	0	0.025	0	0.05
Mycobacterium neoaurum nov 89.34%	0	0	0	0	0	0	0	0	0	0	0	0	0	0	0	0	0	0	0	0	0	0	0	0	0	0	0	0	0	0	0	1	0	0	0	0	0	0	0	0	0.025	0	0.05
Geodermatophilus sabuli	0	0	1	0	0	0	0	0	0	0	0	0	0	0	0	0	0	0	0	0	0	0	0	0	0	0	0	0	0	0	0	0	0	0	0	0	0	0	0	0	0.025	0.05	0
Brevibacterium casei	0	0	0	0	0	0	0	0	0	0	0	0	0	0	0	0	0	0	0	0	0	0	0	0	0	0	0	0	0	0	0	0	0	0	0	0	1	0	0	0	0.025	0	0.05
Brevibacterium siliguriense	0	0	0	0	0	0	0	0	0	0	0	0	1	0	0	0	0	0	0	0	0	0	0	0	0	0	0	0	0	0	0	0	0	0	0	0	0	0	0	0	0.025	0.05	0
Dermabacter hominis	0	0	0	0	0	0	0	0	0	0	0	0	0	0	0	0	0	0	0	0	0	0	0	0	0	0	0	0	0	0	0	1	0	0	0	0	0	0	0	0	0.025	0	0.05
Arsenicicoccus bolidensis nov 85.03%	0	0	0	0	0	0	0	0	0	0	0	0	0	0	0	0	0	0	0	0	0	0	0	0	0	0	0	0	0	0	0	0	0	0	0	1	0	0	0	0	0.025	0	0.05
Knoellia subterranea nov 82.55%	0	0	0	0	0	0	0	0	0	0	0	0	0	0	0	0	0	0	0	0	0	0	0	0	0	0	0	0	0	0	0	0	0	0	0	0	1	0	0	0	0.025	0	0.05
Chryseoglobus frigidaquae	0	1	0	0	0	0	0	0	0	0	0	0	0	0	0	0	0	0	0	0	0	0	0	0	0	0	0	0	0	0	0	0	0	0	0	0	0	0	0	0	0.025	0.05	0
Cryobacterium psychrophilum nov 80.04%	0	0	0	0	0	0	0	0	0	0	0	0	0	0	0	0	0	0	0	0	0	0	0	0	0	0	0	0	0	0	1	0	0	0	0	0	0	0	0	0	0.025	0	0.05
Microbacterium hydrothermale	0	1	0	0	0	0	0	0	0	0	0	0	0	0	0	0	0	0	0	0	0	0	0	0	0	0	0	0	0	0	0	0	0	0	0	0	0	0	0	0	0.025	0.05	0
Microbacterium paraoxydans	0	0	0	0	0	0	0	0	0	0	0	0	0	0	0	0	0	0	0	0	0	0	0	0	0	0	0	0	0	0	0	0	0	0	0	0	0	0	1	0	0.025	0	0.05
Microbacterium trichothecenolyticum	0	0	0	0	0	0	0	1	0	0	0	0	0	0	0	0	0	0	0	0	0	0	0	0	0	0	0	0	0	0	0	0	0	0	0	0	0	0	0	0	0.025	0.05	0
Arthrobacter humicola	0	0	0	0	0	1	0	0	0	0	0	0	0	0	0	0	0	0	0	0	0	0	0	0	0	0	0	0	0	0	0	0	0	0	0	0	0	0	0	0	0.025	0.05	0
Glutamicibacter creatinolyticus nov 78.96%	0	0	0	0	0	0	0	0	0	0	0	0	0	0	0	0	0	0	0	0	0	0	0	0	0	1	0	0	0	0	0	0	0	0	0	0	0	0	0	0	0.025	0	0.05
Kocuria carniphila	1	0	0	0	0	0	0	0	0	0	0	0	0	0	0	0	0	0	0	0	0	0	0	0	0	0	0	0	0	0	0	0	0	0	0	0	0	0	0	0	0.025	0.05	0
Kocuria gwangalliensis	1	0	0	0	0	0	0	0	0	0	0	0	0	0	0	0	0	0	0	0	0	0	0	0	0	0	0	0	0	0	0	0	0	0	0	0	0	0	0	0	0.025	0.05	0
Nesterenkonia lutea nov 79.05%	0	0	0	0	0	0	0	0	0	0	1	0	0	0	0	0	0	0	0	0	0	0	0	0	0	0	0	0	0	0	0	0	0	0	0	0	0	0	0	0	0.025	0.05	0
Nesterenkonia rhizosphaerae	0	0	1	0	0	0	0	0	0	0	0	0	0	0	0	0	0	0	0	0	0	0	0	0	0	0	0	0	0	0	0	0	0	0	0	0	0	0	0	0	0.025	0.05	0
Propionibacterium sp. oral taxon 192 nov 95.93%	0	0	0	0	0	0	0	0	0	0	0	0	0	0	0	0	0	0	0	0	0	0	0	0	0	0	0	0	0	0	0	0	0	0	0	0	1	0	0	0	0.025	0	0.05
Propionibacterium sp. oral taxon 193	0	0	0	0	0	1	0	0	0	0	0	0	0	0	0	0	0	0	0	0	0	0	0	0	0	0	0	0	0	0	0	0	0	0	0	0	0	0	0	0	0.025	0.05	0
Propionibacterium sp. oral taxon 194	0	0	0	0	0	0	0	0	0	0	0	0	0	0	0	0	0	0	0	0	0	0	0	0	0	0	0	0	0	1	0	0	0	0	0	0	0	0	0	0	0.025	0	0.05
Propionibacterium sp. oral taxon 915 nov 89.66%	1	0	0	0	0	0	0	0	0	0	0	0	0	0	0	0	0	0	0	0	0	0	0	0	0	0	0	0	0	0	0	0	0	0	0	0	0	0	0	0	0.025	0.05	0
Pseudonocardia sichuanensis	0	0	0	0	0	0	0	0	0	0	0	0	0	0	0	0	0	1	0	0	0	0	0	0	0	0	0	0	0	0	0	0	0	0	0	0	0	0	0	0	0.025	0.05	0
Olsenella sp. oral taxon 809	0	0	0	0	0	0	0	0	0	0	0	0	0	0	0	0	0	1	0	0	0	0	0	0	0	0	0	0	0	0	0	0	0	0	0	0	0	0	0	0	0.025	0.05	0
Atopobium parvulum nov 96.79%	0	0	0	0	0	0	0	0	0	0	0	0	0	0	0	0	0	0	0	0	0	0	0	0	0	0	1	0	0	0	0	0	0	0	0	0	0	0	0	0	0.025	0	0.05
Atopobium sp. oral taxon 810	0	0	0	0	0	0	0	0	0	0	0	0	0	0	0	0	0	1	0	0	0	0	0	0	0	0	0	0	0	0	0	0	0	0	0	0	0	0	0	0	0.025	0.05	0
Coriobacterium glomerans nov 79.87%	0	0	0	0	0	0	0	0	0	0	0	0	0	0	0	0	0	0	0	0	0	0	0	0	0	0	0	0	0	0	0	0	0	0	0	0	0	0	0	1	0.025	0	0.05
Eggerthella lenta nov 86.92%	0	0	0	0	0	0	0	0	0	0	0	0	0	0	0	0	0	1	0	0	0	0	0	0	0	0	0	0	0	0	0	0	0	0	0	0	0	0	0	0	0.025	0.05	0
Porphyromonas sp. Oral Taxon C34	0	0	0	0	0	0	0	0	0	0	0	0	0	0	0	0	0	0	0	0	0	0	0	0	1	0	0	0	0	0	0	0	0	0	0	0	0	0	0	0	0.025	0	0.05
Bacteroidetes [G-3] sp. oral taxon 365	0	1	0	0	0	0	0	0	0	0	0	0	0	0	0	0	0	0	0	0	0	0	0	0	0	0	0	0	0	0	0	0	0	0	0	0	0	0	0	0	0.025	0.05	0
Bacteroidetes [G-3] sp. oral taxon 503	0	0	0	0	0	0	0	0	0	0	0	0	0	0	0	0	0	0	0	0	0	0	0	0	0	0	0	0	0	0	0	0	0	0	1	0	0	0	0	0	0.025	0	0.05
Bacteroidetes [G-5] sp. oral taxon 505 nov 95.45%	0	0	0	0	0	0	0	0	0	0	0	0	0	0	0	0	0	0	0	0	0	0	0	0	0	0	0	0	0	0	0	0	0	0	1	0	0	0	0	0	0.025	0	0.05
Bacteroidetes [G-5] sp. oral taxon 505 nov 97.11%	0	0	0	0	0	0	0	0	0	0	0	0	0	0	0	0	0	0	0	0	0	0	0	0	0	0	0	0	0	0	0	0	0	0	1	0	0	0	0	0	0.025	0	0.05
Bacteroidetes [G-5] sp. oral taxon 507 nov 78.05%	0	0	0	0	0	0	0	0	0	0	0	0	0	0	0	0	0	1	0	0	0	0	0	0	0	0	0	0	0	0	0	0	0	0	0	0	0	0	0	0	0.025	0.05	0
Bacteroidetes [G-5] sp. oral taxon 511 nov 86.71%	0	0	0	0	0	0	0	0	0	0	1	0	0	0	0	0	0	0	0	0	0	0	0	0	0	0	0	0	0	0	0	0	0	0	0	0	0	0	0	0	0.025	0.05	0
Bacteroidetes [G-5] sp. oral taxon 511 nov 96.08%	0	0	0	0	1	0	0	0	0	0	0	0	0	0	0	0	0	0	0	0	0	0	0	0	0	0	0	0	0	0	0	0	0	0	0	0	0	0	0	0	0.025	0.05	0
Bacteroidetes [G-5] sp. oral taxon 511 nov 97.93%	0	0	0	0	1	0	0	0	0	0	0	0	0	0	0	0	0	0	0	0	0	0	0	0	0	0	0	0	0	0	0	0	0	0	0	0	0	0	0	0	0.025	0.05	0
Bacteroides ovatus	0	0	0	0	0	0	0	0	1	0	0	0	0	0	0	0	0	0	0	0	0	0	0	0	0	0	0	0	0	0	0	0	0	0	0	0	0	0	0	0	0.025	0.05	0
Bacteroides pyogenes nov 83.93%	0	0	0	0	0	0	0	0	0	0	0	0	0	0	0	0	0	1	0	0	0	0	0	0	0	0	0	0	0	0	0	0	0	0	0	0	0	0	0	0	0.025	0.05	0
Bacteroides zoogleoformans nov 88.24%	0	0	0	0	0	0	0	0	0	0	1	0	0	0	0	0	0	0	0	0	0	0	0	0	0	0	0	0	0	0	0	0	0	0	0	0	0	0	0	0	0.025	0.05	0
Bacteroides zoogleoformans nov 89.07%	0	0	0	0	0	0	0	0	1	0	0	0	0	0	0	0	0	0	0	0	0	0	0	0	0	0	0	0	0	0	0	0	0	0	0	0	0	0	0	0	0.025	0.05	0
Bacteroides zoogleoformans nov 89.25%	0	0	0	0	0	0	0	0	1	0	0	0	0	0	0	0	0	0	0	0	0	0	0	0	0	0	0	0	0	0	0	0	0	0	0	0	0	0	0	0	0.025	0.05	0
Dysgonomonas gadei nov 79.08%	0	0	0	0	0	0	0	0	0	0	0	0	0	0	0	0	0	0	0	0	0	0	0	0	0	0	0	0	0	0	1	0	0	0	0	0	0	0	0	0	0.025	0	0.05
Dysgonomonas oryzarvi	0	0	0	0	0	0	0	0	1	0	0	0	0	0	0	0	0	0	0	0	0	0	0	0	0	0	0	0	0	0	0	0	0	0	0	0	0	0	0	0	0.025	0.05	0
Porphyromonas asaccharolytica nov 97.74%	0	0	0	0	0	0	0	0	0	0	0	0	0	1	0	0	0	0	0	0	0	0	0	0	0	0	0	0	0	0	0	0	0	0	0	0	0	0	0	0	0.025	0.05	0
Porphyromonas gingivalis nov 96.13%	0	0	0	0	0	0	0	0	0	0	0	0	0	0	0	0	0	0	0	0	0	0	0	0	0	0	0	0	0	0	0	0	0	0	0	1	0	0	0	0	0.025	0	0.05
Porphyromonas somerae	0	0	0	0	0	0	0	0	0	0	0	0	0	1	0	0	0	0	0	0	0	0	0	0	0	0	0	0	0	0	0	0	0	0	0	0	0	0	0	0	0.025	0.05	0
Porphyromonas sp. oral taxon 275 nov 96.74%	0	0	0	0	0	0	0	0	0	0	0	0	0	0	0	0	0	0	0	0	0	0	0	0	0	0	0	0	0	0	0	0	0	0	0	1	0	0	0	0	0.025	0	0.05
Porphyromonas sp. oral taxon 279 nov 87.03%	0	0	0	0	1	0	0	0	0	0	0	0	0	0	0	0	0	0	0	0	0	0	0	0	0	0	0	0	0	0	0	0	0	0	0	0	0	0	0	0	0.025	0.05	0
Porphyromonas sp. oral taxon 279 nov 96.52%	0	0	0	0	0	0	0	0	0	0	0	0	0	0	0	0	0	0	0	0	0	0	0	0	0	0	0	0	0	0	1	0	0	0	0	0	0	0	0	0	0.025	0	0.05
Porphyromonas sp. oral taxon 279 nov 96.95%	0	0	0	0	0	0	0	0	0	0	0	0	0	0	0	0	0	0	0	0	0	0	0	0	0	0	0	0	0	0	0	0	0	0	0	1	0	0	0	0	0.025	0	0.05
Porphyromonas sp. oral taxon 279 nov 97.96%	0	0	0	0	0	0	0	0	0	0	0	0	0	0	0	0	0	0	0	0	0	0	0	0	0	0	0	0	0	0	0	0	0	0	0	1	0	0	0	0	0.025	0	0.05
Tannerella forsythia nov 94.87%	0	0	0	0	0	0	0	0	0	0	0	0	0	0	0	0	0	0	0	0	0	0	0	0	0	0	0	0	0	0	0	0	0	1	0	0	0	0	0	0	0.025	0	0.05
Tannerella sp. oral taxon 286 nov 95.33%	0	0	0	0	0	0	0	0	0	0	0	0	0	0	0	0	0	0	0	0	0	0	0	0	0	0	0	0	0	0	0	0	1	0	0	0	0	0	0	0	0.025	0	0.05
Tannerella sp. oral taxon 916 nov 83.13%	0	0	0	0	0	0	0	0	0	0	0	0	0	0	0	0	0	0	1	0	0	0	0	0	0	0	0	0	0	0	0	0	0	0	0	0	0	0	0	0	0.025	0.05	0
Alloprevotella sp. oral taxon 308 nov 94.74%	0	0	0	0	0	0	0	0	0	0	0	0	0	0	0	0	0	0	0	0	0	0	0	0	0	0	0	0	0	0	0	0	0	0	0	0	0	0	0	1	0.025	0	0.05
Alloprevotella sp. oral taxon 914 nov 95.10%	0	0	0	0	0	0	0	0	0	0	0	0	0	0	0	0	0	0	0	0	0	0	0	0	0	0	0	1	0	0	0	0	0	0	0	0	0	0	0	0	0.025	0	0.05
Prevotella bergensis	0	0	0	0	0	0	0	0	0	0	0	0	0	1	0	0	0	0	0	0	0	0	0	0	0	0	0	0	0	0	0	0	0	0	0	0	0	0	0	0	0.025	0.05	0
Prevotella bivia nov 92.91%	0	0	0	0	0	0	0	0	1	0	0	0	0	0	0	0	0	0	0	0	0	0	0	0	0	0	0	0	0	0	0	0	0	0	0	0	0	0	0	0	0.025	0.05	0
Prevotella buccae nov 89.07%	0	0	0	0	0	0	0	0	0	0	0	0	0	0	0	0	0	0	0	0	0	0	0	0	0	0	0	0	0	0	0	0	1	0	0	0	0	0	0	0	0.025	0	0.05
Prevotella buccae nov 89.47%	0	0	0	0	0	0	0	0	0	0	0	0	0	0	0	0	0	0	0	0	0	0	0	0	0	1	0	0	0	0	0	0	0	0	0	0	0	0	0	0	0.025	0	0.05
Prevotella buccalis	0	0	0	0	0	0	0	0	0	0	0	0	0	0	0	0	0	1	0	0	0	0	0	0	0	0	0	0	0	0	0	0	0	0	0	0	0	0	0	0	0.025	0.05	0
Prevotella copri	0	0	0	0	0	0	0	0	0	0	0	0	0	0	0	0	0	0	0	0	0	0	0	0	0	0	0	0	0	0	0	1	0	0	0	0	0	0	0	0	0.025	0	0.05
Prevotella denticola nov 90.87%	0	0	0	0	0	0	0	0	0	0	0	0	0	0	0	0	0	0	0	0	0	0	0	0	0	0	0	0	0	0	0	0	0	1	0	0	0	0	0	0	0.025	0	0.05
Prevotella enoeca	0	1	0	0	0	0	0	0	0	0	0	0	0	0	0	0	0	0	0	0	0	0	0	0	0	0	0	0	0	0	0	0	0	0	0	0	0	0	0	0	0.025	0.05	0
Prevotella enoeca nov 82.44%	0	0	0	0	0	0	0	0	0	0	0	0	0	0	0	0	0	1	0	0	0	0	0	0	0	0	0	0	0	0	0	0	0	0	0	0	0	0	0	0	0.025	0.05	0
Prevotella enoeca nov 95.51%	0	1	0	0	0	0	0	0	0	0	0	0	0	0	0	0	0	0	0	0	0	0	0	0	0	0	0	0	0	0	0	0	0	0	0	0	0	0	0	0	0.025	0.05	0
Prevotella enoeca nov 97.15%	0	0	0	0	0	0	0	0	0	0	0	0	0	0	0	0	0	1	0	0	0	0	0	0	0	0	0	0	0	0	0	0	0	0	0	0	0	0	0	0	0.025	0.05	0
Prevotella intermedia nov 96.56%	0	0	0	0	0	0	0	0	0	0	0	0	0	0	0	0	0	0	0	0	0	0	0	0	0	0	0	0	0	0	0	0	0	1	0	0	0	0	0	0	0.025	0	0.05
Prevotella loescheii nov 94.75%	0	0	0	0	0	0	0	0	0	0	0	0	0	0	0	0	0	0	0	0	0	0	0	0	0	0	0	0	0	0	0	0	1	0	0	0	0	0	0	0	0.025	0	0.05
Prevotella melaninogenica nov 97.16%	0	0	0	0	0	0	0	0	0	0	0	0	0	0	0	0	0	0	0	0	0	0	0	0	0	0	0	0	0	0	0	0	0	1	0	0	0	0	0	0	0.025	0	0.05
Prevotella melaninogenica nov 97.36%	0	0	0	0	0	0	0	0	0	0	0	0	0	0	0	0	0	0	0	0	0	0	0	0	0	0	0	0	0	0	0	0	0	0	0	0	0	0	0	1	0.025	0	0.05
Prevotella multisaccharivorax nov 95.93%	0	0	0	0	0	0	0	0	0	0	0	0	0	0	0	0	0	0	0	0	0	0	0	0	0	0	0	0	0	0	0	0	0	0	0	0	0	0	0	1	0.025	0	0.05
Prevotella multispecies spp10 2	1	0	0	0	0	0	0	0	0	0	0	0	0	0	0	0	0	0	0	0	0	0	0	0	0	0	0	0	0	0	0	0	0	0	0	0	0	0	0	0	0.025	0.05	0
Prevotella multispecies spp21 2	0	0	0	0	0	0	0	0	0	0	0	0	0	0	0	0	0	0	0	0	0	0	0	0	0	1	0	0	0	0	0	0	0	0	0	0	0	0	0	0	0.025	0	0.05
Prevotella multispecies sppn1 2 nov 93.52%	0	0	0	0	0	0	0	0	0	0	0	0	0	0	0	0	0	0	0	0	0	0	0	0	0	0	0	0	0	0	0	0	0	0	0	0	0	0	0	1	0.025	0	0.05
Prevotella nanceiensis nov 96.53%	0	0	0	0	0	0	0	0	0	0	0	1	0	0	0	0	0	0	0	0	0	0	0	0	0	0	0	0	0	0	0	0	0	0	0	0	0	0	0	0	0.025	0.05	0
Prevotella oris nov 96.94%	0	0	0	0	0	0	0	0	0	0	0	0	0	0	0	0	0	0	0	0	0	0	0	0	0	0	0	0	0	0	0	0	0	0	0	1	0	0	0	0	0.025	0	0.05
Prevotella pallens nov 95.55%	0	0	0	0	0	0	0	0	0	0	0	0	0	0	0	0	0	0	0	0	0	0	0	0	0	0	0	0	0	0	0	0	0	1	0	0	0	0	0	0	0.025	0	0.05
Prevotella salivae nov 96.33%	0	0	0	0	0	0	0	0	0	0	0	0	0	0	0	0	0	0	0	0	0	0	0	0	0	0	0	0	0	0	0	0	0	0	0	0	0	0	0	1	0.025	0	0.05
Prevotella sp. oral taxon 301	0	0	1	0	0	0	0	0	0	0	0	0	0	0	0	0	0	0	0	0	0	0	0	0	0	0	0	0	0	0	0	0	0	0	0	0	0	0	0	0	0.025	0.05	0
Prevotella sp. oral taxon 304 nov 97.14%	0	0	0	0	0	0	0	0	0	0	1	0	0	0	0	0	0	0	0	0	0	0	0	0	0	0	0	0	0	0	0	0	0	0	0	0	0	0	0	0	0.025	0.05	0
Prevotella sp. oral taxon 305 nov 93.52%	0	0	0	0	0	0	0	0	0	0	0	0	0	0	0	0	0	1	0	0	0	0	0	0	0	0	0	0	0	0	0	0	0	0	0	0	0	0	0	0	0.025	0.05	0
Prevotella sp. oral taxon 309 nov 86.37%	0	0	0	0	0	0	0	0	0	0	0	0	0	0	0	0	0	0	0	1	0	0	0	0	0	0	0	0	0	0	0	0	0	0	0	0	0	0	0	0	0.025	0.05	0
Prevotella sp. oral taxon 313 nov 97.36%	0	0	0	0	0	0	0	0	0	0	0	0	0	0	0	0	0	0	0	0	0	0	0	0	0	0	0	0	0	0	0	0	0	0	0	0	0	1	0	0	0.025	0	0.05
Prevotella sp. oral taxon 314 nov 97.15%	0	0	0	0	0	0	0	0	0	0	0	0	0	0	0	0	0	0	0	0	0	0	0	0	0	0	0	0	1	0	0	0	0	0	0	0	0	0	0	0	0.025	0	0.05
Prevotella sp. oral taxon 317 nov 97.97%	0	0	0	0	0	0	0	0	0	0	0	0	1	0	0	0	0	0	0	0	0	0	0	0	0	0	0	0	0	0	0	0	0	0	0	0	0	0	0	0	0.025	0.05	0
Prevotella sp. oral taxon 396	0	0	0	0	0	0	0	0	0	0	0	0	0	0	0	0	0	0	0	0	0	0	0	0	0	0	0	0	0	0	0	0	0	0	0	0	0	0	0	1	0.025	0	0.05
Prevotella sp. oral taxon 396 nov 84.95%	0	0	0	0	0	0	0	0	0	0	0	1	0	0	0	0	0	0	0	0	0	0	0	0	0	0	0	0	0	0	0	0	0	0	0	0	0	0	0	0	0.025	0.05	0
Prevotella sp. oral taxon 443 nov 97.96%	0	0	0	0	0	0	0	0	0	0	1	0	0	0	0	0	0	0	0	0	0	0	0	0	0	0	0	0	0	0	0	0	0	0	0	0	0	0	0	0	0.025	0.05	0
Prevotella sp. oral taxon 475 nov 97.96%	0	0	0	0	0	0	0	0	0	0	0	1	0	0	0	0	0	0	0	0	0	0	0	0	0	0	0	0	0	0	0	0	0	0	0	0	0	0	0	0	0.025	0.05	0
Prevotella sp. oral taxon 820	0	0	0	0	1	0	0	0	0	0	0	0	0	0	0	0	0	0	0	0	0	0	0	0	0	0	0	0	0	0	0	0	0	0	0	0	0	0	0	0	0.025	0.05	0
Prevotella sp. oral taxon 820 nov 90.71%	0	0	0	0	0	0	0	0	0	0	0	0	0	0	0	0	0	0	0	0	0	0	0	0	0	0	0	0	0	0	0	0	0	0	0	0	1	0	0	0	0.025	0	0.05
Prevotella sp. oral taxon 942 nov 97.15%	0	0	0	0	0	0	0	0	0	0	0	0	0	0	0	0	0	0	0	0	0	0	0	0	0	0	0	0	0	0	0	0	0	0	1	0	0	0	0	0	0.025	0	0.05
Bergeyella sp. Oral Taxon H70	0	0	0	0	0	0	0	0	0	0	0	0	0	0	0	0	0	0	0	0	0	0	0	0	0	0	0	0	0	0	0	1	0	0	0	0	0	0	0	0	0.025	0	0.05
Capnocytophaga sp. Oral Taxon A48	0	0	0	0	0	0	0	0	0	0	0	0	0	0	0	0	0	0	0	0	0	0	0	0	0	0	0	0	0	0	1	0	0	0	0	0	0	0	0	0	0.025	0	0.05
Bergeyella sp. oral taxon 422 nov 86.42%	0	0	0	0	0	0	0	0	0	0	0	0	0	0	0	0	0	0	0	0	0	0	0	0	0	0	0	0	0	0	0	1	0	0	0	0	0	0	0	0	0.025	0	0.05
Bergeyella sp. oral taxon 931 nov 80.72%	0	0	0	0	0	0	0	0	0	0	0	0	0	0	0	0	0	1	0	0	0	0	0	0	0	0	0	0	0	0	0	0	0	0	0	0	0	0	0	0	0.025	0.05	0
Bergeyella sp. oral taxon 931 nov 91.67%	0	0	0	0	0	0	0	0	0	0	0	0	0	0	0	0	0	0	0	0	0	0	0	0	0	0	0	1	0	0	0	0	0	0	0	0	0	0	0	0	0.025	0	0.05
Capnocytophaga gingivalis nov 96.43%	0	0	0	0	0	0	0	0	0	0	0	0	0	0	0	0	0	0	0	0	0	0	0	0	0	1	0	0	0	0	0	0	0	0	0	0	0	0	0	0	0.025	0	0.05
Capnocytophaga gingivalis nov 97.48%	0	0	0	0	0	0	0	0	0	0	0	0	0	0	0	0	0	0	0	0	0	0	0	0	0	0	0	0	0	0	1	0	0	0	0	0	0	0	0	0	0.025	0	0.05
Capnocytophaga granulosa nov 97.69%	0	0	0	0	0	0	0	0	0	0	0	0	0	0	0	0	0	0	0	0	0	0	0	0	0	0	0	0	0	0	0	0	0	0	0	0	0	1	0	0	0.025	0	0.05
Capnocytophaga granulosa nov 97.90%	0	0	0	0	0	0	0	0	0	0	0	0	0	0	0	0	0	0	0	0	0	0	0	0	0	0	0	0	0	0	0	0	0	0	0	0	0	0	1	0	0.025	0	0.05
Capnocytophaga haemolytica	0	0	0	0	0	0	0	0	0	0	0	0	0	0	0	0	0	0	1	0	0	0	0	0	0	0	0	0	0	0	0	0	0	0	0	0	0	0	0	0	0.025	0.05	0
Capnocytophaga haemolytica nov 97.92%	0	0	0	0	0	0	0	0	0	0	0	0	0	0	0	0	0	0	0	0	0	0	0	0	0	0	0	0	0	0	0	0	0	0	1	0	0	0	0	0	0.025	0	0.05
Capnocytophaga leadbetteri nov 95.77%	0	0	0	0	0	0	0	0	0	0	0	0	0	0	0	0	0	0	0	0	0	0	0	0	0	1	0	0	0	0	0	0	0	0	0	0	0	0	0	0	0.025	0	0.05
Capnocytophaga leadbetteri nov 96.86%	0	0	0	0	0	0	0	0	0	0	1	0	0	0	0	0	0	0	0	0	0	0	0	0	0	0	0	0	0	0	0	0	0	0	0	0	0	0	0	0	0.025	0.05	0
Capnocytophaga leadbetteri nov 97.88%	0	0	0	0	0	0	0	0	0	0	0	0	0	0	0	0	0	0	0	1	0	0	0	0	0	0	0	0	0	0	0	0	0	0	0	0	0	0	0	0	0.025	0.05	0
Capnocytophaga multispecies spp33 3	0	0	0	0	0	0	0	0	0	0	0	0	0	0	0	0	0	0	0	0	0	0	0	0	0	0	0	0	0	0	0	1	0	0	0	0	0	0	0	0	0.025	0	0.05
Capnocytophaga sp. oral taxon 336 nov 97.30%	0	0	0	0	0	0	0	0	0	0	0	0	0	0	0	0	0	0	0	0	0	0	0	0	0	1	0	0	0	0	0	0	0	0	0	0	0	0	0	0	0.025	0	0.05
Capnocytophaga sp. oral taxon 336 nov 97.68%	0	0	0	0	0	0	0	0	0	0	0	0	0	0	0	0	0	0	0	0	0	0	0	0	0	1	0	0	0	0	0	0	0	0	0	0	0	0	0	0	0.025	0	0.05
Capnocytophaga sp. oral taxon 336 nov 97.71%	0	0	0	0	0	0	0	0	0	0	0	0	0	0	0	0	0	0	0	0	0	0	0	0	0	1	0	0	0	0	0	0	0	0	0	0	0	0	0	0	0.025	0	0.05
Capnocytophaga sputigena nov 90.55%	0	0	0	0	0	0	0	0	0	0	0	0	0	0	0	0	0	0	0	0	0	0	0	0	0	0	0	0	0	0	1	0	0	0	0	0	0	0	0	0	0.025	0	0.05
Capnocytophaga sputigena nov 95.58%	0	1	0	0	0	0	0	0	0	0	0	0	0	0	0	0	0	0	0	0	0	0	0	0	0	0	0	0	0	0	0	0	0	0	0	0	0	0	0	0	0.025	0.05	0
Capnocytophaga sputigena nov 97.29%	0	0	0	0	0	0	0	0	0	0	0	0	0	0	0	0	0	0	0	0	0	0	0	0	1	0	0	0	0	0	0	0	0	0	0	0	0	0	0	0	0.025	0	0.05
Chryseobacterium hispalense	0	0	0	0	0	0	0	0	0	0	0	0	0	0	1	0	0	0	0	0	0	0	0	0	0	0	0	0	0	0	0	0	0	0	0	0	0	0	0	0	0.025	0.05	0
Flavitalea sp. oral taxon 320 nov 87.53%	0	0	0	1	0	0	0	0	0	0	0	0	0	0	0	0	0	0	0	0	0	0	0	0	0	0	0	0	0	0	0	0	0	0	0	0	0	0	0	0	0.025	0.05	0
Pedobacter sp. oral taxon 321 nov 78.53%	0	0	0	0	0	0	0	0	0	0	0	0	0	0	0	0	0	0	0	0	0	0	0	0	0	0	0	0	0	0	0	1	0	0	0	0	0	0	0	0	0.025	0	0.05
Pedobacter sp. oral taxon 321 nov 80.00%	0	0	0	0	0	0	0	0	0	0	0	0	0	0	0	0	0	0	0	0	0	1	0	0	0	0	0	0	0	0	0	0	0	0	0	0	0	0	0	0	0.025	0	0.05
Pedobacter sp. oral taxon 321 nov 87.30%	0	0	0	1	0	0	0	0	0	0	0	0	0	0	0	0	0	0	0	0	0	0	0	0	0	0	0	0	0	0	0	0	0	0	0	0	0	0	0	0	0.025	0.05	0
Caldilinea aerophila nov 81.74%	0	0	0	0	0	0	0	0	0	0	0	0	0	0	0	0	0	1	0	0	0	0	0	0	0	0	0	0	0	0	0	0	0	0	0	0	0	0	0	0	0.025	0.05	0
Sphaerobacter thermophilus nov 82.53%	0	0	0	0	0	0	0	0	0	0	0	0	1	0	0	0	0	0	0	0	0	0	0	0	0	0	0	0	0	0	0	0	0	0	0	0	0	0	0	0	0.025	0.05	0
Sphaerobacter thermophilus nov 84.42%	1	0	0	0	0	0	0	0	0	0	0	0	0	0	0	0	0	0	0	0	0	0	0	0	0	0	0	0	0	0	0	0	0	0	0	0	0	0	0	0	0.025	0.05	0
Deinococcus sp. Oral Taxon C45 nov 88.36%	0	0	0	0	0	1	0	0	0	0	0	0	0	0	0	0	0	0	0	0	0	0	0	0	0	0	0	0	0	0	0	0	0	0	0	0	0	0	0	0	0.025	0.05	0
Deinococcus sp. Oral Taxon C45 nov 89.74%	0	0	0	0	0	0	0	0	0	0	0	0	0	0	0	0	0	0	0	0	0	0	0	0	0	0	0	1	0	0	0	0	0	0	0	0	0	0	0	0	0.025	0	0.05
Bacillus anthracis nov 84.96%	0	0	0	0	0	0	0	0	0	0	0	0	0	0	0	0	0	0	0	0	0	0	0	0	0	0	0	0	0	0	1	0	0	0	0	0	0	0	0	0	0.025	0	0.05
Bacillus sp. Oral Taxon C03	0	0	0	0	0	0	0	1	0	0	0	0	0	0	0	0	0	0	0	0	0	0	0	0	0	0	0	0	0	0	0	0	0	0	0	0	0	0	0	0	0.025	0.05	0
Parageobacillus thermantarcticus	0	0	0	0	0	0	1	0	0	0	0	0	0	0	0	0	0	0	0	0	0	0	0	0	0	0	0	0	0	0	0	0	0	0	0	0	0	0	0	0	0.025	0.05	0
Gemella bergeri	0	1	0	0	0	0	0	0	0	0	0	0	0	0	0	0	0	0	0	0	0	0	0	0	0	0	0	0	0	0	0	0	0	0	0	0	0	0	0	0	0.025	0.05	0
Gemella haemolysans nov 95.42%	0	0	0	0	0	0	0	0	0	0	0	0	0	0	0	0	0	0	0	0	0	1	0	0	0	0	0	0	0	0	0	0	0	0	0	0	0	0	0	0	0.025	0	0.05
Gemella haemolysans nov 97.99%	0	0	0	0	0	0	0	0	0	0	0	0	0	0	0	0	0	0	0	0	1	0	0	0	0	0	0	0	0	0	0	0	0	0	0	0	0	0	0	0	0.025	0	0.05
Gemella sanguinis nov 93.61%	0	0	0	0	0	0	0	0	0	0	0	0	0	0	0	0	0	0	0	0	0	0	0	0	0	0	0	0	0	0	0	0	0	0	0	0	0	1	0	0	0.025	0	0.05
Paenibacillus glucanolyticus nov 77.71%	1	0	0	0	0	0	0	0	0	0	0	0	0	0	0	0	0	0	0	0	0	0	0	0	0	0	0	0	0	0	0	0	0	0	0	0	0	0	0	0	0.025	0.05	0
Aliicoccus persicus nov 81.28%	0	0	0	0	0	0	0	0	0	0	0	0	0	0	0	0	0	0	0	0	0	0	0	0	0	0	0	0	0	0	0	0	0	0	0	0	0	1	0	0	0.025	0	0.05
Staphylococcus auricularis	0	0	0	0	0	0	0	0	0	0	0	0	0	0	0	0	0	0	0	0	0	0	0	0	0	0	0	0	0	0	0	1	0	0	0	0	0	0	0	0	0.025	0	0.05
Staphylococcus caprae nov 77.89%	0	0	0	0	0	0	0	0	0	0	0	0	0	0	0	0	0	0	0	0	0	0	0	0	0	1	0	0	0	0	0	0	0	0	0	0	0	0	0	0	0.025	0	0.05
Staphylococcus warneri	1	0	0	0	0	0	0	0	0	0	0	0	0	0	0	0	0	0	0	0	0	0	0	0	0	0	0	0	0	0	0	0	0	0	0	0	0	0	0	0	0.025	0.05	0
Granulicatella adiacens nov 96.98%	0	0	0	0	0	0	0	0	0	0	0	0	0	0	0	0	0	0	0	0	0	0	1	0	0	0	0	0	0	0	0	0	0	0	0	0	0	0	0	0	0.025	0	0.05
Granulicatella elegans nov 96.81%	0	0	0	0	0	0	0	0	0	0	0	0	0	0	0	0	0	0	0	0	1	0	0	0	0	0	0	0	0	0	0	0	0	0	0	0	0	0	0	0	0.025	0	0.05
Enterococcus casseliflavus	0	0	0	0	0	0	0	0	0	0	0	0	0	1	0	0	0	0	0	0	0	0	0	0	0	0	0	0	0	0	0	0	0	0	0	0	0	0	0	0	0.025	0.05	0
Lactobacillus agilis	0	0	0	0	0	0	0	0	0	0	0	0	1	0	0	0	0	0	0	0	0	0	0	0	0	0	0	0	0	0	0	0	0	0	0	0	0	0	0	0	0.025	0.05	0
Lactobacillus gasseri	0	0	1	0	0	0	0	0	0	0	0	0	0	0	0	0	0	0	0	0	0	0	0	0	0	0	0	0	0	0	0	0	0	0	0	0	0	0	0	0	0.025	0.05	0
Lactobacillus gastricus	0	0	0	0	0	1	0	0	0	0	0	0	0	0	0	0	0	0	0	0	0	0	0	0	0	0	0	0	0	0	0	0	0	0	0	0	0	0	0	0	0.025	0.05	0
Lactobacillus multispecies spp41 2	0	0	0	0	0	0	0	0	1	0	0	0	0	0	0	0	0	0	0	0	0	0	0	0	0	0	0	0	0	0	0	0	0	0	0	0	0	0	0	0	0.025	0.05	0
Lactobacillus rhamnosus	0	0	0	0	0	1	0	0	0	0	0	0	0	0	0	0	0	0	0	0	0	0	0	0	0	0	0	0	0	0	0	0	0	0	0	0	0	0	0	0	0.025	0.05	0
Lactobacillus ultunensis	0	0	1	0	0	0	0	0	0	0	0	0	0	0	0	0	0	0	0	0	0	0	0	0	0	0	0	0	0	0	0	0	0	0	0	0	0	0	0	0	0.025	0.05	0
Leuconostoc citreum	0	0	0	0	0	0	0	0	0	1	0	0	0	0	0	0	0	0	0	0	0	0	0	0	0	0	0	0	0	0	0	0	0	0	0	0	0	0	0	0	0.025	0.05	0
Leuconostoc pseudomesenteroides Oral Taxon A60	0	0	0	0	0	0	0	0	0	1	0	0	0	0	0	0	0	0	0	0	0	0	0	0	0	0	0	0	0	0	0	0	0	0	0	0	0	0	0	0	0.025	0.05	0
Streptococcus australis nov 82.48%	0	0	0	0	0	0	0	0	0	0	0	0	0	0	0	0	0	0	0	0	0	0	0	0	0	0	0	0	0	0	0	0	0	0	0	1	0	0	0	0	0.025	0	0.05
Streptococcus australis nov 97.99%	0	0	0	0	0	0	0	0	0	0	0	0	0	0	0	0	0	0	0	0	0	0	0	1	0	0	0	0	0	0	0	0	0	0	0	0	0	0	0	0	0.025	0	0.05
Streptococcus cristatus nov 97.98%	0	0	0	0	0	0	0	0	0	0	0	0	0	0	0	0	0	0	0	0	0	0	0	0	0	0	0	0	0	0	0	0	0	0	0	1	0	0	0	0	0.025	0	0.05
Streptococcus dentisani nov 97.76%	0	0	0	0	0	0	0	0	0	0	0	0	0	0	0	0	0	0	0	0	0	0	0	0	0	0	0	0	0	0	0	0	0	0	0	1	0	0	0	0	0.025	0	0.05
Streptococcus mitis nov 96.76%	0	0	0	0	0	0	0	0	0	1	0	0	0	0	0	0	0	0	0	0	0	0	0	0	0	0	0	0	0	0	0	0	0	0	0	0	0	0	0	0	0.025	0.05	0
Streptococcus multispecies sppn1 2 nov 81.35%	0	0	0	0	0	0	0	0	0	0	0	0	0	0	0	0	0	0	0	0	0	0	0	0	0	0	0	0	0	0	0	0	0	0	0	1	0	0	0	0	0.025	0	0.05
Streptococcus parasanguinis II nov 97.59%	0	0	0	0	0	0	0	0	0	0	0	0	0	0	0	0	0	0	0	0	0	0	0	0	0	0	0	0	0	0	0	0	0	1	0	0	0	0	0	0	0.025	0	0.05
Streptococcus pyogenes	0	0	0	0	0	0	0	0	0	0	0	0	0	1	0	0	0	0	0	0	0	0	0	0	0	0	0	0	0	0	0	0	0	0	0	0	0	0	0	0	0.025	0.05	0
Streptococcus sp. Oral Taxon B59	0	0	0	0	0	0	0	0	0	0	0	0	0	0	0	0	0	1	0	0	0	0	0	0	0	0	0	0	0	0	0	0	0	0	0	0	0	0	0	0	0.025	0.05	0
Streptococcus sp. Oral Taxon C04	0	0	0	0	0	0	0	0	0	0	0	0	0	0	0	1	0	0	0	0	0	0	0	0	0	0	0	0	0	0	0	0	0	0	0	0	0	0	0	0	0.025	0.05	0
Streptococcus sp. oral taxon 066 nov 97.98%	0	0	0	0	0	0	0	0	0	0	0	0	0	0	0	0	0	0	0	0	0	0	0	0	0	0	1	0	0	0	0	0	0	0	0	0	0	0	0	0	0.025	0	0.05
Streptococcus sp. oral taxon 423 nov 94.37%	0	0	0	0	0	0	0	0	0	1	0	0	0	0	0	0	0	0	0	0	0	0	0	0	0	0	0	0	0	0	0	0	0	0	0	0	0	0	0	0	0.025	0.05	0
Streptococcus sp. str. M334	0	0	0	0	0	0	0	0	0	0	0	0	0	0	0	0	0	0	0	0	0	1	0	0	0	0	0	0	0	0	0	0	0	0	0	0	0	0	0	0	0.025	0	0.05
Clostridiales [F-1][G-1] sp. oral taxon 093 nov 82.26%	0	0	0	0	1	0	0	0	0	0	0	0	0	0	0	0	0	0	0	0	0	0	0	0	0	0	0	0	0	0	0	0	0	0	0	0	0	0	0	0	0.025	0.05	0
Clostridiales [F-1][G-1] sp. oral taxon 093 nov 97.62%	0	0	0	0	1	0	0	0	0	0	0	0	0	0	0	0	0	0	0	0	0	0	0	0	0	0	0	0	0	0	0	0	0	0	0	0	0	0	0	0	0.025	0.05	0
Clostridiales [F-1][G-2] sp. oral taxon 402	0	0	0	0	0	0	0	0	0	0	0	0	0	0	0	0	0	1	0	0	0	0	0	0	0	0	0	0	0	0	0	0	0	0	0	0	0	0	0	0	0.025	0.05	0
Clostridiales [G] sp. Oral Taxon C07 nov 79.50%	0	1	0	0	0	0	0	0	0	0	0	0	0	0	0	0	0	0	0	0	0	0	0	0	0	0	0	0	0	0	0	0	0	0	0	0	0	0	0	0	0.025	0.05	0
Pseudoramibacter alactolyticus	0	0	0	0	0	0	0	0	0	0	0	0	0	0	0	0	0	1	0	0	0	0	0	0	0	0	0	0	0	0	0	0	0	0	0	0	0	0	0	0	0.025	0.05	0
Eubacterium [XI][G] sp. Oral Taxon B60	0	0	1	0	0	0	0	0	0	0	0	0	0	0	0	0	0	0	0	0	0	0	0	0	0	0	0	0	0	0	0	0	0	0	0	0	0	0	0	0	0.025	0.05	0
Cellulosilyticum lentocellum nov 76.02%	0	0	0	0	1	0	0	0	0	0	0	0	0	0	0	0	0	0	0	0	0	0	0	0	0	0	0	0	0	0	0	0	0	0	0	0	0	0	0	0	0.025	0.05	0
Butyrivibrio sp. oral taxon 455	0	0	0	0	0	0	0	0	0	0	0	1	0	0	0	0	0	0	0	0	0	0	0	0	0	0	0	0	0	0	0	0	0	0	0	0	0	0	0	0	0.025	0.05	0
Catonella morbi nov 93.63%	0	0	0	0	0	0	0	0	0	0	0	1	0	0	0	0	0	0	0	0	0	0	0	0	0	0	0	0	0	0	0	0	0	0	0	0	0	0	0	0	0.025	0.05	0
Catonella morbi nov 96.69%	0	1	0	0	0	0	0	0	0	0	0	0	0	0	0	0	0	0	0	0	0	0	0	0	0	0	0	0	0	0	0	0	0	0	0	0	0	0	0	0	0.025	0.05	0
Catonella morbi nov 97.30%	0	0	0	0	0	0	0	0	0	0	1	0	0	0	0	0	0	0	0	0	0	0	0	0	0	0	0	0	0	0	0	0	0	0	0	0	0	0	0	0	0.025	0.05	0
Catonella morbi nov 97.92%	0	0	0	0	0	0	0	0	0	0	0	0	0	0	0	0	0	1	0	0	0	0	0	0	0	0	0	0	0	0	0	0	0	0	0	0	0	0	0	0	0.025	0.05	0
Lachnoanaerobaculum multispecies sppn1 2 nov 97.49%	0	0	0	0	0	0	0	0	0	0	0	0	0	0	1	0	0	0	0	0	0	0	0	0	0	0	0	0	0	0	0	0	0	0	0	0	0	0	0	0	0.025	0.05	0
Lachnoanaerobaculum orale nov 84.65%	0	0	0	0	1	0	0	0	0	0	0	0	0	0	0	0	0	0	0	0	0	0	0	0	0	0	0	0	0	0	0	0	0	0	0	0	0	0	0	0	0.025	0.05	0
Lachnoanaerobaculum orale nov 88.98%	0	0	0	0	0	0	0	0	0	0	0	0	0	0	0	0	0	1	0	0	0	0	0	0	0	0	0	0	0	0	0	0	0	0	0	0	0	0	0	0	0.025	0.05	0
Lachnoanaerobaculum sp. oral taxon 083	0	0	0	0	0	0	0	0	0	0	0	0	0	0	0	0	0	0	0	0	0	0	0	0	1	0	0	0	0	0	0	0	0	0	0	0	0	0	0	0	0.025	0	0.05
Lachnoanaerobaculum sp. oral taxon 089	0	0	0	0	0	0	0	0	0	0	0	0	0	0	0	0	0	0	0	0	0	0	0	0	0	0	0	0	0	0	0	0	0	0	0	0	0	0	1	0	0.025	0	0.05
Lachnoanaerobaculum sp. oral taxon 496	0	0	0	0	0	0	0	0	0	0	0	0	0	0	1	0	0	0	0	0	0	0	0	0	0	0	0	0	0	0	0	0	0	0	0	0	0	0	0	0	0.025	0.05	0
Lachnoanaerobaculum umeaense nov 94.03%	0	0	0	0	0	0	0	0	0	0	0	0	0	0	0	0	0	0	0	0	0	0	0	0	0	0	0	0	0	0	0	0	1	0	0	0	0	0	0	0	0.025	0	0.05
Lachnospiraceae [G-7] sp. oral taxon 086 nov 86.15%	0	0	0	0	0	0	0	0	0	0	0	0	0	0	0	0	0	0	0	0	0	0	0	0	0	0	0	0	0	0	0	0	0	0	1	0	0	0	0	0	0.025	0	0.05
Lachnospiraceae [G-8] sp. oral taxon 500 nov 97.50%	0	0	0	0	0	0	0	0	0	0	0	0	0	0	0	0	0	0	0	0	0	0	0	0	0	0	0	0	0	0	0	0	0	0	1	0	0	0	0	0	0.025	0	0.05
Oribacterium parvum nov 88.96%	0	0	0	0	0	0	0	0	0	0	0	0	0	0	0	0	0	1	0	0	0	0	0	0	0	0	0	0	0	0	0	0	0	0	0	0	0	0	0	0	0.025	0.05	0
Oribacterium sp. oral taxon 102 nov 78.80%	0	0	0	0	1	0	0	0	0	0	0	0	0	0	0	0	0	0	0	0	0	0	0	0	0	0	0	0	0	0	0	0	0	0	0	0	0	0	0	0	0.025	0.05	0
Oribacterium sp. oral taxon 102 nov 96.45%	0	0	0	0	0	0	0	0	0	0	0	0	0	0	0	0	0	1	0	0	0	0	0	0	0	0	0	0	0	0	0	0	0	0	0	0	0	0	0	0	0.025	0.05	0
Stomatobaculum sp. oral taxon 373	0	0	0	0	0	0	0	0	0	0	0	0	0	0	0	0	0	1	0	0	0	0	0	0	0	0	0	0	0	0	0	0	0	0	0	0	0	0	0	0	0.025	0.05	0
Stomatobaculum sp. oral taxon 910	0	0	0	0	0	0	0	0	0	0	0	0	0	0	0	0	0	0	0	0	0	0	0	0	0	0	0	0	0	0	0	1	0	0	0	0	0	0	0	0	0.025	0	0.05
Butyrivibrio crossotus nov 78.38%	0	0	0	0	1	0	0	0	0	0	0	0	0	0	0	0	0	0	0	0	0	0	0	0	0	0	0	0	0	0	0	0	0	0	0	0	0	0	0	0	0.025	0.05	0
Lacnoclostridium sp. str. L2 50 nov 79.14%	0	0	0	0	0	0	0	0	0	0	0	0	0	0	0	0	0	0	0	0	0	0	0	0	0	1	0	0	0	0	0	0	0	0	0	0	0	0	0	0	0.025	0	0.05
Desulfotomaculum ruminis nov 80.72%	0	0	0	0	0	0	0	0	0	0	0	0	0	0	0	0	0	0	0	0	0	0	0	0	0	1	0	0	0	0	0	0	0	0	0	0	0	0	0	0	0.025	0	0.05
Anaerococcus lactolyticus nov 92.28%	0	0	0	0	0	0	0	0	0	0	0	0	0	0	0	0	0	0	0	0	0	0	0	0	0	0	0	0	0	0	0	0	0	0	0	0	0	0	1	0	0.025	0	0.05
Anaerococcus prevotii	0	0	0	0	0	0	0	0	0	0	0	0	0	1	0	0	0	0	0	0	0	0	0	0	0	0	0	0	0	0	0	0	0	0	0	0	0	0	0	0	0.025	0.05	0
Parvimonas sp. oral taxon 110 nov 86.89%	0	0	0	0	0	0	0	0	0	0	0	0	0	0	0	0	1	0	0	0	0	0	0	0	0	0	0	0	0	0	0	0	0	0	0	0	0	0	0	0	0.025	0.05	0
Peptoniphilaceae [G-1] sp. oral taxon 113	0	0	0	0	0	0	0	0	0	0	1	0	0	0	0	0	0	0	0	0	0	0	0	0	0	0	0	0	0	0	0	0	0	0	0	0	0	0	0	0	0.025	0.05	0
Peptoniphilaceae [G-2] sp. oral taxon 790	0	0	0	0	0	0	0	0	0	0	0	0	0	0	0	0	0	1	0	0	0	0	0	0	0	0	0	0	0	0	0	0	0	0	0	0	0	0	0	0	0.025	0.05	0
Peptoniphilaceae [G-3] sp. oral taxon 929	0	0	0	0	0	0	0	0	0	0	0	0	0	0	0	0	0	1	0	0	0	0	0	0	0	0	0	0	0	0	0	0	0	0	0	0	0	0	0	0	0.025	0.05	0
Peptoniphilaceae [G-3] sp. oral taxon 929 nov 95.45%	0	0	0	0	0	0	0	0	0	0	0	0	0	0	0	0	0	1	0	0	0	0	0	0	0	0	0	0	0	0	0	0	0	0	0	0	0	0	0	0	0.025	0.05	0
Peptoniphilaceae [G-3] sp. oral taxon 929 nov 96.47%	0	0	0	0	0	0	0	0	0	0	0	0	0	0	0	0	0	1	0	0	0	0	0	0	0	0	0	0	0	0	0	0	0	0	0	0	0	0	0	0	0.025	0.05	0
Peptoclostridium tenue nov 78.65%	0	0	0	0	0	0	0	0	0	0	0	0	0	0	0	0	0	0	0	0	0	0	0	0	0	0	0	0	0	0	1	0	0	0	0	0	0	0	0	0	0.025	0	0.05
Peptostreptococcaceae [G] sp. Oral Taxon B17	0	0	0	0	0	0	0	0	0	0	0	0	0	0	0	0	0	1	0	0	0	0	0	0	0	0	0	0	0	0	0	0	0	0	0	0	0	0	0	0	0.025	0.05	0
Filifactor alocis nov 97.52%	0	1	0	0	0	0	0	0	0	0	0	0	0	0	0	0	0	0	0	0	0	0	0	0	0	0	0	0	0	0	0	0	0	0	0	0	0	0	0	0	0.025	0.05	0
Mogibacterium diversum nov 94.41%	0	0	0	0	1	0	0	0	0	0	0	0	0	0	0	0	0	0	0	0	0	0	0	0	0	0	0	0	0	0	0	0	0	0	0	0	0	0	0	0	0.025	0.05	0
Mogibacterium pumilum	0	0	0	0	0	0	0	0	0	0	0	1	0	0	0	0	0	0	0	0	0	0	0	0	0	0	0	0	0	0	0	0	0	0	0	0	0	0	0	0	0.025	0.05	0
Mogibacterium timidum nov 92.34%	0	0	0	0	0	0	0	0	0	0	0	0	0	0	0	0	0	0	0	0	0	0	0	0	0	0	0	0	0	0	0	0	0	0	0	0	0	1	0	0	0.025	0	0.05
Peptostreptococcaceae [XI][G-2] sp. oral taxon 091 nov 96.89%	0	0	0	0	0	0	0	0	0	0	1	0	0	0	0	0	0	0	0	0	0	0	0	0	0	0	0	0	0	0	0	0	0	0	0	0	0	0	0	0	0.025	0.05	0
Peptostreptococcaceae [XI][G-3] sp. oral taxon 495	0	0	0	0	0	0	0	0	0	0	0	0	0	0	0	0	0	1	0	0	0	0	0	0	0	0	0	0	0	0	0	0	0	0	0	0	0	0	0	0	0.025	0.05	0
Peptostreptococcaceae [XI][G-3] sp. oral taxon 950	0	0	0	0	0	0	0	0	0	0	0	0	0	0	0	0	0	1	0	0	0	0	0	0	0	0	0	0	0	0	0	0	0	0	0	0	0	0	0	0	0.025	0.05	0
Peptostreptococcaceae [XI][G-4] sp. oral taxon 369 nov 89.53%	0	0	0	0	0	0	0	0	0	0	0	0	0	0	0	0	0	1	0	0	0	0	0	0	0	0	0	0	0	0	0	0	0	0	0	0	0	0	0	0	0.025	0.05	0
Peptostreptococcaceae [XI][G-6] [Eubacterium] minutum	0	0	0	0	0	0	0	0	0	0	0	0	0	0	0	0	0	0	0	0	0	0	0	0	0	0	0	0	0	0	0	0	0	1	0	0	0	0	0	0	0.025	0	0.05
Peptostreptococcaceae [XI][G-8] sp. oral taxon 382	0	0	0	0	0	0	0	0	0	0	0	0	0	0	0	0	0	0	0	0	0	0	0	0	0	0	0	0	0	0	0	0	0	0	1	0	0	0	0	0	0.025	0	0.05
Peptostreptococcus anaerobius	0	0	0	0	1	0	0	0	0	0	0	0	0	0	0	0	0	0	0	0	0	0	0	0	0	0	0	0	0	0	0	0	0	0	0	0	0	0	0	0	0.025	0.05	0
Peptostreptococcus anaerobius nov 81.19%	0	0	0	0	1	0	0	0	0	0	0	0	0	0	0	0	0	0	0	0	0	0	0	0	0	0	0	0	0	0	0	0	0	0	0	0	0	0	0	0	0.025	0.05	0
Peptostreptococcus anaerobius nov 84.27%	0	0	0	0	0	0	0	0	0	0	0	0	0	0	0	0	0	0	0	0	0	0	0	0	0	0	0	0	0	0	0	0	1	0	0	0	0	0	0	0	0.025	0	0.05
Peptostreptococcus anaerobius nov 84.95%	0	0	0	0	0	0	0	0	0	0	0	0	0	0	0	0	0	0	0	0	0	0	0	0	0	0	0	0	0	0	0	0	0	0	0	1	0	0	0	0	0.025	0	0.05
multigenus multispecies sppn1 2 nov 86.12%	0	0	0	0	0	0	0	0	0	0	0	0	0	0	0	0	0	1	0	0	0	0	0	0	0	0	0	0	0	0	0	0	0	0	0	0	0	0	0	0	0.025	0.05	0
Acetivibrio cellulolyticus nov 77.87%	0	0	0	0	1	0	0	0	0	0	0	0	0	0	0	0	0	0	0	0	0	0	0	0	0	0	0	0	0	0	0	0	0	0	0	0	0	0	0	0	0.025	0.05	0
Bacteroides capillosus nov 79.88%	0	0	0	0	0	0	0	0	0	0	0	0	0	0	0	0	0	0	0	0	0	0	0	0	0	1	0	0	0	0	0	0	0	0	0	0	0	0	0	0	0.025	0	0.05
Ruminoclostridium alkalicellum nov 77.98%	0	0	0	0	0	0	0	0	0	0	0	0	0	0	0	0	0	0	0	0	0	0	0	0	0	0	0	0	0	0	0	0	0	0	0	0	0	1	0	0	0.025	0	0.05
Ruminococcaceae [G-1] sp. oral taxon 075	0	0	0	0	0	0	0	0	0	0	0	0	0	0	0	0	0	0	0	0	0	0	0	0	0	1	0	0	0	0	0	0	0	0	0	0	0	0	0	0	0.025	0	0.05
Ruminococcaceae [G-2] sp. oral taxon 085 nov 83.85%	0	0	0	0	0	0	0	0	0	0	0	0	0	0	0	0	0	0	0	0	0	0	0	0	0	0	0	0	0	0	0	0	1	0	0	0	0	0	0	0	0.025	0	0.05
Ruminococcaceae [G-3] sp. oral taxon 366 nov 88.82%	0	0	0	0	0	0	0	0	0	0	0	0	1	0	0	0	0	0	0	0	0	0	0	0	0	0	0	0	0	0	0	0	0	0	0	0	0	0	0	0	0.025	0.05	0
Syntrophomonas bryantii nov 80.15%	0	0	0	0	0	0	0	0	0	0	0	0	0	0	0	0	0	0	0	0	0	0	0	0	0	0	0	0	0	0	0	0	0	0	0	0	0	0	1	0	0.025	0	0.05
Selenomonas sp. Oral Taxon G55	0	1	0	0	0	0	0	0	0	0	0	0	0	0	0	0	0	0	0	0	0	0	0	0	0	0	0	0	0	0	0	0	0	0	0	0	0	0	0	0	0.025	0.05	0
Tissierella coagulans	0	0	0	0	0	0	0	0	1	0	0	0	0	0	0	0	0	0	0	0	0	0	0	0	0	0	0	0	0	0	0	0	0	0	0	0	0	0	0	0	0.025	0.05	0
Allobaculum stercoricanis nov 79.16%	0	0	0	0	0	0	0	0	0	0	0	0	0	0	0	0	0	0	0	0	0	0	0	0	0	0	0	0	0	0	0	0	1	0	0	0	0	0	0	0	0.025	0	0.05
Firmicutes [G] sp. Oral Taxon C68 nov 84.05%	0	0	0	0	0	0	0	0	0	0	0	0	0	0	0	0	0	0	0	0	0	0	0	0	0	0	0	0	0	0	0	0	0	0	0	0	0	0	1	0	0.025	0	0.05
Firmicutes [G] sp. Oral Taxon C68 nov 85.95%	0	0	0	0	0	0	0	0	0	0	0	0	0	0	0	0	0	0	1	0	0	0	0	0	0	0	0	0	0	0	0	0	0	0	0	0	0	0	0	0	0.025	0.05	0
Firmicutes [G] sp. Oral Taxon C68 nov 86.48%	0	0	0	0	0	0	0	0	0	0	0	0	0	0	0	0	0	0	0	0	0	0	0	0	0	1	0	0	0	0	0	0	0	0	0	0	0	0	0	0	0.025	0	0.05
Mollicutes [G-1] sp. oral taxon 504	0	0	0	0	1	0	0	0	0	0	0	0	0	0	0	0	0	0	0	0	0	0	0	0	0	0	0	0	0	0	0	0	0	0	0	0	0	0	0	0	0.025	0.05	0
Mollicutes [G-1] sp. oral taxon 504 nov 97.93%	0	0	0	0	1	0	0	0	0	0	0	0	0	0	0	0	0	0	0	0	0	0	0	0	0	0	0	0	0	0	0	0	0	0	0	0	0	0	0	0	0.025	0.05	0
Mycoplasma buccale	0	0	0	0	0	0	0	0	0	0	0	0	0	1	0	0	0	0	0	0	0	0	0	0	0	0	0	0	0	0	0	0	0	0	0	0	0	0	0	0	0.025	0.05	0
Anaeroglobus geminatus	0	0	0	0	0	0	0	0	0	0	0	0	0	0	0	0	1	0	0	0	0	0	0	0	0	0	0	0	0	0	0	0	0	0	0	0	0	0	0	0	0.025	0.05	0
Mitsuokella sp. oral taxon 521	0	0	0	0	0	0	0	0	0	0	0	0	0	0	0	0	0	0	0	0	0	0	0	0	0	0	0	0	0	0	0	0	0	0	0	0	0	1	0	0	0.025	0	0.05
Selenomonas dianae nov 96.67%	0	0	0	0	0	0	0	0	0	0	1	0	0	0	0	0	0	0	0	0	0	0	0	0	0	0	0	0	0	0	0	0	0	0	0	0	0	0	0	0	0.025	0.05	0
Selenomonas flueggei nov 90.72%	0	0	0	0	0	0	0	0	0	0	0	0	0	0	0	0	0	0	0	0	0	0	0	0	0	1	0	0	0	0	0	0	0	0	0	0	0	0	0	0	0.025	0	0.05
Selenomonas multispecies spp13 2	0	1	0	0	0	0	0	0	0	0	0	0	0	0	0	0	0	0	0	0	0	0	0	0	0	0	0	0	0	0	0	0	0	0	0	0	0	0	0	0	0.025	0.05	0
Selenomonas multispecies spp36 2	0	0	0	0	1	0	0	0	0	0	0	0	0	0	0	0	0	0	0	0	0	0	0	0	0	0	0	0	0	0	0	0	0	0	0	0	0	0	0	0	0.025	0.05	0
Selenomonas sp. oral taxon 126 nov 97.85%	0	0	0	0	0	0	0	0	0	0	0	0	0	0	0	0	0	0	1	0	0	0	0	0	0	0	0	0	0	0	0	0	0	0	0	0	0	0	0	0	0.025	0.05	0
Selenomonas sp. oral taxon 149	0	0	0	0	0	0	0	0	0	0	1	0	0	0	0	0	0	0	0	0	0	0	0	0	0	0	0	0	0	0	0	0	0	0	0	0	0	0	0	0	0.025	0.05	0
Selenomonas sp. oral taxon 388	0	0	0	0	1	0	0	0	0	0	0	0	0	0	0	0	0	0	0	0	0	0	0	0	0	0	0	0	0	0	0	0	0	0	0	0	0	0	0	0	0.025	0.05	0
Selenomonas sp. oral taxon 479 nov 97.83%	0	0	0	0	0	0	0	0	0	0	0	0	0	0	0	0	0	0	0	0	0	0	0	0	0	0	0	0	0	0	0	0	0	0	1	0	0	0	0	0	0.025	0	0.05
Selenomonas sp. oral taxon 892 nov 97.46%	0	0	0	0	0	0	0	0	0	0	0	0	1	0	0	0	0	0	0	0	0	0	0	0	0	0	0	0	0	0	0	0	0	0	0	0	0	0	0	0	0.025	0.05	0
Veillonella denticariosi nov 96.86%	0	0	0	0	0	0	0	0	0	0	0	0	0	0	0	0	0	0	0	0	0	0	0	0	0	0	1	0	0	0	0	0	0	0	0	0	0	0	0	0	0.025	0	0.05
Veillonella parvula group nov 96.86%	0	0	0	0	0	0	0	0	0	0	0	0	0	0	0	0	0	0	0	0	0	0	0	1	0	0	0	0	0	0	0	0	0	0	0	0	0	0	0	0	0.025	0	0.05
Veillonella sp. oral taxon 780 nov 97.44%	0	0	0	0	0	0	0	0	0	0	0	0	0	0	0	0	0	0	0	0	0	0	0	0	0	0	0	0	0	0	0	0	0	0	1	0	0	0	0	0	0.025	0	0.05
Veillonella sp. oral taxon 780 nov 97.64%	0	0	0	0	0	0	0	0	0	0	0	0	0	0	0	0	0	0	0	0	0	0	0	0	0	0	0	1	0	0	0	0	0	0	0	0	0	0	0	0	0.025	0	0.05
Veillonella sp. oral taxon 917 nov 90.93%	0	0	0	0	0	0	0	0	0	0	0	0	0	0	0	0	0	0	0	0	1	0	0	0	0	0	0	0	0	0	0	0	0	0	0	0	0	0	0	0	0.025	0	0.05
Veillonellaceae [G-1] sp. oral taxon 132	0	0	0	0	0	0	0	0	0	0	0	0	0	0	0	0	0	0	0	0	0	0	0	0	0	0	0	0	0	0	0	0	0	0	1	0	0	0	0	0	0.025	0	0.05
Veillonellaceae [G-1] sp. oral taxon 148	0	0	0	0	0	0	0	0	0	0	0	0	0	0	0	0	1	0	0	0	0	0	0	0	0	0	0	0	0	0	0	0	0	0	0	0	0	0	0	0	0.025	0.05	0
Veillonellaceae [G-1] sp. oral taxon 150	0	0	0	0	0	0	0	0	0	0	0	0	0	0	1	0	0	0	0	0	0	0	0	0	0	0	0	0	0	0	0	0	0	0	0	0	0	0	0	0	0.025	0.05	0
Veillonellaceae [G-1] sp. oral taxon 155	0	0	0	0	0	0	0	0	0	0	0	0	0	0	0	0	0	0	0	0	0	0	0	0	0	0	0	0	0	0	0	0	1	0	0	0	0	0	0	0	0.025	0	0.05
Dialister propionicifaciens	0	0	0	0	0	0	0	0	0	0	0	0	0	1	0	0	0	0	0	0	0	0	0	0	0	0	0	0	0	0	0	0	0	0	0	0	0	0	0	0	0.025	0.05	0
Anaerococcus vaginalis	0	0	0	0	0	0	0	0	0	0	0	1	0	0	0	0	0	0	0	0	0	0	0	0	0	0	0	0	0	0	0	0	0	0	0	0	0	0	0	0	0.025	0.05	0
Peptoniphilus grossensis	0	0	0	0	0	0	0	0	0	0	0	0	0	1	0	0	0	0	0	0	0	0	0	0	0	0	0	0	0	0	0	0	0	0	0	0	0	0	0	0	0.025	0.05	0
Cetobacterium ceti nov 82.83%	0	0	0	0	0	0	0	0	0	0	0	0	0	0	0	0	0	0	0	0	0	0	0	0	0	0	0	0	0	0	0	0	0	0	0	0	0	0	0	1	0.025	0	0.05
Fusobacterium multispecies spp19 2	0	0	0	0	0	0	0	0	0	0	0	0	0	0	0	0	0	0	0	0	0	0	0	0	0	0	0	0	0	0	0	0	1	0	0	0	0	0	0	0	0.025	0	0.05
Fusobacterium multispecies spp26 2	0	0	0	0	0	0	0	0	0	0	0	0	0	0	0	0	0	0	1	0	0	0	0	0	0	0	0	0	0	0	0	0	0	0	0	0	0	0	0	0	0.025	0.05	0
Fusobacterium multispecies spp8 2	0	0	0	0	0	0	0	0	0	0	0	0	0	0	0	0	0	0	0	0	0	0	0	0	0	0	0	0	0	0	0	0	0	0	1	0	0	0	0	0	0.025	0	0.05
Fusobacterium necrophorum	0	1	0	0	0	0	0	0	0	0	0	0	0	0	0	0	0	0	0	0	0	0	0	0	0	0	0	0	0	0	0	0	0	0	0	0	0	0	0	0	0.025	0.05	0
Fusobacterium necrophorum nov 91.72%	0	1	0	0	0	0	0	0	0	0	0	0	0	0	0	0	0	0	0	0	0	0	0	0	0	0	0	0	0	0	0	0	0	0	0	0	0	0	0	0	0.025	0.05	0
Fusobacterium nucleatum subsp. animalis nov 97.21%	0	0	0	0	0	0	0	0	0	0	0	0	0	0	0	0	0	0	0	0	0	0	0	0	0	0	0	0	0	0	0	0	0	1	0	0	0	0	0	0	0.025	0	0.05
Fusobacterium nucleatum subsp. polymorphum nov 96.48%	0	0	0	0	0	0	0	0	0	0	0	0	0	0	0	0	0	0	0	0	0	0	0	0	0	0	0	0	0	0	0	0	1	0	0	0	0	0	0	0	0.025	0	0.05
Fusobacterium nucleatum subsp. polymorphum nov 96.91%	0	0	0	0	0	0	0	0	0	0	0	1	0	0	0	0	0	0	0	0	0	0	0	0	0	0	0	0	0	0	0	0	0	0	0	0	0	0	0	0	0.025	0.05	0
Fusobacterium nucleatum subsp. polymorphum nov 97.36%	0	0	0	0	0	0	0	0	0	0	0	0	0	0	0	0	0	0	0	0	0	0	0	0	0	0	0	0	0	0	0	0	0	0	1	0	0	0	0	0	0.025	0	0.05
Fusobacterium nucleatum subsp. vincentii nov 95.22%	0	0	0	0	0	0	0	0	0	0	1	0	0	0	0	0	0	0	0	0	0	0	0	0	0	0	0	0	0	0	0	0	0	0	0	0	0	0	0	0	0.025	0.05	0
Fusobacterium nucleatum subsp. vincentii nov 96.15%	0	1	0	0	0	0	0	0	0	0	0	0	0	0	0	0	0	0	0	0	0	0	0	0	0	0	0	0	0	0	0	0	0	0	0	0	0	0	0	0	0.025	0.05	0
Fusobacterium nucleatum subsp. vincentii nov 97.85%	0	0	0	0	0	0	0	0	0	0	0	0	0	0	0	0	0	0	0	0	0	0	0	0	0	0	0	0	0	0	0	1	0	0	0	0	0	0	0	0	0.025	0	0.05
Fusobacterium periodonticum nov 91.43%	0	0	0	0	0	0	0	0	0	0	0	0	0	0	0	0	0	0	0	0	0	0	0	0	0	0	0	0	0	0	0	0	0	0	0	1	0	0	0	0	0.025	0	0.05
Fusobacterium periodonticum nov 96.26%	0	0	0	0	0	0	0	0	0	0	0	0	0	0	0	0	0	0	0	0	0	0	0	0	0	0	0	0	0	0	0	0	0	0	0	1	0	0	0	0	0.025	0	0.05
Fusobacterium simiae	0	0	0	0	0	0	0	0	0	0	0	0	0	0	0	0	0	1	0	0	0	0	0	0	0	0	0	0	0	0	0	0	0	0	0	0	0	0	0	0	0.025	0.05	0
Fusobacterium sp. oral taxon 203 nov 96.54%	0	0	0	0	0	0	0	0	0	0	0	0	0	0	0	0	0	0	0	0	0	0	0	0	0	0	0	0	0	0	0	0	0	0	1	0	0	0	0	0	0.025	0	0.05
Propionigenium modestum nov 87.31%	0	1	0	0	0	0	0	0	0	0	0	0	0	0	0	0	0	0	0	0	0	0	0	0	0	0	0	0	0	0	0	0	0	0	0	0	0	0	0	0	0.025	0.05	0
Leptotrichia goodfellowii nov 91.70%	0	0	0	0	0	0	0	0	0	0	0	0	0	0	0	0	0	0	0	0	0	0	0	0	0	0	0	1	0	0	0	0	0	0	0	0	0	0	0	0	0.025	0	0.05
Leptotrichia goodfellowii nov 92.32%	0	0	0	0	0	0	0	0	0	0	0	0	0	0	0	0	0	0	0	0	0	1	0	0	0	0	0	0	0	0	0	0	0	0	0	0	0	0	0	0	0.025	0	0.05
Leptotrichia hofstadii nov 97.42%	0	0	0	0	0	0	0	0	0	0	0	0	0	0	0	0	0	0	0	0	0	0	0	0	0	1	0	0	0	0	0	0	0	0	0	0	0	0	0	0	0.025	0	0.05
Leptotrichia hongkongensis nov 84.32%	0	0	0	0	0	0	0	0	0	0	0	0	0	0	0	0	0	0	0	0	0	0	0	0	0	0	0	0	0	0	0	0	1	0	0	0	0	0	0	0	0.025	0	0.05
Leptotrichia multispecies spp16 2	0	0	0	0	0	0	0	0	0	0	0	0	0	0	0	0	0	0	0	0	0	0	0	0	0	0	0	0	0	0	0	0	1	0	0	0	0	0	0	0	0.025	0	0.05
Leptotrichia multispecies spp23 2	0	0	0	0	0	0	0	0	0	0	0	0	0	0	0	0	0	1	0	0	0	0	0	0	0	0	0	0	0	0	0	0	0	0	0	0	0	0	0	0	0.025	0.05	0
Leptotrichia multispecies spp35 2	0	0	0	0	0	0	0	0	0	0	0	0	0	0	0	0	0	0	0	0	0	0	0	0	0	0	0	0	0	0	0	0	1	0	0	0	0	0	0	0	0.025	0	0.05
Leptotrichia multispecies sppn1 2 nov 95.47%	0	1	0	0	0	0	0	0	0	0	0	0	0	0	0	0	0	0	0	0	0	0	0	0	0	0	0	0	0	0	0	0	0	0	0	0	0	0	0	0	0.025	0.05	0
Leptotrichia sp. oral taxon 212 nov 93.33%	0	0	0	0	0	0	0	0	0	0	0	0	0	0	0	0	0	0	0	0	0	0	0	0	0	0	0	0	0	0	0	0	1	0	0	0	0	0	0	0	0.025	0	0.05
Leptotrichia sp. oral taxon 212 nov 95.91%	0	0	0	0	0	0	0	0	0	0	0	0	0	0	0	0	0	0	0	0	0	0	0	0	0	1	0	0	0	0	0	0	0	0	0	0	0	0	0	0	0.025	0	0.05
Leptotrichia sp. oral taxon 215 nov 92.27%	0	0	0	0	0	0	0	0	0	0	0	0	0	0	0	0	0	0	0	0	0	0	0	0	0	0	0	0	0	0	0	0	0	0	0	0	0	0	0	1	0.025	0	0.05
Leptotrichia sp. oral taxon 215 nov 95.46%	0	0	0	0	0	0	0	0	0	0	1	0	0	0	0	0	0	0	0	0	0	0	0	0	0	0	0	0	0	0	0	0	0	0	0	0	0	0	0	0	0.025	0.05	0
Leptotrichia sp. oral taxon 215 nov 95.71%	0	0	0	0	0	0	0	0	0	0	0	0	0	0	0	0	0	0	0	1	0	0	0	0	0	0	0	0	0	0	0	0	0	0	0	0	0	0	0	0	0.025	0.05	0
Leptotrichia sp. oral taxon 215 nov 95.88%	0	0	0	0	0	0	0	0	0	0	0	0	0	0	0	0	0	0	0	0	0	0	0	0	0	0	0	0	0	0	0	0	0	0	0	0	1	0	0	0	0.025	0	0.05
Leptotrichia sp. oral taxon 215 nov 95.91%	0	0	0	0	0	0	0	0	0	0	0	0	0	0	0	0	0	0	0	0	0	0	0	0	0	0	0	0	0	0	0	0	0	0	0	1	0	0	0	0	0.025	0	0.05
Leptotrichia sp. oral taxon 215 nov 97.84%	0	0	0	0	0	0	0	0	0	0	0	1	0	0	0	0	0	0	0	0	0	0	0	0	0	0	0	0	0	0	0	0	0	0	0	0	0	0	0	0	0.025	0.05	0
Leptotrichia sp. oral taxon 221 nov 83.95%	0	0	0	0	0	0	0	0	0	0	0	0	0	0	0	0	0	0	0	0	0	0	0	0	0	0	0	0	0	0	0	0	0	0	0	1	0	0	0	0	0.025	0	0.05
Leptotrichia sp. oral taxon 221 nov 92.78%	0	0	0	0	0	0	0	0	0	0	0	0	0	0	0	0	0	0	0	0	0	0	0	0	0	0	1	0	0	0	0	0	0	0	0	0	0	0	0	0	0.025	0	0.05
Leptotrichia sp. oral taxon 223 nov 91.38%	0	0	0	0	0	0	0	0	0	0	0	0	0	0	0	0	0	0	0	0	0	0	0	0	0	0	0	0	0	0	0	0	1	0	0	0	0	0	0	0	0.025	0	0.05
Leptotrichia sp. oral taxon 225 nov 95.90%	0	0	0	0	0	0	0	0	0	0	1	0	0	0	0	0	0	0	0	0	0	0	0	0	0	0	0	0	0	0	0	0	0	0	0	0	0	0	0	0	0.025	0.05	0
Leptotrichia sp. oral taxon 225 nov 97.82%	0	0	0	0	0	0	0	0	0	0	0	0	0	0	0	0	0	0	0	0	0	0	0	0	0	0	0	0	0	0	0	0	1	0	0	0	0	0	0	0	0.025	0	0.05
Leptotrichia sp. oral taxon 392 nov 95.30%	0	0	0	0	0	0	0	0	0	0	0	0	0	0	0	0	0	0	0	0	0	0	0	0	0	0	0	0	0	0	0	0	1	0	0	0	0	0	0	0	0.025	0	0.05
Leptotrichia sp. oral taxon 392 nov 96.57%	0	0	0	0	0	0	0	0	0	0	0	0	0	0	0	0	0	0	0	0	0	0	0	0	0	0	0	0	0	0	0	0	1	0	0	0	0	0	0	0	0.025	0	0.05
Leptotrichia sp. oral taxon 392 nov 97.84%	0	0	0	0	0	0	0	0	0	0	1	0	0	0	0	0	0	0	0	0	0	0	0	0	0	0	0	0	0	0	0	0	0	0	0	0	0	0	0	0	0.025	0.05	0
Leptotrichia sp. oral taxon 463 nov 97.84%	0	0	0	0	0	0	0	0	0	0	1	0	0	0	0	0	0	0	0	0	0	0	0	0	0	0	0	0	0	0	0	0	0	0	0	0	0	0	0	0	0.025	0.05	0
Leptotrichia sp. oral taxon 847	0	0	0	0	0	0	0	0	0	0	0	0	0	0	0	0	0	0	0	0	0	0	0	0	0	0	0	0	0	0	0	0	0	0	0	1	0	0	0	0	0.025	0	0.05
Leptotrichia sp. oral taxon 879	0	0	0	0	0	0	0	0	0	0	0	0	0	0	0	0	0	0	0	0	0	0	0	0	0	0	0	0	0	0	0	0	0	0	0	0	0	1	0	0	0.025	0	0.05
Leptotrichia sp. oral taxon 879 nov 95.24%	0	0	0	0	0	0	0	0	0	0	1	0	0	0	0	0	0	0	0	0	0	0	0	0	0	0	0	0	0	0	0	0	0	0	0	0	0	0	0	0	0.025	0.05	0
Sneathia amnii [NVP]	0	0	0	0	0	0	0	0	0	0	0	0	0	0	0	0	0	1	0	0	0	0	0	0	0	0	0	0	0	0	0	0	0	0	0	0	0	0	0	0	0.025	0.05	0
GN02 [G-1] sp. oral taxon 872 nov 97.41%	0	0	0	0	0	0	0	0	0	0	0	0	0	0	0	0	0	0	0	0	0	0	0	0	0	0	0	0	0	0	0	0	1	0	0	0	0	0	0	0	0.025	0	0.05
Methylobacterium sp. Oral Taxon B84	0	1	0	0	0	0	0	0	0	0	0	0	0	0	0	0	0	0	0	0	0	0	0	0	0	0	0	0	0	0	0	0	0	0	0	0	0	0	0	0	0.025	0.05	0
Alphaproteobacteria [G] sp. Oral Taxon A28 nov 84.48%	0	0	0	0	0	0	0	0	1	0	0	0	0	0	0	0	0	0	0	0	0	0	0	0	0	0	0	0	0	0	0	0	0	0	0	0	0	0	0	0	0.025	0.05	0
Brevundimonas diminuta	0	0	0	0	0	0	0	0	0	0	0	0	0	0	0	0	0	0	0	0	0	0	0	0	0	0	0	0	0	0	0	1	0	0	0	0	0	0	0	0	0.025	0	0.05
Brevundimonas diminuta nov 84.53%	0	0	0	0	0	0	0	0	0	0	0	1	0	0	0	0	0	0	0	0	0	0	0	0	0	0	0	0	0	0	0	0	0	0	0	0	0	0	0	0	0.025	0.05	0
Caulobacter sp. Oral Taxon C49	0	0	0	0	0	0	0	0	0	0	0	0	0	0	0	0	0	0	0	0	0	0	0	0	0	0	0	0	0	0	0	1	0	0	0	0	0	0	0	0	0.025	0	0.05
Caulobacter sp. oral taxon 002 nov 83.60%	0	0	1	0	0	0	0	0	0	0	0	0	0	0	0	0	0	0	0	0	0	0	0	0	0	0	0	0	0	0	0	0	0	0	0	0	0	0	0	0	0.025	0.05	0
Caulobacter sp. oral taxon 002 nov 84.62%	0	0	0	0	0	0	0	0	0	0	0	0	0	0	0	0	0	0	0	0	0	0	0	0	0	0	0	0	0	0	0	1	0	0	0	0	0	0	0	0	0.025	0	0.05
Bosea vestrisii nov 89.46%	0	0	0	1	0	0	0	0	0	0	0	0	0	0	0	0	0	0	0	0	0	0	0	0	0	0	0	0	0	0	0	0	0	0	0	0	0	0	0	0	0.025	0.05	0
Bradyrhizobium elkanii	0	0	0	0	0	0	0	1	0	0	0	0	0	0	0	0	0	0	0	0	0	0	0	0	0	0	0	0	0	0	0	0	0	0	0	0	0	0	0	0	0.025	0.05	0
Paracoccus aminovorans	0	0	0	0	0	0	0	0	0	0	0	0	0	0	0	0	0	0	0	0	0	0	0	0	0	0	0	0	0	0	0	1	0	0	0	0	0	0	0	0	0.025	0	0.05
Paracoccus caeni	0	0	0	0	0	0	0	0	0	0	0	0	0	0	0	0	0	0	0	0	0	0	0	0	0	0	0	1	0	0	0	0	0	0	0	0	0	0	0	0	0.025	0	0.05
Paracoccus chinensis	0	0	0	0	0	0	0	0	0	0	0	1	0	0	0	0	0	0	0	0	0	0	0	0	0	0	0	0	0	0	0	0	0	0	0	0	0	0	0	0	0.025	0.05	0
Paracoccus limosus	0	0	0	0	0	0	0	0	0	0	0	0	0	0	0	0	0	0	0	0	0	0	0	0	0	0	0	0	0	0	0	1	0	0	0	0	0	0	0	0	0.025	0	0.05
Paracoccus marcusii Oral Taxon A21	0	0	0	0	0	0	0	0	0	0	0	0	0	0	0	0	0	0	0	0	0	0	0	0	0	0	0	0	0	0	0	1	0	0	0	0	0	0	0	0	0.025	0	0.05
Paracoccus sp. Oral Taxon A23	0	0	0	0	0	0	0	0	0	0	0	0	0	0	0	0	0	0	0	0	0	0	0	0	0	0	0	1	0	0	0	0	0	0	0	0	0	0	0	0	0.025	0	0.05
Paracoccus yeei	0	0	0	0	0	1	0	0	0	0	0	0	0	0	0	0	0	0	0	0	0	0	0	0	0	0	0	0	0	0	0	0	0	0	0	0	0	0	0	0	0.025	0.05	0
Rhodobacter capsulatus nov 88.81%	0	0	0	0	0	0	0	0	0	0	0	0	0	0	0	0	0	0	0	0	0	0	0	0	0	0	0	0	0	0	0	1	0	0	0	0	0	0	0	0	0.025	0	0.05
Rhodobacter capsulatus nov 89.37%	0	0	0	0	0	0	0	0	0	0	0	0	0	0	0	0	0	0	0	0	0	0	0	0	0	0	0	0	0	0	0	1	0	0	0	0	0	0	0	0	0.025	0	0.05
Rhodobacter capsulatus nov 91.57%	0	0	0	0	0	0	0	0	0	0	0	0	0	1	0	0	0	0	0	0	0	0	0	0	0	0	0	0	0	0	0	0	0	0	0	0	0	0	0	0	0.025	0.05	0
Altererythrobacter atlanticus	0	0	0	0	0	0	0	0	0	0	0	1	0	0	0	0	0	0	0	0	0	0	0	0	0	0	0	0	0	0	0	0	0	0	0	0	0	0	0	0	0.025	0.05	0
Altererythrobacter dongtanensis	0	0	0	0	0	0	0	0	0	0	0	0	0	0	0	0	0	0	0	0	0	0	0	0	0	0	0	0	0	0	0	1	0	0	0	0	0	0	0	0	0.025	0	0.05
Novosphingobium pentaromativorans	1	0	0	0	0	0	0	0	0	0	0	0	0	0	0	0	0	0	0	0	0	0	0	0	0	0	0	0	0	0	0	0	0	0	0	0	0	0	0	0	0.025	0.05	0
Porphyrobacter tepidarius nov 94.70%	0	0	0	0	0	1	0	0	0	0	0	0	0	0	0	0	0	0	0	0	0	0	0	0	0	0	0	0	0	0	0	0	0	0	0	0	0	0	0	0	0.025	0.05	0
Porphyrobacter tepidarius nov 94.93%	0	0	0	0	0	0	0	0	0	0	0	0	0	0	0	0	0	0	0	0	0	0	0	0	0	0	0	0	0	0	0	1	0	0	0	0	0	0	0	0	0.025	0	0.05
Sphingobium japonicum	0	0	0	0	0	0	0	0	0	0	0	0	0	0	0	0	0	0	0	0	0	0	0	0	0	0	0	0	0	0	0	1	0	0	0	0	0	0	0	0	0.025	0	0.05
Sphingobium yanoikuyae	0	0	0	0	0	0	0	0	0	0	0	0	0	0	0	0	0	0	0	0	0	0	0	0	0	0	0	0	0	0	0	1	0	0	0	0	0	0	0	0	0.025	0	0.05
Sphingomonas astaxanthinifaciens	0	0	0	1	0	0	0	0	0	0	0	0	0	0	0	0	0	0	0	0	0	0	0	0	0	0	0	0	0	0	0	0	0	0	0	0	0	0	0	0	0.025	0.05	0
Sphingomonas echinoides nov 97.67%	0	0	0	0	0	0	0	0	1	0	0	0	0	0	0	0	0	0	0	0	0	0	0	0	0	0	0	0	0	0	0	0	0	0	0	0	0	0	0	0	0.025	0.05	0
Sphingomonas elodea	0	0	0	0	0	0	0	0	0	0	0	0	0	0	0	0	0	0	0	0	0	0	0	0	0	0	0	0	0	0	0	1	0	0	0	0	0	0	0	0	0.025	0	0.05
Sphingomonas ginsengisoli An et al. 2013	0	0	0	0	0	0	0	0	0	0	0	0	0	0	0	0	0	0	0	0	0	0	0	0	0	1	0	0	0	0	0	0	0	0	0	0	0	0	0	0	0.025	0	0.05
Sphingomonas humi	0	0	0	0	0	0	0	0	0	0	0	0	0	0	0	0	0	0	0	0	0	0	0	0	0	0	0	0	0	0	0	1	0	0	0	0	0	0	0	0	0.025	0	0.05
Sphingomonas multispecies spp38 3	0	0	0	0	0	0	0	0	0	0	0	0	0	0	0	1	0	0	0	0	0	0	0	0	0	0	0	0	0	0	0	0	0	0	0	0	0	0	0	0	0.025	0.05	0
Sphingomonas paucimobilis	0	0	0	0	0	0	0	0	0	0	0	0	0	0	0	0	0	0	0	0	0	0	0	0	0	0	0	1	0	0	0	0	0	0	0	0	0	0	0	0	0.025	0	0.05
Sphingomonas sanguinis	0	0	0	0	0	0	0	0	0	0	0	0	0	0	0	1	0	0	0	0	0	0	0	0	0	0	0	0	0	0	0	0	0	0	0	0	0	0	0	0	0.025	0.05	0
Sphingomonas sp. Oral Taxon A74	0	0	0	0	0	0	0	0	0	0	0	0	0	0	0	0	0	0	0	0	0	0	0	0	0	0	0	0	0	0	0	1	0	0	0	0	0	0	0	0	0.025	0	0.05
Sphingomonas sp. Oral Taxon B65	0	1	0	0	0	0	0	0	0	0	0	0	0	0	0	0	0	0	0	0	0	0	0	0	0	0	0	0	0	0	0	0	0	0	0	0	0	0	0	0	0.025	0.05	0
Sphingomonas sp. oral taxon 004	0	0	0	0	0	0	0	0	0	0	0	0	0	0	0	0	0	0	0	0	0	0	0	0	0	0	0	0	0	0	0	1	0	0	0	0	0	0	0	0	0.025	0	0.05
Sphingomonas sp. oral taxon 004 nov 94.02%	0	0	0	1	0	0	0	0	0	0	0	0	0	0	0	0	0	0	0	0	0	0	0	0	0	0	0	0	0	0	0	0	0	0	0	0	0	0	0	0	0.025	0.05	0
Sphingomonas sp. oral taxon 004 nov 94.94%	0	0	0	0	0	0	0	0	0	0	0	0	0	0	0	0	0	0	0	0	0	0	0	0	0	0	0	0	0	0	0	1	0	0	0	0	0	0	0	0	0.025	0	0.05
Sphingomonas sp. oral taxon 006 nov 83.04%	0	0	0	0	0	0	0	0	0	0	0	0	0	0	0	0	0	0	0	0	0	0	0	0	0	0	0	0	0	0	0	1	0	0	0	0	0	0	0	0	0.025	0	0.05
Sphingomonas sp. oral taxon 006 nov 83.56%	0	0	0	0	0	0	0	0	0	0	0	0	0	0	0	0	0	0	0	0	0	0	0	0	0	0	0	0	0	0	0	1	0	0	0	0	0	0	0	0	0.025	0	0.05
Betaproteobacteria [G] sp. Oral Taxon C83	0	0	0	0	0	0	0	0	0	0	0	0	0	0	0	0	1	0	0	0	0	0	0	0	0	0	0	0	0	0	0	0	0	0	0	0	0	0	0	0	0.025	0.05	0
Castellaniella ginsengisoli	0	0	0	0	0	0	0	0	0	0	0	0	0	0	0	0	0	0	0	0	0	0	0	0	0	0	0	0	0	0	0	1	0	0	0	0	0	0	0	0	0.025	0	0.05
Ralstonia pickettii nov 80.51%	0	0	0	0	0	0	0	0	0	0	0	0	0	0	0	0	0	0	0	0	0	0	0	0	0	0	0	0	0	0	1	0	0	0	0	0	0	0	0	0	0.025	0	0.05
Comamonadaceae [G] sp. Oral Taxon B87	0	0	0	0	0	0	0	0	0	0	0	0	1	0	0	0	0	0	0	0	0	0	0	0	0	0	0	0	0	0	0	0	0	0	0	0	0	0	0	0	0.025	0.05	0
Comamonas testosteroni nov 93.81%	0	0	0	0	0	0	0	0	0	0	0	0	0	0	0	0	0	0	0	0	0	0	0	0	0	0	0	0	0	0	0	1	0	0	0	0	0	0	0	0	0.025	0	0.05
Delftia acidovorans nov 93.02%	0	0	0	0	0	0	0	0	0	0	0	0	0	0	0	0	0	0	0	0	0	0	0	0	0	0	0	0	0	0	0	1	0	0	0	0	0	0	0	0	0.025	0	0.05
Hydrogenophaga intermedia	0	0	0	0	0	0	0	0	0	0	0	0	0	0	0	0	0	0	0	0	0	0	0	0	0	0	0	1	0	0	0	0	0	0	0	0	0	0	0	0	0.025	0	0.05
Leptothrix sp. oral taxon 025 nov 95.28%	0	0	0	0	0	0	0	0	0	0	0	0	0	0	0	0	0	0	0	0	0	0	0	0	0	0	0	0	0	0	0	1	0	0	0	0	0	0	0	0	0.025	0	0.05
Ottowia sp. oral taxon 894 nov 95.25%	0	0	0	0	0	0	0	0	0	0	0	0	0	0	1	0	0	0	0	0	0	0	0	0	0	0	0	0	0	0	0	0	0	0	0	0	0	0	0	0	0.025	0.05	0
Ottowia sp. oral taxon 894 nov 96.67%	0	0	0	0	0	0	0	1	0	0	0	0	0	0	0	0	0	0	0	0	0	0	0	0	0	0	0	0	0	0	0	0	0	0	0	0	0	0	0	0	0.025	0.05	0
Schlegelella thermodepolymerans nov 89.02%	0	0	0	0	0	0	0	0	0	0	0	0	0	0	0	0	1	0	0	0	0	0	0	0	0	0	0	0	0	0	0	0	0	0	0	0	0	0	0	0	0.025	0.05	0
Variovorax paradoxus nov 84.34%	0	0	0	0	0	0	0	0	0	0	0	0	0	0	0	0	0	0	0	0	0	0	0	0	0	0	0	0	0	0	0	0	1	0	0	0	0	0	0	0	0.025	0	0.05
Aquabacterium olei	0	0	0	0	0	0	0	0	0	0	0	0	0	0	0	0	0	0	0	0	0	0	0	0	0	0	0	1	0	0	0	0	0	0	0	0	0	0	0	0	0.025	0	0.05
Aquincola tertiaricarbonis	1	0	0	0	0	0	0	0	0	0	0	0	0	0	0	0	0	0	0	0	0	0	0	0	0	0	0	0	0	0	0	0	0	0	0	0	0	0	0	0	0.025	0.05	0
Herbaspirillum sp. Oral Taxon A32 nov 76.88%	0	0	0	0	1	0	0	0	0	0	0	0	0	0	0	0	0	0	0	0	0	0	0	0	0	0	0	0	0	0	0	0	0	0	0	0	0	0	0	0	0.025	0.05	0
Massilia dura	0	0	0	0	0	0	0	0	0	0	0	0	0	0	0	0	0	1	0	0	0	0	0	0	0	0	0	0	0	0	0	0	0	0	0	0	0	0	0	0	0.025	0.05	0
Massilia yuzhufengensis	0	0	1	0	0	0	0	0	0	0	0	0	0	0	0	0	0	0	0	0	0	0	0	0	0	0	0	0	0	0	0	0	0	0	0	0	0	0	0	0	0.025	0.05	0
Oxalobacteraceae [G] sp. Oral Taxon C91	0	0	0	0	0	0	0	0	0	0	0	0	0	0	0	0	0	0	0	0	0	0	0	0	0	0	0	0	0	0	0	0	0	0	0	0	1	0	0	0	0.025	0	0.05
Eikenella corrodens nov 94.55%	0	0	0	0	0	0	0	0	0	0	0	0	0	1	0	0	0	0	0	0	0	0	0	0	0	0	0	0	0	0	0	0	0	0	0	0	0	0	0	0	0.025	0.05	0
Kingella kingae nov 85.14%	0	0	0	0	0	0	0	0	0	0	0	0	0	0	0	0	0	0	0	0	0	0	0	0	0	1	0	0	0	0	0	0	0	0	0	0	0	0	0	0	0.025	0	0.05
Kingella sp. oral taxon 012	0	0	0	0	0	0	0	0	0	0	0	0	0	0	0	0	0	0	0	0	0	0	0	0	0	0	0	0	0	0	0	0	0	0	0	0	0	0	1	0	0.025	0	0.05
Kingella sp. oral taxon 932 nov 96.75%	0	0	0	0	0	0	0	0	0	0	0	0	0	0	0	0	0	0	0	0	0	0	0	0	0	0	0	0	1	0	0	0	0	0	0	0	0	0	0	0	0.025	0	0.05
Neisseria bacilliformis nov 97.96%	0	0	0	0	0	0	0	0	0	0	0	0	0	0	0	0	0	0	0	0	0	0	0	0	0	1	0	0	0	0	0	0	0	0	0	0	0	0	0	0	0.025	0	0.05
Neisseria elongata nov 97.56%	0	0	0	0	0	0	0	0	0	0	0	0	0	0	0	0	0	0	0	0	0	0	0	0	0	1	0	0	0	0	0	0	0	0	0	0	0	0	0	0	0.025	0	0.05
Neisseria flavescens|subflava nov 95.93%	0	0	0	0	0	0	0	0	0	0	0	0	0	0	0	0	0	0	0	0	0	0	0	0	0	0	0	0	0	0	0	0	0	0	0	1	0	0	0	0	0.025	0	0.05
Neisseria flavescens|subflava nov 96.12%	0	0	0	0	0	0	0	0	0	0	0	0	0	0	0	0	0	0	0	0	0	0	0	0	0	0	0	0	0	0	0	0	0	0	0	1	0	0	0	0	0.025	0	0.05
Neisseria flavescens|subflava nov 96.75%	0	0	0	0	0	0	0	0	0	0	0	0	0	0	0	0	0	0	0	0	0	0	0	0	0	0	0	0	0	0	1	0	0	0	0	0	0	0	0	0	0.025	0	0.05
Neisseria flavescens|subflava nov 97.15%	0	0	0	0	0	0	0	0	0	0	0	0	0	0	0	0	0	0	0	0	0	0	0	0	0	0	0	0	0	0	1	0	0	0	0	0	0	0	0	0	0.025	0	0.05
Neisseria flavescens|subflava nov 97.34%	0	0	0	0	0	0	0	0	0	0	0	0	0	0	0	0	0	0	0	0	0	0	0	0	0	0	0	0	0	0	0	0	0	0	0	1	0	0	0	0	0.025	0	0.05
Neisseria mucosa nov 96.31%	0	0	0	0	0	0	0	0	0	0	0	0	0	0	0	0	0	0	0	0	0	0	0	0	0	0	0	0	0	1	0	0	0	0	0	0	0	0	0	0	0.025	0	0.05
Neisseria pharyngis	0	0	0	0	0	0	0	0	0	0	0	0	0	0	0	0	0	0	0	0	0	0	0	0	0	0	0	0	0	0	0	0	0	0	1	0	0	0	0	0	0.025	0	0.05
Neisseria pharyngis nov 94.31%	0	0	0	0	0	0	0	0	0	0	0	0	1	0	0	0	0	0	0	0	0	0	0	0	0	0	0	0	0	0	0	0	0	0	0	0	0	0	0	0	0.025	0.05	0
Neisseria polysaccharea nov 93.89%	0	0	0	0	0	0	0	0	0	0	0	0	0	0	0	0	0	0	0	0	0	0	0	0	0	0	0	0	0	0	0	0	0	0	0	0	0	1	0	0	0.025	0	0.05
Neisseria sp. oral taxon 499	0	0	0	0	0	0	0	0	0	0	0	1	0	0	0	0	0	0	0	0	0	0	0	0	0	0	0	0	0	0	0	0	0	0	0	0	0	0	0	0	0.025	0.05	0
Neisseria sp. oral taxon 523	0	0	0	0	0	0	1	0	0	0	0	0	0	0	0	0	0	0	0	0	0	0	0	0	0	0	0	0	0	0	0	0	0	0	0	0	0	0	0	0	0.025	0.05	0
Methyloversatilis discipulorum	0	0	0	1	0	0	0	0	0	0	0	0	0	0	0	0	0	0	0	0	0	0	0	0	0	0	0	0	0	0	0	0	0	0	0	0	0	0	0	0	0.025	0.05	0
Desulfomicrobium orale	0	0	1	0	0	0	0	0	0	0	0	0	0	0	0	0	0	0	0	0	0	0	0	0	0	0	0	0	0	0	0	0	0	0	0	0	0	0	0	0	0.025	0.05	0
Desulfovibrio sp. oral taxon 040 nov 93.17%	0	0	0	0	0	0	0	0	1	0	0	0	0	0	0	0	0	0	0	0	0	0	0	0	0	0	0	0	0	0	0	0	0	0	0	0	0	0	0	0	0.025	0.05	0
Arcobacter butzleri	0	0	0	0	0	0	0	0	1	0	0	0	0	0	0	0	0	0	0	0	0	0	0	0	0	0	0	0	0	0	0	0	0	0	0	0	0	0	0	0	0.025	0.05	0
Campylobacter concisus nov 97.20%	0	0	0	0	0	0	0	0	0	0	0	0	0	0	0	0	0	0	0	0	0	0	0	0	0	0	1	0	0	0	0	0	0	0	0	0	0	0	0	0	0.025	0	0.05
Campylobacter concisus nov 97.84%	0	0	0	0	0	0	0	0	0	0	1	0	0	0	0	0	0	0	0	0	0	0	0	0	0	0	0	0	0	0	0	0	0	0	0	0	0	0	0	0	0.025	0.05	0
Campylobacter curvus	0	0	0	0	0	0	0	0	0	0	0	0	0	0	0	0	0	0	0	0	0	0	0	0	0	0	0	0	0	0	0	0	0	0	1	0	0	0	0	0	0.025	0	0.05
Campylobacter showae nov 93.16%	0	0	0	0	0	0	0	0	0	0	0	0	0	0	0	0	0	0	0	0	0	0	0	0	0	1	0	0	0	0	0	0	0	0	0	0	0	0	0	0	0.025	0	0.05
Campylobacter sp. oral taxon 044 nov 96.98%	0	0	0	0	1	0	0	0	0	0	0	0	0	0	0	0	0	0	0	0	0	0	0	0	0	0	0	0	0	0	0	0	0	0	0	0	0	0	0	0	0.025	0.05	0
Campylobacter sp. oral taxon 044 nov 97.82%	0	0	0	0	0	0	0	0	0	0	1	0	0	0	0	0	0	0	0	0	0	0	0	0	0	0	0	0	0	0	0	0	0	0	0	0	0	0	0	0	0.025	0.05	0
Helicobacter pylori nov 92.24%	0	0	0	0	0	0	0	0	0	0	0	0	0	0	0	0	0	0	0	0	0	0	0	0	0	0	0	0	0	0	0	0	0	0	1	0	0	0	0	0	0.025	0	0.05
Aeromonas taiwanensis	0	0	0	0	0	0	0	0	0	0	0	0	0	0	0	1	0	0	0	0	0	0	0	0	0	0	0	0	0	0	0	0	0	0	0	0	0	0	0	0	0.025	0.05	0
Cardiobacterium hominis nov 84.88%	0	0	0	0	0	0	0	0	0	0	0	0	0	0	0	0	0	0	0	0	0	0	0	0	0	0	0	0	0	0	0	1	0	0	0	0	0	0	0	0	0.025	0	0.05
Rheinheimera mesophila	0	0	0	0	0	0	1	0	0	0	0	0	0	0	0	0	0	0	0	0	0	0	0	0	0	0	0	0	0	0	0	0	0	0	0	0	0	0	0	0	0.025	0.05	0
Citrobacter rodentium	0	0	0	0	0	0	0	0	0	1	0	0	0	0	0	0	0	0	0	0	0	0	0	0	0	0	0	0	0	0	0	0	0	0	0	0	0	0	0	0	0.025	0.05	0
Citrobacter sedlakii	0	0	0	0	0	0	0	0	0	1	0	0	0	0	0	0	0	0	0	0	0	0	0	0	0	0	0	0	0	0	0	0	0	0	0	0	0	0	0	0	0.025	0.05	0
Citrobacter youngae	0	0	0	0	0	0	0	0	0	1	0	0	0	0	0	0	0	0	0	0	0	0	0	0	0	0	0	0	0	0	0	0	0	0	0	0	0	0	0	0	0.025	0.05	0
Enterobacter kobei	0	0	0	0	0	0	0	0	0	1	0	0	0	0	0	0	0	0	0	0	0	0	0	0	0	0	0	0	0	0	0	0	0	0	0	0	0	0	0	0	0.025	0.05	0
Pseudocitrobacter faecalis	0	0	0	0	0	0	0	0	0	1	0	0	0	0	0	0	0	0	0	0	0	0	0	0	0	0	0	0	0	0	0	0	0	0	0	0	0	0	0	0	0.025	0.05	0
Rosenbergiella epipactidis	0	0	0	0	0	0	0	0	0	0	0	0	0	0	0	0	1	0	0	0	0	0	0	0	0	0	0	0	0	0	0	0	0	0	0	0	0	0	0	0	0.025	0.05	0
Tatumella ptyseos	0	0	0	0	0	0	0	0	0	1	0	0	0	0	0	0	0	0	0	0	0	0	0	0	0	0	0	0	0	0	0	0	0	0	0	0	0	0	0	0	0.025	0.05	0
Enterobacter sp. str. 638	0	0	0	0	0	0	0	0	0	1	0	0	0	0	0	0	0	0	0	0	0	0	0	0	0	0	0	0	0	0	0	0	0	0	0	0	0	0	0	0	0.025	0.05	0
Erwinia aphidicola	0	0	0	0	0	0	0	0	0	1	0	0	0	0	0	0	0	0	0	0	0	0	0	0	0	0	0	0	0	0	0	0	0	0	0	0	0	0	0	0	0.025	0.05	0
Escherichia coli nov 87.40%	0	0	0	0	0	0	0	0	0	0	0	0	0	0	0	0	0	0	0	0	0	0	0	0	0	0	0	0	0	0	1	0	0	0	0	0	0	0	0	0	0.025	0	0.05
Escherichia coli nov 94.50%	0	0	0	0	0	0	0	0	0	1	0	0	0	0	0	0	0	0	0	0	0	0	0	0	0	0	0	0	0	0	0	0	0	0	0	0	0	0	0	0	0.025	0.05	0
Escherichia coli nov 94.73%	0	0	0	0	0	0	0	0	0	1	0	0	0	0	0	0	0	0	0	0	0	0	0	0	0	0	0	0	0	0	0	0	0	0	0	0	0	0	0	0	0.025	0.05	0
Klebsiella pneumoniae nov 94.93%	0	0	0	0	0	0	0	0	0	1	0	0	0	0	0	0	0	0	0	0	0	0	0	0	0	0	0	0	0	0	0	0	0	0	0	0	0	0	0	0	0.025	0.05	0
Morganella sp. str. JB T16	0	0	0	0	0	0	0	0	0	0	0	0	0	0	0	1	0	0	0	0	0	0	0	0	0	0	0	0	0	0	0	0	0	0	0	0	0	0	0	0	0.025	0.05	0
Proteus mirabilis nov 94.55%	0	0	0	0	0	0	0	0	0	0	0	0	0	0	0	1	0	0	0	0	0	0	0	0	0	0	0	0	0	0	0	0	0	0	0	0	0	0	0	0	0.025	0.05	0
Proteus mirabilis nov 94.72%	0	0	0	0	0	0	0	0	0	0	0	0	0	1	0	0	0	0	0	0	0	0	0	0	0	0	0	0	0	0	0	0	0	0	0	0	0	0	0	0	0.025	0.05	0
Salmonella Schwarzengrund ss enterica	0	0	0	0	0	0	0	0	0	1	0	0	0	0	0	0	0	0	0	0	0	0	0	0	0	0	0	0	0	0	0	0	0	0	0	0	0	0	0	0	0.025	0.05	0
Salmonella multispecies spp40 2	0	0	0	0	0	0	0	0	0	1	0	0	0	0	0	0	0	0	0	0	0	0	0	0	0	0	0	0	0	0	0	0	0	0	0	0	0	0	0	0	0.025	0.05	0
Salmonella multispecies spp7 2	0	0	0	0	0	0	0	0	0	1	0	0	0	0	0	0	0	0	0	0	0	0	0	0	0	0	0	0	0	0	0	0	0	0	0	0	0	0	0	0	0.025	0.05	0
multigenus multispecies spp5 3	0	0	0	0	0	0	0	0	0	1	0	0	0	0	0	0	0	0	0	0	0	0	0	0	0	0	0	0	0	0	0	0	0	0	0	0	0	0	0	0	0.025	0.05	0
multigenus multispecies spp6 4	0	0	0	0	0	0	0	0	0	1	0	0	0	0	0	0	0	0	0	0	0	0	0	0	0	0	0	0	0	0	0	0	0	0	0	0	0	0	0	0	0.025	0.05	0
Zymobacter palmae	0	0	0	0	0	0	0	0	0	0	0	0	0	0	0	0	0	0	0	0	0	0	0	0	0	0	0	0	0	0	0	1	0	0	0	0	0	0	0	0	0.025	0	0.05
Aggregatibacter aphrophilus nov 95.33%	0	0	0	0	0	0	0	0	0	0	0	1	0	0	0	0	0	0	0	0	0	0	0	0	0	0	0	0	0	0	0	0	0	0	0	0	0	0	0	0	0.025	0.05	0
Aggregatibacter paraphrophilus nov 96.33%	0	0	0	0	0	0	0	0	0	0	0	0	0	0	0	0	0	0	0	0	0	0	0	0	0	0	0	0	0	1	0	0	0	0	0	0	0	0	0	0	0.025	0	0.05
Aggregatibacter paraphrophilus nov 97.36%	0	0	0	0	0	0	0	0	0	0	0	0	0	0	0	0	0	0	0	0	0	0	0	0	0	0	0	0	0	1	0	0	0	0	0	0	0	0	0	0	0.025	0	0.05
Aggregatibacter sp. oral taxon 513	0	0	0	0	0	0	0	0	0	0	0	0	0	0	0	0	0	0	0	0	0	0	0	0	0	0	0	0	0	0	0	0	1	0	0	0	0	0	0	0	0.025	0	0.05
Aggregatibacter sp. oral taxon 898 nov 96.33%	0	0	0	0	0	0	0	0	0	0	0	0	0	0	0	0	0	0	0	0	0	0	0	0	0	0	0	0	0	0	0	0	0	0	0	1	0	0	0	0	0.025	0	0.05
Aggregatibacter sp. oral taxon 898 nov 97.96%	0	0	0	0	0	0	0	0	0	0	0	0	0	0	1	0	0	0	0	0	0	0	0	0	0	0	0	0	0	0	0	0	0	0	0	0	0	0	0	0	0.025	0.05	0
Aggregatibacter sp. oral taxon 949 nov 95.10%	0	0	0	0	0	0	0	0	0	0	0	0	0	0	0	0	0	0	0	0	0	0	0	0	0	0	0	0	0	0	0	0	1	0	0	0	0	0	0	0	0.025	0	0.05
Aggregatibacter sp. oral taxon 949 nov 97.15%	0	0	0	0	0	0	0	0	0	0	0	0	0	0	0	0	0	0	0	0	0	0	0	0	0	1	0	0	0	0	0	0	0	0	0	0	0	0	0	0	0.025	0	0.05
Haemophilus aegyptius	0	0	0	0	0	0	0	0	0	0	0	0	0	0	0	0	0	0	0	0	1	0	0	0	0	0	0	0	0	0	0	0	0	0	0	0	0	0	0	0	0.025	0	0.05
Haemophilus haemolyticus nov 97.76%	0	0	0	0	0	0	0	0	0	0	0	0	0	0	0	0	0	0	0	0	0	0	0	0	0	0	0	0	0	0	0	1	0	0	0	0	0	0	0	0	0.025	0	0.05
Haemophilus multispecies spp39 2	0	0	0	0	0	0	0	0	0	0	0	0	0	0	0	0	0	0	0	0	0	1	0	0	0	0	0	0	0	0	0	0	0	0	0	0	0	0	0	0	0.025	0	0.05
Haemophilus parahaemolyticus nov 96.56%	0	0	0	0	0	0	0	0	0	0	0	1	0	0	0	0	0	0	0	0	0	0	0	0	0	0	0	0	0	0	0	0	0	0	0	0	0	0	0	0	0.025	0.05	0
Haemophilus parainfluenzae nov 96.93%	0	0	0	0	0	0	0	0	0	0	0	0	0	0	0	0	0	0	0	0	0	0	0	0	0	0	1	0	0	0	0	0	0	0	0	0	0	0	0	0	0.025	0	0.05
Haemophilus paraphrohaemolyticus nov 96.11%	0	0	0	0	0	0	0	0	0	0	0	0	0	0	0	0	0	0	0	0	0	0	0	0	0	0	0	0	0	0	0	0	0	0	0	1	0	0	0	0	0.025	0	0.05
Haemophilus sp. oral taxon 036 nov 96.93%	0	0	0	0	0	0	0	0	0	0	0	0	0	0	0	0	0	0	0	0	1	0	0	0	0	0	0	0	0	0	0	0	0	0	0	0	0	0	0	0	0.025	0	0.05
Haemophilus sp. oral taxon 908 nov 96.74%	0	0	0	0	0	0	0	0	0	0	0	0	0	0	0	0	0	0	0	0	0	1	0	0	0	0	0	0	0	0	0	0	0	0	0	0	0	0	0	0	0.025	0	0.05
Haemophilus sp. oral taxon 908 nov 97.54%	0	0	0	0	0	0	0	0	0	0	0	0	0	0	0	0	0	0	0	0	0	1	0	0	0	0	0	0	0	0	0	0	0	0	0	0	0	0	0	0	0.025	0	0.05
Acinetobacter baumannii nov 89.94%	0	0	0	0	0	0	0	0	0	0	0	0	0	0	0	0	0	0	0	0	0	0	0	0	0	0	0	0	0	0	0	1	0	0	0	0	0	0	0	0	0.025	0	0.05
Acinetobacter sp. Oral Taxon C13	0	0	1	0	0	0	0	0	0	0	0	0	0	0	0	0	0	0	0	0	0	0	0	0	0	0	0	0	0	0	0	0	0	0	0	0	0	0	0	0	0.025	0.05	0
Psychrobacter pulmonis	0	0	0	0	0	0	0	0	0	0	0	0	0	1	0	0	0	0	0	0	0	0	0	0	0	0	0	0	0	0	0	0	0	0	0	0	0	0	0	0	0.025	0.05	0
Psychrobacter sp. cryopeg55	0	1	0	0	0	0	0	0	0	0	0	0	0	0	0	0	0	0	0	0	0	0	0	0	0	0	0	0	0	0	0	0	0	0	0	0	0	0	0	0	0.025	0.05	0
Pseudomonas fluorescens	0	0	0	0	0	0	0	0	0	0	0	0	0	0	0	0	0	0	0	0	0	0	0	0	0	0	0	0	0	0	0	1	0	0	0	0	0	0	0	0	0.025	0	0.05
Pseudomonas lutea	0	0	0	0	0	0	0	0	0	0	0	0	0	0	0	0	0	1	0	0	0	0	0	0	0	0	0	0	0	0	0	0	0	0	0	0	0	0	0	0	0.025	0.05	0
Pseudomonas multispecies spp43 2	0	1	0	0	0	0	0	0	0	0	0	0	0	0	0	0	0	0	0	0	0	0	0	0	0	0	0	0	0	0	0	0	0	0	0	0	0	0	0	0	0.025	0.05	0
Pseudomonas otitidis nov 80.63%	0	0	0	0	0	0	0	0	0	1	0	0	0	0	0	0	0	0	0	0	0	0	0	0	0	0	0	0	0	0	0	0	0	0	0	0	0	0	0	0	0.025	0.05	0
Pseudomonas otitidis nov 96.12%	0	0	0	0	0	0	0	0	0	0	0	0	0	0	0	1	0	0	0	0	0	0	0	0	0	0	0	0	0	0	0	0	0	0	0	0	0	0	0	0	0.025	0.05	0
Pseudomonas pseudoalcaligenes nov 94.40%	0	0	0	0	0	0	0	0	0	0	0	0	0	0	1	0	0	0	0	0	0	0	0	0	0	0	0	0	0	0	0	0	0	0	0	0	0	0	0	0	0.025	0.05	0
Pseudomonas stutzeri Oral Taxon A68	0	0	0	0	0	0	0	0	0	0	0	0	0	0	0	0	0	0	0	0	0	0	0	0	0	0	0	0	0	0	0	1	0	0	0	0	0	0	0	0	0.025	0	0.05
Pseudomonas stutzeri nov 87.27%	0	0	0	0	0	0	0	0	0	0	0	0	0	0	0	0	0	0	0	0	0	0	0	0	0	0	0	0	0	0	1	0	0	0	0	0	0	0	0	0	0.025	0	0.05
Pseudoxanthomonas suwonensis	0	0	0	0	0	0	0	0	0	0	0	0	0	0	0	0	0	1	0	0	0	0	0	0	0	0	0	0	0	0	0	0	0	0	0	0	0	0	0	0	0.025	0.05	0
TM7 [G] sp. Oral Taxon A56	0	0	0	0	0	0	0	0	0	0	1	0	0	0	0	0	0	0	0	0	0	0	0	0	0	0	0	0	0	0	0	0	0	0	0	0	0	0	0	0	0.025	0.05	0
TM7 [G-1] sp. oral taxon 347 nov 94.93%	0	0	0	0	0	0	0	0	0	0	0	0	0	0	0	0	0	0	0	0	0	0	0	0	0	0	0	0	0	0	0	0	0	0	0	0	0	1	0	0	0.025	0	0.05
TM7 [G-1] sp. oral taxon 348 nov 93.45%	0	0	0	0	0	0	0	0	0	0	0	0	0	0	0	0	0	0	0	0	0	0	0	0	0	1	0	0	0	0	0	0	0	0	0	0	0	0	0	0	0.025	0	0.05
TM7 [G-1] sp. oral taxon 348 nov 96.02%	0	0	0	0	0	0	0	0	0	0	0	0	0	0	0	0	0	0	0	0	0	0	0	0	0	1	0	0	0	0	0	0	0	0	0	0	0	0	0	0	0.025	0	0.05
TM7 [G-1] sp. oral taxon 349 nov 97.78%	0	0	0	0	0	0	0	0	0	0	0	0	0	0	0	0	0	0	0	0	0	0	0	0	0	0	0	0	0	0	0	0	1	0	0	0	0	0	0	0	0.025	0	0.05
TM7 [G-1] sp. oral taxon 869	0	0	0	0	0	0	0	0	0	0	0	0	0	0	0	0	0	0	0	0	0	0	0	0	0	1	0	0	0	0	0	0	0	0	0	0	0	0	0	0	0.025	0	0.05
TM7 [G-4] sp. oral taxon 355	0	0	0	0	0	0	0	0	0	0	0	0	0	0	1	0	0	0	0	0	0	0	0	0	0	0	0	0	0	0	0	0	0	0	0	0	0	0	0	0	0.025	0.05	0
Treponema sp. Oral Taxon G76	0	0	0	0	0	0	0	0	0	0	0	0	0	0	0	0	0	0	0	0	0	0	0	0	0	0	0	0	0	0	0	0	0	0	1	0	0	0	0	0	0.025	0	0.05
Treponema amylovorum nov 97.98%	0	0	0	0	0	0	0	0	0	0	1	0	0	0	0	0	0	0	0	0	0	0	0	0	0	0	0	0	0	0	0	0	0	0	0	0	0	0	0	0	0.025	0.05	0
Treponema denticola nov 80.48%	0	0	0	0	0	0	0	0	0	0	0	0	0	0	0	0	0	1	0	0	0	0	0	0	0	0	0	0	0	0	0	0	0	0	0	0	0	0	0	0	0.025	0.05	0
Treponema multispecies spp22 2	0	0	0	0	0	0	0	0	0	0	1	0	0	0	0	0	0	0	0	0	0	0	0	0	0	0	0	0	0	0	0	0	0	0	0	0	0	0	0	0	0.025	0.05	0
Treponema multispecies spp2 2	0	0	0	0	0	0	0	0	0	0	1	0	0	0	0	0	0	0	0	0	0	0	0	0	0	0	0	0	0	0	0	0	0	0	0	0	0	0	0	0	0.025	0.05	0
Treponema multispecies spp31 2	0	0	0	0	1	0	0	0	0	0	0	0	0	0	0	0	0	0	0	0	0	0	0	0	0	0	0	0	0	0	0	0	0	0	0	0	0	0	0	0	0.025	0.05	0
Treponema multispecies spp4 4	0	0	0	0	0	0	0	0	0	0	0	0	0	0	0	0	0	1	0	0	0	0	0	0	0	0	0	0	0	0	0	0	0	0	0	0	0	0	0	0	0.025	0.05	0
Treponema sp. oral taxon 226	0	0	0	0	0	0	0	0	0	0	0	0	0	0	0	0	0	0	0	0	0	0	0	0	1	0	0	0	0	0	0	0	0	0	0	0	0	0	0	0	0.025	0	0.05
Treponema sp. oral taxon 230 nov 97.96%	0	0	0	0	1	0	0	0	0	0	0	0	0	0	0	0	0	0	0	0	0	0	0	0	0	0	0	0	0	0	0	0	0	0	0	0	0	0	0	0	0.025	0.05	0
Treponema sp. oral taxon 231 nov 97.17%	0	0	0	0	0	0	0	0	0	0	0	0	0	0	0	0	0	1	0	0	0	0	0	0	0	0	0	0	0	0	0	0	0	0	0	0	0	0	0	0	0.025	0.05	0
Treponema sp. oral taxon 234 nov 83.43%	0	0	0	0	0	0	0	0	0	0	0	0	0	0	0	0	0	1	0	0	0	0	0	0	0	0	0	0	0	0	0	0	0	0	0	0	0	0	0	0	0.025	0.05	0
Treponema sp. oral taxon 237 nov 97.79%	1	0	0	0	0	0	0	0	0	0	0	0	0	0	0	0	0	0	0	0	0	0	0	0	0	0	0	0	0	0	0	0	0	0	0	0	0	0	0	0	0.025	0.05	0
Treponema sp. oral taxon 238 nov 95.35%	0	0	0	0	0	0	0	0	0	0	1	0	0	0	0	0	0	0	0	0	0	0	0	0	0	0	0	0	0	0	0	0	0	0	0	0	0	0	0	0	0.025	0.05	0
Treponema sp. oral taxon 256	0	0	0	0	0	0	0	0	0	0	0	0	0	0	0	0	0	0	0	0	0	0	0	0	0	0	0	0	0	0	0	0	0	0	1	0	0	0	0	0	0.025	0	0.05
Treponema sp. oral taxon 258 nov 96.98%	0	0	0	0	0	0	0	0	0	0	1	0	0	0	0	0	0	0	0	0	0	0	0	0	0	0	0	0	0	0	0	0	0	0	0	0	0	0	0	0	0.025	0.05	0
Treponema sp. oral taxon 258 nov 97.16%	0	0	0	0	0	0	0	0	0	0	0	0	0	0	0	0	0	0	0	0	0	0	0	0	0	0	0	0	0	0	0	0	0	0	1	0	0	0	0	0	0.025	0	0.05
Treponema sp. oral taxon 262 nov 89.27%	0	0	0	0	1	0	0	0	0	0	0	0	0	0	0	0	0	0	0	0	0	0	0	0	0	0	0	0	0	0	0	0	0	0	0	0	0	0	0	0	0.025	0.05	0
Treponema sp. oral taxon 269	0	0	0	0	0	0	0	0	1	0	0	0	0	0	0	0	0	0	0	0	0	0	0	0	0	0	0	0	0	0	0	0	0	0	0	0	0	0	0	0	0.025	0.05	0
Fretibacterium fastidiosum nov 91.16%	0	0	0	0	1	0	0	0	0	0	0	0	0	0	0	0	0	0	0	0	0	0	0	0	0	0	0	0	0	0	0	0	0	0	0	0	0	0	0	0	0.025	0.05	0
Fretibacterium multispecies spp30 2	0	0	0	0	1	0	0	0	0	0	0	0	0	0	0	0	0	0	0	0	0	0	0	0	0	0	0	0	0	0	0	0	0	0	0	0	0	0	0	0	0.025	0.05	0
Fretibacterium sp. oral taxon 358	0	0	0	0	1	0	0	0	0	0	0	0	0	0	0	0	0	0	0	0	0	0	0	0	0	0	0	0	0	0	0	0	0	0	0	0	0	0	0	0	0.025	0.05	0
Number of species identified	169	139	154	103	160	95	145	122	254	54	215	215	118	83	150	53	104	249	126	82	81	105	99	79	152	161	96	151	116	146	93	165	205	165	245	199	113	192	191	125	1118	795	746
