# Supplementary material for: Inflammatory Bacteriome Featuring <em>Fusobacterium nucleatum</em> and <em>Pseudomonas aeruginosa </em>Identified in Association with Oral Squamous Cell Carcinoma<strong></strong>
Source: Preprints.org preprint supplement (doi:10.20944/preprints201703.0024.v1), 2017-03-06
Supplement: Supplementary file 4 [file ST1. Taxa exclusively found in either group at 15%.docx]

**Inflammatory bacteriome featuring *Fusobacterium nucleatum* and *Pseudomonas aeruginosa* identified in association with oral squamous cell carcinoma**

Nezar Noor Al-hebshi, Akram Thabet Nasher, Mohamed Yousef Maryoud , Husham E. Homeida, Tsute Chen, Ali Mohamed Idris and Newell W Johnson

**Table S4.** List of taxa exclusively identified in either group at prevalence ≥ 15%

| **Exclusively in OSCC** | **%** | **Exclusively in Controls** | **%** |
| --- | --- | --- | --- |
| *Alloscardovia omnicolens* | 35% | *Bergeyella sp.* oral taxon *931* | 50% |
| *Atopobium sp.* oral taxon *199* | 30% | *Bergeyella sp.* oral taxon *931 nov 92.95%* | 40% |
| *Lachnospiraceae [G-7] sp.* oral taxon *163* | 30% | *Haemophilus parainfluenzae nov 97.14%* | 40% |
| *Oribacterium sp.* oral taxon *102* | 30% | *Veillonella sp.* oral taxon *C09* | 35% |
| *Streptobacillus hongkongensis* | 30% | *Porphyromonas pasteri* | 30% |
| *Haemophilus influenzae* | 30% | *Ruminococcaceae [G1] sp.* oral taxon *075 nov 91.53%* | 30% |
| *Peptococcus sp.* oral taxon *167* | 25% | *Neisseria oralis* | 30% |
| *Peptostreptococcaceae [XI][G-4]* *103/369* | 25% | *Granulicatella adiacens nov 95.99%* | 25% |
| *Moraxella osloensis nov 89.07%* | 25% | *Streptococcus peroris* | 25% |
| *Porphyromonas uenonis* | 20% | *Rothia mucilaginosa nov 89.14%* | 20% |
| *Meiothermus timidus* | 20% | *Selenomonas artemidis* | 20% |
| *Staphylococcus aureus* | 20% | *Diaphorobacter nitroreducens* oral taxon *A07* | 20% |
| *Peptoniphilus indolicus* | 20% | *Actinomyces sp.* oral taxon *175 nov 97.96%* | 15% |
| *Peptostreptococcaceae [G] sp.* oral taxon *B61* | 20% | *Actinomyces sp.* oral taxon *178* | 15% |
| *Methylobacterium rhodesianum* | 20% | *Actinomycetales [G] sp.* oral taxon *C05* | 15% |
| *Neisseria sp.* oral taxon *018* | 20% | *Bifidobacterium dentium* | 15% |
| *Dietzia cinnamea nov 93.21%* | 15% | *Prevotella aurantiaca* | 15% |
| *Bifidobacterium longum* | 15% | *Prevotella melaninogenica nov 96.55%* | 15% |
| *Janibacter indicus* | 15% | *Streptococcus sp.* oral taxon *B66* | 15% |
| *Bacteroides fragilis* | 15% | *GN02 [G1] sp.* oral taxon *872* | 15% |
| *Capnocytophaga sp.* oral taxon *901* | 15% | *Betaproteobacteria [G] sp.* oral taxon *B96* | 15% |
| *Enterococcus avium* | 15% | *Campylobacter sp.* oral taxon *G43* | 15% |
| *Lactobacillus salivarius* | 15% | *TM7 [G1] sp.* oral taxon *349 nov 97.79%* | 15% |
| *Butyrivibrio sp.* oral taxon *080* | 15% |  |  |
| *Eubacterium yurii nov 90.91%* | 15% |  |  |
| *Bulleidia extructa* | 15% |  |  |
| *Selenomonas sp.* oral taxon *134* | 15% |  |  |
| *Fusobacterium gonidiaformans* | 15% |  |  |
| *Fusobacterium multispecies spp9 2* | 15% |  |  |
| *Leptotrichia sp.* oral taxon *221 nov 90.45%* | 15% |  |  |
| *Alphaproteobacteria [G] sp.* oral taxon *A28 nov 84.07%* | 15% |  |  |
| *Alphaproteobacteria [G] sp.* oral taxon *C96* | 15% |  |  |
| *Afipia broomeae* | 15% |  |  |
| *Achromobacter xylosoxidans* | 15% |  |  |
| *Alcaligenes sp. str. CO14* | 15% |  |  |
| *Delftia sp.* oral taxon *A59* | 15% |  |  |
| *Ottowia sp.* oral taxon *894 nov 97.31%* | 15% |  |  |
| *Cupriavidus metallidurans* | 15% |  |  |
| *Massilia timonae* | 15% |  |  |
| *Neisseria sp.* oral taxon *018 nov 97.96%* | 15% |  |  |
| *Citrobacter koseri* | 15% |  |  |
| *Escherichia coli* | 15% |  |  |
| *Aggregatibacter paraphrophilus* | 15% |  |  |
| *Acinetobacter baumannii nov 96.09%* | 15% |  |  |
| *Moraxella lacunata* | 15% |  |  |
